# Supplementary material for: Anti-Cancer Potential of Homemade Fresh Garlic Extract Is Related to Increased Endoplasmic Reticulum Stress
Source: MDPI journal article supplement (doi:10.3390/nu10040450), 2018-04-05
Supplement: s1 [file s1]

MS based quantification of proteins pulled down by the MIB-assay. Data is given as log2 values of relative intensity. **Red** indicates increase, **blue** indicates decrease. **Black** indicates no change compared to control.

| nr | Panel1  | Panel2  | Panel3  | Average | Significant (yellow) | Uniprot ID | Protein Name                                                                                    | Gene      | KEGG code  | Kinases | Oxidative stress response protein | Phosphatases | Ubiquitin Ligases | Apoptosis related |
|----|---------|---------|---------|---------|----------------------|------------|-------------------------------------------------------------------------------------------------|-----------|------------|---------|-----------------------------------|--------------|-------------------|-------------------|
| 1  | 0.2735  | 0.5011  | 0.0628  | 0.2661  |                      | P41241     | Tyrosine-protein kinase CSK                                                                     | Csk       | mmu:12988  | 1       |                                   |              |                   |                   |
| 2  | 0.1317  | 0.2554  | 0.1521  | 0.2856  |                      | O55222     | Integrin-linked protein kinase                                                                  | Ilk       | mmu:16202  | 1       |                                   |              |                   |                   |
| 3  | 0.3960  | 0.0038  | 0.3058  | 0.3690  |                      | P47811     | Mitogen-activated protein kinase 14                                                             | Mapk14    | mmu:26416  | 1       |                                   |              |                   |                   |
| 4  | 0.1562  | 0.6205  | 0.2559  | 0.3690  |                      | O61194     | Phosphatidylinositol 4-phosphate 3-kinase C2 domain-containing subunit alpha                    | Pik3c2a   | mmu:18704  | 1       |                                   |              |                   |                   |
| 5  | 0.2356  | 0.3554  | 0.4045  | 0.3704  |                      | P30285     | Cyclin-dependent kinase 4                                                                       | Cdk4      | mmu:12567  | 1       |                                   |              |                   |                   |
| 6  | 0.3117  | 0.4535  | 0.4778  | 0.4143  |                      | O34152     | Focal adhesion kinase                                                                           | Fak2      | mmu:14083  | 1       |                                   |              |                   |                   |
| 7  | 0.2480  | 0.4140  | 0.4100  | 0.3957  |                      | Q5E647     | 5-AMP-activated protein kinase catalytic subunit alpha-1                                        | Pkaa1     | mmu:105787 | 1       | 1                                 |              |                   | 1                 |
| 8  | 0.1779  | 0.5581  | 0.1839  | 0.4095  |                      | O70551     | SRF protein kinase 1                                                                            | Srpk1     | mmu:20815  | 1       |                                   |              |                   |                   |
| 9  | 0.1458  | 0.2131  | 0.3468  | 0.4245  |                      | Q27BE6     | Phosphatidylinositol 4-kinase type 2-alpha                                                      | Pik42a    | mmu:84095  | 1       |                                   |              |                   |                   |
| 10 | 0.2818  | 0.1876  | 0.7366  | 0.4632  |                      | Q8BTW9     | Serine/threonine-protein kinase PAK 4                                                           | Pa4       | mmu:70584  | 1       |                                   |              |                   |                   |
| 11 | 0.8235  | 0.4557  | 0.3463  | 0.4885  |                      | P58801     | Receptor-interacting serine/threonine-protein kinase 2                                          | Ripk2     | mmu:192656 | 1       |                                   |              |                   | 1                 |
| 12 | 0.3867  | 0.4231  | 0.0928  | 0.4948  |                      | Q6PH22     | Calcium/calmodulin-dependent protein kinase type II subunit delta                               | Camk2d    | mmu:108058 | 1       |                                   |              |                   |                   |
| 13 | 0.1962  | 0.2806  | 0.3059  | 0.5223  |                      | Q9E514     | Mitogen-activated protein kinase kinase kinase MLT                                              | Zak       | mmu:65964  | 1       |                                   |              |                   | 1                 |
| 14 | 0.0821  | 0.2689  | 0.4189  | 0.6247  |                      | P20444     | Protein kinase C; Protein kinase C alpha type                                                   | Pkcca     | mmu:18750  | 1       |                                   |              |                   | 1                 |
| 15 | 0.4025  | 0.5714  | 0.4688  | 0.4829  |                      | Q8R4K2     | Interleukin-1 receptor-associated kinase 4                                                      | Irak4     | mmu:266632 | 1       |                                   |              |                   |                   |
| 16 | 0.7036  | 0.2019  | 0.4113  | 0.6353  |                      | Q9UNJ2     | Serine/threonine-protein kinase TBK1                                                            | Tbk1      | mmu:56480  | 1       |                                   |              |                   | 1                 |
| 17 | 1.4806  | 0.6881  | 0.0511  | 0.8128  |                      | Q03147     | Cyclin-dependent kinase 7                                                                       | Cdk7      | mmu:12572  | 1       |                                   |              |                   |                   |
| 18 | 0.4041  | 0.5237  | 0.4620  | 0.8235  |                      | O99KH8     | Serine/threonine-protein kinase 24;Serine/threonine-protein kinase 24 35 kDa subunit;Serine/thr | Slk24     | mmu:223255 | 1       | 1                                 |              |                   |                   |
| 19 | 1.5061  | 0.4959  | 0.8978  | 1.0519  |                      | Q4JIM5     | Non-specific protein-tyrosine kinase;Abelson tyrosine-protein kinase 2                          | Ab12      |            | 1       |                                   |              |                   |                   |
| 20 | -1.2418 | -3.6384 | -1.4988 | -2.5666 |                      | P18155     | Bifunctional methylenetetrahydrofolate dehydrogenase/cyclohydrolase, mitochondrial;NAD-depe     | Mthfd2    | mmu:17768  |         |                                   |              |                   |                   |
| 21 |         |         | -1.8127 | -1.8221 |                      | P63166     | Small ubiquitin-related modifier 1                                                              | Sumo1     | mmu:22218  |         |                                   |              |                   |                   |
| 22 | -0.8880 | -0.9121 | -1.7116 | -1.6991 |                      | O70585     | Dystrobrevin;Dystrobrevin beta                                                                  | Dtnb      | mmu:13528  |         |                                   |              |                   |                   |
| 23 | -0.7734 | -1.7908 | -0.2951 | -1.6011 |                      | Q8CQ6C     | Histone H2A type 1-H;Histone H2A, J;Histone H2A type 1-K;Histone H2A type 1-F;Histone H2A type  | Hist1H2ah | mmu:319168 |         |                                   |              |                   |                   |
| 24 | -0.1035 | -0.1701 | -0.1001 | -0.1151 |                      | O05919     | Vehicle transport protein SEC30                                                                 | Btm1p     | mmu:224630 |         |                                   |              |                   | 1                 |
| 25 | -0.3524 | -1.8097 | -2.8079 | -1.4553 |                      | Q6PGF3     | Mediator of RNA polymerase II transcription subunit 16                                          | Med16     |            |         |                                   |              |                   |                   |
| 26 | -1.7944 | -1.8816 | -0.8445 | -1.4602 |                      | Q2V9P0     | Chromatin modification-related protein MEAF6                                                    | Meaf6     | mmu:70088  |         |                                   |              |                   |                   |
| 27 | -1.3940 | -0.3397 | -2.9703 | -1.3263 |                      | Q8HWO0     | Probable peptidyl-tRNA hydrolase                                                                | Pthr1     | mmu:329384 |         |                                   |              |                   |                   |
| 28 | -0.4172 | -0.7460 | -1.2441 | -1.2318 |                      | Q9Z0P5     | Twirlin-1                                                                                       | Twf2      | mmu:23999  |         |                                   |              |                   |                   |
| 29 | -0.3208 | -0.9051 | -1.8610 | -1.2150 |                      | O88986     | 2-amino-3-ketobutyrate coenzyme A ligase, mitochondrial                                         | Gcat      | mmu:26912  |         |                                   |              |                   |                   |
| 30 | -1.6343 | -1.8991 | -0.1736 | -1.2088 |                      | Q80509     | Epidermal growth factor receptor kinase substrate 8                                             | Eps8      | mmu:13860  |         |                                   |              |                   |                   |
| 31 | -0.2595 | -0.2641 | -2.5339 | -1.2085 |                      | Q9CQV5     | 28S ribosomal protein S24, mitochondrial                                                        | Mps24     | mmu:64660  |         |                                   |              |                   |                   |
| 32 | -1.1228 | -0.6805 | -0.6200 | -1.1477 |                      | Q9D616     | NADH dehydrogenase [ubiquinone] flavoprotein 2, mitochondrial                                   | Ndufv2    | mmu:72900  |         |                                   |              |                   |                   |
| 33 | -0.4339 | -1.8482 | -0.5809 | -1.3226 |                      | Q60870     | Receptor expression-enhancing protein                                                           | Reep1     | mmu:108070 |         |                                   |              |                   |                   |
| 34 | -0.9002 | -0.1455 | -0.9085 | -1.0747 |                      | Q90P38     | 39S ribosomal protein L19, mitochondrial                                                        | Mpl19     | mmu:56284  |         |                                   |              |                   |                   |
| 35 | -0.4515 | -0.7921 | -2.9000 | -1.0724 |                      | O89017     | Legumain                                                                                        | Lgmn      | mmu:19141  |         |                                   |              |                   |                   |
| 36 | -2.1760 | -1.4607 | -0.3223 | -1.0707 |                      | P62309     | Small nuclear ribonucleoprotein G                                                               | Snrpg     | mmu:68011  |         |                                   |              |                   |                   |
| 37 | -0.3868 | -0.2433 | -2.5326 | -1.0590 |                      | P1A2E6     | THO complex subunit 2                                                                           | Thoc2     | mmu:331401 |         |                                   |              |                   |                   |
| 38 | -2.1888 | -0.6123 | -0.3683 | -1.0183 |                      | ARQ528     | Rho guanine nucleotide exchange factor 7                                                        | Arhgef7   | mmu:54126  |         |                                   |              |                   |                   |
| 39 | -0.7856 | -0.3085 | -0.9559 | -0.9398 |                      | Q9DC23     | Dnal homolog subfamily C member 10                                                              | Dnal10    | mmu:66861  |         |                                   |              |                   |                   |
| 40 | -0.0940 | -0.9203 | -0.9162 | -0.9165 |                      | Q8V813     | Transcription initiation factor TFIIID subunit 9                                                | Taf9      | mmu:108143 |         |                                   |              |                   |                   |
| 41 | -0.8967 | -0.0966 | -0.0966 | -0.9062 |                      | Q64433     | 10 kDa heat shock protein, mitochondrial                                                        | Hsp61     | mmu:15528  |         |                                   |              |                   | 1                 |
| 42 | -0.4717 | -0.6920 | -0.0598 | -0.8912 |                      | Q3UWQ27    |                                                                                                 | Gsp1      |            |         |                                   |              |                   |                   |
| 43 | -0.2651 | -0.9754 | -0.5757 | -0.8739 |                      | Q8C111     | Guanine nucleotide-binding protein-like 3                                                       | Gnp1      | mmu:30877  |         |                                   |              |                   |                   |
| 44 | -0.2029 | -0.1194 | -1.3544 | -0.8784 |                      | P47862     | ADP/ATP translocase 1                                                                           | Slc25a4   | mmu:11739  |         |                                   |              |                   |                   |
| 45 | -0.5638 | -0.9832 | -1.0664 | -0.8669 |                      | Q17OK1     | Integrator complex subunit 7                                                                    | Ints7     | mmu:77065  |         |                                   |              |                   |                   |
| 46 | -0.1893 | -1.0326 | -0.4387 | -0.8546 |                      | Q60932     | Voltage-dependent anion-selective channel protein 1                                             | Vdac1     | mmu:22333  |         |                                   |              |                   |                   |
| 47 | -1.0699 | -0.1522 | -0.4572 | -0.8510 |                      | P61750     | ADP-ribosylation factor 4                                                                       | Arf4      | mmu:11843  |         |                                   |              |                   |                   |
| 48 | -0.1131 | -0.8918 | -0.6164 | -0.8487 |                      | EQD4P1     |                                                                                                 | Wdlyf1    | mmu:69368  |         |                                   |              |                   |                   |
| 49 | -0.5191 | -0.1387 | -0.3482 | -0.8348 |                      | Q6N211     | Sulfite oxidase, mitochondrial                                                                  | Dhx37     | mmu:208144 |         |                                   |              |                   |                   |
| 50 | -0.2446 | -0.0949 | -0.0949 | -0.8341 |                      | Q8R086     |                                                                                                 | Suox      | mmu:211389 |         |                                   |              |                   |                   |
| 51 | -0.6481 | -0.1914 | -0.8230 | -0.8063 |                      | EQD700     |                                                                                                 | Nuap1     | mmu:101706 |         |                                   |              |                   |                   |
| 52 | -0.7021 | -0.1285 | -0.5701 | -0.8063 |                      | P57759     | Endoplasmic reticulum resident protein 29                                                       | Erp29     | mmu:67397  |         |                                   |              |                   |                   |
| 53 | -0.1933 | -0.5966 | -0.1730 | -0.8056 |                      | Q05793     | Basement membrane-specific heparan sulfate proteoglycan core protein;Endorepellin;LG3 peptidi   | Hspg2     | mmu:15530  |         |                                   |              |                   |                   |
| 54 | -1.7207 | -0.3241 | -0.7494 | -0.7866 |                      | P61164     | Alpha-actinin                                                                                   | Act1a     | mmu:54130  |         |                                   |              |                   |                   |
| 55 | -1.3803 | -0.1267 | -0.6762 | -0.7739 |                      | Q9CQV6     | Ubiquitin-cytochrome c reductase complex assembly factor 2                                      | Uqc2c     | mmu:67267  |         |                                   |              |                   |                   |
| 56 | -1.0046 | -1.4500 | -0.7661 | -1.0735 |                      | Q9U1W67    | Ubiquitin-like protein 7                                                                        | Ubl7      | mmu:69459  |         |                                   |              |                   |                   |
| 57 | -0.3061 | -0.5293 | -0.3057 | -0.7624 |                      | Q9CQ60     | 6-phosphogluconolactonase                                                                       | Pgl5      | mmu:66171  |         |                                   |              |                   |                   |
| 58 | -0.0689 | -0.0689 | -0.0689 | -0.7571 |                      | O99N87     | 28S ribosomal protein S5, mitochondrial                                                         | Rps5      | mmu:77721  |         |                                   |              |                   |                   |
| 59 | -0.1224 | -0.2233 | -1.4632 | -0.7486 |                      | Q8V054     | Regulation of nuclear pre-mRNA domain-containing protein 1A                                     | Rpr1a1    | mmu:225283 |         |                                   |              |                   |                   |
| 60 | -0.2738 | -0.4630 | -0.6301 | -0.7196 |                      | Q90A69     | Sorcin                                                                                          | Srn       | mmu:109552 |         |                                   |              |                   |                   |
| 61 | -0.1729 | -1.2203 | -0.6358 | -0.6955 |                      | Q9CP96     | NADH dehydrogenase [ubiquinone] 1 alpha subcomplex subunit 5                                    | Ndufa5    | mmu:14660  |         |                                   |              |                   |                   |
| 62 | -0.0444 | -0.4393 | -0.8092 | -0.6939 |                      | P3Z7P3     | Glutamine synthase, mitochondrial                                                               | Gls       | mmu:71617  |         |                                   |              |                   |                   |
| 63 | -0.1960 | -0.1860 | -1.4865 | -0.6896 |                      | Q6PD19     | UPF0688 protein C10orf76 homolog                                                                | Upf1      | mmu:71617  |         |                                   |              |                   |                   |
| 64 | -0.2531 | -0.7270 | -0.6143 | -0.6863 |                      | Q8R0H9     | ADP-ribosylation factor-binding protein GGA1                                                    | Gga1      | mmu:106039 |         |                                   |              |                   |                   |
| 65 | -0.1140 | -0.2776 | -0.3778 | -0.6850 |                      | Q63943     | Myocyte-specific enhancer factor 2D                                                             | Mezf2     | mmu:17261  |         |                                   |              |                   |                   |
| 66 | -0.8896 | -0.6122 | -0.3576 | -0.6697 |                      | Q91VAG     | Polymerase delta-interacting protein 2                                                          | Polidp2   | mmu:67811  |         |                                   |              |                   |                   |
| 67 | -0.9178 | -0.0988 | -0.0748 | -0.6697 |                      | Q9D873     | NADH-cytochrome b5 reductase 1                                                                  | Cyb5r1    | mmu:72017  |         |                                   |              |                   |                   |
| 68 | -0.1509 | -0.1472 | -0.4170 | -0.6024 |                      | Q90786     | Isobutyryl-CoA dehydrogenase, mitochondrial                                                     | Ibdh      | mmu:66948  |         |                                   |              |                   |                   |
| 69 | -0.1346 | -0.0986 | -0.8531 | -0.6617 |                      | Q9D0D4     | Probable dimethyladenosine transferase                                                          | Dimt1     | mmu:66254  |         |                                   |              |                   |                   |
| 70 | -0.5443 | -0.3470 | -0.6342 | -0.6481 |                      | Q5E408     | G patch domain and KOW motifs-containing protein                                                | Gpkow     | mmu:209416 |         |                                   |              |                   |                   |
| 71 | -1.3672 | -0.3049 | -0.2688 | -0.6450 |                      | Q8BT99     | Inactive hydroxysteroid dehydrogenase-like protein 1                                            | Hsd1l     | mmu:72552  |         |                                   |              |                   |                   |
| 72 | -0.2952 | -0.7705 | -1.4308 | -0.6436 |                      | Q8K120     | Ubiquinone biosynthesis protein COQ9, mitochondrial                                             | Coq9      | mmu:67914  |         |                                   |              |                   |                   |
| 73 | -0.3911 | -0.2657 | -0.5276 | -0.6383 |                      | Q99U17     | Cleavage stimulation factor subunit 3                                                           | Cstf3     | mmu:228410 |         |                                   |              |                   |                   |
| 74 | -0.7399 | -0.3325 | -0.9429 | -0.6346 |                      | Q92167     | Electron transfer flavoprotein-ubiquinone oxidoreductase, mitochondrial                         | Etfhd     | mmu:66841  |         | 1                                 |              |                   |                   |
| 75 | -0.3031 | -0.9252 | -1.1182 | -0.6330 |                      | Q61595     |                                                                                                 | Rpl5      | mmu:16709  |         |                                   |              |                   |                   |
| 76 | -0.9400 | -0.0858 | -0.3206 | -0.6311 |                      | P97461     | 40S ribosomal protein S5;40S ribosomal protein S5, N-terminally processed                       | Kps1      | mmu:20303  |         |                                   |              |                   |                   |
| 77 | -0.7083 | -0.0868 | -0.7763 | -0.6246 |                      | Q90A69     | Ribonucleoprotein PTR-binding-1                                                                 | Rpr1a1    | mmu:71366  |         |                                   |              |                   |                   |
| 78 | -0.4569 | -0.5244 | -1.2479 | -0.6117 |                      | Q9CWE0     | Mitochondrial fission regulator 1-like                                                          | Mfr1l     | mmu:76824  |         |                                   |              |                   |                   |
| 79 | -0.2565 | -0.7439 | -1.1113 | -0.6065 |                      | O9B125     | 39S ribosomal protein L12, mitochondrial                                                        | Mpl12     | mmu:56282  |         |                                   |              |                   |                   |
| 80 | -0.4023 | -1.5767 | -0.2783 | -0.6061 |                      | Q8B124     | 28S ribosomal protein S35, mitochondrial                                                        | Mps35     | mmu:232536 |         |                                   |              |                   |                   |
| 81 | -0.1012 | -0.2471 | -0.3808 | -0.5985 |                      | Q9ROE2     | Procollagen-lysine, 2-oxoglutarate 5-dioxygenase 1                                              | Plod1     | mmu:18822  |         |                                   |              |                   |                   |
| 82 | -0.6063 | -0.2692 | -0.0580 | -0.5904 |                      | Q9C9T8     | COX assembly mitochondrial protein homolog                                                      | Cmc1      | mmu:67899  |         |                                   |              |                   |                   |
| 83 | -0.3716 | -0.8381 |         | -0.5798 |                      | Q9NV99     |                                                                                                 | Hau6      | mmu:230376 |         |                                   |              |                   |                   |
| 84 | -0.1328 | -0.6064 | -1.4146 | -0.5796 |                      | Q9WVF7     | DNA polymerase epsilon catalytic subunit A                                                      | Pole      | mmu:18973  |         |                                   |              |                   |                   |
| 85 | -0.4796 | -0.0903 | -0.0903 | -0.5798 |                      | P12023     | Amyloid beta A4 protein-N-APP-Soluble APP-alpha;Soluble APP-beta;C99;Beta-amyloid protein 42    | App       | mmu:11820  |         |                                   |              |                   |                   |
| 86 | -0.0728 | -0.0728 | -0.5638 | -0.5638 |                      | Q93564     | Hexamer protein cut-like; Protein CASP                                                          | Cas6      | mmu:13847  |         | 1                                 |              |                   |                   |
| 87 | -0.4624 | -1.1233 | -0.5464 | -0.5586 |                      | Q8B712     | C-terminal-binding protein 1                                                                    | Ctbp1     | mmu:13016  |         |                                   |              |                   |                   |
| 88 | -0.6935 | -0.2283 | -1.1386 | -0.5489 |                      | P51807     | Dynein light chain Ctct-type 1                                                                  | Dynl1     | mmu:21648  |         |                                   |              |                   |                   |
| 89 | -0.8148 | -0.1199 | -0.2863 | -0.5422 |                      | Q99Y70     | Trifunctional enzyme subunit beta, mitochondrial;3-ketoacyl-CoA thiolase                        | Hadhb     | mmu:231086 |         |                                   |              |                   |                   |
| 90 | -0.8771 | -0.3920 | -0.1285 | -0.5391 |                      | Q91XK1     |                                                                                                 | Pcdhgc3   | mmu:93706  |         |                                   |              |                   |                   |
| 91 | -0.2759 | -0.8732 | -0.6075 | -0.5303 |                      | P47738     | Aldehyde dehydrogenase, mitochondrial                                                           | Aldh2     | mmu:11669  |         |                                   |              |                   |                   |
| 92 | -0.4336 | -0.0748 | -0.2847 | -0.5252 |                      | Q9D6R2     | Isocitrate dehydrogenase [NAD] subunit alpha, mitochondrial                                     | Ildh3a    | mmu:67834  |         |                                   |              |                   |                   |
| 93 | -0.2061 | -1.4561 | -0.3425 | -0.5241 |                      | Q60749     | KH domain-containing, RNA-binding, signal transduction-associated protein 1                     | Hkbdr1    | mmu:70218  |         |                                   |              |                   |                   |
| 94 | -0.3172 | -0.4492 | -0.2149 | -0.5447 |                      | Q92115     | Conserved oligomeric GRI-gamma subunit 2                                                        | Coq2      | mmu:76332  |         |                                   |              |                   |                   |
| 95 | -0.0910 | -0.2263 | -0.6561 | -0.5279 |                      | Q12779     | Guanine nucleotide-binding protein G(q) subunit alpha                                           | Gtq2      | mmu:14682  |         |                                   |              |                   |                   |
| 96 | -0.0742 | -0.3326 | -1.3466 | -0.5108 |                      | P17426     | AP-2 complex subunit alpha-1                                                                    | Ap2a1     | mmu:11771  |         |                                   |              |                   |                   |
| 97 | -0.3163 | -0.6315 | -0.9811 | -0.5000 |                      | Q91YN9     | BAG family molecular chaperone regulator 2                                                      | Bag2      | mmu:213539 |         | 1                                 |              |                   |                   |

|     |         |         |         |         |   |        |                                                                                                |            |            |   |   |
|-----|---------|---------|---------|---------|---|--------|------------------------------------------------------------------------------------------------|------------|------------|---|---|
| 116 | -0.1468 | -0.1631 | -0.7065 | -0.4185 | 1 | Q8VE22 | 28S ribosomal protein S23, mitochondrial                                                       | Mrps23     | mmu:64656  |   |   |
| 117 | -0.4058 | -0.4831 | -0.1202 | -0.4122 | 1 | Q61112 | 45 kDa calcium-binding protein                                                                 | Sdf4       | mmu:20318  |   |   |
| 118 | -0.2854 | -0.1275 | -0.9671 | -0.4109 | 1 | Q61687 | Transcriptional regulator ATRX                                                                 | Atrx       | mmu:22589  |   |   |
| 119 | -0.0771 | -0.4594 | -0.3535 | -0.4010 | 1 | Q9JRK6 | Hypoxia up-regulated protein 1                                                                 | Hyou1      | mmu:12282  |   |   |
| 120 | -0.5297 | -0.3658 | -0.2262 | -0.3910 | 1 | P48754 | Breast cancer type 1 susceptibility protein homolog                                            | Brcal      | mmu:12189  | 1 | 1 |
| 121 | -0.4841 | -0.1750 | -0.3766 | -0.3835 | 1 | Q08528 | Hexokinase-Hexokinase-2                                                                        | Hk2        | mmu:15277  |   |   |
| 122 | -0.2911 | -0.0710 | -0.3056 | -0.3815 | 1 | Q8VWR5 | Transcriptional repressor p66-beta                                                             | Gata2b     | mmu:22542  |   |   |
| 123 | -0.1659 | -0.0641 | -0.1776 | -0.3797 | 1 | Q7TQI3 | Ubiquitin thioesterase OTUB1                                                                   | Otub1      | mmu:107260 |   |   |
| 124 | -0.7196 | -0.2776 | -0.2012 | -0.3759 | 1 | Q9Z2U1 | Proteasome subunit alpha type-2;Proteasome subunit alpha type-5                                | Gm3894;P   | mmu:26442  |   |   |
| 125 | -0.1401 | -0.6566 | -0.2564 | -0.3735 | 1 | Q9JHK4 | Geranylgeranyl transferase type-2 subunit alpha                                                | Rabgta     | mmu:56187  |   |   |
| 126 | -0.3678 | -0.4243 | -0.4214 | -0.3711 | 1 | Q14CH7 | Alanine-tRNA ligase, mitochondrial                                                             | Aars2      | mmu:224805 |   |   |
| 127 | -0.3625 | -0.3932 | -0.4787 | -0.3599 | 1 | P70404 | Isocitrate dehydrogenase [NAD] subunit gamma 1, mitochondrial                                  | Idh3g      | mmu:15929  |   |   |
| 128 | -0.2242 | -0.4157 | -0.2774 | -0.3565 | 1 | Q54724 | Polymerase I and transcript release factor                                                     | Ptrf       | mmu:19285  |   |   |
| 129 | -0.0331 | -0.1784 | -0.0371 | -0.3503 | 1 | Q9CQ36 | DNA polymerase epsilon subunit 4                                                               | Pole4      | mmu:66979  |   |   |
| 130 | -0.1417 | -0.3225 | -0.2912 | -0.3469 | 1 | Q88171 | Nuclear pore complex protein Nup93                                                             | Nup93      | mmu:71805  |   |   |
| 131 | -0.7525 | -0.1256 | -0.4337 | -0.3433 | 1 | Q88MD8 | Calcium-binding mitochondrial carrier protein ScaMC-1                                          | Sc25a24    | mmu:229731 | 1 |   |
| 132 | -0.3723 | -0.1713 | -0.1582 | -0.3408 | 1 | Q80WQ2 | Protein VAC14 homolog                                                                          | Vac14      | mmu:234729 |   |   |
| 133 | -0.4840 | -0.4099 | -0.2801 | -0.3412 | 1 | Q9CYN9 | Renin receptor                                                                                 | Atg6a2     | mmu:70495  |   |   |
| 134 | -0.3699 | -0.2534 | -0.1521 | -0.3231 | 1 | Q099K9 | Probable histidine-tRNA ligase, mitochondrial                                                  | Hars2      | mmu:70791  |   |   |
| 135 | -0.2191 | -0.9102 | -0.1077 | -0.3217 | 1 | P33610 | DNA primase large subunit                                                                      | Prim2      | mmu:19076  |   |   |
| 136 | -0.1876 | -0.0401 | -0.5247 | -0.3157 | 1 | Q89116 | Vesicle transport through interaction with t-SNAREs homolog 1A                                 | Vti1a      | mmu:53611  |   |   |
| 137 | -0.1632 | -0.4735 | -0.2998 | -0.3103 | 1 | Q9ER88 | 28S ribosomal protein S29, mitochondrial                                                       | Dap3       | mmu:65111  |   | 1 |
| 138 | -0.0425 | -0.1583 | -0.2471 | -0.2946 | 1 | Q099X1 | Myeloid leukemia factor 2                                                                      | Mlf2       | mmu:30853  |   |   |
| 139 | -0.0793 | -0.0965 | -0.2103 | -0.2903 | 1 | Q9QYI4 | DnaJ homolog subfamily B member 12                                                             | Dnajb12    | mmu:56709  |   |   |
| 140 | -0.1587 | -0.1567 | -0.4086 | -0.2802 | 1 | Q09182 | Dehydrogenase/reductase SDR family member 4                                                    | Dhrs4      | mmu:28200  |   |   |
| 141 | -0.1459 | -0.1537 | -0.1032 | -0.2748 | 1 | P64514 | Tripeptidyl-peptidase 2                                                                        | Tpp2       | mmu:222019 |   |   |
| 142 | -0.0807 | -0.3764 | -0.1145 | -0.2659 | 1 | Q88807 | Protein bicucullin D homolog 1                                                                 | Bicd1      | mmu:12121  |   |   |
| 143 | -0.5990 | -0.2289 | -0.1264 | -0.2581 | 1 | Q9Z1Q5 | Chloride intracellular channel protein 1                                                       | Clic1      | mmu:114584 |   |   |
| 144 | -0.1017 | -0.5433 | -0.0857 | -0.2570 | 1 | Q8R317 | Ubiquitin-1                                                                                    | Ublqnl1    | mmu:56085  |   |   |
| 145 | -0.3235 | -0.0181 | -0.3598 | -0.2528 | 1 | Q09113 | 3-hydroxyisobutyrate dehydrogenase, mitochondrial                                              | Hibadh     | mmu:58875  |   |   |
| 146 | -0.2239 | -0.1307 | -0.1904 | -0.2490 | 1 | P97868 | E3 ubiquitin-protein ligase RBBP6                                                              | Rbbp6      | mmu:19647  |   | 1 |
| 147 | -0.4556 | -0.3287 | -0.1374 | -0.2476 | 1 | Q9JIG9 | Nitric oxide-associated protein 1                                                              | Noa1       | mmu:56412  |   |   |
| 148 | -0.3628 | -0.1484 | -0.2318 | -0.2239 | 1 | Q9Q8D0 |                                                                                                | Dnajc21    | mmu:78244  |   |   |
| 149 | -0.1070 | -0.0961 | -0.4161 | -0.2222 | 1 | Q55XY1 | Cytosin-B                                                                                      | Specc1     | mmu:14232  |   |   |
| 150 | -0.1756 | -0.1109 | -0.3297 | -0.2221 | 1 | Q35465 | Peptidyl-prolyl cis-trans isomerase FKBP8                                                      | Fkbp8      | mmu:14232  |   |   |
| 151 | -0.0138 | -0.0938 | -0.7185 | -0.2220 | 1 | Q7TMY8 | E3 ubiquitin-protein ligase HUWE1                                                              | Huwe1      | mmu:59026  |   | 1 |
| 152 | -0.0282 | -0.2691 | -0.1439 | -0.2047 | 1 | Q8C388 | von Willebrand factor A domain-containing protein 8                                            | Vwa8       | mmu:219189 |   |   |
| 153 | -0.1201 | -0.2430 | -0.1475 | -0.2072 | 1 | Q60875 | Rho guanine nucleotide exchange factor 2                                                       | Arhgef2    | mmu:16800  |   |   |
| 154 | -0.3924 | -0.1755 | -0.1012 | -0.2012 | 1 | Q88N14 | Derlin-2                                                                                       | Der12      | mmu:116891 |   |   |
| 155 | -0.0968 | -0.2084 | -0.2869 | -0.2004 | 1 | Q9Z110 | Delta-1-pyrroline 5-carboxylate synthase;Glutamate 5-kinase;Gamma-glutamyl phosphate reductase | Aldh18a1   | mmu:56454  |   |   |
| 156 | -0.0668 | -0.1279 | -0.2813 | -0.1963 | 1 | Q8K2Y7 | 39S ribosomal protein L47, mitochondrial                                                       | Mrlp47     | mmu:74600  |   |   |
| 157 | -0.1022 | -0.0264 | -0.1035 | -0.1879 | 1 | P02468 | Laminin subunit gamma-1                                                                        | Lamc1      | mmu:19647  |   |   |
| 158 | -0.0556 | -0.2927 | -0.1443 | -0.1650 | 1 | Q3U9G9 | Lamin-B receptor                                                                               | Lbr        | mmu:98386  |   |   |
| 159 | -0.1015 | -0.1427 | -0.2338 | -0.1634 | 1 | P08775 | DNA-directed RNA polymerase II subunit RP81                                                    | Polr2a     | mmu:20020  |   |   |
| 160 | -0.0890 | -0.0567 | -0.2303 | -0.1607 | 1 | P54729 | NEDD8 ultimate buster 1                                                                        | Nub1       | mmu:53312  |   |   |
| 161 | -0.1074 | -0.0616 | -0.3513 | -0.1575 | 1 | Q9G677 |                                                                                                | Utrn       | mmu:22288  |   |   |
| 162 | -0.0444 | -0.0511 | -0.1365 | -0.1497 | 1 | P32067 | Lupus La protein homolog                                                                       | Lsb        | mmu:20823  |   |   |
| 163 | -0.0759 | -0.0361 | -0.0386 | -0.1490 | 1 | Q80YI3 | 2-deoxydeoxyribose 5-phosphate N-hydrolase 1                                                   | Dnph1      | mmu:381101 |   |   |
| 164 | -0.2048 | -0.0331 | -0.1332 | -0.1474 | 1 | Q3TWF6 | WD repeat-containing protein 70                                                                | Wdr70      | mmu:50927  |   |   |
| 165 | -0.1189 | -0.0111 | -0.0732 | -0.1446 | 1 | Q99MD9 | Nuclear autoantigenic sperm protein                                                            | Nasp       | mmu:29875  |   |   |
| 166 | -0.0664 | -0.1284 | -0.0720 | -0.0857 | 1 | Q9JWK1 | Ras GTPase-activating-like protein IQGAP1                                                      | Iqgap1     | mmu:22319  |   |   |
| 167 | -0.0543 | -0.0836 | -0.2700 | -0.1056 | 1 | P63024 | Vesicle-associated membrane protein 3                                                          | Vamp3      | mmu:228359 |   |   |
| 168 | -0.0543 | -0.0836 | -0.2700 | -0.1056 | 1 | Q5FWK3 | Rho GTPase-activating protein 1                                                                | Arhgap1    | mmu:245474 |   |   |
| 169 | -0.1315 | -0.1322 | -0.1315 | -0.1079 | 1 | Q9E5X5 | H/ACA ribonucleoprotein complex subunit 4                                                      | Dkl1       | mmu:67655  | 1 |   |
| 170 | -0.2955 | -0.0330 | -0.1670 | -0.1441 | 1 | Q7T5G2 | RNA polymerase II subunit A C-terminal domain phosphatase                                      | Ctdp1      | mmu:21402  |   |   |
| 171 | -0.2415 | -0.0330 | -0.1670 | -0.1441 | 1 | Q9GKX0 | Microtubule-actin cross-linking factor 1                                                       | Mafk1      | mmu:28006  |   |   |
| 172 | -0.0598 | -0.1342 | -0.2670 | -0.1342 | 1 | Q6P6L7 | WASH complex subunit FAM21                                                                     | Fam21      | mmu:19777  |   |   |
| 173 | -0.0859 | -0.2675 | -0.1246 | -0.1343 | 1 | Q3T1Q5 | Unconventional prefolin RP85 interactor                                                        | Urr1       | mmu:18968  |   |   |
| 174 | -0.1709 | -0.1996 | -0.0636 | -0.1363 | 1 | P33609 | DNA polymerase alpha catalytic subunit                                                         | Pola1      | mmu:21356  |   |   |
| 175 | -0.1580 | -0.1075 | -0.3029 | -0.1424 | 1 | Q9R233 | Tapasin                                                                                        | Tapbp      | mmu:109711 |   |   |
| 176 | -0.1153 | -0.3082 | -0.0652 | -0.1447 | 1 | Q7TPR4 | Alpha-actinin-1                                                                                | Actn1      | mmu:17850  |   |   |
| 177 | -0.2906 | -0.0330 | -0.1670 | -0.1441 | 1 | P16332 | Methylmalonyl-CoA mutase, mitochondrial                                                        | Mut        | mmu:63958  |   | 1 |
| 178 | -0.1441 | -0.0330 | -0.1670 | -0.1441 | 1 | Q9E500 | Ubiquitin conjugation factor E4 B                                                              | Ube4b      | mmu:14828  |   |   |
| 179 | -0.1571 | -0.1502 | -0.1504 | -0.1539 | 1 | P20029 | 78 kDa glucose-regulated protein                                                               | Hspa5      | mmu:27967  |   |   |
| 180 | -0.1717 | -0.0668 | -0.2858 | -0.1634 | 1 | Q8CG20 | Calcium homeostasis endoplasmic reticulum protein                                              | Cherp      | mmu:217869 |   |   |
| 181 | -0.1399 | -0.1719 | -0.0387 | -0.1680 | 1 | P59235 | Eukaryotic translation initiation factor 5                                                     | Eif5       | mmu:14670  |   |   |
| 182 | -0.1607 | -0.1453 | -0.1623 | -0.1623 | 1 | P36316 | Guanine nucleotide-binding protein-like 1                                                      | Gnl1       | mmu:11641  |   |   |
| 183 | -0.1659 | -0.0408 | -0.1794 | -0.1673 | 1 | Q5A931 | A-kinase anchor protein 2                                                                      | Akap2      | mmu:66508  |   |   |
| 184 | -0.0727 | -0.1121 | -0.0727 | -0.1682 | 1 | Q9CQ22 | Regulator of complex protein LAMTOR1                                                           | Lamtor1    | mmu:208768 |   |   |
| 185 | -0.0604 | -0.0408 | -0.0755 | -0.1740 | 1 | P46471 | 26S protease regulatory subunit 7                                                              | Psmc2      | mmu:18972  |   |   |
| 186 | -0.0553 | -0.2857 | -0.2694 | -0.1779 | 1 | Q35654 | DNA polymerase delta subunit 2                                                                 | Pold2      | mmu:54138  |   |   |
| 187 | -0.1179 | -0.2846 | -0.3158 | -0.1844 | 1 | Q8K1J5 | Protein SDE2 homolog                                                                           | Sde2       | mmu:71919  |   |   |
| 188 | -0.1214 | -0.0330 | -0.1670 | -0.1870 | 1 | P28658 | Ataxin-10                                                                                      | Atxn10     | mmu:21402  |   | 1 |
| 189 | -0.0698 | -0.3562 | -0.1542 | -0.1880 | 1 | Q9D706 | RNA polymerase II-associated protein 3                                                         | Rpap3      | mmu:56194  |   |   |
| 190 | -0.1779 | -0.4755 | -0.2251 | -0.1941 | 1 | Q9W1X5 | S-phase kinase-associated protein 1                                                            | Skp1       | mmu:21402  |   |   |
| 191 | -0.1578 | -0.3525 | -0.2251 | -0.1942 | 1 | Q9R1C7 | Pre-mRNA-processing factor 40 homolog A                                                        | Pprf40a    | mmu:56194  |   |   |
| 192 | -0.1852 | -0.0330 | -0.1670 | -0.1950 | 1 | Q11011 | Puromycin-sensitive aminopeptidase                                                             | Npepps     | mmu:21915  |   |   |
| 193 | -0.0330 | -0.3008 | -0.0937 | -0.2008 | 1 | P59328 | WD repeat and HMG-box DNA-binding protein 1                                                    | Wdrh1      | mmu:218973 |   |   |
| 194 | -0.3096 | -0.1584 | -0.0720 | -0.2039 | 1 | P62259 | 14-3-3 protein epsilon                                                                         | Ywhae      | mmu:22627  |   |   |
| 195 | -0.1655 | -0.5722 | -0.0867 | -0.2098 | 1 | Q61249 | Immunoglobulin-binding protein 1                                                               | Ilgp1      | mmu:18518  |   |   |
| 196 | -0.1378 | -0.2313 | -0.0609 | -0.2110 | 1 | Q8CIE6 | Coatomer subunit alpha;Coatomer subunit alpha;Xenin;Proxenin                                   | Copa       | mmu:12847  |   |   |
| 197 | -0.1814 | -0.4764 | -0.1752 | -0.2131 | 1 | P42208 | Septin-2                                                                                       | Sept2      | mmu:18000  |   |   |
| 198 | -0.1683 | -0.0649 | -0.4548 | -0.2164 | 1 | P80315 | T-complex protein 1 subunit delta                                                              | Cct4       | mmu:12464  |   |   |
| 199 | -0.2335 | -0.0330 | -0.1670 | -0.2179 | 1 | Q9Z120 | General vesicular transport factor p115                                                        | Uso1       | mmu:56041  |   |   |
| 200 | -0.1062 | -0.1095 | -0.1913 | -0.2179 | 1 | Q9R190 | Metastasis-associated protein MTA2                                                             | Mta2       | mmu:23942  |   |   |
| 201 | -0.0330 | -0.0720 | -0.0688 | -0.2167 | 1 | P46638 | Ras-related protein Rab-11B                                                                    | Rab11b;Ra  | mmu:19326  |   |   |
| 202 | -0.0735 | -0.2954 | -0.0285 | -0.2489 | 1 | Q6IRU2 | Tropomyosin alpha-4 chain                                                                      | Tpm4       | mmu:23997  |   |   |
| 203 | -0.3143 | -0.1155 | -0.0556 | -0.2233 | 1 | Q8C7K2 | ER membrane protein complex subunit 1                                                          | Emc1       | mmu:230866 |   |   |
| 204 | -0.2849 | -0.0330 | -0.2547 | -0.2242 | 1 | Q9EQH3 | Vacuolar protein sorting-associated protein 35                                                 | Vps35      | mmu:65114  |   |   |
| 205 | -0.1751 | -0.2321 | -0.4842 | -0.2246 | 1 | Q9D8C7 | cAMP-dependent protein kinase type I-alpha regulatory subunit;cAMP-dependent protein kinase I  | Pkr1a      | mmu:19084  |   |   |
| 206 | -0.1815 | -0.1244 | -0.4701 | -0.2255 | 1 | Q9CPR5 | 39S ribosomal protein L15, mitochondrial                                                       | Mrlp15     | mmu:27395  |   |   |
| 207 | -0.0174 | -0.7789 | -0.0675 | -0.2259 | 1 | Q61686 | Chromobox protein homolog 5                                                                    | Cbx5       | mmu:12419  |   |   |
| 208 | -0.3422 | -0.0475 | -0.0923 | -0.2270 | 1 | P62876 | DNA-directed RNA polymerases I, II, and III subunit RPABCS                                     | Usp50;Polr | mmu:66491  |   |   |
| 209 | -0.2318 | -0.4274 | -0.2043 | -0.2275 | 1 | Q3THK3 | General transcription factor IIF subunit 1                                                     | Gtf2f1     | mmu:98053  |   |   |
| 210 | -0.2730 | -0.0668 | -0.2021 | -0.2340 | 1 | P61161 | Actin-related protein 2                                                                        | Actr2      | mmu:66713  |   |   |
| 211 | -0.5542 | -0.1822 | -0.3212 | -0.2380 | 1 | P56299 | Ubiquitin carboxyl-terminal hydrolase;Ubiquitin carboxyl-terminal hydrolase 5                  | Usp5       | mmu:22225  |   |   |
| 212 | -0.5899 | -0.0330 | -0.1670 | -0.2385 | 1 | Q35685 | Nuclear migration protein nudc                                                                 | Nudc       | mmu:18221  |   |   |
| 213 | -0.2377 | -0.0436 | -0.2924 | -0.2357 | 1 | Q09K01 | Pyridoxal-dependent decarboxylase domain-containing protein 1                                  | Pdxd1      | mmu:94184  |   |   |
| 214 | -0.3796 | -0.0330 | -0.1670 | -0.2375 | 1 | Q92426 | Exportin-6                                                                                     | Xpo6       | mmu:74204  |   |   |
| 215 | -0.1179 | -0.0855 | -0.2166 | -0.2375 | 1 | P63101 | 14-3-3 protein zeta/delta                                                                      | Ywhaz      | mmu:22631  |   | 1 |
| 216 | -0.0706 | -0.2885 | -0.4753 | -0.2378 | 1 | Q9DCH4 | Eukaryotic translation initiation factor 3 subunit F                                           | Eif3f      | mmu:66085  |   |   |
| 217 | -0.3118 | -0.2738 | -0.2158 | -0.2416 | 1 | Q9D8G3 | AP-2 complex subunit beta;AP complex subunit beta                                              | Ap2b1      | mmu:71770  |   |   |
| 218 | -0.1598 | -0.0631 | -0.1897 | -0.2437 | 1 | P46935 | E3 ubiquitin-protein ligase NEDD4                                                              | Nedd4      | mmu:17999  |   | 1 |
| 219 | -0.0974 | -0.5129 | -0.1280 | -0.2469 | 1 | Q5D7T8 | Paraneoplastic antigen-like protein 5                                                          | Pnma5      | mmu:385377 |   |   |
| 220 | -0.3688 | -0.1448 | -0.3924 | -0.2476 | 1 | Q61768 | Kinesin-1 heavy chain;Kinesin-like protein                                                     | Kif5b      | mmu:16573  |   |   |
| 221 | -0.4051 | -0.1322 | -0.1016 |         |   |        |                                                                                                |            |            |   |   |

|     |        |        |        |        |   |            |                                                                                                           |             |               |   |
|-----|--------|--------|--------|--------|---|------------|-----------------------------------------------------------------------------------------------------------|-------------|---------------|---|
| 242 | 0.4511 | 0.0636 | 0.2189 | 0.2960 | 1 | Q8BY87     | Ubiquitin carboxyl-terminal hydrolase 47                                                                  | Usp47       | mmu:74996     |   |
| 243 | 0.0737 | 0.7849 | 0.1408 | 0.2969 | 1 | Q8CH18     | Cell division cycle and apoptosis regulator protein 1                                                     | Ccar1       | mmu:67500     |   |
| 244 | 0.0000 | 0.5542 | 0.1897 | 0.2978 | 1 | Q6PIU9     | Uncharacterized protein FU45252 homolog                                                                   |             | mmu:102637099 |   |
| 245 | 0.2421 | 0.4243 | 0.0657 | 0.3003 | 1 | Q8CHQ8     | F-box only protein 4                                                                                      | Fbxo4       | mmu:106052    | 1 |
| 246 | 0.4947 | 0.1374 | 0.0534 | 0.3041 | 1 | Q9EQC8     |                                                                                                           | Prcr        | mmu:94315     |   |
| 247 | 0.0878 | 1.0102 | 0.0588 | 0.3066 | 1 | Q9PFR5     | Transformer-2 protein homolog alpha                                                                       | Tra2a       |               |   |
| 248 | 0.4367 | 0.1668 | 0.2723 | 0.3085 | 1 | Q8UUG5     | Septin-9                                                                                                  | Sept9       | mmu:53860     |   |
| 249 | 0.4224 | 0.6282 | 0.1152 | 0.3090 | 1 | Q04887     | Transcription factor SOX-9                                                                                | Sox9        | mmu:20682     |   |
| 250 | 0.0059 | 0.5421 | 0.1953 | 0.3101 | 1 | B1A0RD6    |                                                                                                           | Sfrn9       | mmu:237886    |   |
| 251 | 0.4865 | 0.1928 | 0.2213 | 0.3106 | 1 | Q921M4     | Golgin subfamily A member 2                                                                               | Golga2      | mmu:99412     |   |
| 252 | 0.5017 | 0.4210 | 0.2514 | 0.3136 | 1 | P62317     | Serine/threonine-protein phosphatase PP1-alpha catalytic subunit                                          | Ppp1ca      | mmu:19045     | 1 |
| 253 | 0.3088 | 0.4016 | 0.1372 | 0.3153 | 1 | Q9EPU0     | Regulator of nonsense transcripts 1                                                                       | Upf1u       | mmu:19704     |   |
| 254 | 0.4233 | 0.0715 | 0.0000 | 0.3174 | 1 | Q8BUK6     | Protein Hook homolog 3                                                                                    | Hook3       | mmu:320191    |   |
| 255 | 0.0973 | 0.0938 | 0.4503 | 0.3183 | 1 | P49443     | Protein phosphatase 1A                                                                                    | Ppm1a       | mmu:19042     | 1 |
| 256 | 0.0058 | 0.1519 | 0.5567 | 0.3220 | 1 | Q923E4     | NAD-dependent protein deacetylase sirtuin-1;Sirt1 75 kDa fragment                                         | Sirt1       | mmu:93759     | 1 |
| 257 | 0.0000 | 0.5268 | 0.1377 | 0.3221 | 1 | Q91Z38     | Tetratricopeptide repeat protein 1                                                                        | Ttrc1       | mmu:66827     |   |
| 258 | 0.4048 | 0.1275 | 0.2562 | 0.3235 | 1 | P58871     | 182 kDa tankyrase-1-binding protein                                                                       | Tnks1bp1    | mmu:228140    |   |
| 259 | 0.3006 | 0.0000 | 0.3413 | 0.3279 | 1 | P63321     | Ras-related protein Ral-A                                                                                 | Rala        | mmu:56044     |   |
| 260 | 0.4386 | 0.6495 | 0.0234 | 0.3300 | 1 | Q920U1     | Tight junction protein ZO-2                                                                               | Tjp2        | mmu:21873     |   |
| 261 | 0.6284 | 0.0700 | 0.1101 | 0.3392 | 1 | Q9C1T0     | Ran-binding protein 3                                                                                     | Ranbp3      | mmu:71810     |   |
| 262 | 0.0615 | 0.2221 | 0.6104 | 0.3397 | 1 | Q99KL7     | Ras-related protein Rab-28                                                                                | Rab28       | mmu:100972    |   |
| 263 | 0.1108 | 0.3700 | 0.7527 | 0.3404 | 1 | Q9DBR7     | Protein phosphatase 1 regulatory subunit 12A                                                              | Ppp1r12a    | mmu:17931     |   |
| 264 | 0.4552 | 0.1132 | 0.5105 | 0.3405 | 1 | Q8C194     | Glycogen phosphorylase, brain form                                                                        | PygB        | mmu:110078    |   |
| 265 | 0.4808 | 0.0938 | 0.4090 | 0.3408 | 1 | Q9C204     | COP9 signalosome complex subunit 7a                                                                       | Cops7a      | mmu:26894     |   |
| 266 | 0.8126 | 0.3051 | 0.2439 | 0.3489 | 1 | Q692X6     | MORC family CW-type zinc finger protein 2A                                                                | Morc2a      | mmu:74522     |   |
| 267 | 0.6688 | 0.3652 | 0.0427 | 0.3497 | 1 | Q2A2C19    | RNA polymerase-associated protein RTF1 homolog                                                            | RT1         | mmu:76246     |   |
| 268 | 0.1069 | 0.1081 | 0.0000 | 0.3536 | 1 | Q99MM1     | Lysine-HRNA ligase                                                                                        | Kars        | mmu:85305     |   |
| 269 | 0.0586 | 0.2243 | 0.4069 | 0.3545 | 1 | Q8BUU0     | Small glutamine-rich tetratricopeptide repeat-containing protein alpha                                    | Sgta        | mmu:52551     |   |
| 270 | 0.1997 | 0.3422 | 0.3776 | 0.3548 | 1 | Q9CQV8     | 14-3-3 protein beta/alpha;14-3-3 protein beta/alpha, N-terminally processed                               | Ywhab       | mmu:54401     |   |
| 271 | 0.3144 | 0.0635 | 0.0000 | 0.3573 | 1 | Q55514     | Active breakpoint cluster region-related protein                                                          | Abr         | mmu:109934    |   |
| 272 | 0.0435 | 0.5214 | 0.0000 | 0.3680 | 1 | Q35245     | Polycystin-2                                                                                              | Pkd2        | mmu:18764     |   |
| 273 | 0.4858 | 0.2081 | 0.4593 | 0.3688 | 1 | Q9CZ15     | DNA replication complex GINS protein PSF1                                                                 | Gins1       | mmu:69270     |   |
| 274 | 0.1583 | 0.2684 | 0.4364 | 0.3714 | 1 | Q9CWM4     | Prefoldin subunit 1                                                                                       | Pfdn1       |               |   |
| 275 | 0.1256 | 0.4436 | 0.3788 | 0.3717 | 1 | Q8OX50     | Ubiquitin-associated protein 2-like                                                                       | Ubp2l       | mmu:74383     |   |
| 276 | 0.7989 | 0.1470 | 0.0000 | 0.3746 | 1 | Q9DC12     | MIP18 family protein FAM96A                                                                               | Fam96a      | mmu:68250     |   |
| 277 | 0.2191 | 0.5858 | 0.3210 | 0.3756 | 1 | Q92266     | SNARE-associated protein Snapin                                                                           | Snapin      | mmu:20615     |   |
| 278 | 0.5829 | 0.0976 | 0.3761 | 0.3752 | 1 | Q71552     | Ubiquitin-conjugating enzyme E2 C11                                                                       | Ubc2l1      | mmu:70093     | 1 |
| 279 | 0.3227 | 0.0000 | 0.0840 | 0.3786 | 1 | Q9C3X0     | Protein YF1B                                                                                              | Yf1b        | mmu:77254     |   |
| 280 | 0.2434 | 0.5337 | 0.2358 | 0.3803 | 1 | Q8C0N6     | Thioredoxin-like protein 1                                                                                | Txn1l       | mmu:53382     | 1 |
| 281 | 0.0000 | 0.5128 | 0.1095 | 0.3810 | 1 | A2A8Z1     | Oxysterol-binding protein;Oxysterol-binding protein-related protein 9                                     | Osbpl9      | mmu:100273    |   |
| 282 | 0.5126 | 0.3942 | 0.3865 | 0.3817 | 1 | Q99P22     | Opioid growth factor receptor                                                                             | Ogfr        | mmu:72075     |   |
| 283 | 0.0593 | 0.0798 | 0.2609 | 0.3843 | 1 | Q9QWF0     | Chromatin assembly factor 1 subunit A                                                                     | Chaf1a      | mmu:27221     |   |
| 284 | 0.0132 | 0.4020 | 0.4618 | 0.3844 | 1 | Q3U7U3     | F-box only protein 7                                                                                      | Fbxo7       | mmu:69754     | 1 |
| 285 | 0.1338 | 0.7091 | 0.2381 | 0.3846 | 1 | Q61210     | Rho guanine nucleotide exchange factor 1                                                                  | Arhgef1     | mmu:16801     |   |
| 286 | 0.0000 | 0.3553 | 0.0000 | 0.3857 | 1 | Q6E185     | ATP synthase subunit e, mitochondrial                                                                     | Atps1       | mmu:11958     |   |
| 287 | 0.7023 | 0.3141 | 0.4086 | 0.3897 | 1 | Q97C23     |                                                                                                           | Tpm3        |               |   |
| 288 | 0.5241 | 0.0994 | 0.1946 | 0.3896 | 1 | Q9DB83     | Charged multivesicular body protein 4b                                                                    | Chmp4b      | mmu:75608     |   |
| 289 | 0.0636 | 0.0564 | 0.6410 | 0.3896 | 1 | Q6PER3     | Microtubule-associated protein RP/EB family member 3                                                      | Mapre3      | mmu:100732    |   |
| 290 | 0.7009 | 0.2790 | 0.5156 | 0.3942 | 1 | P68254     | 14-3-3 protein theta                                                                                      | Ywhaq       | mmu:22630     |   |
| 291 | 0.7132 | 0.4156 | 0.0000 | 0.3965 | 1 | Q9D7M8     | DNA-directed RNA polymerase II subunit RPB4                                                               | Polr2d      | mmu:69241     |   |
| 292 | 0.3281 | 0.1147 | 0.6545 | 0.4084 | 1 | Q99PL5     | Ribosome-binding protein 1                                                                                | Rbp1        | mmu:81910     |   |
| 293 | 0.7046 | 0.3506 | 0.0538 | 0.4112 | 1 | Q8CHU3     | Epin-2                                                                                                    | Epn2        | mmu:13855     |   |
| 294 | 0.3034 | 0.3624 | 0.7846 | 0.4118 | 1 | Q70194     | Eukaryotic translation initiation factor 3 subunit D                                                      | Eif3d       | mmu:55944     |   |
| 295 | 0.3828 | 0.1046 | 0.6141 | 0.4157 | 1 | Q60967     | Bifunctional 3-phosphoadenosine 5-phosphosulfate synthase 1;Sulfate adenylyltransferase;Adenylyl          | Paps1       | mmu:23971     |   |
| 296 | 0.4875 | 0.0000 | 0.2524 | 0.4162 | 1 | Q8QYD1     | ATP-dependent RNA helicase SUPV3L1, mitochondrial                                                         | Supv3l1     | mmu:338359    |   |
| 297 | 0.0000 | 0.1333 | 0.7596 | 0.4176 | 1 | Q92696     | Heat shock 70 kDa protein 1A;Heat shock 70 kDa protein 1B                                                 | Ywhaj;Hsp70 | mmu:193740    | 1 |
| 298 | 0.0000 | 0.2921 | 0.7416 | 0.4184 | 1 | Q3U3Y4     | Uncharacterized protein C12orf43 homolog                                                                  |             | mmu:72357     |   |
| 299 | 0.7492 | 0.0534 | 0.4087 | 0.4233 | 1 | Q8QX73     | Protein pelota homolog                                                                                    | Pelo        | mmu:105083    |   |
| 300 | 0.3017 | 0.1279 | 0.5874 | 0.4259 | 1 | P47713     | Cytosolic phospholipase A2;Phospholipase A2;Lysophospholipase                                             | Pla2g4a     | mmu:18783     |   |
| 301 | 0.3618 | 0.2226 | 0.5308 | 0.4287 | 1 | Q9DCD5     | Tight junction-associated protein 1                                                                       | Tjp1        | mmu:74094     |   |
| 302 | 0.4876 | 0.0653 | 0.6183 | 0.4330 | 1 | Q9DBN0     | Elongation factor 1-gamma                                                                                 | Eef1g       | mmu:67160     |   |
| 303 | 0.3511 | 0.7089 | 0.4994 | 0.4431 | 1 | Q61166     | Microtubule-associated protein RP/EB family member 1                                                      | Mapre1      | mmu:13589     |   |
| 304 | 0.1394 | 0.0000 | 0.5678 | 0.4431 | 1 | P07901     | Heat shock protein HSP 90-alpha                                                                           | Hsp90aa1    | mmu:15519     | 1 |
| 305 | 0.0000 | 0.3885 | 0.5620 | 0.4434 | 1 | Q05044     | Eukaryotic translation initiation factor 5B                                                               | Eif5b       | mmu:226982    |   |
| 306 | 0.2177 | 0.1399 | 0.4855 | 0.4482 | 1 | P11499     | Heat shock protein HSP 90-beta                                                                            | Hsp90ab1    | mmu:15516     |   |
| 307 | 0.1577 | 0.6545 | 0.4505 | 0.4505 | 1 | Q8QYR7     | Claspin                                                                                                   | Cspn        | mmu:269582    |   |
| 308 | 0.7770 | 0.1044 | 0.4589 | 0.4509 | 1 | P61082     | 14-3-3 protein gamma;14-3-3 protein gamma, N-terminally processed                                         | Ywhag       | mmu:21623     |   |
| 309 | 0.2049 | 0.2872 | 0.2390 | 0.4514 | 1 | Q8BMU0     | F-box only protein 38                                                                                     | Fbxo38      | mmu:107035    |   |
| 310 | 0.8474 | 0.5491 | 0.2305 | 0.4545 | 1 | Q3UGC7     | Eukaryotic translation initiation factor 3 subunit 1-A;Eukaryotic translation initiation factor 3 subunit | Eif3j;Eif3k | mmu:78655     |   |
| 311 | 0.1919 | 0.2688 | 0.5012 | 0.4558 | 1 | Q9CY18     | Sorting nexin-7                                                                                           | Snx7        |               |   |
| 312 | 0.4428 | 0.2265 | 0.4694 | 0.4599 | 1 | Q8QTH2     | Protein LAP2                                                                                              | Erb2ip      | mmu:59079     |   |
| 313 | 0.4957 | 0.5405 | 0.4174 | 0.4636 | 1 | Q3U0D6     | Ubiquitin carboxyl-terminal hydrolase;Ubiquitin carboxyl-terminal hydrolase 19                            | Usp19       | mmu:71472     |   |
| 314 | 0.1995 | 0.3857 | 0.0581 | 0.4711 | 1 | P51949     | CDK-activating kinase assembly factor MAT1                                                                | Mnat1       | mmu:17420     |   |
| 315 | 0.9709 | 0.2280 | 0.1786 | 0.4740 | 1 | A0A0RAJ205 |                                                                                                           |             | mmu:108943    |   |
| 316 | 0.6271 | 0.7749 | 0.3967 | 0.4747 | 1 | Q8BH58     | F-box-like/WD repeat-containing protein TBL1XR1                                                           | Tbl1xr1     | mmu:81004     |   |
| 317 | 0.3412 | 0.7171 | 0.1272 | 0.4752 | 1 | Q9D9F5     | Replication factor C subunit 5                                                                            | Rfc5        | mmu:72151     |   |
| 318 | 0.0000 | 0.6864 | 0.1929 | 0.4782 | 1 | Q6P3K7     | Histone deacetylase 10                                                                                    | Hdac10      | mmu:170787    |   |
| 319 | 0.5256 | 0.4603 | 0.4715 | 0.4963 | 1 | Q8C650     | Septin-10                                                                                                 | Sept10      | mmu:103080    |   |
| 320 | 0.0000 | 0.5525 | 0.8992 | 0.4969 | 1 | Q55VQ0     | Histone acetyltransferase KAT7                                                                            | Kat7        | mmu:217127    |   |
| 321 | 0.1714 | 0.0000 | 0.0938 | 0.4975 | 1 | E9Q368     |                                                                                                           | Gm17296     | mmu:212728    |   |
| 322 | 0.0000 | 0.4119 | 1.1766 | 0.4984 | 1 | D08553     | Dihydropyrimidinase-related protein 2                                                                     | Dpsyl2      | mmu:12934     |   |
| 323 | 0.8056 | 0.6716 | 0.0736 | 0.4991 | 1 | Q9D6K7     | Tetratricopeptide repeat protein 33                                                                       | Ttrc33      | mmu:67515     |   |
| 324 | 0.2654 | 0.6811 | 0.4328 | 0.5025 | 1 | Q3THJ3     | Probable RNA-binding protein EIFLAD                                                                       | Eif1ad      | mmu:69860     |   |
| 325 | 0.2862 | 0.3453 | 0.3276 | 0.5099 | 1 | P59438     | Hermans-Pudlak syndrome 5 protein homolog                                                                 | Hps5        | mmu:246694    |   |
| 326 | 0.7206 | 0.1222 | 0.6671 | 0.5293 | 1 | Q9E8B0     | Synaptosomal-associated protein 29                                                                        | Snap29      | mmu:67474     |   |
| 327 | 0.0976 | 0.0000 | 0.6793 | 0.5270 | 1 | Q5ND34     | WD repeat-containing protein 81                                                                           | Wdr81       | mmu:192652    |   |
| 328 | 0.5477 | 0.2778 | 0.1385 | 0.5370 | 1 | P62386     | Ubiquitin-60S ribosomal protein L40;Ubiquitin;60S ribosomal protein L40;Ubiquitin-40S ribosomal           | Ubn8797;U   | mmu:21181     |   |
| 329 | 0.0709 | 0.0465 | 0.8172 | 0.5380 | 1 | Q8QY56     | Rabensyn-5                                                                                                | Rbsn        | mmu:78287     |   |
| 330 | 0.2584 | 0.5695 | 1.0257 | 0.5331 | 1 | Q8CHH9     | Septin-8                                                                                                  | Sept8       | mmu:20362     |   |
| 331 | 0.0751 | 0.4753 | 0.5118 | 0.5338 | 1 | Q07813     | Apoptosis regulator BAX                                                                                   | Bax         | mmu:12028     | 1 |
| 332 | 0.6548 | 0.4296 | 0.6800 | 0.5387 | 1 | Q6P9Q6     | FK506-binding protein 15;Peptidyl-prolyl cis-trans isomerase                                              | Fkbp15      | mmu:338355    |   |
| 333 | 0.2680 | 0.2104 | 0.4494 | 0.5423 | 1 | Q8BWW3     | Eukaryotic peptide chain release factor subunit 1                                                         | Etf1        | mmu:225363    |   |
| 334 | 0.0130 | 0.4014 | 1.0843 | 0.5452 | 1 | Q9EQ61     | Pescadillo homolog                                                                                        | Pes1        | mmu:64934     |   |
| 335 | 0.3894 | 0.2337 | 0.9777 | 0.5454 | 1 | Q9J4K8     | Endophilin-B1                                                                                             | Sg3glb1     | mmu:54673     | 1 |
| 336 | 0.0000 | 0.0000 | 0.1043 | 0.5545 | 1 | P61025     | Cyclin-dependent kinases regulatory subunit;Cyclin-dependent kinases regulatory subunit 1                 | Cks1b;rt;Ck | mmu:54124     |   |
| 337 | 0.3815 | 0.3104 | 0.1455 | 0.5623 | 1 | Q4KMM3     | Oxidation resistance protein 1                                                                            | Orv1        | mmu:170719    | 1 |
| 338 | 0.1675 | 0.0000 | 0.3262 | 0.5668 | 1 | Q9WVE8     | Protein kinase C and casein kinase substrate in neurons protein 2                                         | Pacsn2      | mmu:23970     |   |
| 339 | 0.6091 | 0.4367 | 0.3367 | 0.5677 | 1 | P29391     | Ferritin;Ferritin light chain 1                                                                           | Ftl1        |               |   |
| 340 | 0.5472 | 0.6429 | 0.4381 | 0.5714 | 1 | Q09044     | Synaptosomal-associated protein;Synaptosomal-associated protein 23                                        | Snap23      | mmu:20619     |   |
| 341 | 0.3634 | 0.3245 | 0.6225 | 0.5736 | 1 | Q6P549     | Phosphatidylinositol 3,4,5-trisphosphate 5-phosphatase 2                                                  | Inpp1       | mmu:16332     |   |
| 342 | 0.4677 | 0.2440 | 0.4120 | 0.5814 | 1 | A2AL55     | Rap1 GTPase-activating protein 1                                                                          | Rap1gap     | mmu:110351    |   |
| 343 | 0.2529 | 0.5962 | 0.4919 | 0.5847 | 1 | Q9JUL0     | CD2-associated protein                                                                                    | Cd2ap       | mmu:12488     |   |
| 344 | 0.2601 | 0.5743 | 0.5292 | 0.5855 | 1 | Q6ZPJ3     | E2/E3 hybrid ubiquitin-protein ligase UBE2O                                                               | Ube2o       | mmu:217342    | 1 |
| 345 | 0.2783 | 0.1310 | 0.4331 | 0.5920 | 1 | P53811     | Phosphatidylinositol transfer protein beta isoform                                                        | Ptprnb      | mmu:56305     |   |
| 346 | 0.6913 | 0.0000 | 0.1498 | 0.5998 | 1 | Q08848     | 60 kDa SS-A/Ro ribonucleoprotein                                                                          | Trove2      | mmu:20822     |   |
| 347 | 0.0000 | 0.6490 | 0.6892 | 0.5999 | 1 | Q8BWF7     | Lipoma-preferred partner homolog                                                                          | Lpp         | mmu:210126    |   |
| 348 | 0.7485 | 0.3528 | 0.8125 | 0.5970 | 1 | P21881     | Protein-glutamine gamma-glutamyltransferase 2                                                             | Tgm2        | mmu:21817     |   |
| 349 | 0.3730 | 0.1445 | 0.3565 | 0.6006 | 1 | Q55013     | Trafficking protein particle complex subunit 3                                                            | Trappc3     | mmu:27096     |   |
| 350 | 0.8777 | 0.4634 | 0.9791 | 0.6036 | 1 | Q9JUL0     | CTTNBP2 N-terminal-like protein                                                                           | Ctnnb       |               |   |

|     |        |        |        |        |   |         |                                                                                                      |             |            |   |   |
|-----|--------|--------|--------|--------|---|---------|------------------------------------------------------------------------------------------------------|-------------|------------|---|---|
| 369 | 0.1840 | 0.1059 | 1.0065 | 0.7111 | 1 | Q9EG05  | Collagen type IV alpha 3-binding protein                                                             | Col4A3bp    | mmu:68018  |   |   |
| 370 | 1.0458 | 0.7088 | 0.7016 | 0.7226 | 1 | Q8R001  | Microtubule-associated protein RP/EB family member 2                                                 | Mapre2      | mmu:212307 |   |   |
| 370 | 0.3957 | 1.3379 | 0.5793 | 0.7400 | 1 | Q89032  | SH3 and PX domain-containing protein 2A                                                              | Sh3pxd2a    | mmu:14218  |   |   |
| 371 | 0.1925 | 0.0454 | 0.7312 | 0.7472 | 1 | Q04207  | Transcription factor p65                                                                             | Rela        | mmu:19697  | 1 | 1 |
| 372 | 0.5533 | 0.0510 | 0.4538 | 0.7522 | 1 | P36993  | Protein phosphatase 1B                                                                               | Ppm1b       | mmu:19043  |   |   |
| 373 | 1.1697 | 0.2986 | 0.3758 | 0.7648 | 1 | Q77MQ7  | WD repeat-containing protein 91                                                                      | Wdr91       | mmu:101240 |   |   |
| 374 | 0.075  | 0.5739 | 0.3476 | 0.7784 | 1 | P99027  | 60S acidic ribosomal protein P2                                                                      | Rplp2       | mmu:67186  |   |   |
| 375 | 0.6517 | 0.2468 | 0.1248 | 0.7825 | 1 | Q3TC11  | BRIC5 complex subunit Abro1                                                                          | Fam175b     | mmu:109359 |   |   |
| 376 | 0.4535 | 0.6470 | 0.2983 | 0.7829 | 1 | Q9J1J2  | 4-trimethylaminobutyraldehyde dehydrogenase                                                          | Aldehyde1   | mmu:56752  |   |   |
| 377 | 1.2319 | 0.2165 | 1.6608 | 0.7914 | 1 | P05142  | 60S ribosomal protein L35a                                                                           | Rpl35a      | mmu:57808  |   |   |
| 378 | 0.0000 | 0.0000 | 0.6268 | 0.7943 | 1 | P08207  | Protein S100-A10                                                                                     | S100a10     | mmu:20194  |   |   |
| 379 | 0.3386 | 0.2267 | 0.4038 | 0.7965 | 1 | Q50102  | Putative sodium-coupled neutral amino acid transporter 10                                            | Slc38a10    | mmu:72055  |   |   |
| 380 | 0.5280 | 0.9505 | 0.4285 | 0.8069 | 1 | Q8R2U4  | N-terminal Xaa-Pro-Lys N-methyltransferase 1;N-terminal Xaa-Pro-Lys N-methyltransferase 1, N-ter     | Ntm1        | mmu:66617  |   |   |
| 381 | 0.7597 | 0.8765 | 0.5570 | 0.8101 | 1 | Q9J1M1  | Equilibrative nucleoside transporter 1                                                               | Slc29a1     | mmu:63959  |   |   |
| 382 | 0.1561 | 0.6898 | 0.0598 | 0.8204 | 1 | P27808  | Alpha-1,3-mannosyl-glycoprotein 2-beta-N-acetylglucosaminyltransferase                               | Mgat1       | mmu:17308  |   |   |
| 383 | 0.5724 | 1.1504 | 0.7830 | 0.8215 | 1 | Q64327  | Male-enhanced antigen 1                                                                              | Mea1        | mmu:17256  |   |   |
| 384 | 0.1733 | 0.8589 | 0.0000 | 0.8342 | 1 | Q9D2C2  | Protein SAAL1                                                                                        | Saal1       | mmu:78935  |   |   |
| 385 | 0.4839 | 0.6691 | 0.7274 | 0.8583 | 1 | Q9D894  | Amyloid beta A4 precursor protein-binding family B member 2                                          | Apbb2       | mmu:11787  |   |   |
| 386 | 0.1489 | 0.6982 | 0.0778 | 0.8680 | 1 | Q62193  | Replication protein A 32 kDa subunit                                                                 | Rpa2        | mmu:65378  |   |   |
| 387 | 0.0184 | 0.0952 | 0.2788 | 0.8986 | 1 | Q9N476  | Actin-related protein 2/3 complex subunit 3                                                          | Arpc3       | mmu:74781  |   |   |
| 388 | 0.1812 | 0.9593 | 1.3610 | 0.9117 | 1 | Q8W4V7  | WD repeat domain phosphoinositide-interacting protein 2                                              | Wip2        | mmu:27416  |   |   |
| 389 | 0.4134 | 0.0769 | 0.6758 | 0.9219 | 1 | Q9RLX5  | Multidrug resistance-associated protein 5                                                            | Abcc5       | mmu:27416  |   |   |
| 390 | 1.3486 | 0.2782 | 0.6571 | 0.9372 | 1 | P54310  | Hormone-sensitive lipase                                                                             | Lipe        | mmu:16890  |   |   |
| 391 | 0.3078 | 0.5778 | 0.5594 | 0.9537 | 1 | P63005  | Platelet-activating factor acetylhydrolase IB subunit alpha                                          | Pafah1b1    | mmu:18472  |   |   |
| 392 | 1.4122 | 1.2338 | 0.4001 | 0.9629 | 1 | Q91YM2  | Rho GTPase-activating protein 35                                                                     | Arhgap35    | mmu:232906 |   |   |
| 393 | 0.0000 | 0.0792 | 0.0495 | 1.0026 | 1 | Q9ES46  | Beta-parvin                                                                                          | Parvb       | mmu:170736 |   |   |
| 394 | 0.2811 | 1.2288 | 1.1520 | 1.0510 | 1 | Q8C863  | E3 ubiquitin-protein ligase Itch                                                                     | Itch        | mmu:16396  |   |   |
| 395 | 1.0789 | 1.0604 | 0.9131 | 1.0511 | 1 | Q8C844  | GRAM domain-containing protein 4                                                                     | Gram4       | mmu:223752 |   | 1 |
| 396 | 0.0198 | 1.7789 | 0.2529 | 1.0532 | 1 | Q9J143  | Phosphatidate cytidyltransferase;Phosphatidate cytidyltransferase 2                                  | Cds2        | mmu:110911 |   |   |
| 397 | 0.8820 | 1.4263 | 0.6361 | 1.2140 | 1 | Q9J113  | Tubby-related protein 3                                                                              | Tubp3       | mmu:22158  |   |   |
| 398 | 0.0000 | 1.3055 | 1.6511 | 1.2488 | 1 | Q63448  | Eukaryotic translation initiation factor 4 gamma 2                                                   | Eif4g2      | mmu:13690  |   |   |
| 399 | 0.1181 | 0.6217 | 0.1576 | 1.2683 | 1 | Q77ML7  | Prostaglandin G/H synthase 2                                                                         | Ptg2        | mmu:75590  |   |   |
| 400 | 1.1395 | 0.4973 | 0.8144 | 1.2735 | 1 | Q05769  | Prostaglandin G/H synthase 2                                                                         | Ptg2        | mmu:19225  | 1 |   |
| 401 | 1.0068 | 1.1407 | 0.2969 | 1.3141 | 1 | Q8B695  | Protein phosphatase 1 regulatory subunit;Protein phosphatase 1 regulatory subunit 12B                | Ppp1r12b    | mmu:67683  |   |   |
| 402 | 0.4352 | 1.1462 | 1.2398 | 1.3315 | 1 | Q9D086  | Protein PBD1                                                                                         | Pbdc1       | mmu:67683  |   |   |
| 403 | 4.1657 | 0.3078 | 0.6172 | 1.3538 | 1 | P70188  | Kinesin-associated protein 3                                                                         | Kifap3      | mmu:16579  |   |   |
| 404 | 0.6265 | 0.7007 | 0.2327 | 1.3644 | 1 | P52633  | Signal transducer and transcription activator 6                                                      | Stat6       | mmu:20852  |   |   |
| 405 | 0.3356 | 0.0702 | 0.6603 | 1.4821 | 1 | Q77MY7  | Importin-8                                                                                           | Ipo8        | mmu:320727 |   |   |
| 406 | 0.0181 | 2.3911 | 1.5603 | 1.5281 | 1 | Q6NWW9  | Fibronectin type III domain-containing protein 3B                                                    | Fndc3b      | mmu:72007  |   |   |
| 407 | 0.2521 | 1.4486 | 0.4217 | 1.5692 | 1 | Q9JKN1  | Zinc transporter 7                                                                                   | Slc30a7     | mmu:66500  |   |   |
| 408 | 0.0000 | 0.0000 | 0.0000 | 1.5720 | 1 | Q9JKN1  | Zinc transporter 7                                                                                   | Slc30a7     | mmu:66500  |   |   |
| 409 | 0.2964 | 1.2781 | 0.6557 | 1.7929 | 1 | P54728  | Dehydrogenase/reductase SDR family member on chromosome X homolog                                    | Dhr3        | mmu:19359  |   |   |
| 410 | 0.5250 | 0.2985 | 0.5272 | 1.9242 | 1 | Q6A2R5  | UV excision repair protein RAD23 homolog B                                                           | Rad23b      | mmu:108077 |   |   |
| 411 | 4.6047 | 0.3224 | 1.5079 | 2.1450 | 1 | Q09110  | Dual specificity mitogen-activated protein kinase kinase 3                                           | Skiv2       | mmu:108077 |   |   |
| 412 | 0.7575 | 0.2913 | 1.1878 | 1.7455 | 1 | Q8R7R8  | Protein VPRBP                                                                                        | Map2k3      | mmu:26397  | 1 |   |
| 413 | 0.5707 | 0.7957 | 0.6153 | 1.6606 | 1 | Q8C050  | Ribosomal protein S6 kinase alpha-5                                                                  | Vprbp       | mmu:321006 |   |   |
| 414 | 0.1559 | 1.4463 | 0.2949 | 1.6324 | 1 | Q8B8M5  | TBC domain-containing protein kinase-like protein                                                    | Rps6ka5     | mmu:73086  | 1 |   |
| 415 | 0.3680 | 0.8472 | 0.1348 | 1.4500 | 1 | Q8R318  | Cyclin-dependent kinase 8;Cyclin-dependent kinase 19                                                 | Tbck        | mmu:271981 | 1 |   |
| 416 | 0.2725 | 0.1622 | 0.7261 | 1.3869 | 1 | Q35491  | Dual specificity protein kinase CLK2                                                                 | Cdk8;Cdk1   | mmu:264064 | 1 |   |
| 417 | 0.1015 | 0.5356 | 0.3399 | 0.3257 | 1 | Q8K663  | Casein kinase I isoform alpha                                                                        | Clk2        | mmu:12748  | 1 |   |
| 418 | 0.4090 | 0.4380 | 0.6737 | 0.6737 | 1 | Q8K663  | Casein kinase I isoform alpha                                                                        | Cskn1a1     | mmu:12748  | 1 |   |
| 419 | 0.0852 | 0.3307 | 0.4544 | 0.2931 | 1 | Q00093  | Receptor protein-tyrosine kinase;Tyrosine-protein kinase receptor UFO                                | Cskn2a1     | mmu:12995  | 1 |   |
| 420 | 0.1775 | 0.1107 | 0.4793 | 0.2511 | 1 | P70268  | Serine/threonine-protein kinase N1                                                                   | Axl         | mmu:26362  | 1 | 1 |
| 421 | 0.4991 | 0.0780 | 0.0975 | 0.2249 | 1 | Q54833  | Casein kinase II subunit alpha                                                                       | Pkn1        | mmu:320795 | 1 |   |
| 422 | 0.1789 | 0.4234 | 0.0610 | 0.2178 | 1 | Q04736  | Tyrosine-protein kinase Yes                                                                          | Cskn2a2     | mmu:13000  | 1 |   |
| 423 | 0.2341 | 0.0793 | 0.2339 | 0.1831 | 1 | Q64729  | Receptor protein serine/threonine kinase;TGF-beta receptor type-1                                    | Yes1        | mmu:22612  | 1 |   |
| 424 | 0.1555 | 0.1469 | 0.1929 | 0.1651 | 1 | Q9ES74  | Serine/threonine-protein kinase Nek7                                                                 | Tgfb1       | mmu:21812  | 1 |   |
| 425 | 0.0414 | 0.1945 | 0.1984 | 0.1448 | 1 | P05480  | Neuronal proto-oncogene tyrosine-protein kinase Src                                                  | Nek7        | mmu:59125  | 1 |   |
| 426 | 0.0000 | 0.0000 | 0.3436 | 0.1282 | 1 | Q62371  | Discoilin domain-containing receptor 2                                                               | Src         | mmu:20779  | 1 | 1 |
| 427 | 0.1436 | 0.1482 | 0.0728 | 0.1214 | 1 | Q60855  | Receptor-interacting serine/threonine-protein kinase                                                 | Ddr2        | mmu:18214  | 1 |   |
| 428 | 0.0158 | 0.0000 | 0.3659 | 0.2359 | 1 | Q9B843  | Non-specific serine/threonine protein kinase;Serine/threonine-protein kinase PAK 1                   | Ripk1       | mmu:19766  | 1 | 1 |
| 429 | 0.3445 | 0.4737 | 0.2659 | 0.2659 | 1 | Q8CTE4  | SCY1-like protein 2                                                                                  | Scyl2       | mmu:213326 | 1 |   |
| 430 | 0.4574 | 0.2501 | 0.3407 | 0.3494 | 1 | Q8C914  | Serine/threonine-protein kinase PAK 2;PAK-2p27;PAK-2p34                                              | Pak2        | mmu:224105 | 1 |   |
| 431 | 0.5862 | 0.4339 | 0.1815 | 0.4005 | 1 | Q70589  | Peripheral plasma membrane protein CASK                                                              | Cask        | mmu:12361  | 1 |   |
| 432 | 0.5190 | 0.1107 | 0.6352 | 0.4216 | 1 | P63085  | Mitogen-activated protein kinase 1                                                                   | Mapk1       | mmu:26413  | 1 | 1 |
| 433 | 0.4518 | 0.2535 | 0.5626 | 0.4226 | 1 | Q54988  | STE20-like serine/threonine-protein kinase                                                           | Slk         | mmu:20874  | 1 |   |
| 434 | 1.0972 | 0.6409 | 0.0768 | 0.6050 | 1 | P35761  | Dual specificity protein kinase TTK                                                                  | Ttk         | mmu:20874  | 1 |   |
| 435 | 0.2990 | 0.6818 | 0.9484 | 0.6431 | 1 | Q3UHJ0  | AP2-associated protein kinase 1                                                                      | Aak1        | mmu:269774 | 1 |   |
| 436 | 1.1800 | 0.2334 | 0.5763 | 0.6632 | 1 | Q9WV58  | Mitogen-activated protein kinase 7;Mitogen-activated protein kinase                                  | Mapk7       | mmu:29339  | 1 | 1 |
| 437 | 0.7954 | 1.4698 | 0.7308 | 1.0552 | 1 | Q55098  | Serine/threonine-protein kinase 10                                                                   | Skp10       | mmu:20868  | 1 |   |
| 438 | 0.3208 | 0.2024 | 0.7444 | 0.2089 | 1 | P61597  | Small ubiquitin-related modifier 2;Small ubiquitin-related modifier;Small ubiquitin-related modifier | Sumo2;Sumo3 | mmu:170930 |   |   |
| 439 | 0.2393 | 0.2513 | 0.6375 | 0.2049 | 1 | P04AWE  | Small ubiquitin-related modifier 2;Small ubiquitin-related modifier;Small ubiquitin-related modifier | Sumo2;Sumo3 | mmu:170930 |   |   |
| 440 | 4.1186 | 0.0776 | 0.7100 | 1.6354 | 1 | FAM1405 | Protein SCO1 homolog, mitochondrial                                                                  | Fam186a     | mmu:52892  |   |   |
| 441 | 1.3048 | 0.4184 | 0.1651 | 1.6294 | 1 | Q55UVC  | Mitochondrial import inner membrane translocase subunit TIM14                                        | Scn1        | mmu:67713  |   |   |
| 442 | 2.2172 | 0.9237 | 1.4646 | 1.5352 | 1 | Q9CQV7  | U2 small nuclear ribonucleoprotein B                                                                 | Dnajc9      | mmu:20639  |   |   |
| 443 | 1.2138 | 2.2059 | 1.0444 | 1.4880 | 1 | Q9CQJ7  | Prostaglandin H synthase 2;Prostaglandin H synthase 2 truncated form                                 | Snrpb2      | mmu:20639  |   |   |
| 444 | 2.1301 | 1.3500 | 0.6599 | 1.3800 | 1 | Q8BWM0  | Conserved oligomeric Golgi complex subunit 8                                                         | Ptges2      | mmu:96979  |   |   |
| 445 | 0.9449 | 1.0473 | 0.2901 | 1.3608 | 1 | Q9JIA2  | DCN1-like protein;DCN1-like protein 1                                                                | Cog8        | mmu:97484  |   |   |
| 446 | 0.3090 | 0.3686 | 0.6830 | 1.3602 | 1 | Q9C273  | ADP-ribosylation factor 12 member 9                                                                  | Dcn1d1      | mmu:114893 |   |   |
| 447 | 0.5019 | 0.2799 | 0.2401 | 1.3306 | 1 | Q99MR3  | ADP-ribosylation factor-like protein 6-interacting protein 1                                         | Slc12a9     | mmu:83704  |   |   |
| 448 | 4.9951 | 1.2854 | 2.3122 | 1.3409 | 1 | Q9JKW0  | Ribonucleoside-diphosphate reductase large subunit                                                   | Arfp6       | mmu:54208  |   |   |
| 449 | 0.8186 | 0.7812 | 1.3509 | 1.3140 | 1 | P07742  | Interferon-induced transmembrane protein 2                                                           | Rmt1        | mmu:20133  |   |   |
| 450 | 1.0097 | 1.6807 | 1.2256 | 1.3051 | 1 | Q9N993  | AP-4 complex subunit sigma-1                                                                         | Ifitm2      | mmu:80876  |   |   |
| 451 | 0.0713 | 0.1502 | 0.5221 | 1.2479 | 1 | Q9WVL1  | Calysenitin-1;Soluble Alc-alpha;CTF1-alpha                                                           | Ap4s1       | mmu:11782  |   |   |
| 452 | 0.8642 | 1.9894 | 0.7849 | 1.2128 | 1 | Q9FPL2  | Replication factor C subunit 1                                                                       | Cltn1       | mmu:65945  |   |   |
| 453 | 0.0956 | 1.9227 | 1.6002 | 1.2062 | 1 | P35601  | Fos-related antigen 193A                                                                             | Rfc1        | mmu:19687  |   |   |
| 454 | 1.8881 | 1.0217 | 0.6989 | 1.2029 | 1 | Q8CG11  | Fos-related antigen 193A                                                                             | Fam193a     | mmu:231128 |   |   |
| 455 | 1.8334 | 1.0042 | 0.6940 | 1.1772 | 1 | P48755  | 39S ribosomal protein L2, mitochondrial                                                              | Fosl1       | mmu:14283  | 1 |   |
| 456 | 0.2432 | 1.4376 | 1.8198 | 1.1698 | 1 | Q9D773  | Thymidine kinase, cytosolic                                                                          | Mprl2       | mmu:27398  |   |   |
| 457 | 0.5981 | 0.5503 | 0.2410 | 1.1269 | 1 | P04184  | Mediator of RNA polymerase II transcription subunit 11                                               | Tk1         | mmu:21877  |   |   |
| 458 | 1.3427 | 0.3561 | 1.4669 | 1.0552 | 1 | Q9D8C8  | Nuclear pore complex protein Nup160                                                                  | Med11       | mmu:66172  |   |   |
| 459 | 0.3713 | 0.4911 | 0.2949 | 1.0519 | 1 | Q9D1W3  | Glyoxalase GM2 activator                                                                             | Nup160      | mmu:59015  |   |   |
| 460 | 0.9730 | 0.5550 | 1.6049 | 1.0443 | 1 | G60E48  | Adf-synaphe;Molybdenum cofactor biosynthesis protein-like-region;FAD synthase region                 | Gme2a       | mmu:14667  |   |   |
| 461 | 0.5535 | 0.2277 | 0.3270 | 1.0361 | 1 | Q8L123  | Far-GAP with Rho-GAP domain, ANK repeat and PH domain containing;FAD synthase region                 | Flad1       | mmu:319945 |   |   |
| 462 | 2.2317 | 1.0770 | 0.7280 | 1.0282 | 1 | Q4LD04  | Factor VIII intron 22 protein                                                                        | Arap1       | mmu:69710  |   |   |
| 463 | 0.1766 | 2.4672 | 0.4287 | 1.0242 | 1 | Q00558  | Mitofusin-1                                                                                          | F8a;F8a1    | mmu:67414  |   |   |
| 464 | 2.1302 | 0.2173 | 0.7001 | 1.0159 | 1 | Q8B2H4  | Asparagine synthetase [glutamine-hydrolyzing]                                                        | Mfn1        | mmu:67414  |   |   |
| 465 | 0.2058 | 0.5988 | 0.3693 | 1.0080 | 1 | P70318  | Discoilin, CUB and LCLL domain-containing protein 2                                                  | Tial1;Tial2 | mmu:21843  |   | 1 |
| 466 | 2.8153 | 0.0598 | 0.1455 | 1.0069 | 1 | Q9I958  | Solute carrier family 12 member 4                                                                    | Slc12a4     | mmu:20498  |   |   |
| 467 | 1.2458 | 0.7898 | 0.9713 | 1.0023 | 1 | G61024  | Asparagine synthetase [glutamine-hydrolyzing]                                                        | Asns        | mmu:27053  |   |   |
| 468 | 0.3324 | 1.5976 | 1.0604 | 0.9968 | 1 | Q9I2V3  | Discoilin, CUB and LCLL domain-containing protein 2                                                  | Dcdl2       | mmu:73379  |   |   |
| 469 | 0.7549 | 0.6400 | 1.5734 | 0.9891 | 1 | Q8B4V7  | Zinc transporter ZIP11                                                                               | Slc39a11    | mmu:69806  |   |   |
| 470 | 0.1179 | 0.2939 | 0.5349 | 0.9838 | 1 | Q9D6C9  | NADH dehydrogenase (ubiquinone) 1 alpha subcomplex subunit 9, mitochondrial                          | Ndufa9      | mmu:66108  |   |   |
| 471 | 0.4920 | 0.2337 | 0.2088 | 0.9802 | 1 | Q9DZD8  | Mitochondrial dicarboxylate carrier                                                                  | Slc25a10    | mmu:27376  |   |   |



|     |         |         |         |         |   |        |                                                                                                                     |                   |            |
|-----|---------|---------|---------|---------|---|--------|---------------------------------------------------------------------------------------------------------------------|-------------------|------------|
| 494 | -0.1929 | -1.2190 | -0.9979 | -0.8033 | 1 | F8VPU2 | FERM, RhoGEF and pleckstrin domain-containing protein 1                                                             | Farp1             | mmu:223254 |
| 495 | -1.1307 | -0.1660 | -1.1049 | -0.8005 | 1 | Q9WV54 | Acid ceramidase;Acid ceramidase subunit alpha;Acid ceramidase subunit beta                                          | Asah1             | mmu:11886  |
| 496 | -0.7602 |         | -1.6118 | -0.7963 | 1 | Q4KML4 | Costars family protein ABRACL                                                                                       | Abracl            | mmu:73112  |
| 497 | -1.0770 | -1.0695 | -0.1997 | -0.7821 | 1 | Q68FE6 | Protein FAM65A                                                                                                      | Fam65a            | mmu:75687  |
| 498 | -0.7755 | -0.7914 | -0.7694 | -0.7788 | 1 | Q5DU37 | Zinc finger FYVE domain-containing protein 26                                                                       | Zfyve26           | mmu:211978 |
| 499 | -0.0886 | -0.7132 | -1.4801 | -0.7606 | 1 | Q9ZD28 | Methyl-CpG-binding domain protein 3                                                                                 | Mbd3              | mmu:17192  |
| 500 | -0.3822 | -0.5358 | -1.3309 | -0.7494 | 1 | Q9QCT2 | NADH dehydrogenase [ubiquinone] iron-sulfur protein 3, mitochondrial                                                | Nduh3             | mmu:68349  |
| 501 | -0.7844 | -0.9788 | -0.4727 | -0.7453 | 1 | Q9EP82 | tRNA (guanine-N(7))-methyltransferase non-catalytic subunit Wdr4;tRNA (guanine-N(7))-methyltransferase Wdr4         | Wdr4              | mmu:57773  |
| 502 | -0.2724 | -0.6025 | -1.3490 | -0.7413 | 1 | Q9CPQ1 | Cytochrome c oxidase subunit 6C                                                                                     | Cox6c             | mmu:12864  |
| 503 | -1.5213 | -0.1266 | -0.5667 | -0.7382 | 1 | Q6Z093 | Ubiquitin carboxyl-terminal hydrolase 34;Ubiquitin carboxyl-terminal hydrolase                                      | Usp34             | mmu:17847  |
| 504 | -1.2679 | -0.2400 | -0.6783 | -0.7287 | 1 | Q80V62 | Fanconi anemia group D2 protein homolog                                                                             | Fancd2            | mmu:211651 |
| 505 | -1.9209 | -0.0876 | -0.1471 | -0.7185 | 1 | Q88GU5 | Cyclin-Y                                                                                                            | Ccny              | mmu:67974  |
| 506 | -0.7404 | -0.6299 | -0.7852 | -0.7185 | 1 | Q9D083 | Kinetochore protein Spc24                                                                                           | Spc24             | mmu:67629  |
| 507 | -0.4156 | -0.8819 | -0.8560 | -0.7178 | 1 | Q9D8P4 | 39S ribosomal protein L17, mitochondrial                                                                            | Mrlp17            | mmu:27397  |
| 508 | -0.5390 | -0.5195 | -1.0910 | -0.7165 | 1 | Q5PSV9 | Mediator of DNA damage checkpoint protein 1                                                                         | Mdc1              | mmu:240087 |
| 509 | -0.1138 | -1.2685 | -0.7486 | -0.7109 | 1 | Q8C682 | Rhotekin                                                                                                            | Rtkn              | mmu:20166  |
| 510 | -1.2057 | -0.4219 | -0.4737 | -0.7004 | 1 | Q9D119 | Regulator complex protein LAMTOR5                                                                                   | Lamtor5           | mmu:68576  |
| 511 | -1.5000 | -0.1694 | -0.4232 | -0.6975 | 1 | Q6GV12 | 3-ketodihydrosphingosine reductase                                                                                  | Kdsr              | mmu:70750  |
| 512 | -0.6045 | -1.0500 | -0.4337 | -0.6961 | 1 | Q6P6L6 |                                                                                                                     | Gemin4            | mmu:276919 |
| 513 | -0.6691 | -0.7679 | -0.6396 | -0.6923 | 1 | Q9D822 | TP53-regulated inhibitor of apoptosis 1                                                                             | Triap1            | mmu:69076  |
| 514 | -0.9996 | -0.4055 | -0.6651 | -0.6901 | 1 | Q3UGP9 | Leucine-rich repeat-containing protein 58                                                                           | Lrrc58            | mmu:320184 |
| 515 | -1.3551 | -0.2151 | -0.4663 | -0.6788 | 1 | Q88587 | Catechol O-methyltransferase                                                                                        | Comt              | mmu:12846  |
| 516 | -1.0818 | -0.3082 | -0.6413 | -0.6771 | 1 | Q3UI43 | BRISC and BRCA1-A complex member 1                                                                                  | Babam1            | mmu:68251  |
| 517 | -0.4474 | -0.8061 | -0.7401 | -0.6645 | 1 | Q9CX86 | Heterogeneous nuclear ribonucleoprotein A0                                                                          | Hnnpa0            | mmu:77134  |
| 518 | -0.4180 | -0.6638 | -0.9024 | -0.6614 | 1 | Q9WV72 | Ankyrin repeat and SOCS box protein 3                                                                               | Abt3              | mmu:65257  |
| 519 | -0.1955 | -0.0169 | -0.8628 | -0.6576 | 1 | Q70213 | Friend virus susceptibility protein 1                                                                               | Fv1               | mmu:14349  |
| 520 | -0.5213 | -0.4134 | -0.9265 | -0.6547 | 1 | Q09143 | High affinity cationic amino acid transporter 1                                                                     | Sc7a1             | mmu:11987  |
| 521 | -0.0481 | -1.0942 | -0.8068 | -0.6500 | 1 | Q80UV2 | E3 ubiquitin-protein ligase KCMF1                                                                                   | Kcmf1             | mmu:74287  |
| 522 | -0.2649 | -0.5014 | -1.1516 | -0.6393 | 1 | P61211 | ADP-ribosylation factor-like protein 1                                                                              | Arl1              | mmu:104303 |
| 523 | -0.4371 | -0.7874 | -0.6806 | -0.6350 | 1 | Q8CFO9 | U4/U6 small nuclear ribonucleoprotein Prp31                                                                         | Prp31             | mmu:68988  |
| 524 | -0.3515 | -0.4053 | -1.1212 | -0.6260 | 1 | Q9Z1E4 | Glycogen [starch] synthase, muscle                                                                                  | Gys1              | mmu:14936  |
| 525 | -0.1708 | -0.4858 | -1.1613 | -0.6060 | 1 | Q88F29 | Erlin-2                                                                                                             | Erlin2            | mmu:244373 |
| 526 | -0.9591 | -0.5301 | -0.3252 | -0.6048 | 1 | Q61655 | ATP-dependent RNA helicase DDX19A                                                                                   | Ddx19a;Ddx19b     | mmu:13680  |
| 527 | -0.3695 | -0.6702 | -0.7688 | -0.6028 | 1 | Q3UQ84 | Threonine--tRNA ligase, mitochondrial                                                                               | Tars2             | mmu:71807  |
| 528 | -0.2518 | -0.7013 | -0.8488 | -0.6006 | 1 | Q9CB22 | Mitochondrial fission 1 protein                                                                                     | Fis1              | mmu:66437  |
| 529 | -0.3625 | -0.6512 | -0.7582 | -0.5996 | 1 | Q8BN31 | Nucleolar protein 14                                                                                                | Nop14             | mmu:75416  |
| 530 | -0.2289 | -1.0116 | -0.5277 | -0.5894 | 1 | Q3UB88 | Myeloma-overexpressed gene 2 protein homolog                                                                        | Myen2             | mmu:66915  |
| 531 | -1.1722 | -0.3657 | -0.2244 | -0.5874 | 1 | Q9D061 | Acyl-CoA-binding domain-containing protein 6                                                                        | Acdb6             | mmu:72482  |
| 532 | -0.8596 | -0.7735 | -0.1174 | -0.5835 | 1 | Q9QU86 | Prolyl endopeptidase                                                                                                | Prep              | mmu:19072  |
| 533 | -0.1408 |         | -1.5925 | -0.5826 | 1 | P70302 | Stromal interaction molecule 1                                                                                      | Stim1             | mmu:20866  |
| 534 | -0.0996 | -0.0459 | -1.5926 | -0.5794 | 1 | P57716 | Nicestrin                                                                                                           | Ncstrn            | mmu:59287  |
| 535 | -0.5252 | -0.4621 | -0.7418 | -0.5764 | 1 | Q9CXR1 | Dehydrogenase/reductase SDR family member 7                                                                         | Dhrs7             | mmu:66375  |
| 536 | -1.1749 | -0.1450 | -0.3838 | -0.5679 | 1 | Q07139 | Protein ECT2                                                                                                        | Ect2              | mmu:13605  |
| 537 | -0.2066 | -0.3253 | -1.1554 | -0.5624 | 1 | Q6P781 | Transportin-3                                                                                                       | Tnp3              | mmu:320938 |
| 538 | -0.7670 | -0.8380 | -0.0814 | -0.5621 | 1 | B2R704 | Dedicator of cytokinesis protein 5                                                                                  | Dock5             | mmu:68813  |
| 539 | -0.0961 | -1.3509 | -0.2337 | -0.5602 | 1 | P60898 | DNA-directed RNA polymerase II subunit RPB9;DNA-directed RNA polymerase subunit                                     | Polr2i            | mmu:69920  |
| 540 | -1.3663 | -0.2520 | -1.0546 | -0.5576 | 1 | Q8K4F6 | Probable 28S rRNA (cytosine-C15) methyltransferase                                                                  | Nmuf5             | mmu:100609 |
| 541 | -0.3668 | -0.8017 | -0.4732 | -0.5472 | 1 | Q148V7 | LisH domain and HEAT repeat-containing protein KIAA1468                                                             | Kiaa1468;Kiaa1469 | mmu:227446 |
| 542 | -0.9836 | -0.5816 | -0.0747 | -0.5466 | 1 | P70297 | Signal transducing adapter molecule 1                                                                               | Stam              | mmu:20844  |
| 543 | -0.5052 | -1.0399 | -0.0922 | -0.5458 | 1 | Q91W34 |                                                                                                                     |                   | mmu:233913 |
| 544 | -0.2991 | -0.0920 | -1.2458 | -0.5456 | 1 | A2AKU9 | ATP synthase subunit gamma                                                                                          | Atp5c1            | mmu:217830 |
| 545 | -0.8275 | -0.5284 | -0.2713 | -0.5424 | 1 | Q88H86 | UPF0317 protein C14orf159 homolog, mitochondrial                                                                    | 90306170          | mmu:217830 |
| 546 | -0.1491 | -0.8401 | -0.6071 | -0.5321 | 1 | Q9D7N3 | 28S ribosomal protein S9, mitochondrial                                                                             | Mrps9             | mmu:69527  |
| 547 | -0.5834 | -0.6393 | -0.3695 | -0.5307 | 1 | Q8VC81 | Nucleoporin NDC1                                                                                                    | Ndc1              | mmu:72787  |
| 548 |         | -0.5788 | -0.9837 | -0.5259 | 1 | P49570 | Calcium signal-modulating cyclophilin ligand                                                                        | Camlg             | mmu:12528  |
| 549 | -0.4248 | -0.3436 | -0.7750 | -0.5145 | 1 | Q88RC5 | Cleavage stimulation factor subunit 2                                                                               | Cstf2             | mmu:108062 |
| 550 | -0.6294 | -0.1873 | -0.7219 | -0.5138 | 1 | Q8C007 | Inhibitor of growth protein 4                                                                                       | Inr4              | mmu:28019  |
| 551 | -0.4865 |         | -1.0428 | -0.5104 | 1 | Q9ER41 | Torsin-1B                                                                                                           | Tor1b             | mmu:30934  |
| 552 | -0.4765 | -0.8710 | -0.1717 | -0.5064 | 1 | Q9EQC1 | 3 beta-hydroxysteroid dehydrogenase type 7                                                                          | Hsd3b7            | mmu:101502 |
| 553 | -0.7517 | -0.2676 | -0.4985 | -0.5059 | 1 | Q9C8T8 | Exportin-T                                                                                                          | Xpot              | mmu:213673 |
| 554 | -1.2511 | -0.2146 | -0.0411 | -0.5023 | 1 | Q8K201 | Keratinocyte-associated transmembrane protein 2                                                                     | 9530068E          | mmu:213673 |
| 555 | -0.5532 | -0.3452 | -0.5969 | -0.4984 | 1 | P43406 | Integrin alpha-V;Integrin alpha-V heavy chain;Integrin alpha-V light chain                                          | Ilgav             | mmu:16410  |
| 556 | -1.1697 |         | -0.3054 | -0.4976 | 1 | Q88983 | Syntaxin-8                                                                                                          | Stx8              | mmu:55943  |
| 557 | -0.0950 | -0.7265 | -0.6689 | -0.4968 | 1 | Q9JUL6 | Selenocysteine lyase                                                                                                | Scly              | mmu:50880  |
| 558 | -0.3383 | -0.6886 | -0.4386 | -0.4885 | 1 | Q89901 | Carboxypeptidase D                                                                                                  | Cpd               | mmu:12874  |
| 559 | -0.0488 | -0.5819 | -0.8331 | -0.4882 | 1 | P23223 | Developmentally-regulated GTP-binding protein 1                                                                     | Drg1              | mmu:13494  |
| 560 | -0.2647 | -0.6130 | -0.5695 | -0.4844 | 1 | B1AUR6 | Protein NMS22-like                                                                                                  | Nm22l             | mmu:212377 |
| 561 | -0.1177 |         | -1.3229 | -0.4804 | 1 | Q9D8X5 | CCRA-NOT transcription complex subunit 8                                                                            | Cnot8             | mmu:69125  |
| 562 | -0.7820 | -0.4705 | -0.1706 | -0.4744 | 1 | P72892 | AP-1 complex subunit gamma-1                                                                                        | Ap1g1             | mmu:11765  |
| 563 | -0.0188 | -0.1295 | -1.2469 | -0.4711 | 1 | Q9D958 | Signal peptidase complex subunit 1                                                                                  | Spcs1             | mmu:69019  |
| 564 | -0.6835 | -0.1671 | -0.5624 | -0.4710 | 1 | Q6PA06 | Atlastin-2                                                                                                          | At12              | mmu:56298  |
| 565 | -0.9016 | -0.4549 | -0.0485 | -0.4687 | 1 | Q80Y81 | Zinc phosphodiesterase ELAC protein 2                                                                               | Elac2             | mmu:68626  |
| 566 | -0.5544 | -0.4047 | -0.4150 | -0.4580 | 1 | Q9Z2Q8 | Leucine-rich repeat-containing protein 59                                                                           | Lrrc59            | mmu:98238  |
| 567 | -0.5693 | -0.1124 | -0.6888 | -0.4568 | 1 | Q35459 | Delta(3,5)-Delta(2,4)-dienoyl-CoA isomerase, mitochondrial                                                          | Ech1              | mmu:51798  |
| 568 | -0.3476 | -0.9740 | -0.0078 | -0.4563 | 1 | P51175 | Protoporphyrinogen oxidase                                                                                          | Ppox              | mmu:19044  |
| 569 | -0.3564 | -0.6376 | -0.1709 | -0.4550 | 1 | Q35227 | Protein C10                                                                                                         | Crc10             | mmu:14790  |
| 570 | -0.0969 | -1.0871 | -0.1759 | -0.4533 | 1 | P46737 | Lys-63-specific deubiquitinase BRCC36                                                                               | Brc32             | mmu:210766 |
| 571 | -0.3055 | -0.9691 | -0.0779 | -0.4506 | 1 | Q9ERE7 | LDLR chaperone MESD                                                                                                 | Mesdc2            | mmu:67943  |
| 572 | -0.7637 | -0.1502 | -0.4264 | -0.4468 | 1 | Q75IG6 | ARF-GAP with SH3 domain, ANK repeat and PH domain-containing protein 2                                              | Asap2             | mmu:211914 |
| 573 | -0.9757 | -0.1873 | -0.1759 | -0.4463 | 1 | Q6P9L6 | Kinesin-like protein KIF15                                                                                          | Kif15             | mmu:209737 |
| 574 | -0.8597 | -0.2093 | -0.2671 | -0.4454 | 1 | Q88RT1 | CLP-associating protein 2                                                                                           | Clasp2            | mmu:76499  |
| 575 | -0.3596 | -0.7593 | -0.2143 | -0.4444 | 1 | P58468 | Protein FAM207A                                                                                                     | Fam207a           | mmu:108070 |
| 576 | -0.2412 | -0.6054 | -0.4802 | -0.4423 | 1 | Q06335 | Amyloid-like protein 2                                                                                              | Aplp2             | mmu:11804  |
| 577 | -0.7592 | -0.1546 | -0.4013 | -0.4384 | 1 | Q8CSQ4 | G-rich sequence factor 1                                                                                            | Gsf1              | mmu:231413 |
| 578 | -0.0868 | -0.5670 | -0.6963 | -0.4360 | 1 | Q6NVF0 | Inositol polyphosphate 5-phosphatase OCRL-1                                                                         | Ocrl              | mmu:320634 |
| 579 | -0.6149 | -0.4372 | -0.0488 | -0.4348 | 1 | Q8R5M8 | Cell adhesion molecule 1                                                                                            | Cadm1             | mmu:54725  |
| 580 | -0.3384 | -0.4120 | -0.5427 | -0.4310 | 1 | P11370 | MLV-related proviral Env polypeptide;Surface protein;Transmembrane protein;Retrovirus-related                       | Fv4               | mmu:21856  |
| 581 | -0.1587 | -0.3909 | -0.7238 | -0.4263 | 1 | Q35857 | Mitochondrial import inner membrane translocase subunit TIM44                                                       | Timm44            | mmu:102607 |
| 582 | -0.1886 | -1.0597 | -0.0411 | -0.4264 | 1 | Q6P471 |                                                                                                                     | Snx19             | mmu:23888  |
| 583 | -0.3941 | -0.6210 | -0.2627 | -0.4259 | 1 | Q9R087 | Glypican-6;Secreted glypican-6                                                                                      | Gpc6              | mmu:271457 |
| 584 | -0.4417 | -0.0601 | -0.7748 | -0.4256 | 1 | P08556 | GTase NRas                                                                                                          | Nras              | mmu:15510  |
| 585 | -0.4715 | -0.3747 | -0.4237 | -0.4233 | 1 | P63038 | 60 kDa heat shock protein, mitochondrial                                                                            | Hspd1             | mmu:271457 |
| 586 | -0.5106 |         | -0.7425 | -0.4228 | 1 | Q9CQD1 | Ras-related protein Rab-5A                                                                                          | Rab5a             | mmu:14450  |
| 587 | -0.3933 | -0.3257 | -0.5380 | -0.4190 | 1 | Q64737 | Trifunctional purine biosynthetic protein adenosine-3;Phosphoribosylamine--glycine ligase;Phosphoribosyltransferase | Gart              | mmu:193116 |
| 588 | -0.8670 | -0.2959 | -0.0897 | -0.4109 | 1 | Q88H99 | Pre-mRNA-splicing factor SLU7                                                                                       | Slu7              | mmu:66314  |
| 589 | -0.6865 | -0.4520 | -0.0925 | -0.4103 | 1 | Q9C222 | Tumor protein D54                                                                                                   | Tpd52l2           | mmu:74467  |
| 590 | -0.0906 | -0.3221 | -0.8148 | -0.4092 | 1 | Q9D3U0 | Putative RNA pseudouridine synthase Pus10                                                                           | Pus10             |            |
| 591 | -0.0537 | -0.3178 | -0.8487 | -0.4074 | 1 | Q88856 | Protein-tyrosine sulfotransferase 2                                                                                 | Tpsl2             |            |
| 592 | -0.1871 | -0.8322 | -0.1737 | -0.3977 | 1 | Q64449 | C-type mannose receptor 2                                                                                           | Mrc2              | mmu:17534  |
| 593 | -0.1187 | -0.4975 | -0.5669 | -0.3944 | 1 | Q9QY00 | Alpha-adducin                                                                                                       | Add1              | mmu:11518  |
| 594 | -0.3445 | -0.2977 | -0.5401 | -0.3941 | 1 | Q55033 | Cytoplasmic protein NCK2                                                                                            | Nck2              | mmu:17974  |
| 595 | -0.4107 | -0.1322 | -0.6239 | -0.3889 | 1 | P35276 | Ras-related protein Rab-3D                                                                                          | Rab3d             | mmu:19340  |
| 596 |         | -0.3380 | -0.8105 | -0.3881 | 1 | Q9ESJ0 | Exportin-4                                                                                                          | Xpo4              | mmu:57258  |
| 597 | -0.2939 | -0.1720 | -0.6950 | -0.3870 | 1 | P23475 | X-ray repair cross-complementing protein 6                                                                          | Xrcc6             | mmu:14375  |
| 598 | -0.2084 | -0.3149 | -0.6324 | -0.3846 | 1 | P09055 | Integrin beta-1                                                                                                     | Igb1              | mmu:16412  |
| 599 | -0.3731 | -0.1711 | -0.6094 | -0.3815 | 1 | Q99K13 | ER membrane protein complex subunit 3                                                                               | Emc3              | mmu:66087  |
| 600 | -0.5202 | -0.1537 | -0.4649 | -0.3796 | 1 | P58742 | Aladin                                                                                                              | Aaas              | mmu:223921 |
| 601 | -0.3464 | -0.5818 | -0.2096 | -0.3793 | 1 | Q8RA66 | Nucleoporin NUP53                                                                                                   | Nup35             | mmu:69482  |
| 602 | -0.2752 | -0.0818 | -0.7793 | -0.3784 | 1 | Q8VC0F | Mitochondrial antiviral-signaling protein                                                                           | Mavs              | mmu:228607 |
| 603 | -0.5290 | -0.3071 | -0.2958 | -0.3773 | 1 | Q9CQ62 | Methyltransferase-like protein;Methyltransferase-like protein 16                                                    | Mett16            | mmu:67493  |
| 604 | -0.4407 | -0.5254 | -0.1632 | -0.3764 | 1 | Q8VDI7 | Ubiquitin-associated domain-containing protein 1                                                                    | Ubacl1            | mmu:98766  |
| 605 | -0.6329 | -0.3713 | -0.1018 | -0.3687 | 1 | Q62465 | Synaptic vesicle membrane protein VAT-1 homolog                                                                     | Vat1              | mmu:26949  |
| 606 | -0.3608 | -0.3557 | -0.3881 | -0.3682 | 1 | Q8QZY9 | Splicing factor 3B subunit 4                                                                                        | Sf3b4             | mmu:107701 |
| 607 | -0.1450 | -0.6983 | -0.2554 | -0.3662 | 1 |        |                                                                                                                     |                   |            |

|     |         |         |         |         |   |            |                                                                                                    |           |                        |
|-----|---------|---------|---------|---------|---|------------|----------------------------------------------------------------------------------------------------|-----------|------------------------|
| 620 | -0.4539 | -0.3168 | -0.2834 | -0.3514 | 1 | B1AXD8     | Akirin-2                                                                                           | Akirin2   | mmu:433693             |
| 621 | -0.4841 | -0.1815 | -0.3830 | -0.3495 | 1 | Q8VEA8     | Ras-related protein Rab-7b                                                                         | Rab7b/543 | mmu:226421             |
| 622 | -0.2445 | -0.4596 | -0.3412 | -0.3484 | 1 | Q5H8C4     | Vacuolar protein sorting-associated protein 13A                                                    | Vps13a    | mmu:271564             |
| 623 | -0.3527 | -0.3251 | -0.3509 | -0.3429 | 1 | Q09MS57    | EH domain-binding protein 1-like protein 1                                                         | Ehbp111   | mmu:114601             |
| 624 | -0.2533 | -0.2435 | -0.5266 | -0.3411 | 1 | Q9CZW7     | Gamma-soluble NSF attachment protein                                                               | Napg      | mmu:108123             |
| 625 | -0.2402 | -0.4361 | -0.3447 | -0.3440 | 1 | Q51W95     | Anaphase-promoting complex subunit 4                                                               | Anapc4    | mmu:52206              |
| 626 | -0.3071 | -0.4730 | -0.2356 | -0.3346 | 1 | Q8QUJ2     | Ribonuclease P protein subunit p38                                                                 | Rpp38     | mmu:16418              |
| 627 | -0.3908 | -0.3450 | -0.2786 | -0.3381 | 1 | Q55135     | Eukaryotic translation initiation factor 6                                                         | Elf6      | mmu:16418              |
| 628 | -0.6496 | -0.0728 | -0.3236 | -0.3377 | 1 | A0A0G2JD19 |                                                                                                    |           |                        |
| 629 | -0.0996 | -0.5031 | -0.4011 | -0.3346 | 1 | Q192X7     | Protein density lipoprotein receptor-related protein 1;Low-density lipoprotein receptor-related pr | Lrp1      | mmu:16971              |
| 630 | -0.0680 | -0.4171 | -0.5100 | -0.3317 | 1 | Q099F8     | Nuclear pore complex protein Nup155                                                                | Nup155    | mmu:170762             |
| 631 | -0.0335 | -0.5276 | -0.4264 | -0.3298 | 1 | Q09916     | Leukotriene-B(4) omega-hydroxylase 2                                                               | Cyp4f16c  | mmu:72054              |
| 632 | -0.3065 | -0.0690 | -0.6690 | -0.3285 | 1 | A2A1V2     | Protein virilizer homolog                                                                          |           | 1110037F02Rik;Kiaa1429 |
| 633 | -0.6149 | -0.0727 | -0.3415 | -0.3265 | 1 | Q090C9     | Mannose-6-phosphate utilization defect 1 protein                                                   | Mpu1      | mmu:140740             |
| 634 | -0.1537 | -0.2125 | -0.6123 | -0.3262 | 1 | Q8VHE0     | Translocation protein SEC63 homolog                                                                | Sec63     | mmu:20692              |
| 635 | -0.1506 | -0.6370 | -0.1354 | -0.3243 | 1 | P07214     | SPARC                                                                                              | Sparc     | mmu:108037             |
| 636 | -0.0829 | -0.4712 | -0.3225 | -0.3235 | 1 | Q0C2N7     | Serine hydroxymethyltransferase                                                                    | Shmt2     | mmu:65106              |
| 637 | -0.5294 | -0.4187 | -0.3216 | -0.3216 | 1 | Q8R5J9     | PRA1 family protein 3                                                                              | Ar16p5    | mmu:66162              |
| 638 | -0.2966 | -0.1761 | -0.4889 | -0.3205 | 1 | Q8R6S2     | Bola-A-like protein 2                                                                              | Bola2     | mmu:66278              |
| 639 | -0.5310 | -0.4220 | -0.3179 | -0.3179 | 1 | D3Z7Q2     |                                                                                                    | Smm20     | mmu:11432              |
| 640 | -0.2054 | -0.2677 | -0.4777 | -0.3169 | 1 | P24638     | Lysosomal acid phosphatase                                                                         | Acp2      | mmu:64652              |
| 641 | -0.1351 | -0.4579 | -0.3550 | -0.3160 | 1 | Q80TM9     | Nischarin                                                                                          | Nisch     | mmu:69672              |
| 642 | -0.2276 | -0.3740 | -0.3431 | -0.3149 | 1 | Q6P6J9     | Thioredoxin domain-containing protein 15                                                           | Txndc15   | mmu:320554             |
| 643 | -0.7235 | -0.2160 | -0.3145 | -0.3145 | 1 | Q8BTG3     | T-complex protein 11-like protein 1                                                                | Tcp111    | mmu:270166             |
| 644 | -0.1257 | -0.7908 | -0.3136 | -0.3136 | 1 | Q9JH54     | ATP-dependent Clp protease ATP-binding subunit clpX-like, mitochondrial                            | Clpx      | mmu:15177              |
| 645 | -0.1279 | -0.0588 | -0.7594 | -0.3125 | 1 | P70155     | Proteasome subunit beta type-7                                                                     | Psmb7     | mmu:109754             |
| 646 | -0.5500 | -0.2020 | -0.1812 | -0.3114 | 1 | Q90CA2     | NADH-cytochrome b5 reductase 3;NADH-cytochrome b5 reductase 3 membrane-bound form;NAD              | Cyb5b3    | mmu:50868              |
| 647 | -0.3125 | -0.3939 | -0.2219 | -0.3094 | 1 | Q92X28     | Kelch-like ECH-associated protein 1                                                                | Keap2     | mmu:13495              |
| 648 | -0.2816 | -0.1553 | -0.4898 | -0.3089 | 1 | Q90X89     | Developmentally-regulated GTP-binding protein 2                                                    | Drg2      | mmu:217737             |
| 649 | -0.2127 | -0.2810 | -0.4292 | -0.3076 | 1 | Q8R6K4     | Activator of 90 kDa heat shock protein ATPase homolog 1                                            | Ahsa1     | mmu:20643              |
| 650 | -0.5753 | -0.0649 | -0.2712 | -0.3038 | 1 | P62305     | Small nuclear ribonucleoprotein E                                                                  | Snrpe     | mmu:227648             |
| 651 | -0.0592 | -0.3684 | -0.4664 | -0.2980 | 1 | E9QAT4     |                                                                                                    | Sec16a    | mmu:68087              |
| 652 | -0.0612 | -0.4826 | -0.3471 | -0.2970 | 1 | Q8RHC4     | Dephospho-CoA kinase domain-containing protein                                                     | Dckad     | mmu:116940             |
| 653 | -0.2043 | -0.0829 | -0.5800 | -0.2891 | 1 | Q923W1     | Trimethylguanosine synthase                                                                        | Tgs1      | mmu:69590              |
| 654 | -0.3376 | -0.0971 | -0.4818 | -0.2890 | 1 | Q9D787     | Probable glutathione peroxidase 8                                                                  | Gpx8      | mmu:72654              |
| 655 | -0.2137 | -0.6031 | -0.3888 | -0.2888 | 1 | Q8R344     | Colicid-coll domain-containing protein 12                                                          | Ccd12     | mmu:30935              |
| 656 | -0.4706 | -0.3569 | -0.2885 | -0.2885 | 1 | Q9CQM9     | Glutaredoxin-3                                                                                     | Glxr3     | mmu:100121             |
| 657 | -0.4953 | -0.1066 | -0.2481 | -0.2833 | 1 | Q8K1H1     | Tudor domain-containing protein 7                                                                  | Tdrd7     | mmu:27998              |
| 658 | -0.0933 | -0.4979 | -0.2541 | -0.2818 | 1 | Q9CRA8     | Exosome complex component RRP46                                                                    | Exosc5    | mmu:56327              |
| 659 | -0.3010 | -0.4514 | -0.0873 | -0.2799 | 1 | Q9D0U4     | ADP-ribosylation factor-like protein 2                                                             | Ar12      | mmu:68585              |
| 660 | -0.2908 | -0.3868 | -0.1604 | -0.2793 | 1 | Q09P72     | Reticulon-4                                                                                        | Rtn4      | mmu:75296              |
| 661 | -0.1995 | -0.1621 | -0.4746 | -0.2787 | 1 | Q66JX5     | FGFR1 oncogene partner                                                                             | Fgfr1op   | mmu:70420              |
| 662 | -0.1240 | -0.3741 | -0.3347 | -0.2776 | 1 | Q9D0A3     | Arpin                                                                                              | Arpin     | mmu:11306              |
| 663 | -0.2300 | -0.0860 | -0.5125 | -0.2762 | 1 | Q61102     | ATP-binding cassette sub-family B member 7, mitochondrial                                          | Abcb7     | mmu:80914              |
| 664 | -0.1098 | -0.1605 | -0.5509 | -0.2747 | 1 | Q09PM9     | Uridine-cytidine kinase 2                                                                          | Uck2      | mmu:12492              |
| 665 | -0.3277 | -0.4899 | -0.3746 | -0.2746 | 1 | Q35114     | Lysosome membrane protein 2                                                                        | Scarb2    | mmu:11972              |
| 666 | -0.4336 | -0.3532 | -0.2739 | -0.2739 | 1 | P51163     | V-type proton ATPase subunit d 1                                                                   | Atp6o0d1  | mmu:27419              |
| 667 | -0.2465 | -0.3485 | -0.2188 | -0.2713 | 1 | Q8R325     |                                                                                                    | Naglu     | mmu:66641              |
| 668 | -0.2575 | -0.2943 | -0.2613 | -0.2710 | 1 | Q9CPR7     | Suppressor of IKKBE 1                                                                              | Sike1     | mmu:28028              |
| 669 | -0.0485 | -0.6947 | -0.0693 | -0.2708 | 1 | Q8VD19     | 39S ribosomal protein L50, mitochondrial                                                           | Mrlp50    | mmu:68981              |
| 670 | -0.028  | -0.3520 | -0.4307 | -0.2705 | 1 | P57784     | U2 small nuclear ribonucleoprotein A                                                               | Snrpa1    | mmu:59001              |
| 671 | -0.6520 | -0.1285 | -0.2700 | -0.2700 | 1 | Q9IKP7     | DNA polymerase epsilon subunit 3                                                                   | Pole3     | mmu:56384              |
| 672 | -0.1009 | -0.5367 | -0.1702 | -0.2693 | 1 | Q92Z10     | LETM1 and EF-hand domain-containing protein 1, mitochondrial                                       | Letm1     | mmu:19650              |
| 673 | -0.1180 | -0.5864 | -0.0947 | -0.2664 | 1 | Q64701     | Retinoblastoma-like protein 1                                                                      | Rbl1      | mmu:70903              |
| 674 | -0.1714 | -0.2946 | -0.3306 | -0.2659 | 1 | Q3U186     | Probable arginine-tRNA ligase, mitochondrial                                                       | Rars2     | mmu:140951             |
| 675 | -0.0871 | -0.6698 | -0.6478 | -0.2646 | 1 | Q8RWB6     | Metalloendopeptidase STEAP2                                                                        | Steap2    | mmu:75286              |
| 676 | -0.0642 | -0.1127 | -0.6079 | -0.2646 | 1 | P97266     | Endoplasmic reticulum protein 5                                                                    | Ev5       | mmu:70549              |
| 677 | -0.4558 | -0.3176 | -0.2587 | -0.2587 | 1 | Q7U1X4     | Talin-2                                                                                            | Tln2      | mmu:11736              |
| 678 | -0.2287 | -0.3856 | -0.1525 | -0.2556 | 1 | Q81086     | Rabankyrin-5                                                                                       | Rnkfy1    | mmu:233876             |
| 679 | -0.3869 | -0.3502 | -0.2508 | -0.2508 | 1 | Q8R8H7     | HIRA-interacting protein 3                                                                         | Hirp3     | mmu:15526              |
| 680 | -0.3434 | -0.0555 | -0.3517 | -0.2502 | 1 | P38647     | Stress-70 protein, mitochondrial                                                                   | Hspa9     | mmu:70435              |
| 681 | -0.3518 | -0.3207 | -0.0730 | -0.2485 | 1 | Q3U3T8     | WD repeat-containing protein 62                                                                    | Wdr62     | mmu:54722              |
| 682 | -0.3804 | -0.3370 | -0.2480 | -0.2480 | 1 | Q0GNC1     | Inverted formin-2                                                                                  | Inf2      | mmu:74205              |
| 683 | -0.4639 | -0.2603 | -0.2472 | -0.2455 | 1 | Q92Z03     | Non-syndromic hearing impairment protein 5 homolog                                                 | Dna5      | mmu:74205              |
| 684 | -0.4639 | -0.0368 | -0.2359 | -0.2455 | 1 | Q9CZW4     | Long-chain-fatty-acid-CoA ligase 3                                                                 | Acl3      | mmu:17158              |
| 685 | -0.0486 | -0.0486 | -0.2450 | -0.2450 | 1 | Q27046     | Alpha-mannosidase 2                                                                                | Man2a1    | mmu:56706              |
| 686 | -0.5242 | -0.1689 | -0.2438 | -0.2438 | 1 | Q5ZKX7     | Cyclin-L1                                                                                          | Ccn1      | mmu:76308              |
| 687 | -0.4409 | -0.0334 | -0.2485 | -0.2407 | 1 | Q9D1G1     | Ras-related protein Rab-18                                                                         | Rab18     | mmu:68278              |
| 688 | -0.0608 | -0.1760 | -0.4832 | -0.2400 | 1 | Q8VDW0     | ATP-dependent RNA helicase DDX39A                                                                  | Ddx39a    | mmu:103573             |
| 689 | -0.3126 | -0.1546 | -0.2525 | -0.2399 | 1 | Q6P5F9     | Exportin-1                                                                                         | Xpo1      | mmu:68278              |
| 690 | -0.4707 | -0.2224 | -0.2368 | -0.2368 | 1 | P51912     | Amino acid transporter;Neutral amino acid transporter B(0)                                         | Slc1a5    | mmu:109168             |
| 691 | -0.1595 | -0.2484 | -0.3021 | -0.2367 | 1 | Q91YH5     | Atlastin-3                                                                                         | At13      | mmu:58180              |
| 692 | -0.1579 | -0.5068 | -0.0428 | -0.2359 | 1 | Q9U1Z6     | Hypermethylated in cancer 2 protein                                                                | Hic2      | mmu:229211             |
| 693 | -0.1717 | -0.1161 | -0.4195 | -0.2358 | 1 | Q8U2N5     | Acyl-CoA dehydrogenase family member 9, mitochondrial                                              | Acad9     | mmu:74617              |
| 694 | -0.0982 | -0.3639 | -0.2438 | -0.2353 | 1 | Q92D05     | Retinoid-inducible serine carboxypeptidase                                                         | Scepp1    | mmu:75286              |
| 695 | -0.3005 | -0.1177 | -0.2875 | -0.2352 | 1 | A2A6T5     | Cytoskeleton-associated protein 5                                                                  | Ckap5     | mmu:66474              |
| 696 | -0.2187 | -0.1813 | -0.2997 | -0.2332 | 1 | P97322     | Acidic leucine-rich nuclear phosphoprotein 32 family member E                                      | Anp32     | mmu:12558              |
| 697 | -0.6530 | -0.2320 | -0.2320 | -0.2320 | 1 | P51516     | Cadherin-2                                                                                         | Cdh2      | mmu:16195              |
| 698 | -0.1897 | -0.0868 | -0.4143 | -0.2303 | 1 | Q00560     | Interleukin-6 receptor subunit beta                                                                | Il6st     | mmu:67873              |
| 699 | -0.1744 | -0.2366 | -0.2757 | -0.2289 | 1 | Q9CQ71     | Methylthioribose 1-phosphate isomerase                                                             | Mri1      | mmu:67844              |
| 700 | -0.0411 | -0.2242 | -0.4210 | -0.2288 | 1 | Q9CZ63     | Ras-related protein Rab-32                                                                         | Rab32     | mmu:26951              |
| 701 | -0.2298 | -0.4439 | -0.2284 | -0.2284 | 1 | Q54692     | Centromere/kinetochore protein zw10 homolog                                                        | Zw10      | mmu:16432              |
| 702 | -0.0746 | -0.0944 | -0.5159 | -0.2283 | 1 | Q8R051     | Integral membrane protein 28;BR12, membrane form;BR12 intracellular domain;BR12C, soluble form     | Itm2b     | mmu:21672              |
| 703 | -0.6506 | -0.6506 | -0.2254 | -0.2254 | 1 | Q61171     | Peroxisomal protein 2                                                                              | Pdx2      | mmu:70699              |
| 704 | -0.5409 | -0.0526 | -0.0810 | -0.2249 | 1 | B9E154     | Sphingomyelin phosphodiesterase 2                                                                  | Smpd2     | mmu:20598              |
| 705 | -0.4474 | -0.1924 | -0.2237 | -0.2237 | 1 | Q70702     | Protein asurder homolog                                                                            | Asur      | mmu:71171              |
| 706 | -0.1460 | -0.4451 | -0.0789 | -0.2222 | 1 | Q9C2V7     | Dolichyl-phosphate beta-glucosyltransferase                                                        | Alg5      | mmu:66248              |
| 707 | -0.2535 | -0.2197 | -0.1857 | -0.2196 | 1 | Q90R25     | Nuclear pore glycoprotein p62                                                                      | Nup62     | mmu:18226              |
| 708 | -0.1346 | -0.0424 | -0.4741 | -0.2185 | 1 | Q63850     | Splicing factor 3B subunit 1                                                                       | Sf3b1     | mmu:18971              |
| 709 | -0.2465 | -0.1512 | -0.2546 | -0.2174 | 1 | Q09N89     | DNA polymerase delta catalytic subunit;DNA polymerase                                              | Pold1     | mmu:215449             |
| 710 | -0.0568 | -0.1264 | -0.4559 | -0.2130 | 1 | P52431     | Ras-related protein Rap-1b                                                                         | Rap1b     | mmu:18597              |
| 711 | -0.3154 | -0.1050 | -0.2181 | -0.2128 | 1 | Q09U16     | Pyruvate dehydrogenase E1 component subunit alpha, somatic form, mitochondrial                     | Pdh1a     | mmu:218503             |
| 712 | -0.1953 | -0.3907 | -0.0458 | -0.2105 | 1 | P35486     | F-BAR domain only protein 2                                                                        | Fcho2     | mmu:105014             |
| 713 | -0.3328 | -0.2149 | -0.0774 | -0.2084 | 1 | Q3UQ22     | Retinol dehydrogenase 14                                                                           | Rdh14     | mmu:100088             |
| 714 | -0.1624 | -0.1725 | -0.2895 | -0.2081 | 1 | Q9ER16     | Regulator of chromosome condensation                                                               | Rcc1      | mmu:230905             |
| 715 | -0.2740 | -0.2929 | -0.0688 | -0.2071 | 1 | Q8VE37     | TAR DNA-binding protein 43                                                                         | Tardbp    | mmu:68014              |
| 716 | -0.1477 | -0.1015 | -0.3635 | -0.2043 | 1 | Q921F2     | Protein zwilch homolog                                                                             | Zwilch    | mmu:66592              |
| 717 | -0.4347 | -0.1333 | -0.0434 | -0.2031 | 1 | Q8R060     | Stomatatin-like protein 2, mitochondrial                                                           | Stoml2    | mmu:433956             |
| 718 | -0.2037 | -0.0958 | -0.3072 | -0.2026 | 1 | Q091B2     | Dynein assembly factor 5, axonemal                                                                 | Dnaaf5    | mmu:226154             |
| 719 | -0.5174 | -0.0171 | -0.0455 | -0.1983 | 1 | B9E1R8     | Leucine zipper putative tumor suppressor 2                                                         | Lts2      | mmu:221732             |
| 720 | -0.1617 | -0.2023 | -0.2261 | -0.1967 | 1 | Q91YU6     | Cell division cycle protein 27 homolog                                                             | Cdc27     | mmu:72322              |
| 721 | -0.0386 | -0.3106 | -0.2387 | -0.1960 | 1 | A2A6Q5     | Exportin-5                                                                                         | Xpo5      | mmu:433256             |
| 722 | -0.2020 | -0.2568 | -0.1241 | -0.1943 | 1 | Q924C1     | Long-chain-fatty-acid-CoA ligase 5                                                                 | Acl5      | mmu:67078              |
| 723 | -0.2060 | -0.1196 | -0.2440 | -0.1899 | 1 | Q8U2R0     | Phosphoglycolate phosphatase                                                                       | Pgp       | mmu:228725             |
| 724 | -0.1485 | -0.3275 | -0.0822 | -0.1861 | 1 | Q8CHP8     | Chloride channel CLIC-like protein 1                                                               | Clic1     | mmu:217124             |
| 725 | -0.0888 | -0.2901 | -0.1863 | -0.1794 | 1 | Q92912     | Neurabin-2                                                                                         | Nrabin2   | mmu:231713             |
| 726 | -0.1594 | -0.3548 | -0.1779 | -0.1779 | 1 | Q6R891     | N-alpha-acetyltransferase 25, NafB auxiliary subunit                                               | Naa25     | mmu:22166              |
| 727 | -0.1500 | -0.3485 | -0.1745 | -0.1745 | 1 | Q8R8W23    | Thioredoxin                                                                                        | Txn       | mmu:27061              |
| 728 | -0.2038 | -0.1952 | -0.1136 | -0.1709 | 1 | P10639     | B-cell receptor-associated protein 31                                                              | Bcap31    | mmu:22214              |
| 729 | -0.2248 | -0.2340 | -0.0518 | -0.1702 | 1 | Q61335     | Ubiquitin-conjugating enzyme E2 H                                                                  | Ube2h     | mmu:70361              |
| 730 | -0.1410 | -0.2841 | -0.0850 | -0.1700 | 1 | P62257     | Protein ERGIC-53                                                                                   | Lman1     | mmu:74142              |
| 731 | -0.2406 | -0.2365 | -0.1667 | -0.1667 | 1 | Q9D0F3     | Lon protease homolog, mitochondrial                                                                | Lonp1     | mmu:230249             |
| 732 | -0.2702 | -0.0926 | -0.1328 | -0.1652 | 1 | F7B198     | Proteasome-associated protein ECM29 homolog                                                        | Ecm29a3   | mmu:268390             |
| 733 | -0.1392 | -0.2196 | -0.1357 | -0.1648 | 1 | Q8CGK3     | Activator of 90 kDa heat shock protein ATP                                                         |           |                        |

|     |         |         |         |         |   |        |                                                                                                                       |            |            |  |   |
|-----|---------|---------|---------|---------|---|--------|-----------------------------------------------------------------------------------------------------------------------|------------|------------|--|---|
| 746 | -0.1189 | -0.0881 | -0.2220 | -0.1430 | 1 | Q3U7R1 | Extended synaptotagmin-1                                                                                              | Esy1t      | mmu:23943  |  |   |
| 747 | -0.0354 | -0.0354 | -0.3762 | -0.1406 | 1 | P17427 | AP-2 complex subunit alpha-2                                                                                          | Ap2a2      | mmu:11772  |  |   |
| 748 | -0.1665 | -0.0937 | -0.1501 | -0.1368 | 1 | A8C756 | Thyroid adenoma-associated protein homolog                                                                            | Thada      | mmu:240174 |  |   |
| 749 | -0.1471 | -0.0659 | -0.1868 | -0.1333 | 1 | Q88H50 | Uncharacterized protein C18orf25 homolog                                                                              | 8030462N   | mmu:212163 |  |   |
| 750 | -0.2814 | -0.0866 | -0.0813 | -0.1271 | 1 | Q9D104 | Transmembrane emp24 domain-containing protein 10                                                                      | Tmed10     | mmu:68581  |  |   |
| 751 | -0.0666 | -0.2354 | -0.1008 | -0.1261 | 1 | P5C285 | Ras-related protein Rap-1A                                                                                            | Rap1a      | mmu:109905 |  |   |
| 752 | -0.1184 | -0.1173 | -0.0963 | -0.1240 | 1 | Q80K95 | Ras-related GTP-binding protein A:Ras-related GTP-binding protein B                                                   | RragA/Rrag | mmu:68441  |  |   |
| 753 | -0.1159 | -0.0938 | -0.1787 | -0.1180 | 1 | Q92120 | tRNA (guanine-N(7))-methyltransferase                                                                                 | Mett1t     | mmu:17299  |  |   |
| 754 | -0.1632 | -0.1028 | -0.0546 | -0.1103 | 1 | Q9C242 | ATP-dependent (S)-NAD(P)H-hydrate dehydratase                                                                         | Carkd      | mmu:69225  |  |   |
| 755 | -0.1252 | -0.1659 | -0.0777 | -0.1045 | 1 | Q60864 | Stress-induced-phosphoprotein 1                                                                                       | Stip1      | mmu:20867  |  |   |
| 756 | -0.1691 | -0.0796 | -0.0584 | -0.1024 | 1 | Q9QYF9 | Protein NDRG3                                                                                                         | Ndr3       | mmu:29812  |  |   |
| 757 | -0.1313 | -0.0777 | -0.1501 | -0.1016 | 1 | C03548 | Centrin-3                                                                                                             | Cetn3      | mmu:12626  |  |   |
| 758 | -0.1509 | -0.1229 | -0.0777 | -0.0979 | 1 | Q91Y12 | Sorting nexin-4                                                                                                       | Snx4       | mmu:69150  |  |   |
| 759 | -0.0285 | -0.0409 | -0.2053 | -0.0936 | 1 | Q88G32 | 26S proteasome non-ATPase regulatory subunit 11                                                                       | Psm11      | mmu:69077  |  |   |
| 760 | -0.1088 | -0.0777 | -0.1538 | -0.0859 | 1 | Q3U114 | DNA damage-binding protein 1                                                                                          | Ddb1       | mmu:13194  |  | 1 |
| 761 | -0.1270 | -0.0777 | -0.1203 | -0.0849 | 1 | Q88K55 | Cytochrome P450 20A1                                                                                                  | Cyp20a1    | mmu:77951  |  |   |
| 762 | -0.0388 | -0.0409 | -0.1679 | -0.0806 | 1 | Q6Z318 | Transcription intermediary factor 1-beta                                                                              | Trim28     | mmu:21849  |  |   |
| 763 | -0.1500 | -0.0388 | -0.0586 | -0.0791 | 1 | C05841 | Apoptosis inhibitor 5                                                                                                 | Api5       | mmu:11800  |  | 1 |
| 764 | -0.0137 | -0.1484 | -0.0511 | -0.0777 | 1 | Q09104 | Dehydrogenase/reductase SDR family member 1                                                                           | Dhrs1      | mmu:52585  |  |   |
| 765 | -0.0777 | -0.0771 | -0.1156 | -0.0699 | 1 | Q9Z1F9 | SUMO-activating enzyme subunit 2                                                                                      | Uba2       | mmu:50995  |  |   |
| 766 | -0.0314 | -0.0474 | -0.1287 | -0.0602 | 1 | Q9D759 | Charged multivesicular body protein 5                                                                                 | Chmp5      | mmu:76959  |  |   |
| 767 | -0.0702 | -0.0630 | -0.0391 | -0.0670 | 1 | Q88L66 | Early endosome antigen 1                                                                                              | Eea1       | mmu:216238 |  |   |
| 768 | -0.0388 | -0.0777 | -0.1438 | -0.0488 | 1 | Q70456 | 14-3-3 protein sigma                                                                                                  | Sfn        | mmu:55948  |  | 1 |
| 769 | -0.0338 | -0.1107 | -0.0374 | -0.0646 | 1 | A2A4P0 | ATP-dependent RNA helicase DHX8                                                                                       | Dhx8       | mmu:217207 |  |   |
| 770 | -0.0764 | -0.0374 | -0.0965 | -0.0699 | 1 | Q56925 | Probable ATP-dependent RNA helicase DDX46                                                                             | Ddx46      | mmu:212880 |  |   |
| 771 | -0.1097 | -0.0338 | -0.0586 | -0.0744 | 1 | Q91V65 | Methyltransferase-like protein E3                                                                                     | Mettl3     | mmu:71449  |  |   |
| 772 | -0.0338 | -0.0338 | -0.1900 | -0.0786 | 1 | Q6Z612 | Eukaryotic translation initiation factor 4 gamma 1                                                                    | Eif4g1     | mmu:208643 |  |   |
| 773 | -0.1456 | -0.0644 | -0.0349 | -0.0862 | 1 | Q8C0V9 | FERM domain-containing protein 6                                                                                      | Frm6       | mmu:319710 |  |   |
| 774 | -0.0804 | -0.1048 | -0.0748 | -0.0867 | 1 | Q8C0G9 | F-box/LRR-repeat protein 8                                                                                            | Fbx8       | mmu:50788  |  |   |
| 775 | -0.0777 | -0.2482 | -0.0777 | -0.0931 | 1 | Q88MP6 | Golgi resident protein GCP60                                                                                          | Acdb3      | mmu:170760 |  |   |
| 776 | -0.0777 | -0.1163 | -0.1633 | -0.0980 | 1 | P55012 | Solute carrier family 12 member 2                                                                                     | Slc12a2    | mmu:20496  |  |   |
| 777 | -0.1125 | -0.1239 | -0.0788 | -0.1037 | 1 | Q05186 | Reticulocalbin-1                                                                                                      | Rcn1       | mmu:19672  |  |   |
| 778 | -0.0777 | -0.0279 | -0.2588 | -0.1065 | 1 | Q99L48 | 60S ribosomal export protein NMD3                                                                                     | Nmd3       | mmu:97112  |  |   |
| 779 | -0.0835 | -0.0777 | -0.2472 | -0.1140 | 1 | Q8C0D5 | Elongation factor Tu GTP-binding domain-containing protein 1                                                          | Eftud1     | mmu:101592 |  |   |
| 780 | -0.2687 | -0.0777 | -0.0838 | -0.1199 | 1 | Q9WYTM | RuvB-like 2                                                                                                           | Ruvb2      | mmu:20174  |  |   |
| 781 | -0.0586 | -0.0777 | -0.2951 | -0.1224 | 1 | Q2XKW8 | Cytoplasmic dynein 1 intermediate chain 2                                                                             | Ppf1a1     | mmu:233977 |  |   |
| 782 | -0.1688 | -0.2173 | -0.1287 | -0.1287 | 1 | Q88A87 | Mini-chromosome maintenance complex-binding protein                                                                   | Dync1c2    | mmu:13427  |  |   |
| 783 | -0.1043 | -0.2058 | -0.1013 | -0.1371 | 1 | Q8R3C0 | Unconventional myosin-le                                                                                              | Mcm9b      | mmu:210711 |  |   |
| 784 | -0.2661 | -0.0777 | -0.1442 | -0.1447 | 1 | E9Q634 | tRNA-dihydrouridine(47) synthase [NAD(P)+]-like                                                                       | Myo1e      | mmu:71602  |  |   |
| 785 | -0.0944 | -0.2368 | -0.1122 | -0.1478 | 1 | Q91X11 | Serine/threonine-protein phosphatase 4 regulatory subunit 2                                                           | Dus3l      | mmu:224907 |  |   |
| 786 | -0.1202 | -0.1758 | -0.1487 | -0.1482 | 1 | Q0VGB7 | F-actin-capping protein subunit beta                                                                                  | Ppp4r2     | mmu:232314 |  |   |
| 787 | -0.0777 | -0.3234 | -0.1286 | -0.1509 | 1 | G3X972 | Pyridine nucleotide-disulfide oxidoreductase domain-containing protein 1                                              | Sec24c     | mmu:12345  |  |   |
| 788 | -0.0570 | -0.1532 | -0.2443 | -0.1515 | 1 | P47757 | Kinesin-like protein KIF2A                                                                                            | Capz2      | mmu:232491 |  | 1 |
| 789 | -0.0331 | -0.0915 | -0.3227 | -0.1558 | 1 | Q3TMV7 | T-complex protein 1 subunit theta                                                                                     | Pyrxd1     | mmu:16563  |  |   |
| 790 | -0.2768 | -0.1457 | -0.0777 | -0.1577 | 1 | P28740 | Multivesicular body subunit 12A                                                                                       | Kif2a      | mmu:12469  |  |   |
| 791 | -0.3250 | -0.1537 | -0.1693 | -0.1693 | 1 | P42923 | Cell division cycle protein 123 homolog                                                                               | Cdc23      | mmu:7711   |  |   |
| 792 | -0.0923 | -0.2073 | -0.1860 | -0.1649 | 1 | Q78WU3 | Heat shock 70 kDa protein 4                                                                                           | Mvb12a     | mmu:98828  |  |   |
| 793 | -0.0977 | -0.1637 | -0.2753 | -0.1656 | 1 | Q8C1C2 | 40S ribosomal protein S3                                                                                              | Cdc123     | mmu:223978 |  | 1 |
| 794 | -0.2568 | -0.1659 | -0.0785 | -0.1671 | 1 | Q61316 | Hsp40                                                                                                                 | Hspa4      | mmu:27050  |  |   |
| 795 | -0.0529 | -0.2166 | -0.2370 | -0.1688 | 1 | P62908 | Mitochondrial import inner membrane translocase subunit Tim9                                                          | Rps3       | mmu:30056  |  | 1 |
| 796 | -0.0880 | -0.0742 | -0.3474 | -0.1609 | 1 | Q9WV98 | Bcl2-associated agonist of cell death                                                                                 | Timm9      | mmu:12015  |  |   |
| 797 | -0.3511 | -0.1023 | -0.0588 | -0.1701 | 1 | Q61337 | Histone-lysine N-methyltransferase setd3                                                                              | Bad        | mmu:52690  |  | 1 |
| 798 | -0.0777 | -0.3358 | -0.1673 | -0.1708 | 1 | Q91WC0 | Enhancer of rudimentary homolog                                                                                       | Setd3      | mmu:13877  |  |   |
| 799 | -0.3509 | -0.0982 | -0.0920 | -0.1804 | 1 | P84089 | Nucleolar protein 6                                                                                                   | Erh        | mmu:230082 |  |   |
| 800 | -0.0994 | -0.2376 | -0.2100 | -0.1810 | 1 | Q8R5K4 | NF-kappa-B-repressing factor                                                                                          | Nof        | mmu:77286  |  |   |
| 801 | -0.1153 | -0.1295 | -0.3009 | -0.1887 | 1 | Q88V02 | Obg-like ATPase 1                                                                                                     | Nkrf       | mmu:67059  |  |   |
| 802 | -0.1540 | -0.0905 | -0.3027 | -0.1854 | 1 | Q9C230 | Protein chibby homolog 1                                                                                              | Oia1       | mmu:73739  |  |   |
| 803 | -0.1752 | -0.0701 | -0.3057 | -0.1837 | 1 | Q9D1C2 | Enhancer of rudimentary homolog                                                                                       | Cby1       | mmu:56086  |  |   |
| 804 | -0.2953 | -0.2334 | -0.1864 | -0.1864 | 1 | Q9EQUS | NSFL1 cofactor p47                                                                                                    | Set        | mmu:386649 |  |   |
| 805 | -0.1787 | -0.2954 | -0.1176 | -0.1972 | 1 | Q9C244 | Heterogeneous nuclear ribonucleoprotein Q                                                                             | Nsf1c      | mmu:56403  |  |   |
| 806 | -0.1769 | -0.3809 | -0.1538 | -0.1973 | 1 | Q7TMK9 | E3 SUMO-protein ligase NSE2                                                                                           | Syncrip    | mmu:68501  |  |   |
| 807 | -0.3383 | -0.0786 | -0.2017 | -0.2062 | 1 | Q91V71 | Lanosterol 14-alpha demethylase                                                                                       | Nsmc2      | mmu:13121  |  |   |
| 808 | -0.3153 | -0.2120 | -0.1118 | -0.2130 | 1 | Q8K0C4 | Serine/threonine-protein phosphatase CPPED1                                                                           | Cyp51a1    | mmu:223978 |  | 1 |
| 809 | -0.1540 | -0.2530 | -0.2333 | -0.2134 | 1 | Q8R6F5 | AMP deaminase 2                                                                                                       | Cpped1     | mmu:109674 |  |   |
| 810 | -0.1830 | -0.0788 | -0.3814 | -0.2142 | 1 | Q9D8T5 | Transmembrane 9 superfamily member 2                                                                                  | Ampd2      | mmu:102122 |  |   |
| 811 | -0.0962 | -0.3451 | -0.2093 | -0.2162 | 1 | Q91WE2 | Armadillo repeat-containing protein 8                                                                                 | Fam192a    | mmu:68059  |  |   |
| 812 | -0.2235 | -0.3071 | -0.1185 | -0.2165 | 1 | P58021 | Elongation factor 2                                                                                                   | Tm9d21     | mmu:74125  |  |   |
| 813 | -0.1397 | -0.0777 | -0.4652 | -0.2173 | 1 | Q9D8R3 | Filamin-A                                                                                                             | Arm8       | mmu:13629  |  | 1 |
| 814 | -0.1913 | -0.0656 | -0.4608 | -0.2197 | 1 | P58252 | Ras-related protein Rap-2c                                                                                            | Eef2       | mmu:27065  |  |   |
| 815 | -0.2479 | -0.0656 | -0.3470 | -0.2202 | 1 | Q88TM8 | Eh domain-binding protein 1                                                                                           | Flna       | mmu:215655 |  |   |
| 816 | -0.2320 | -0.2403 | -0.1925 | -0.2216 | 1 | Q8BU31 | Unconventional myosin-Ixb                                                                                             | Rap2c      | mmu:71978  |  |   |
| 817 | -0.2326 | -0.2405 | -0.2016 | -0.2249 | 1 | Q692W3 | Serine/threonine-protein phosphatase 2A 55 kDa regulatory subunit B alpha isoform                                     | Ehbp3      | mmu:268449 |  |   |
| 818 | -0.4028 | -0.0595 | -0.2272 | -0.2298 | 1 | Q9C0V6 | 60S ribosomal protein L23a                                                                                            | Myo9b      | mmu:28441  |  |   |
| 819 | -0.2780 | -0.1032 | -0.3234 | -0.2349 | 1 | Q6P1F6 | Proteasome subunit alpha type-4                                                                                       | Ppp2r2a    | mmu:14381  |  |   |
| 820 | -0.0694 | -0.0777 | -0.6376 | -0.2375 | 1 | P6Z751 | MAGUK p55 subfamily member 6                                                                                          | Rpl23a     | mmu:56524  |  |   |
| 821 | -0.2310 | -0.1134 | -0.3705 | -0.2403 | 1 | Q9R1P0 | Retinol dehydrogenase 11                                                                                              | Psm4       | mmu:17252  |  |   |
| 822 | -0.2354 | -0.2772 | -0.2457 | -0.2457 | 1 | Q9C0G2 | Swi5-dependent recombination DNA repair protein 1 homolog                                                             | Gpp61      | mmu:67788  |  |   |
| 823 | -0.2858 | -0.1400 | -0.3047 | -0.2435 | 1 | Q9U108 | Eukaryotic translation initiation factor 3 subunit C                                                                  | Mpp6       | mmu:56347  |  |   |
| 824 | -0.1929 | -0.2052 | -0.3615 | -0.2532 | 1 | Q9QYF1 | Signal recognition particle 9 kDa protein                                                                             | Rdh11      | mmu:27058  |  |   |
| 825 | -0.3740 | -0.2950 | -0.1031 | -0.2574 | 1 | Q88P27 | Beta-catenin-like protein 1                                                                                           | Sfr1       | mmu:66642  |  |   |
| 826 | -0.1381 | -0.3565 | -0.2918 | -0.2621 | 1 | Q8R184 | Double-stranded RNA-binding protein Staufen homolog 1                                                                 | Elf3c      | mmu:20853  |  |   |
| 827 | -0.2868 | -0.2444 | -0.2635 | -0.2649 | 1 | P49962 | Axin interactor, dorsalization-associated protein                                                                     | Srp9       | mmu:108909 |  |   |
| 828 | -0.4052 | -0.2937 | -0.0961 | -0.2650 | 1 | Q9CWL8 | Serum albumin                                                                                                         | Elf3c      | mmu:56347  |  |   |
| 829 | -0.0777 | -0.1096 | -0.6532 | -0.2650 | 1 | F8WU14 | Bifunctional purine biosynthesis protein PURH:Phosphoribosylaminoimidazolecarboxamide formyl                          | Ctnnb1     | mmu:66642  |  |   |
| 830 | -0.1440 | -0.1930 | -0.4024 | -0.2681 | 1 | Q9Z108 | Transforming protein RhoA                                                                                             | Ecm1       | mmu:108147 |  |   |
| 831 | -0.1983 | -0.1698 | -0.2689 | -0.2689 | 1 | Q8C4C6 | ATP synthase subunit d, mitochondrial                                                                                 | Stau1      | mmu:20853  |  |   |
| 832 | -0.4714 | -0.1385 | -0.1936 | -0.2684 | 1 | P07724 | Chromatin assembly factor 1 subunit 8                                                                                 | Aida       | mmu:11657  |  |   |
| 833 | -0.2018 | -0.5470 | -0.0615 | -0.2702 | 1 | Q9C0W9 | SAP30-binding protein                                                                                                 | Alb        | mmu:108147 |  | 1 |
| 834 | -0.0831 | -0.0777 | -0.7174 | -0.2710 | 1 | Q9U100 | Splicing factor 3B subunit 5                                                                                          | Rhoa       | mmu:11848  |  |   |
| 835 | -0.0835 | -0.2983 | -0.4391 | -0.2736 | 1 | Q9DCK2 | Ras-related protein Rab-9A                                                                                            | M10250J    | mmu:71679  |  |   |
| 836 | -0.3187 | -0.3325 | -0.1710 | -0.2741 | 1 | Q9D0N7 | Tight junction protein ZO-1                                                                                           | Chaf1b     | mmu:110749 |  |   |
| 837 | -0.2642 | -0.3151 | -0.2472 | -0.2755 | 1 | Q0Z614 | Polyadenylate-binding protein 1                                                                                       | Sap30b     | mmu:57230  |  |   |
| 838 | -0.0777 | -0.0777 | -0.7970 | -0.2776 | 1 | Q9Z3D4 | Proteasome subunit alpha type-1                                                                                       | Sf3b5      | mmu:66125  |  | 1 |
| 839 | -0.3786 | -0.2908 | -0.1673 | -0.2789 | 1 | Q9R0M6 | C-1-tetrahydrofolate synthase, cytoplasmic:Methylenetetrahydrofolate dehydrogenase:Methylenetetrahydrofolate synthase | Rab9a/Rab  | mmu:56382  |  |   |
| 840 | -0.0731 | -0.2787 | -0.4839 | -0.2791 | 1 | P39447 | Inositol hexakisphosphate and diphosphoinositol-pentakisphosphate kinase 1                                            | Tjp1       | mmu:21872  |  |   |
| 841 | -0.0698 | -0.4348 | -0.3497 | -0.2841 | 1 | P79341 | Dedicator of cytokinesis protein 1                                                                                    | Patgpc1    | mmu:18458  |  |   |
| 842 | -0.4618 | -0.2944 | -0.0900 | -0.2851 | 1 | Q8R1P4 | Glutamate dehydrogenase 1, mitochondrial                                                                              | Psm1a      | mmu:26440  |  |   |
| 843 | -0.2226 | -0.1870 | -0.4382 | -0.2826 | 1 | Q9Z2D8 | Eukaryotic translation initiation factor 3 subunit B                                                                  | Mthfd1     | mmu:108156 |  |   |
| 844 | -0.5177 | -0.1566 | -0.1382 | -0.2842 | 1 | A2A8P1 | Signal recognition particle 9 kDa protein                                                                             | Ppip5k1    | mmu:327655 |  | 1 |
| 845 | -0.1671 | -0.4702 | -0.2188 | -0.2854 | 1 | P26443 | Beta-catenin-like protein 1                                                                                           | Glud1      | mmu:14661  |  |   |
| 846 | -0.0562 | -0.1298 | -0.6724 | -0.2861 | 1 | Q88UR4 | E3 ubiquitin-protein ligase RBX1:E3 ubiquitin-protein ligase RBX1, N-terminally processed                             | Dock1      | mmu:330662 |  |   |
| 847 | -0.2093 | -0.4551 | -0.1995 | -0.2880 | 1 | P62878 | Exocyst complex component 4                                                                                           | Rbx1       | mmu:56438  |  | 1 |
| 848 | -0.2699 | -0.5291 | -0.0711 | -0.2900 | 1 | C05382 | E3 ubiquitin-protein ligase UBR3                                                                                      | Exoc4      | mmu:20336  |  |   |
| 849 | -0.4392 | -0.3627 | -0.0688 | -0.2901 | 1 | Q5U430 | Elongation factor 1-beta                                                                                              | Sfrp9      | mmu:68795  |  |   |
| 850 | -0.3330 | -0.2087 | -0.3420 | -0.2946 | 1 | P70251 | 26S proteasome non-ATPase regulatory subunit 6                                                                        | E          |            |  |   |

|     |        |        |        |        |   |        |                                                                                                  |            |               |   |
|-----|--------|--------|--------|--------|---|--------|--------------------------------------------------------------------------------------------------|------------|---------------|---|
| 872 | 0.0000 | 0.5982 | 0.3931 | 0.3441 | 1 | P62307 | Small nuclear ribonucleoprotein F                                                                | Snrpf      | mmu:69878     |   |
| 873 | 0.0713 | 0.0137 | 0.5296 | 0.3475 | 1 | B2RU88 |                                                                                                  | Map4k4     |               |   |
| 874 | 0.3472 | 0.2838 | 0.4220 | 0.3510 | 1 | P61327 | Protein mago nashi homolog                                                                       | Magoh      | mmu:17149     |   |
| 875 | 0.2013 | 0.4799 | 0.3738 | 0.3517 | 1 | Q6PD0H | Pleckstrin homology-like domain family 8 member 1                                                | Phldb1     | mmu:102693    |   |
| 876 | 0.0846 | 0.5736 | 0.4080 | 0.3547 | 1 | Q6PAJ1 | Breakpoint cluster region protein                                                                | Bcr        | mmu:110279    |   |
| 877 | 0.3009 | 0.0073 | 0.5582 | 0.3548 | 1 | Q62270 | 40S ribosomal protein S18                                                                        | Gm10260    | mmu:20084     |   |
| 878 | 0.1784 | 0.1156 | 0.9159 | 0.3581 | 1 | Q8BRW1 | Transporter: sodium- and chloride-dependent creatine transporter 1                               | Slc6a8     | mmu:102857    |   |
| 879 | 0.3926 | 0.5005 | 0.1912 | 0.3614 | 1 | Q3U2P1 | Protein transport protein Sec24A                                                                 | Sec24a     | mmu:77371     |   |
| 880 | 0.7673 | 0.1880 | 0.1477 | 0.3677 | 1 | Q9CPV7 | Cytosol aminopeptidase                                                                           | Lap3       | mmu:66988     |   |
| 881 | 0.2933 | 0.2894 | 0.5223 | 0.3683 | 1 | P51410 | 60S ribosomal protein L9                                                                         | Rpl9       | mmu:20005     |   |
| 882 | 0.6847 | 0.1795 | 0.2431 | 0.3691 | 1 | P70444 | BH3-interacting domain death agonist;BH3-interacting domain death agonist p15;BH3-interacting    | Bid        | mmu:12122     | 1 |
| 883 | 0.4616 | 0.5383 | 0.1096 | 0.3698 | 1 | Q9ERG2 | Striatin-3                                                                                       | Strn3      | mmu:94186     |   |
| 884 | 0.2249 | 0.4973 | 0.4008 | 0.3743 | 1 | Q9D358 | Low molecular weight phosphotyrosine protein phosphatase                                         | Acp1       | mmu:11431     |   |
| 885 | 0.1122 | 0.9538 | 0.0901 | 0.3754 | 1 | Q70252 | Heme oxygenase 2                                                                                 | Hmox2      | mmu:15369     | 1 |
| 886 | 0.0827 | 0.7630 | 0.2955 | 0.3797 | 1 | P62889 | 60S ribosomal protein L30                                                                        | Rpl30      | mmu:19946     |   |
| 887 | 0.3406 | 0.3574 | 0.4422 | 0.3801 | 1 | P97798 | Neogenin                                                                                         | Neo1       |               |   |
| 888 | 0.1557 | 0.1828 | 0.8057 | 0.3807 | 1 | Q9BG09 | Eukaryotic translation initiation factor 4B                                                      | Eif4b      | mmu:75705     |   |
| 889 | 0.1210 | 0.5032 | 0.5293 | 0.3845 | 1 | Q61792 | UIM and SH3 domain protein 1                                                                     | Lasp1      | mmu:16796     |   |
| 890 | 0.9629 | 0.9629 | 0.1817 | 0.3863 | 1 | Q70378 | ER membrane protein complex subunit 8                                                            | Emc8       | mmu:18117     |   |
| 891 | 0.7181 | 0.4520 | 0.3937 | 0.3937 | 1 | Q9CPR1 | RWD domain-containing protein 4                                                                  | Rwdd4,Rw   | mmu:192174    |   |
| 892 | 0.4597 | 0.1150 | 0.6103 | 0.3950 | 1 | Q9CWF9 | Golgin subfamily A member 1                                                                      | Golga1     | mmu:76899     |   |
| 893 | 0.2239 | 0.5607 | 0.4110 | 0.3985 | 1 | Q5BU09 | E2F-associated phosphoprotein                                                                    | Eapp       | mmu:66266     |   |
| 894 | 0.6745 | 0.2427 | 0.2791 | 0.3988 | 1 | Q8KT24 | Ubiquinol-cytochrome-c reductase complex assembly factor 3                                       | Uqcq3      | mmu:107197    |   |
| 895 | 0.4645 | 0.3834 | 0.3533 | 0.4004 | 1 | Q6Q972 | Histone-binding protein RBBP4                                                                    | Rbbp4      | mmu:19646     |   |
| 896 | 0.1790 | 0.2486 | 0.7799 | 0.4023 | 1 | Q8K019 | Bcl-2-associated transcription factor 1                                                          | Bclaf1     | mmu:72567     |   |
| 897 | 0.4550 | 0.6000 | 0.2096 | 0.4082 | 1 | Q6PDLO | Cytoplasmic dynein 1 light intermediate chain 2                                                  | Dync2i2    | mmu:234663    | 1 |
| 898 | 0.3909 | 0.4156 | 0.4209 | 0.4081 | 1 | Q6PF67 | Exocyst complex component 8                                                                      | Exoc8      | mmu:102058    |   |
| 899 | 1.0058 | 0.0474 | 0.1752 | 0.4095 | 1 | Q91W28 | Dysbindin                                                                                        | Dtnbp1     | mmu:94245     |   |
| 900 | 0.5915 | 0.6322 | 0.4113 | 0.4113 | 1 | Q92089 | FACT complex subunit SPT16                                                                       | Supt16,Suq | mmu:114741    |   |
| 901 | 0.5856 | 0.4566 | 0.1922 | 0.4115 | 1 | Q6Q973 | Histone-binding protein RBBP7                                                                    | Rbbp7      | mmu:245688    |   |
| 902 | 0.2038 | 0.2737 | 0.7581 | 0.4119 | 1 | Q77MB8 | Cytoplasmic FMR1-interacting protein 1;Cytoplasmic FMR1-interacting protein 2                    | Cyfp1,Cyfi | mmu:20430     |   |
| 903 | 1.1059 | 0.0652 | 0.0705 | 0.4122 | 1 | Q31125 | Zinc transporter SLC39A7                                                                         | Slc39a7    | mmu:14977     |   |
| 904 | 0.2059 | 0.7392 | 0.3180 | 0.4210 | 1 | Q8C187 | Septin-11                                                                                        | Sept11     | mmu:52398     |   |
| 905 | 0.2324 | 0.5521 | 0.4800 | 0.4215 | 1 | P34022 | Ran-specific GTPase-activating protein                                                           | Ranbp1     | mmu:19385     |   |
| 906 | 0.2362 | 0.5587 | 0.4748 | 0.4232 | 1 | Q9CR51 | V-type proton ATPase subunit G 1                                                                 | Atpvx1g1   | mmu:66290     |   |
| 907 | 0.4724 | 0.2450 | 0.5535 | 0.4236 | 1 | Q55131 | Septin-7                                                                                         | Sept7      | mmu:235072    |   |
| 908 | 0.4413 | 0.8780 | 0.8280 | 0.4259 | 1 | Q8BS97 | Becrin-1                                                                                         | Becn1      | mmu:55208     | 1 |
| 909 | 0.9842 | 0.2856 | 0.4267 | 0.4267 | 1 | Q61584 | Fragile X mental retardation syndrome-related protein 1                                          | Fxr1       | mmu:14359     | 1 |
| 910 | 0.3985 | 0.6118 | 0.0713 | 0.4272 | 1 | Q6NVE8 | WD repeat-containing protein 44                                                                  | Wdr44      | mmu:72404     |   |
| 911 | 0.3662 | 0.7197 | 0.2124 | 0.4328 | 1 | Q5QAM2 |                                                                                                  | Pdp2       | mmu:382051    |   |
| 912 | 0.6115 | 0.1126 | 0.5759 | 0.4333 | 1 | Q71F05 | E3 ubiquitin-protein ligase ZNRF2                                                                | Znrf2      | mmu:387524    | 1 |
| 913 | 0.4769 | 0.4334 | 0.3901 | 0.4335 | 1 | Q9WUJ8 | TNFAIP3-interacting protein 1                                                                    | Tnrip1     | mmu:57783     |   |
| 914 | 0.5126 | 0.0591 | 0.7286 | 0.4335 | 1 | Q91V04 | Translocating chain-associated membrane protein 1                                                | Tram1      | mmu:72265     |   |
| 915 | 0.1294 | 0.7238 | 0.4479 | 0.4337 | 1 | Q9DAU1 | Protein canopy homolog 3                                                                         | Cnp3       | mmu:72029     |   |
| 916 | 0.3499 | 0.6106 | 0.3528 | 0.4398 | 1 | Q8K409 | Protein HEXIM1                                                                                   | Hexim1     | mmu:192231    |   |
| 917 | 0.2088 | 0.1253 | 0.9082 | 0.4401 | 1 | Q62179 | Semaphorin-4B                                                                                    | Sema4b     | mmu:20352     |   |
| 918 | 0.4000 | 0.6182 | 0.4415 | 0.4415 | 1 | Q6K325 | 40S ribosomal protein S10                                                                        | Rps10      | mmu:67697     |   |
| 919 | 0.2159 | 0.6228 | 0.4868 | 0.4418 | 1 | Q9CR29 | Colicoid-coil domain-containing protein 43                                                       | Cdc43      | mmu:52715     |   |
| 920 | 0.0566 | 0.7615 | 0.5254 | 0.4458 | 1 | Q6ZVY3 | 40S ribosomal protein S27;40S ribosomal protein S27-like                                         | Rps27l     | mmu:14225     |   |
| 921 | 0.4805 | 0.2977 | 0.5604 | 0.4462 | 1 | P26883 | Peptidyl-prolyl cis-trans isomerase FKBP1A;Peptidyl-prolyl cis-trans isomerase                   | Fkbp1a     | mmu:14225     |   |
| 922 | 0.3179 | 0.0957 | 0.9433 | 0.4523 | 1 | Q9Z2J3 | CAP-Gly domain-containing linker protein 1                                                       | Cllp1      | mmu:56430     |   |
| 923 | 0.2452 | 0.8150 | 0.3002 | 0.4535 | 1 | P62869 | Transcription elongation factor B polypeptide 2                                                  | Tceb2      | mmu:67673     | 1 |
| 924 | 0.1706 | 0.1000 | 1.1660 | 0.4570 | 1 | Q9DOW5 | Peptidyl-prolyl cis-trans isomerase-like 1                                                       | Ppil1      | mmu:68816     |   |
| 925 | 0.4443 | 0.1048 | 0.8387 | 0.4626 | 1 | Q8C754 | Vacuolar protein sorting-associated protein 52 homolog                                           | Vps52      | mmu:224705    |   |
| 926 | 0.7575 | 0.6227 | 0.4897 | 0.4697 | 1 | Q9WV32 | Actin-related protein 2/3 complex subunit 1B                                                     | Arpc1b     | mmu:11867     |   |
| 927 | 0.7513 | 0.4057 | 0.4975 | 0.4702 | 1 | Q6Q598 | Src substrate cortactin                                                                          | Cctc       | mmu:113043    |   |
| 928 | 0.9025 | 0.4754 | 0.4786 | 0.4786 | 1 | Q8H845 | Gamma-tubulin complex component 5                                                                | Tubgp5     | mmu:23276     |   |
| 929 | 0.4592 | 0.2306 | 0.7525 | 0.4808 | 1 | P63330 | Serine/threonine-protein phosphatase 2A catalytic subunit alpha isoform;Serine/threonine-protein | Ppp2ca,Pp  | mmu:19052     | 1 |
| 930 | 0.6134 | 0.6333 | 0.4901 | 0.4901 | 1 | Q9QZD9 | Eukaryotic translation initiation factor 3 subunit 1                                             | Eif3       | mmu:54709     | 1 |
| 931 | 1.0248 | 0.1639 | 0.2888 | 0.4925 | 1 | Q9DCA2 | 28S ribosomal protein S11, mitochondrial                                                         | Mrps11     |               |   |
| 932 | 0.2596 | 0.8321 | 0.4110 | 0.5009 | 1 | Q9CXP8 | Guanine nucleotide-binding protein G(I)/G(S)/G(O) subunit gamma-10                               | Gng10      | mmu:14700     |   |
| 933 | 0.2459 | 0.8986 | 0.3605 | 0.5017 | 1 | Q8R146 | Acylation-acid-releasing enzyme                                                                  | Apeh       | mmu:235606    |   |
| 934 | 0.2475 | 0.5506 | 0.7167 | 0.5049 | 1 | Q6N0X0 | Protein WWC2                                                                                     | Wwc2       | mmu:52357     |   |
| 935 | 0.5432 | 0.1055 | 0.8663 | 0.5050 | 1 | Q8K2Y9 | Cerebral cavernous malformations protein 2 homolog                                               | Ccm2       | mmu:216527    |   |
| 936 | 1.0319 | 0.0728 | 0.4629 | 0.5080 | 1 | P35980 | 60S ribosomal protein L18                                                                        | Rpl18      | mmu:19899     |   |
| 937 | 0.7798 | 0.0728 | 0.6818 | 0.5113 | 1 | Q3JF22 | Piezoe-type mechanosensitive ion channel component 1;Piezo-type mechanosensitive ion channel     | Piezo1     |               |   |
| 938 | 0.2927 | 0.7932 | 0.4822 | 0.5115 | 1 | Q923G2 | DNA-directed RNA polymerases I, II, and III subunit RPABK3                                       | Rpb2h      | mmu:245841    |   |
| 939 | 0.7457 | 0.7932 | 0.7833 | 0.5154 | 1 | Q6NVE9 | Protein phosphatase PTC7 homolog                                                                 | Ptc7       | mmu:320717    | 1 |
| 940 | 0.7015 | 0.6553 | 0.1917 | 0.5162 | 1 | Q8K124 | Pleckstrin homology domain-containing family O member 2                                          | Plekho2    | mmu:102595    |   |
| 941 | 1.0448 | 0.2530 | 0.2516 | 0.5165 | 1 | Q4VB02 | Transmembrane anterior posterior transformation protein 1                                        | Tapt1      | mmu:231225    |   |
| 942 | 0.2158 | 0.7360 | 0.6042 | 0.5187 | 1 | Q6N2N1 | Protein arginine N-methyltransferase 6                                                           | Prmt6      | mmu:99890     |   |
| 943 | 0.6692 | 0.2917 | 0.5966 | 0.5192 | 1 | Q5SFM8 | RNA-binding protein 27                                                                           | Rbm27      | mmu:225432    |   |
| 944 | 0.6955 | 0.7479 | 0.1343 | 0.5259 | 1 | A2A432 | Cullin-4B                                                                                        | Cul4b      | mmu:72584     | 1 |
| 945 | 0.6404 | 0.3404 | 0.6000 | 0.5309 | 1 | Q8BH43 | Wiskott-Aldrich syndrome protein family member 2                                                 | Wsf2       | mmu:242687    |   |
| 946 | 0.5150 | 0.7657 | 0.3160 | 0.5322 | 1 | Q9JHQ5 | Leucine zipper transcription factor-like protein 1                                               | Lzf1       | mmu:93730     |   |
| 947 | 0.2346 | 0.4496 | 1.2148 | 0.5330 | 1 | Q6J216 | Double-strand break repair protein MRE11A                                                        | Mre11a     | mmu:17535     |   |
| 948 | 0.2571 | 0.9152 | 0.4350 | 0.5332 | 1 | Q5T2E7 | Nuclear fragile X mental retardation-interacting protein 2                                       | Nufip2     | mmu:6564      |   |
| 949 | 0.8396 | 0.1220 | 0.6545 | 0.5387 | 1 | Q8K4C2 | RUN and FYVE domain-containing protein 2                                                         | Rufy2      | mmu:70432     |   |
| 950 | 0.0966 | 0.8079 | 0.7213 | 0.5419 | 1 | Q3UHXC | 28 kDa heat- and acid-stable phosphoprotein                                                      | Pdp1       | mmu:231887    |   |
| 951 | 0.3133 | 0.7004 | 0.6296 | 0.5478 | 1 | Q9JKB1 | Ubiquitin carboxyl-terminal hydrolase isozyme L3;Ubiquitin carboxyl-terminal hydrolase isozyme L | Uchl3,Uchl | mmu:50933     |   |
| 952 | 0.4553 | 0.6127 | 0.5770 | 0.5483 | 1 | Q9QWY8 | ARF-GAP with SH3 domain, ANK repeat and PH domain-containing protein 1                           | Asap1      | mmu:13196     |   |
| 953 | 0.5244 | 0.6650 | 0.4757 | 0.5550 | 1 | Q8VC4E | Uncharacterized protein C9orf40 homolog                                                          | D030056L2  | mmu:225995    |   |
| 954 | 0.4182 | 0.8571 | 0.3919 | 0.5557 | 1 | Q9Z1W4 | Quinone oxidoreductase-like protein 1                                                            | Cryz1      | mmu:66609     |   |
| 955 | 0.0306 | 0.6628 | 0.9672 | 0.5562 | 1 | P02088 | Hemoglobin subunit beta-1;Hemoglobin subunit beta-2                                              | Hbb-b1,Hb  | mmu:15129     |   |
| 956 | 0.5397 | 0.6896 | 0.4487 | 0.5593 | 1 | Q3JUF4 | G patch domain-containing protein 11                                                             | Gpatch11   | mmu:53951     |   |
| 957 | 1.0168 | 0.0013 | 0.4774 | 0.5593 | 1 | P47962 | 60S ribosomal protein L5                                                                         | Rpl5       | mmu:100503670 |   |
| 958 | 0.6581 | 0.4220 | 0.6165 | 0.5654 | 1 | Q8VZK4 | Palmitoyltransferase ZDHHC5                                                                      | Zdhhc5     | mmu:228136    |   |
| 959 | 0.2598 | 0.2307 | 1.2061 | 0.5655 | 1 | Q91V11 | Autophagy-related protein 13                                                                     | Atg13      | mmu:51897     |   |
| 960 | 0.3515 | 0.6630 | 0.6844 | 0.5663 | 1 | B2RU88 | OTU domain-containing protein 7B                                                                 | Otd7b      | mmu:229603    |   |
| 961 | 0.9111 | 0.1746 | 0.6142 | 0.5666 | 1 | Q9Z0Y1 | Dynactin subunit 3                                                                               | Dctn3      | mmu:53598     |   |
| 962 | 0.2611 | 0.3846 | 1.0672 | 0.5710 | 1 | Q9CQX2 | Cytochrome b5 type B                                                                             | Cyb5b      | mmu:66427     |   |
| 963 | 0.2518 | 0.5579 | 0.9038 | 0.5712 | 1 | P97480 | Eyes absent homolog;Eyes absent homolog 3                                                        | Eya3       | mmu:14050     | 1 |
| 964 | 0.2923 | 0.6469 | 0.7862 | 0.5751 | 1 | P63158 | High mobility group protein B1                                                                   | Hmgb1      | mmu:15289     | 1 |
| 965 | 0.8377 | 0.3179 | 0.5804 | 0.5787 | 1 | Q3UMF0 | Cordon-bleu protein-like 1                                                                       | Cobl1      | mmu:319876    |   |
| 966 | 1.1999 | 0.1277 | 0.4208 | 0.5828 | 1 | P47963 | 60S ribosomal protein L13                                                                        | Rpl13      | mmu:270106    |   |
| 967 | 0.7925 | 0.4948 | 0.4696 | 0.5847 | 1 | Q55229 | Choline/ethanolamine kinase                                                                      | Chka       | mmu:12651     |   |
| 968 | 0.0000 | 1.0485 | 0.6907 | 0.5880 | 1 | Q6Q575 | Kinesin-like protein KIF18;Kinesin-like protein                                                  | Kif18      | mmu:16561     |   |
| 969 | 0.3332 | 0.9055 | 0.5407 | 0.5961 | 1 | Q9D6Z1 | Nuclear protein 56                                                                               | Np56       | mmu:67134     |   |
| 970 | 1.2895 | 0.4906 | 0.6002 | 0.6002 | 1 | Q8C689 | Active regulator of SIRT1                                                                        | Rps19bp1   | mmu:66538     |   |
| 971 | 0.3691 | 0.7842 | 0.6576 | 0.6036 | 1 | Q8VHH5 | Arf-GAP with GTPase, ANK repeat and PH domain-containing protein 3                               | Agap3      |               |   |
| 972 | 0.6325 | 0.9123 | 0.2744 | 0.6064 | 1 | E9PYH6 | Histone-lysine N-methyltransferase                                                               | Setd1a     | mmu:233904    | 1 |
| 973 | 0.3094 | 1.2803 | 0.2308 | 0.6068 | 1 | P68040 | Guanine nucleotide-binding protein subunit beta-2-like 1;Guanine nucleotide-binding protein sub  | Gnb2l1     | mmu:14694     |   |
| 974 | 0.3778 | 1.2561 | 0.1881 | 0.6073 | 1 | Q8CJF7 | Protein ELYS                                                                                     | Ahtct1     | mmu:226747    |   |
| 975 | 0.1641 | 0.8272 | 0.8346 | 0.6086 | 1 | Q8K4R9 | Disks large-associated protein 5                                                                 | Dlgap5     | mmu:218977    |   |
| 976 | 0.0796 | 0.5987 | 1.1829 | 0.6294 | 1 | P35550 | rRNA 2-O-methyltransferase fibrillarin                                                           | Fbl        | mmu:14113     |   |
| 977 | 0.5904 | 0.0013 | 0.3919 | 0.6279 | 1 | Q91V23 | Brain acid soluble protein 1                                                                     | Basp1      | mmu:70350     |   |
| 978 | 0.1327 | 0.7260 | 1.0499 | 0.6362 | 1 | Q8VC15 | Peroxisomal biogenesis factor 19                                                                 | Pex19      | mmu:19298     |   |
| 979 | 0.4516 | 0.7538 | 0.2059 | 0.6371 | 1 | Q55091 | Protein IMPACT                                                                                   | Impact     | mmu:16210     | 1 |
| 980 | 1.6141 | 0.3257 | 0.6490 | 0.6490 | 1 | Q9D8E6 | 60S ribosomal                                                                                    |            |               |   |



|      |        |        |        |        |        |                                   |                                                                                                            |            |            |
|------|--------|--------|--------|--------|--------|-----------------------------------|------------------------------------------------------------------------------------------------------------|------------|------------|
| 998  | 0.6637 | 1.5185 | 0.7335 | 1      | Q8BHL8 | Proteasome inhibitor Pi31 subunit | Psmf1                                                                                                      | mmu:228769 |            |
| 999  | 1.3940 | 0.5750 | 0.2443 | 0.7378 | 1      | Q9CQR2                            | 40S ribosomal protein S21                                                                                  | Rps21      | mmu:66481  |
| 1000 | 1.4207 | 0.5686 | 0.2418 | 0.7437 | 1      | P59840                            | DNA-directed RNA polymerase III subunit RPC2                                                               | Polr3b     | mmu:70428  |
| 1001 | 0.6652 | 0.7812 | 0.7945 | 0.7470 | 1      | Q8B8VU                            | Leucine-rich repeat and calponin homology domain-containing protein 3                                      | Lrch3      | mmu:70144  |
| 1002 | 0.7481 | 1.0189 | 0.4951 | 0.7540 | 1      | P47390                            | Fos-related antigen 2                                                                                      | Fosl2      | mmu:14284  |
| 1003 | 0.6168 | 0.7992 | 0.8326 | 0.7562 | 1      | P94899                            | Ribosomal protein L19;60S ribosomal protein L19                                                            | Rpl19      | mmu:19921  |
| 1004 | 0.4070 | 0.5327 | 1.3603 | 0.7661 | 1      | P45481                            | CREB-binding protein                                                                                       | Ctcfbp     |            |
| 1005 | 0.7663 | 1.0491 | 0.5510 | 0.7888 | 1      | Q9D2C6                            | DNA-directed RNA polymerase III subunit RPC8                                                               | Polr3h     | mmu:78929  |
| 1006 | 0.9373 | 0.6311 | 0.8007 | 0.7897 | 1      | Q6ZVV7                            | 60S ribosomal protein L35                                                                                  | Rpl35;Gm1  | mmu:66489  |
| 1007 | 0.3650 | 1.0517 | 0.9537 | 0.7901 | 1      | P62892                            | 60S ribosomal protein L39                                                                                  | Rpl39      | mmu:67248  |
| 1008 | 0.0722 | 1.1474 | 1.1632 | 0.7943 | 1      | Q9CWU4                            | UPF0690 protein C1orf52 homolog                                                                            | Z410004B1  | mmu:66421  |
| 1009 | 0.6676 | 0.8130 | 0.9379 | 0.8062 | 1      | Q03173                            | Protein enabled homolog                                                                                    | Enah       | mmu:13800  |
| 1010 | 1.2769 | 1.0398 | 0.1119 | 0.8095 | 1      | Q9CZM2                            | Ribosomal protein L15;60S ribosomal protein L15                                                            | Gm10020J   | mmu:66480  |
| 1011 | 0.4532 | 1.3336 | 0.6517 | 0.8128 | 1      | Q9OZH3                            | Peptidyl-prolyl cis-trans isomerase E                                                                      | Ppie       | mmu:56031  |
| 1012 | 0.8088 | 0.5749 | 1.0584 | 0.8140 | 1      | Q8QKX6                            | Autophagy-related protein 2 homolog B                                                                      | Atg2b      | mmu:76559  |
| 1013 | 0.0867 | 0.5180 | 1.8551 | 0.8196 | 1      | C099F0                            | CD99 antigen-like protein 2                                                                                | C099F2     | mmu:171486 |
| 1014 | 0.8409 | 0.6273 | 1.0187 | 0.8230 | 1      | Q7V5J2                            | Microtubule-associated protein 6                                                                           | Map6       | mmu:17760  |
| 1015 | 1.1295 | 0.7685 | 0.6047 | 0.8342 | 1      | P14206                            | 40S ribosomal protein SA                                                                                   | Rpsa       | mmu:16785  |
| 1016 | 0.6856 | 0.2081 | 1.6132 | 0.8376 | 1      | Q9WV96                            | Mitochondrial import inner membrane translocase subunit Tim10 B                                            | Timm10b    | mmu:14356  |
| 1017 | 0.5667 | 0.6940 | 1.2539 | 0.8382 | 1      | Q92103                            | Activity-dependent neuroprotector homeobox protein                                                         | Adnp       | mmu:11538  |
| 1018 | 1.5014 | 0.4221 | 0.6064 | 0.8433 | 1      | Q7TMX5                            | Protein SHQ1 homolog                                                                                       | Shq1       | mmu:72171  |
| 1019 | 0.1943 | 1.0124 | 1.3286 | 0.8451 | 1      | Q9WTJ4                            | Fit3-interacting zinc finger protein 1                                                                     | Fiz1       | mmu:23877  |
| 1020 | 1.8579 | 0.6141 | 0.6347 | 0.8456 | 1      | C09167                            | 60S ribosomal protein L21                                                                                  | Rpl21      |            |
| 1021 | 0.9201 | 0.1585 | 1.4659 | 0.8482 | 1      | Q9EP53                            | D-glucuronyl C5-epimerase                                                                                  | Glice      | mmu:93683  |
| 1022 | 1.2160 | 0.5807 | 0.7590 | 0.8539 | 1      | P19253                            | 60S ribosomal protein L13a                                                                                 | Rpl13a     | mmu:22121  |
| 1023 | 1.1327 | 0.8224 | 0.5339 | 0.8658 | 1      | Q9PAM1                            | Alpha-taxilin                                                                                              | Txlna      | mmu:109658 |
| 1024 | 0.8402 | 0.8492 | 1.7938 | 0.8852 | 1      | Q8BKK1                            | Brain-specific angiogenesis inhibitor 1-associated protein 2                                               | Baiap2     | mmu:108100 |
| 1025 | 1.3349 | 0.7081 | 0.6844 | 0.9091 | 1      | Q6P6L0                            | Filamin A-interacting protein 1-like                                                                       | Filip1l    |            |
| 1026 | 0.7093 | 0.8679 | 1.1551 | 0.9108 | 1      | Q8QC02                            | Vacuolar protein sorting-associated protein 26B                                                            | Vps26b     | mmu:69091  |
| 1027 | 1.6152 | 0.5964 | 0.6411 | 0.9509 | 1      | Q9ER67                            |                                                                                                            | Maged2     | mmu:80884  |
| 1028 | 0.2890 | 1.5797 | 1.0818 | 0.9835 | 1      | P63073                            | Eukaryotic translation initiation factor 4E                                                                | Eif4e      | mmu:13684  |
| 1029 | 0.1827 | 2.0287 | 0.7921 | 1.0012 | 1      | Q35071                            | Kinesin-like protein;Kinesin-like protein KIF1C                                                            | Kif1c      | mmu:16562  |
| 1030 | 1.0593 | 0.6685 | 1.3305 | 1.0194 | 1      | P10649                            | Glutathione S-transferase Mu 1                                                                             | Gstm1      | mmu:14862  |
| 1031 | 0.1897 | 0.4551 | 2.4747 | 1.0398 | 1      | P18572                            | Basigin                                                                                                    | Bsg        | mmu:12215  |
| 1032 | 0.4213 | 2.2238 | 0.6006 | 1.0819 | 1      | Q9DBM1                            | G patch domain-containing protein 1                                                                        | Gpatch1    | mmu:67471  |
| 1033 | 0.7719 | 0.6885 | 1.6043 | 1.0899 | 1      | Q8K287                            | Ubiquitin carboxyl-terminal hydrolase 45                                                                   | Usp45      | mmu:77591  |
| 1034 | 0.1478 | 2.0306 | 1.1227 | 1.1094 | 1      | P49769                            | Presenilin-1;Presenilin-1 NTF subunit;Presenilin-1 CTF subunit;Presenilin-1 CTF12                          | Psen1      | mmu:19164  |
| 1035 | 1.0482 | 0.7767 | 1.5376 | 1.1208 | 1      | Q8C619                            | Latent-transforming growth factor beta-binding protein 1                                                   | Ltbp1      | mmu:268977 |
| 1036 | 2.3992 | 0.7477 | 0.2776 | 1.1415 | 1      | Q8BVA0                            | N-acetylgalactosaminyltransferase 7                                                                        | Galn7      | mmu:108150 |
| 1037 | 1.8928 | 1.3151 | 0.2167 | 1.1415 | 1      | Q9QYH6                            | Melanoma-associated antigen D1                                                                             | Maged1     | mmu:94275  |
| 1038 | 2.1330 | 0.5576 | 0.7504 | 1.1470 | 1      | P14148                            | 60S ribosomal protein L7                                                                                   | Rpl7       | mmu:19989  |
| 1039 | 1.4714 | 0.7692 | 1.2238 | 1.1548 | 1      | P62918                            | 60S ribosomal protein L8                                                                                   | Rpl8       | mmu:26961  |
| 1040 | 2.6397 | 0.3061 | 0.6540 | 1.1999 | 1      | P47911                            | 60S ribosomal protein L6                                                                                   | Rpl6;Gm54  | mmu:19988  |
| 1041 | 1.8524 | 1.8193 | 0.0936 | 1.2458 | 1      | Q8B0TE                            | RNA polymerase II-associated protein 1                                                                     | Rpap1      | mmu:68925  |
| 1042 | 0.5689 | 1.8039 | 1.3580 | 1.2709 | 1      | Q0P688                            |                                                                                                            | Eif4e2     |            |
| 1043 | 1.7918 | 0.2344 | 1.8380 | 1.2909 | 1      | Q3UAI6                            | Kinetochore protein Spc25                                                                                  | Spc25      | mmu:66442  |
| 1044 | 1.6431 | 0.5434 | 0.7504 | 1.3151 | 1      | Q8K1L5                            | Protein phosphatase 1 regulatory subunit 11                                                                | Ppp1r11    | mmu:76497  |
| 1045 | 1.3493 | 1.7594 | 1.5275 | 1.4787 | 1      | Q3UWT1                            | Protein phosphatase 1 regulatory subunit 12C                                                               | Ppp1r12c   | mmu:232807 |
| 1046 | 2.8558 | 1.3210 | 0.4081 | 1.5283 | 1      | Q8B0U7                            | Vacuolar protein sorting-associated protein 37B                                                            | Vps37b     | mmu:330192 |
| 1047 | 0.0413 | 4.7907 | 0.4590 | 1.7637 | 1      | Q8BFZ3                            | Beta-actin-like protein 2                                                                                  | Actb2      | mmu:238880 |
| 1048 | 4.2026 | 0.8901 | 0.5344 | 1.8757 | 1      | Q9E0H8                            | 39S ribosomal protein L46, mitochondrial                                                                   | Mrlp46     | mmu:67308  |
| 1049 | 0.9647 | 2.2964 | 3.6969 | 2.3193 | 1      | Q9CQZ0                            | ORM1-like protein 2;ORM1-like protein 1                                                                    | Gm28778J   | mmu:66844  |
| 1050 | 0.6585 | 0.1422 | 0.0435 | 0.9552 | 1      | Q09995                            | Cyclin-dependent kinase 9                                                                                  | Cdk9       | mmu:107951 |
| 1051 | 0.3741 | 0.6619 | 0.8765 | 0.8486 | 1      | P52332                            | Tyrosine-protein kinase;Tyrosine-protein kinase JAK1                                                       | Jak1       |            |
| 1052 | 0.3761 | 1.1360 | 0.9331 | 0.7924 | 1      | Q63184                            | Maternal embryonic leucine zipper kinase                                                                   | Melk       | mmu:17279  |
| 1053 | 0.7051 | 0.0980 | 0.4464 | 0.7218 | 1      | Q0P522                            | Platelet-derived growth factor receptor beta                                                               | Pdgfrb     | mmu:18596  |
| 1054 | 0.7081 | 0.2126 | 0.4689 | 0.7488 | 1      | Q8CQF0                            | Serine/threonine-protein kinase greatwall                                                                  | Greatw     | mmu:67121  |
| 1055 | 0.2285 | 0.1663 | 0.3802 | 0.4529 | 1      | Q49025                            | Citron Rho-interacting kinase                                                                              | Cit        |            |
| 1056 | 1.2415 | 0.1049 | 1.5316 | 0.4394 | 1      | Q42A56                            | Titin                                                                                                      | Ttn        |            |
| 1057 | 0.0961 | 1.1508 | 0.5087 | 0.3237 | 1      | P728867                           | Protein kinase C;Protein kinase C delta type;Protein kinase C delta type regulatory subunit;Protein Prickd | Pricd      | mmu:18753  |
| 1058 | 0.7051 | 0.7135 | 0.3066 | 0.2823 | 1      | Q3U0U6                            | Non-specific serine/threonine protein kinase;Serine/threonine-protein kinase MRCK alpha                    | Cdc42bpa   |            |
| 1059 | 0.1800 | 0.0879 | 0.2046 | 0.2161 | 1      | Q8BWW9                            | Serine/threonine-protein kinase N2                                                                         | Pkn2       | mmu:109333 |
| 1060 | 0.0752 | 0.7628 | 0.5865 | 0.2053 | 1      | P05132                            | cAMP-dependent protein kinase catalytic subunit alpha                                                      | Prkaca     | mmu:18747  |
| 1061 | 0.1373 | 0.5175 | 0.1234 | 0.1901 | 1      | Q7T5E6                            | Serine/threonine-protein kinase 38-like                                                                    | Slk38l     | mmu:232533 |
| 1062 | 0.0821 | 0.7360 | 0.4610 | 0.1566 | 1      | Q9D2Y4                            | Mixed lineage kinase domain-like protein                                                                   | Mlll       | mmu:74568  |
| 1063 | 0.4536 | 0.4253 | 0.1305 | 0.4543 | 1      | Q9WV57                            | Dual specificity mitogen-activated protein kinase kinase 5                                                 | Map2k5     | mmu:23938  |
| 1064 | 0.2010 | 1.0197 | 0.1517 | 0.1517 | 1      | Q8B0U7                            | Cyclin-dependent kinase 17                                                                                 | Cdk17      | mmu:217469 |
| 1065 | 0.0416 | 0.0633 | 0.1380 | 0.1407 | 1      | Q03145                            | Ephrin type-A receptor 2                                                                                   | Epha2      | mmu:13836  |
| 1066 | 0.2481 | 0.2699 | 0.4746 | 0.1252 | 1      | Q03963                            | Interferon-induced, double-stranded RNA-activated protein kinase                                           | Eif2ak2    | mmu:19106  |
| 1067 | 0.3512 | 0.1461 | 0.3275 | 0.1024 | 1      | P83741                            | Serine/threonine-protein kinase WNK1                                                                       | Wnk1       | mmu:232341 |
| 1068 | 0.0433 | 0.0875 | 0.6517 | 0.0943 | 1      | Q9WV60                            | Glycogen synthase kinase-3 beta                                                                            | Gsk3b      | mmu:56637  |
| 1069 | 0.5739 | 0.9664 | 1.1812 | 0.0904 | 1      | Q9JLM8                            | Serine/threonine-protein kinase DCLK1                                                                      | Dclk1      | mmu:13175  |
| 1070 | 0.0433 | 0.6355 | 0.9121 | 0.0834 | 1      | Q70293                            | G protein-coupled receptor kinase 6                                                                        | Grk6       | mmu:26385  |
| 1071 | 0.0745 | 0.7668 | 0.1478 | 0.0699 | 1      | Q8B8N21                           | Serine/threonine-protein kinase VRK2                                                                       | Vrk2       | mmu:69922  |
| 1072 | 0.3082 | 0.5546 | 0.5267 | 0.0699 | 1      | Q8B8C8                            | Phosphatidylinositol 4-kinase beta                                                                         | Pik4b      | mmu:107650 |
| 1073 | 0.4357 | 0.3473 | 0.1581 | 0.0698 | 1      | Q24768                            | Cyclin-dependent kinase 11B                                                                                | Cdk11b     | mmu:12537  |
| 1074 | 0.4357 | 0.3473 | 0.1581 | 0.0698 | 1      | Q6A063                            | Cyclin-dependent kinase 6                                                                                  | Cdk6       | mmu:51571  |
| 1075 | 0.1699 | 0.0548 | 0.1394 | 0.0519 | 1      | P31938                            | Dual specificity mitogen-activated protein kinase kinase 1                                                 | Map2k1     | mmu:26395  |
| 1076 | 0.9190 | 0.2569 | 1.3094 | 0.0371 | 1      | P31750                            | RAC-alpha serine/threonine-protein kinase                                                                  | Akt1       | mmu:11651  |
| 1077 | 0.1188 | 0.5661 | 1.3956 | 0.0276 | 1      | P18654                            | Ribosomal protein S6 kinase alpha-3                                                                        | Rps6ka3    | mmu:110651 |
| 1078 | 0.1188 | 0.5661 | 1.3956 | 0.0276 | 1      | Q8BPM2                            | Mitogen-activated protein kinase kinase kinase kinase;Mitogen-activated protein kinase kinase kinase kin   | Map4k5     | mmu:399510 |
| 1079 | 0.8918 | 0.0478 | 0.3320 | 0.0276 | 1      | Q8K1R7                            | Serine/threonine-protein kinase Nek9                                                                       | Nek9       | mmu:217718 |
| 1080 | 0.2192 | 0.1172 | 0.1553 | 0.0276 | 1      | Q69238                            | Pseudopodium-enriched atypical kinase 1                                                                    | Peak1      | mmu:244895 |
| 1081 | 0.2967 | 0.3057 | 0.3329 | 0.0276 | 1      | Q60751                            | Tyrosine-protein kinase receptor;insulin-like growth factor 1 receptor;insulin-like growth factor 1        | Igf1r      | mmu:16001  |
| 1082 | 0.1789 | 1.1785 | 0.1240 | 0.0276 | 1      | Q92H22                            | [Pyruvate dehydrogenase [acetyl-transferring]] kinase isozyme 3, mitochondrial                             | Pkg3       | mmu:236900 |
| 1083 | 0.3784 | 0.2825 | 0.9239 | 0.0276 | 1      | Q2N4L51                           | Glycogen synthase kinase-3 alpha                                                                           | Gsk3a      | mmu:66606  |
| 1084 | 0.3784 | 0.2825 | 0.9239 | 0.0276 | 1      | Q9JLU3                            | Phosphatidylinositol 5-phosphate 4-kinase type-2 gamma                                                     | Pip4k2c    | mmu:17150  |
| 1085 | 0.3125 | 0.0035 | 0.3003 | 0.0276 | 1      | Q92289                            | Ribosomal protein S6 kinase alpha-4                                                                        | Rps6ka4    | mmu:56163  |
| 1086 | 0.0472 | 0.0471 | 0.3326 | 0.0276 | 1      | P54761                            | Receptor protein-tyrosine kinase;Ephrin type-B receptor 4                                                  | Ephb4      | mmu:13846  |
| 1087 | 0.1006 | 0.0681 | 0.1036 | 0.0276 | 1      | Q0K0L2                            | Triple functional domain protein                                                                           | Trio       | mmu:223435 |
| 1088 | 1.8934 | 0.3645 | 0.1709 | 0.0446 | 1      | Q9D0L4                            | Uncharacterized aarF domain-containing protein kinase 1                                                    | Adck1      | mmu:72113  |
| 1089 | 0.0632 | 0.0695 | 0.3297 | 0.0475 | 1      | Q61136                            | Serine/threonine-protein kinase PRP4 homolog                                                               | Prpf4b     | mmu:19134  |
| 1090 | 0.2645 | 0.2601 | 0.1901 | 0.0641 | 1      | Q6P9R2                            | Serine/threonine-protein kinase OSR1                                                                       | Osr1       | mmu:108737 |
| 1091 | 0.4755 | 0.4402 | 0.3533 | 0.0872 | 1      | Q8CEE6                            | PAS domain-containing serine/threonine-protein kinase                                                      | Pask       | mmu:269924 |
| 1092 | 0.0888 | 0.1538 | 0.2945 | 0.1130 | 1      | P97377                            | Cyclin-dependent kinase 2                                                                                  | Cdk2       | mmu:12566  |
| 1093 | 0.4682 | 0.4027 | 0.0398 | 0.1193 | 1      | P70336                            | Rho-associated protein kinase 2;Rho-associated protein kinase                                              | Rock2      | mmu:19878  |
| 1094 | 0.4874 | 0.4772 | 0.4335 | 0.1597 | 1      | Q91V58                            | Calcium/calmodulin-dependent protein kinase type 1;Calcium/calmodulin-dependent protein kin                | Camk1;Car  | mmu:52163  |
| 1095 | 0.1337 | 0.2066 | 0.3216 | 0.1510 | 1      | Q9J110                            | Serine/threonine-protein kinase 3;Serine/threonine-protein kinase 3 36kDa subunit;Serine/threor            | Slk3       | mmu:56274  |
| 1096 | 1.1337 | 0.0933 | 0.7439 | 0.1579 | 1      | Q6Q209                            | Serine/threonine-protein kinase TAO2                                                                       | Tao2       | mmu:381921 |
| 1097 | 0.0634 | 0.3579 | 0.7366 | 0.1671 | 1      | Q63932                            | Dual specificity mitogen-activated protein kinase kinase 2                                                 | Map2k2     | mmu:26396  |
| 1098 | 0.4364 | 0.0813 | 0.5886 | 0.1759 | 1      | Q9EQC5                            | N-terminal kinase-like protein                                                                             | Scy1       | mmu:78891  |
| 1099 | 0.2559 | 0.2530 | 0.2898 | 0.1771 | 1      | P47809                            | Dual specificity mitogen-activated protein kinase kinase 4                                                 | Map2k4     | mmu:26398  |
| 1100 | 0.6633 | 0.0391 | 0.2865 | 0.1792 | 1      | Q9J078                            | Lymphokine-activated killer T-cell-originated protein kinase                                               | Pbk        | mmu:52033  |
| 1101 | 0.0842 | 0.0786 | 0.3567 | 0.1884 | 1      | Q99KY4                            | Cyclin-G-associated kinase                                                                                 | Gck        | mmu:231580 |
| 1102 | 0.2427 | 0.8467 | 0.1900 | 0.1900 | 1      | Q71750                            | Serine/threonine-protein kinase MRCK beta                                                                  | Cdc42bpb   | mmu:217866 |
| 1103 | 0.3227 | 0.2778 | 0.4576 | 0.1892 | 1      | Q54781                            | SRSF protein kinase 2;SRSF protein kinase 2 N-terminal;SRSF protein kinase 2 C-terminal                    | Srpk2      | mmu:20817  |
| 1104 | 0.3227 | 0.2778 | 0.4576 | 0.1892 | 1      | P68181                            | cAMP-dependent protein kinase catalytic subunit beta                                                       | Prkab1     | mmu:18749  |
| 1105 | 0.0443 | 0.3770 | 0.2188 | 0.2188 | 1      | Q63844                            | Mitogen-activated protein kinase 3;Mitogen-activated protein kinase                                        | Mapk3      | mmu:26417  |
| 1106 | 0.3895 | 0.3868 | 0.0677 | 0.2281 | 1      | Q9J111                            | Serine/threonine-protein kinase 4;Serine/threonine-protein kinase 4 37kDa subunit;Serine/threor            | Slk4       | mmu:58231  |
| 1107 | 1.4151 | 0.1552 | 1.0224 | 0.2416 | 1      | Q61083                            | Mitogen-activated protein kinase kinase kinase 2                                                           | Map3k2     |            |
| 1108 | 0.1618 | 0.5961 | 0.1058 | 0.2456 | 1      | P49615                            | Cyclin-dependent-like kinase 5                                                                             | Cdk5       | mmu:12568  |
| 1109 | 0.2059 | 0.1162 | 0      |        |        |                                   |                                                                                                            |            |            |

|      |         |         |         |
|------|---------|---------|---------|
| 1124 | 0.1793  | 0.1847  | 0.5102  |
| 1125 | 1.2407  | -0.1391 | -0.2554 |
| 1126 | 1.3991  | 0.0787  | 0.8381  |
| 1127 | 0.8513  | 0.4672  | -0.1325 |
| 1128 | 0.5419  | -0.5997 | -0.1159 |
| 1129 | 0.4864  | -0.4149 | -0.2645 |
| 1130 | 1.7124  | 0.4323  | -0.5498 |
| 1131 | 0.6352  | -0.2626 | -0.5123 |
| 1132 | -0.0331 | -0.7744 | 1.6606  |
| 1133 | -0.8571 | 0.3169  | 0.3192  |
| 1134 | -1.9727 | -0.3219 | -0.0641 |
| 1135 | -0.9586 | -0.9827 | 0.2858  |
| 1136 | -0.2978 | -0.2400 | 1.1053  |
| 1137 | -3.5308 | 0.1204  | -1.6626 |
| 1138 | -0.8158 | 0.2590  | -1.7890 |
| 1139 | -0.4288 | 0.4524  | -1.4943 |
| 1140 | -1.3880 | -0.1835 | -0.6996 |
| 1141 | -1.3649 | -0.0000 | -0.5402 |
| 1142 | -0.1159 | -1.2589 | -2.3423 |
| 1143 | -0.1102 | -0.0416 | -1.2504 |
| 1144 | 0.2745  | -0.0171 | -0.3516 |
| 1145 | -0.4702 | 0.1378  | 0.1891  |
| 1146 | -0.5479 | 0.3348  | -1.2018 |
| 1147 | -4.7309 | 0.7459  | -0.5698 |
| 1148 | -0.3927 | -0.1762 | -0.6591 |
| 1149 | -1.4424 | 0.4008  | -0.3822 |
| 1150 | -2.7415 | 0.2130  | -0.1754 |
| 1151 | 1.0783  | -0.0000 | -0.3726 |
| 1152 | 1.1665  | -0.2817 | -0.5258 |
| 1153 | 1.3620  | -0.3155 | -1.0739 |
| 1154 | -0.0746 | -0.0000 | 0.4151  |
| 1155 | -0.3904 | -0.0000 | -1.4620 |
| 1156 | -0.2722 | -0.6148 | -0.9702 |
| 1157 | -2.1656 | -0.1988 | -0.3852 |
| 1158 | 0.2147  | -0.3515 | -0.7737 |
| 1159 | -0.4075 | 0.6925  | -0.5261 |
| 1160 | -3.8251 | -0.6526 | -0.5126 |
| 1161 | 1.2923  | -0.8461 | -1.2705 |
| 1162 | 0.4453  | -0.3790 | -1.9878 |
| 1163 | 0.2596  | 0.9524  | -0.4317 |
| 1164 | -2.5682 | 0.2991  | -1.5825 |
| 1165 | -0.8992 | 0.2178  | -2.6880 |
| 1166 | -1.7319 | -0.6295 | -0.3186 |
| 1167 | 0.7619  | -0.5831 | -0.7734 |
| 1168 | -0.9852 | -0.1046 | -0.0019 |
| 1169 | -1.7251 | -0.3907 | -0.2821 |
| 1170 | -0.8705 | -0.0000 | -0.8778 |
| 1171 | -0.0670 | -0.1818 | -1.1524 |
| 1172 | -0.9180 | -0.3350 | -1.8210 |
| 1173 | -0.0416 | -0.3885 | -1.5355 |
| 1174 | -1.0341 | 0.1647  | 0.5330  |
| 1175 | -0.2653 | -1.0081 | 0.1016  |
| 1176 | -0.2428 | 0.7782  | -1.3991 |
| 1177 | -2.0826 | -0.5908 | -1.0514 |
| 1178 | -0.5447 | -0.2477 | -1.1081 |
| 1179 | -0.0888 | -1.1170 | -0.2184 |
| 1180 | -0.3705 | -0.6269 | -0.6561 |
| 1181 | -1.7330 | -0.6879 | -0.8001 |
| 1182 | -2.5145 | -0.2779 | -1.3204 |
| 1183 | -1.4116 | -0.6888 | -0.3641 |
| 1184 | 0.9982  | -0.0000 | -0.5547 |
| 1185 | -0.6799 | 0.1235  | -1.2650 |
| 1186 | -0.1427 | -1.4190 | -0.1309 |
| 1187 | -1.2897 | 0.2512  | -0.4357 |
| 1188 | -0.6521 | -0.1806 | -0.9937 |
| 1189 | -0.4518 | 0.3650  | -0.3466 |
| 1190 | -2.6691 | -0.0000 | -0.2387 |
| 1191 | -0.1485 | -0.4469 | -1.3045 |
| 1192 | -1.2317 | -0.2815 | -1.2267 |
| 1193 | 0.6510  | -1.6001 | -0.0000 |
| 1194 | -0.0755 | 0.2923  | 0.3314  |
| 1195 | 0.4984  | -0.0000 | -1.4261 |
| 1196 | -0.3209 | 0.1000  | -1.2835 |
| 1197 | -1.0403 | 0.2044  | -0.8156 |
| 1198 | -0.5116 | -0.7041 | 0.3797  |
| 1199 | -1.7091 | -0.9281 | -0.8878 |
| 1200 | -1.1716 | -1.6689 | -0.4618 |
| 1201 | -0.9776 | -0.0674 | -0.3180 |
| 1202 | 1.4882  | -1.6930 | -0.8835 |
| 1203 | -0.0829 | -1.0521 | -0.0670 |
| 1204 | -0.1971 | -0.5035 | -0.1327 |
| 1205 | -0.0887 | -0.5866 | -1.1468 |
| 1206 | -0.5221 | -0.8046 | -0.1942 |
| 1207 | -0.7355 | 0.2735  | -0.5218 |
| 1208 | -0.7210 | -0.9685 | -0.3087 |
| 1209 | -0.6086 | -0.0707 | -0.7473 |
| 1210 | -0.2745 | 0.6502  | -0.7512 |
| 1211 | -0.6928 | -0.2821 | -1.8267 |
| 1212 | -0.1424 | -0.1155 | -0.3387 |
| 1213 | 0.4689  | 0.1605  | -0.1235 |
| 1214 | -0.9935 | 0.3613  | -1.0550 |
| 1215 | -0.4694 | 0.2642  | 0.2653  |
| 1216 | -0.6058 | -0.2283 | -0.1071 |
| 1217 | -0.8589 | 0.1817  | -0.7587 |
| 1218 | -1.6682 | 0.9787  | 0.1834  |
| 1219 | -0.1406 | -0.0000 | -0.3308 |
| 1220 | -0.4314 | -1.0728 | -0.3458 |
| 1221 | -0.1261 | -0.1353 | -0.6602 |
| 1222 | -0.3886 | 0.6587  | 0.3612  |
| 1223 | -0.7794 | -0.4020 | 0.1456  |
| 1224 | -1.6571 | 0.1458  | -0.9606 |
| 1225 | -0.3124 | 0.3553  | -1.2744 |
| 1226 | -0.8963 | -0.0000 | -0.1798 |
| 1227 | -0.0915 | -1.2091 | -0.4838 |
| 1228 | -0.3046 | -1.4581 | -0.1079 |
| 1229 | -0.6128 | -0.2326 | -0.6119 |
| 1230 | -1.3789 | -0.2326 | -2.3858 |
| 1231 | -0.1548 | -0.1568 | -0.2747 |
| 1232 | -0.4217 | -0.7623 | -1.0790 |
| 1233 | -1.1101 | 0.4744  | -0.6098 |
| 1234 | -0.6310 | 0.2419  | -0.9836 |
| 1235 | -3.2865 | -0.8780 | 1.0475  |
| 1236 | 1.2554  | -0.6675 | 1.1380  |
| 1237 | -0.7968 | -0.0000 | -0.3005 |
| 1238 | 0.2504  | -0.4448 | -1.1993 |
| 1239 | 0.5538  | -0.5270 | -1.9410 |
| 1240 | 0.1377  | -1.1785 | -0.5842 |
| 1241 | -0.1731 | -0.4569 | -0.4448 |
| 1242 | -0.2655 | 0.9413  | -0.6201 |
| 1243 | -0.0618 | 0.2487  | -0.2890 |
| 1244 | -0.0915 | 1.0519  | -1.3674 |
| 1245 | -0.4179 | 0.5740  | 0.2279  |
| 1246 | -0.6577 | 0.1595  | -0.0983 |
| 1247 | -0.2748 | 0.2177  | -0.8287 |
| 1248 | -1.4653 | -1.1027 | -1.2993 |
| 1249 | -0.4650 | 0.2544  | -0.5486 |

|   |         |                                                                                                 |
|---|---------|-------------------------------------------------------------------------------------------------|
| 0 | Q8K1Y2  | Protein kinase C;Serine/threonine-protein kinase;Serine/threonine-protein kinase D3             |
| 0 | E9Q3L2  |                                                                                                 |
| 0 | Q922Q2  | Serine/threonine-protein kinase RIO1                                                            |
| 0 | Q086F8  | Mitogen-activated protein kinase kinase kinase 4                                                |
| 0 | Q6P0N3  | Myosin light chain kinase, smooth muscle;Myosin light chain kinase, smooth muscle, deglutamylat |
| 0 | P07015  | Phosphatidylinositol 4-phosphate 5-kinase type-1 gamma                                          |
| 0 | P16056  | Receptor protein tyrosine kinase;Hepatocyte growth factor receptor                              |
| 0 | Q8H0V3  | Uncharacterized aarf domain-containing protein kinase 5                                         |
| 0 | P54071  | Isocitrate dehydrogenase [NADP], mitochondrial                                                  |
| 0 | P62774  | 40S ribosomal protein S29                                                                       |
| 0 | Q9E0J5  |                                                                                                 |
| 0 | Q9CZ88  | Elongation factor Ts, mitochondrial                                                             |
| 0 | P8VPZ5  |                                                                                                 |
| 0 | Q9JH59  | Spliceosome-associated protein CWC15 homolog                                                    |
| 0 | Q9Z5J1  | ATPase family AAA domain-containing protein 3                                                   |
| 0 | Q8K2F8  | Protein LSM14 homolog A                                                                         |
| 0 | P24527  | Leukotriene A-4 hydrolase                                                                       |
| 0 | P18760  | Cofilin-1                                                                                       |
| 0 | P48428  | Tubulin-specific chaperone A                                                                    |
| 0 | P18242  | Cathepsin D                                                                                     |
| 0 | Q8BG81  | Polymerase delta-interacting protein 3                                                          |
| 0 | Q9R053  | Sodium channel protein type 11 subunit alpha;Sodium channel protein;Sodium channel protein ty   |
| 0 | Q8BW71  | 3-ketoacyl-CoA thiolase, mitochondrial                                                          |
| 0 | P6Z855  | 40S ribosomal protein S26                                                                       |
| 0 | Q9CQU0  | Thioredoxin domain-containing protein 12                                                        |
| 0 | P24452  | Macrophage-capping protein                                                                      |
| 0 | E6PU45  | Kinesin-like protein                                                                            |
| 0 | P61255  | 60S ribosomal protein L26                                                                       |
| 0 | P6Z821  | 40S ribosomal protein S11                                                                       |
| 0 | P43274  | Histone H1.4                                                                                    |
| 0 | Q810A3  | Tetrapeptide repeat protein 9C                                                                  |
| 0 | Q9QX47  | Protein SON                                                                                     |
| 0 | Q8R1Q6  | Transmembrane protein 176B                                                                      |
| 0 | P54227  | Stathmin                                                                                        |
| 0 | P84244  | Histone H3;Histone H3.3;Histone H3.2;Histone H3.1;Histone H3.3C                                 |
| 0 | Q9CJ65  | S-methyl-5-thiodenosine phosphorylase                                                           |
| 0 | Q08663  | Methionine aminopeptidase 2                                                                     |
| 0 | Q9N995  | 39S ribosomal protein L3, mitochondrial                                                         |
| 0 | Q9CYA0  | Cysteine-rich with EGF-like domain protein 2                                                    |
| 0 | Q9IX20  | Set1/Ash2 histone methyltransferase complex subunit ASH2                                        |
| 0 | Q8B796  | Ribonuclease P protein subunit p30                                                              |
| 0 | Q8CAQ8  | MiCOs complex subunit Mic60                                                                     |
| 0 | Q8R0W0  | Epiplakin                                                                                       |
| 0 | Q9Z1N6  | Probable ATP-dependent RNA helicase DDX27                                                       |
| 0 | Q6P921  | SWI/SNF-related matrix-associated actin-dependent regulator of chromatin subfamily D member     |
| 0 | Q8B8W1  | RNA [uracil-5-]-methyltransferase homolog A                                                     |
| 0 | P6Z843  | 40S ribosomal protein S15                                                                       |
| 0 | Q9C0G8  | NADH dehydrogenase [ubiquinone] complex 1, assembly factor 7                                    |
| 0 | Q9Z280  | Phospholipase D1                                                                                |
| 0 | P34884  | Macrophage migration inhibitory factor                                                          |
| 0 | P6Z301  | 40S ribosomal protein S13                                                                       |
| 0 | Q9WVM1  | Rac GTPase-activating protein 1                                                                 |
| 0 | Q35451  | Cyclic AMP-dependent transcription factor ATF-6 beta;Processed cyclic AMP-dependent transcript  |
| 0 | P35235  | Tyrosine-protein phosphatase non-receptor type 11                                               |
| 0 | Q6N546  | Protein RRP5 homolog                                                                            |
| 0 | Q9P678  | Zinc finger CCH domain-containing protein 18                                                    |
| 0 | Q8B8P0  | Aspartate tRNA ligase, mitochondrial                                                            |
| 0 | Q9DCT5  | Stromal cell-derived factor 2                                                                   |
| 0 | Q8BMC4  | Nuclear protein 9                                                                               |
| 0 | Q6PGC1  | ATP-dependent RNA helicase Dhx29                                                                |
| 0 | Q9N9K0  | Aconitate hydratase, mitochondrial                                                              |
| 0 | Q61334  | B-cell receptor-associated protein 29                                                           |
| 0 | Q9Z2I8  | Succinyl-CoA ligase [GDP-forming] subunit beta, mitochondrial                                   |
| 0 | P32921  | Tryptophan-tRNA ligase, cytoplasmic;T1-TrpRS;T2-TrpRS                                           |
| 0 | Q8R1G6  | PDZ and LIM domain protein 2                                                                    |
| 0 | Q9LW93  | Thioredoxin domain-containing protein 5                                                         |
| 0 | P16154  | Signal recognition particle 14 kDa protein;Signal recognition particle 14 kDa protein, N-term   |
| 0 | Q9Z1Y2  | U3 small nuclear ribonucleoprotein protein IMP3                                                 |
| 0 | Q3U308  | Cytosolic tRNA 2-thiolation protein 2                                                           |
| 0 | P83093  | Stromal interaction molecule 2                                                                  |
| 0 | P25444  | 40S ribosomal protein S2                                                                        |
| 0 | Q6X9J0  |                                                                                                 |
| 0 | P97478  | 5-demethoxyubiquinone hydroxylase, mitochondrial                                                |
| 0 | Q9D4H2  | GRIP and coiled-coil domain-containing protein 1                                                |
| 0 | P6Z500  | TSC2D1 domain family protein 1                                                                  |
| 0 | Q9C3H8  | Exosome complex exonuclease RRP44                                                               |
| 0 | Q3UMC0  | Spermatogenesis-associated protein 5                                                            |
| 0 | P61087  | Ubiquitin-conjugating enzyme E2 K                                                               |
| 0 | Q09111  | NADH dehydrogenase [ubiquinone] 1 beta subcomplex subunit 11, mitochondrial                     |
| 0 | Q9JXK1  | Syntaxin-6                                                                                      |
| 0 | Q9Z1M8  | Protein Red                                                                                     |
| 0 | P63276  | 40S ribosomal protein S17                                                                       |
| 0 | P97807  | Fumarate hydratase, mitochondrial                                                               |
| 0 | P60867  | 40S ribosomal protein S20                                                                       |
| 0 | B2KRW56 | Histone acetyltransferase p300                                                                  |
| 0 | Q9ER73  | Elongator complex protein 4                                                                     |
| 0 | Q9N0X4  | Acyl-coenzyme A thioesterase 9, mitochondrial;Acyl-coenzyme A thioesterase 10, mitochondrial    |
| 0 | Q8M070  | Polycarbonyl protein Sux12                                                                      |
| 0 | Q9Z2L6  | Multiple inositol polyphosphate phosphatase 1                                                   |
| 0 | Q80ZM5  |                                                                                                 |
| 0 | Q8BH04  | Phosphoenolpyruvate carboxykinase [GTP], mitochondrial                                          |
| 0 | Q9D8L7  | Bifunctional coenzyme A synthase;Phosphopantetheine adenyllyltransferase;Dephospho-CoA kin      |
| 0 | P42125  | Enoyl-CoA delta isomerase 1, mitochondrial                                                      |
| 0 | Q8B532  | Zinc finger RNA-binding protein                                                                 |
| 0 | Q9Z5H1  | Zinc finger transcription factor Trps1                                                          |
| 0 | P6Z858  | 40S ribosomal protein S28                                                                       |
| 0 | Q9B288  | Cell growth-regulating nuclear protein                                                          |
| 0 | Q8K2B3  | Succinate dehydrogenase [ubiquinone] flavoprotein subunit, mitochondrial                        |
| 0 | Q8CGF7  | Transcription elongation regulator 1                                                            |
| 0 | P19324  | Serpin H1                                                                                       |
| 0 | Q9D5C9  | NADH dehydrogenase [ubiquinone] 1 beta subcomplex subunit 10                                    |
| 0 | P50543  | Protein S100-A11                                                                                |
| 0 | P6Z082  | 40S ribosomal protein S7                                                                        |
| 0 | Q9D0T1  | NHP2-like protein 1;NHP2-like protein 1, N-terminally processed                                 |
| 0 | Q8R1Q8  | Cytoplasmic dynein 1 light intermediate chain 1                                                 |
| 0 | Q3U0E2  | Tubulin-tyrosine ligase-like protein 12                                                         |
| 0 | Q8R1C0  | Syntaxin-5                                                                                      |
| 0 | Q9Q0X4  | Calcium-binding mitochondrial carrier protein Aralar2                                           |
| 0 | Q8C0C8  | SLAIN motif-containing protein 2                                                                |
| 0 | Q8VDF2  | E3 ubiquitin-protein ligase UHRF1                                                               |
| 0 | Q60848  | Lymphocyte-specific helicase                                                                    |
| 0 | Q9CPV7  | Palmitoyltransferase ZDHHC5                                                                     |
| 0 | P39689  | Cyclin-dependent kinase inhibitor 1                                                             |
| 0 | P6Z754  | 40S ribosomal protein S6                                                                        |
| 0 | P59235  | Nucleoporin Nup43                                                                               |
| 0 | P33174  | Arf-GAP with coiled coil, ANK repeat and PH domain-containing protein 2                         |
| 0 | Q6G2K5  |                                                                                                 |
| 0 | Q8C0H9  | Amidophosphoribosyltransferase                                                                  |
| 0 | Q9DAR7  | m7GpppX diphosphatase                                                                           |
| 0 | Q8R3G1  | Nuclear inhibitor of protein phosphatase 1                                                      |
| 0 | Q4FZC9  | Nesprin-3                                                                                       |
| 0 | Q3THW5  | Histone H2A.V;Histone H2A.Z;Histone H2A                                                         |
| 0 | Q9Z1J2  | GTP-binding protein Rheb                                                                        |
| 0 | Q8K2T8  | RNA polymerase II-associated factor 1 homolog                                                   |
| 0 | G3XA30  |                                                                                                 |
| 0 | P50518  | V-type protein ATPase subunit E 1                                                               |

|            |            |
|------------|------------|
| Prkd3      | mmu:75292  |
| Pi4Ka      | mmu:224020 |
| RioK1      | mmu:71340  |
| Map3K4     | mmu:26407  |
| Myk        |            |
| Pip5K1c    | mmu:18717  |
| Met        |            |
| Adck5      | mmu:268822 |
| Idh2       | mmu:269951 |
| Rps29;Gm   | mmu:20090  |
| Bod1l      | mmu:665775 |
| Tsfm       | mmu:66399  |
| Erc6c      | mmu:319955 |
| Cwc15      | mmu:66070  |
| Atad3;Ata  | mmu:108888 |
| Lsm14a     | mmu:67070  |
| Ush1h      | mmu:16993  |
| Cfl1       | mmu:12631  |
| Tbca       | mmu:21371  |
| Ctsd       | mmu:13033  |
| Poldip3    | mmu:73826  |
| Scn11a;Sc  | mmu:24046  |
| Acaa2      | mmu:52538  |
| Rps26      | mmu:27370  |
| Txdnc12    | mmu:66073  |
| Capp       |            |
| Kif5b      | mmu:16580  |
| Rpl26      | mmu:19941  |
| Rps11      | mmu:27207  |
| Hist1h1e   | mmu:50709  |
| Ttc9c      | mmu:70387  |
| Son        | mmu:20658  |
| Tmem176l   | mmu:65963  |
| Stmn1      | mmu:16765  |
| H3f3a;Hist | mmu:15081  |
| Mtap       | mmu:66902  |
| Metap2     | mmu:56307  |
| Mrlp3      | mmu:94062  |
| Crelid2    | mmu:76737  |
| Ash2l      | mmu:23808  |
| Rpp30      | mmu:54364  |
| Immt       | mmu:76614  |
| Eppk1      | mmu:223650 |
| Ddx27      | mmu:228889 |
| Smardc3    | mmu:66993  |
| Tmt2a      | mmu:15547  |
| Rps15      | mmu:20054  |
| Nduaf7     | mmu:73694  |
| Pid1       |            |
| Mif        | mmu:17319  |
| Rps13      | mmu:68052  |
| Racgap1    | mmu:26934  |
| Atfb6      |            |
| Ptpn11     | mmu:19247  |
| Pcdh11     | mmu:18572  |
| Zc3h18     | mmu:76014  |
| Dars2      | mmu:226539 |
| Sdf2       | mmu:20316  |
| Nop9       | mmu:67842  |
| Chn29      | mmu:21829  |
| Aco2       | mmu:11429  |
| Rcap29     | mmu:12033  |
| Sucrl2     | mmu:20917  |
| Wars       | mmu:22375  |
| Pdlim2     | mmu:213019 |
| Txdnc5     | mmu:105245 |
| Srp14      | mmu:20813  |
| Imp3       | mmu:102462 |
| Chu2       | mmu:66965  |
| Smn2       | mmu:16998  |
| Sipa13     | mmu:16098  |
| Coq7       | mmu:12850  |
| Gcc1       | mmu:74375  |
| Tsc22d1    | mmu:12807  |
| Dia3       | mmu:72662  |
| Spta5      | mmu:57815  |
| Ube2k      | mmu:53323  |
| Ndufb11    | mmu:104130 |
| Stx6       | mmu:55484  |
| Ube2a      | mmu:24010  |
| Rpl20      | mmu:20068  |
| Ph         | mmu:14194  |
| Rps20      | mmu:67427  |
| Epp300     | mmu:328572 |
| Elp4       | mmu:77766  |
| Acot9;Aco1 | mmu:56360  |
| Suz12      | mmu:52615  |
| Minnp1     | mmu:17330  |
| H1fx       | mmu:245329 |
| Ndu60      | mmu:66925  |
| Coxy       | mmu:17743  |
| Elp1       | mmu:13177  |
| Zfr        | mmu:27663  |
| Rps28      | mmu:54127  |
| Lyar       | mmu:17089  |
| Sdha       | mmu:66945  |
| Tcerg1     | mmu:56070  |
| Serpinh1   | mmu:12406  |
| Ndu50      | mmu:22095  |
| Sin3b1     | mmu:21495  |
| Coxy       | mmu:17743  |
| Elp1       | mmu:13177  |
| Zfr        | mmu:27663  |
| Rps28      | mmu:54127  |
| Lyar       | mmu:17089  |
| Sdha       | mmu:66945  |
| Tcerg1     | mmu:56070  |
| Serpinh1   | mmu:12406  |
| Ndu50      | mmu:22095  |
| Sin3b1     | mmu:21495  |
| Coxy       | mmu:17743  |
| Elp1       | mmu:13177  |
| Zfr        | mmu:27663  |
| Rps28      | mmu:54127  |
| Lyar       | mmu:17089  |
| Sdha       | mmu:66945  |
| Tcerg1     | mmu:56070  |
| Serpinh1   | mmu:12406  |
| Ndu50      | mmu:22095  |
| Sin3b1     | mmu:21495  |
| Coxy       | mmu:17743  |
| Elp1       | mmu:13177  |
| Zfr        | mmu:27663  |
| Rps28      | mmu:54127  |
| Lyar       | mmu:17089  |
| Sdha       | mmu:66945  |
| Tcerg1     | mmu:56070  |
| Serpinh1   | mmu:12406  |
| Ndu50      | mmu:22095  |
| Sin3b1     | mmu:21495  |
| Coxy       | mmu:17743  |
| Elp1       | mmu:13177  |
| Zfr        | mmu:27663  |
| Rps28      | mmu:54127  |
| Lyar       | mmu:17089  |
| Sdha       | mmu:66945  |
| Tcerg1     | mmu:56070  |
| Serpinh1   | mmu:12406  |
| Ndu50      | mmu:22095  |
| Sin3b1     | mmu:21495  |
| Coxy       | mmu:17743  |
| Elp1       | mmu:13177  |
| Zfr        | mmu:27663  |
| Rps28      | mmu:54127  |
| Lyar       | mmu:17089  |
| Sdha       | mmu:66945  |
| Tcerg1     | mmu:56070  |
| Serpinh1   | mmu:12406  |
| Ndu50      | mmu:22095  |
| Sin3b1     | mmu:21495  |
| Coxy       | mmu:17743  |
| Elp1       | mmu:13177  |
| Zfr        | mmu:27663  |
| Rps28      | mmu:54127  |
| Lyar       | mmu:17089  |
| Sdha       | mmu:66945  |
| Tcerg1     | mmu:56070  |
| Serpinh1   | mmu:12406  |
| Ndu50      | mmu:22095  |
| Sin3b1     | mmu:21495  |
| Coxy       | mmu:17743  |
| Elp1       | mmu:13177  |
| Zfr        | mmu:27663  |
| Rps28      | mmu:54127  |
| Lyar       | mmu:17089  |
| Sdha       | mmu:66945  |
| Tcerg1     | mmu:56070  |
| Serpinh1   | mmu:12406  |
| Ndu50      | mmu:22095  |
| Sin3b1     | mmu:21495  |
| Coxy       | mmu:17743  |
| Elp1       | mmu:13177  |
| Zfr        | mmu:27663  |
| Rps28      | mmu:54127  |
| Lyar       | mmu:17089  |
| Sdha       | mmu:66945  |
| Tcerg1     | mmu:56070  |
| Serpinh1   | mmu:12406  |
| Ndu50      | mmu:22095  |
| Sin3b1     | mmu:21495  |
| Coxy       | mmu:17743  |
| Elp1       | mmu:13177  |
| Zfr        | mmu:27663  |
| Rps28      | mmu:54127  |
| Lyar       | mmu:17089  |
| Sdha       | mmu:66945  |
| Tcerg1     | mmu:56070  |
| Serpinh1   | mmu:12406  |
| Ndu50      | mmu:22095  |
| Sin3b1     | mmu:21495  |
| Coxy       | mmu:17743  |
| Elp1       | mmu:13177  |
| Zfr        | mmu:27663  |
| Rps28      | mmu:54127  |
| Lyar       | mmu:17089  |
| Sdha       | mmu:66945  |
| Tcerg1     | mmu:56070  |
| Serpinh1   | mmu:12406  |
| Ndu50      | mmu:22095  |
| Sin3b1     | mmu:21495  |
| Coxy       | mmu:17743  |
| Elp1       | mmu:13177  |
| Zfr        | mmu:27663  |
| Rps28      | mmu:54127  |
| Lyar       | mmu:17089  |
| Sdha       | mmu:66945  |
| Tcerg1     | mmu:56070  |
| Serpinh1   | mmu:12406  |
| Ndu50      | mmu:22095  |
| Sin3b1     | mmu:21495  |
| Coxy       | mmu:17743  |
| Elp1       | mmu:13177  |
| Zfr        | mmu:27663  |
| Rps28      | mmu:54127  |
| Lyar       | mmu:17089  |
| Sdha       | mmu:66945  |
| Tcerg1     | mmu:56070  |
| Serpinh1   | mmu:12406  |
| Ndu50      | mmu:22095  |
| Sin3b1     | mmu:21495  |
| Coxy       | mmu:17743  |
| Elp1       | mmu:13177  |
| Zfr        | mmu:27663  |
| Rps28      | mmu:54127  |
| Lyar       | mmu:17089  |
| Sdha       | mmu:66945  |
| Tcerg1     | mmu:56070  |
| Serpinh1   | mmu:12406  |
| Ndu50      | mmu:22095  |
| Sin3b1     | mmu:21495  |
| Coxy       | mmu:17743  |
| Elp1       | mmu:13177  |
| Zfr        | mmu:27663  |
| Rps28      | mmu:54127  |
| Lyar       | mmu:17089  |
| Sdha       | mmu:66945  |
| Tcerg1     | mmu:56070  |
| Serpinh1   | mmu:12406  |
| Ndu50      | mmu:22095  |
| Sin3b1     | mmu:21495  |
| Coxy       | mmu:17743  |
| Elp1       | mmu:13177  |
| Zfr        | mmu:27663  |
| Rps28      | mmu:54127  |
| Lyar       | mmu:17089  |
| Sdha       | mmu:66945  |
| Tcerg1     | mmu:56070  |
| Serpinh1   | mmu:12406  |
| Ndu50      | mmu:22095  |
| Sin3b1     | mmu:21495  |
| Coxy       | mmu:17743  |
| Elp1       | mmu:13177  |
| Zfr        | mmu:27663  |
| Rps28      | mmu:54127  |
| Lyar       | mmu:17089  |
| Sdha       | mmu:66945  |
| Tcerg1     | mmu:56070  |
| Serpinh1   | mmu:12406  |
| Ndu50      | mmu:22095  |
| Sin3b1     | mmu:21495  |
| Coxy       | mmu:17743  |
| Elp1       | mmu:13177  |
| Zfr        | mmu:27663  |
| Rps28      | mmu:54127  |
| Lyar       | mmu:17089  |
| Sdha       | mmu:66945  |
| Tcerg1     | mmu:56070  |
| Serpinh1   | mmu:12406  |
| Ndu50      | mmu:22095  |
| Sin3b1     | mmu:21495  |
| Coxy       | mmu:17743  |
| Elp1       | mmu:13177  |
| Zfr        | mmu:27663  |
| Rps28      | mmu:54127  |
| Lyar       | mmu:17089  |
| Sdha       | mmu:66945  |
| Tcerg1     | mmu:56070  |
| Serpinh1   | mmu:12406  |
| Ndu50      | mmu:22095  |
| Sin3b1     | mmu:21495  |
| Coxy       | mmu:17743  |
| Elp1       | mmu:13177  |
| Zfr        | mmu:27663  |
| Rps28      | mmu:54127  |
| Lyar       | mmu:17089  |
| Sdha       | mmu:66945  |
| Tcerg1     | mmu:56070  |
| Serpinh1   | mmu:12406  |
| Ndu50      | mmu:22095  |
| Sin3b1     | mmu:21495  |
| Coxy       | mmu:17743  |
| Elp1       | mmu:13177  |
| Zfr        | mmu:27663  |
| Rps28      | mmu:54127  |
| Lyar       | mmu:17089  |
| Sdha       | mmu:66945  |
| Tcerg1     | mmu:56070  |
| Serpinh1   | mmu:12406  |
| Ndu50      | mmu:22095  |
| Sin3b1     | mmu:21495  |
| Coxy       | mmu:17743  |
| Elp1       | mmu:13177  |
| Zfr        | mmu:27663  |
| Rps28      | mmu:54127  |
| Lyar       | mmu:17089  |
| Sdha       | mmu:66945  |
| Tcerg1     | mmu:56070  |
| Serpinh1   | mmu:12406  |
| Ndu50      | mmu:22095  |
| Sin3b1     | mmu:21495  |
| Coxy       | mmu:17743  |
| Elp1       | mmu:13177  |
| Zfr        | mmu:27663  |
| Rps28      | mmu:54127  |
| Lyar       | mmu:17089  |
| Sdha       | mmu:66945  |
| Tcerg1     | mmu:56070  |
| Serpinh1   | mmu:12406  |
| Ndu50      | mmu:22095  |
| Sin3b1     | mmu:21495  |
| Coxy       | mmu:17743  |
| Elp1       | mmu:13177  |
| Zfr        | mmu:27663  |
| Rps28      | mmu:54127  |
| Lyar       | mmu:17089  |
| Sdha       | mmu:66945  |
| Tcerg1     | mmu:56070  |
| Serpinh1   | mmu:12406  |
| Ndu50      | mmu:22095  |
| Sin3b1     | mmu:21495  |
| Coxy       | mmu:17743  |
| Elp1       | mmu:13177  |
| Zfr        | mmu:27663  |
| Rps28      | mmu:54127  |
| Lyar       | mmu:17089  |
| Sdha       | mmu:66945  |
| Tcerg1     | mmu:56070  |
| Serpinh1   | mmu:12406  |
| Ndu50      | mmu:22095  |
| Sin3b1     | mmu:21495  |
| Coxy       | mmu:17743  |
| Elp1       | mmu:13177  |
| Zfr        | mmu:27663  |
| Rps28      | mmu:54127  |
| Lyar       | mmu:17089  |
| Sdha       | mmu:66945  |
| Tcerg1     | mmu:56070  |
| Serpinh1   | mmu:12406  |
| Ndu50      | mmu:22095  |
| Sin3b1     | mmu:21495  |
| Coxy       | mmu:17743  |
| Elp1       | mmu:13177  |
| Zfr        | mmu:27663  |
| Rps28      | mmu:54127  |
| Lyar       | mmu:17089  |
| Sdha       | mmu:66945  |
| Tcerg1     | mmu:56070  |
| Serpinh1   | mmu:12406  |
| Ndu50      | mmu:22095  |
| Sin3b1     | mmu:21495  |
| Coxy       | mmu:17743  |
| Elp1       | mmu:13177  |
| Zfr        | mmu:27663  |
| Rps28      | mmu:54127  |
| Lyar       | mmu:17089  |
| Sdha       | mmu:66945  |
| Tcerg1     | mmu:56070  |
| Serpinh1   | mmu:12406  |
| Ndu50      | mmu:22095  |
| Sin3b1     | mmu:21495  |
| Coxy       | mmu:17743  |
| Elp1       | mmu:13177  |
| Zfr        | mmu:27663  |
| Rps28      | mmu:54127  |
| Lyar       | mmu:17089  |
| Sdha       | mmu:66945  |
| Tcerg1     | mmu:56070  |
| Serpinh1   | mmu:12406  |
| Ndu50      | mmu:22095  |
| Sin3b1     | mmu:21495  |
| Coxy       | mmu:17743  |
| Elp1       | mmu:13177  |
| Zfr        | mmu:27663  |
| Rps28      | mmu:54127  |
| Lyar       | mmu:17089  |
| Sdha       | mmu:66945  |
| Tcerg1     | mmu:56070  |
| Serpinh1   | mmu:12406  |
| Ndu50      | mmu:22095  |
| Sin3b1     | mmu:21495  |
| Coxy       | mmu:17743  |
| Elp1       | mmu:13177  |
| Zfr        | mmu:27663  |
| Rps28      | mmu:54127  |
| Lyar       | mmu:17089  |
| Sdha       | mmu:66945  |
| Tcerg1     | mmu:56070  |
| Serpinh1   | mmu:12406  |
| Ndu50      | mmu:22095  |
| Sin3b1     | mmu:21495  |
| Coxy       | mmu:17743  |
| Elp1       | mmu:13177  |
| Zfr        | mmu:27663  |
| Rps28      | mmu:54127  |
| Lyar       | mmu:17089  |
| Sdha       | mmu:66945  |
| Tcerg1     | mmu:56070  |
| Serpinh1   | mmu:12406  |
| Ndu50      | mmu:22095  |
| Sin3b1     | mmu:21495  |
| Coxy       | mmu:17743  |
| Elp1       | mmu:13177  |
| Zfr        | mmu:27663  |
| Rps28      | mmu:54127  |
| Lyar       | mmu:17089  |
| Sdha       | mmu:66945  |
| Tcerg1     | mmu:56070  |
| Serpinh1   | mmu:12406  |
| Ndu50      | mmu:22095  |
| Sin3b1     | mmu:21495  |
| Coxy       | mmu:17743  |
| Elp1       | mmu:13177  |
| Zfr        | mmu:27663  |
| Rps28      | mmu:54127  |
| Lyar       | mmu:17089  |
| Sdha       | mmu:66945  |
| Tcerg1     | mmu:56070  |
| Serpinh1   | mmu:12406  |
| Ndu50      | mmu:22095  |
| Sin3b1     | mmu:21495  |
| Coxy       | mmu:17743  |
| Elp1       | mmu:13177  |
| Zfr        | mmu:27663  |
| Rps28      | mmu:54127  |
| Lyar       | mmu:17089  |
| Sdha       | mmu:66945  |
| Tcerg1     | mmu:56070  |
| Serpinh1   | mmu:12406  |
| Ndu50      | mmu:22095  |
| Sin3b1     | mmu:21495  |
| Coxy       | mmu:17743  |
| Elp1       | mmu:13177  |
| Zfr        | mmu:27663  |
| Rps28      | mmu:54127  |
| Lyar       | mmu:17089  |
| Sdha       | mmu:66945  |
| Tcerg1     | mmu:56070  |
| Serpinh1   | mmu:12406  |
| Ndu50      | mmu:22095  |
| Sin3b1     | mmu:21495  |
| Coxy       | mmu:17743  |
| Elp1       | mmu:13177  |
| Zfr        | mmu:27663  |
| Rps28      | mmu:54127  |
| Lyar       | mmu:17089  |
| Sdha       | mmu:66945  |
| Tcerg1     | mmu:56070  |
| Serpinh1   | mmu:12406  |
| Ndu50      | mmu:22095  |
| Sin3b1     | mmu:21495  |
| Coxy       | mmu:17743  |
| Elp1       | mmu:13177  |
| Zfr        | mmu:27663  |
| Rps28      | mmu:54127  |
| Lyar       | mmu:17089  |
| Sdha       | mmu:66945  |
| Tcerg1     | mmu:56070  |
| Serpinh1   | mmu:12406  |
| Ndu50      | mmu:22095  |
| Sin3b1     | mmu:21495  |
| Coxy       | mmu:17743  |
| Elp1       | mmu:13177  |
| Zfr        | mmu:27663  |
| Rps28      | mmu:54127  |
| Lyar       | mmu:17089  |
| Sdha       | mmu:66945  |
| Tcerg1     | mmu:56070  |
| Serpinh1   | mmu:12406  |
| Ndu50      | mmu:22095  |
| Sin3b1     | mmu:21495  |
| Coxy       | mmu:17743  |
| Elp1       | mmu:13177  |
| Zfr        | mmu:27663  |
| Rps28      | mmu:54127  |
| Lyar       | mmu:17089  |
| Sdha       | mmu:66945  |
| Tcerg1     | mmu:56070  |
| Serpinh1   | mmu:12406  |
| Ndu50      | mmu:22095  |
| Sin3b1     | mmu:21495  |
| Coxy       | mmu:17743  |
| Elp1       | mmu:13177  |
| Zfr        | mmu:27663  |
| Rps28      | mmu:54127  |
| Lyar       | mmu:17089  |
| Sdha       | mmu:66945  |
| Tcerg1     | mmu:56070  |
| Serpinh1   | mmu:12406  |
| Ndu50      | mmu:22095  |
| Sin3b1     | mmu:21495  |
| Coxy       | mmu:17743  |
| Elp1       | mmu:13177  |
| Zfr        | mmu:27663  |
| Rps28      | mmu:54127  |
| Lyar       | mmu:       |

|      |         |         |         |         |
|------|---------|---------|---------|---------|
| 1250 | -1.0544 | 0.1201  | -1.6275 | -0.5683 |
| 1251 | -0.5717 | 0.2107  | 0.0587  | -0.5662 |
| 1252 | -0.4450 | 0.2437  | -0.7845 | -0.5662 |
| 1253 | -0.7367 | 0.2092  | 0.0031  | -0.5620 |
| 1254 | -1.3168 | -0.1685 | 0.0987  | -0.5615 |
| 1255 | 0.6397  | 0.0155  | -1.3211 | -0.5600 |
| 1256 | 0.2188  | -0.3568 | -0.4435 | -0.5572 |
| 1257 | -0.1260 | -0.9432 | -0.5765 | -0.5515 |
| 1258 | -0.8788 | -0.0111 | -0.3179 | -0.5502 |
| 1259 | -1.2060 | 0.2326  | -0.4156 | -0.5440 |
| 1260 | -0.2056 | 0.1813  | -0.3825 | -0.5415 |
| 1261 | 0.4661  | 0.4862  | -1.3119 | -0.5409 |
| 1262 | -0.0690 | 0.0000  | -0.9348 | -0.5392 |
| 1263 | -0.7694 | 0.6533  | -2.5888 | -0.5378 |
| 1264 | -0.1316 | -0.2763 | 0.2258  | -0.5369 |
| 1265 | 0.1847  | 0.2165  | -0.5284 | -0.5367 |
| 1266 | 0.3765  | 0.6934  | 0.0000  | -0.5349 |
| 1267 | -0.2271 | -0.3144 | -1.8535 | -0.5344 |
| 1268 | -0.5528 | -1.5963 | 0.3468  | -0.5338 |
| 1269 | 1.8189  | -0.6625 | -1.2366 | -0.5338 |
| 1270 | -3.0212 | 0.0000  | -0.8883 | -0.5330 |
| 1271 | -1.5208 | 0.8787  | -1.0117 | -0.5290 |
| 1272 | 0.6014  | 0.4635  | 0.0000  | -0.5263 |
| 1273 | 0.0930  | -0.3594 | 0.8378  | -0.5237 |
| 1274 | 0.2260  | -0.8620 | -0.4060 | -0.5234 |
| 1275 | -0.2963 | -0.5656 | 0.1654  | -0.5221 |
| 1276 | -0.7588 | -1.5689 | 0.4054  | -0.5217 |
| 1277 | -0.6683 | -0.1889 | -0.1184 | -0.5170 |
| 1278 | 0.2550  | -0.3382 | -0.0804 | -0.5130 |
| 1279 | -0.5925 | -0.2851 | 1.5889  | -0.5126 |
| 1280 | -0.4070 | 0.0000  | -0.5791 | -0.5119 |
| 1281 | -0.7052 | 0.3589  | 0.0547  | -0.5096 |
| 1282 | 0.5079  | 0.7413  | 0.0000  | -0.5066 |
| 1283 | -0.4989 | -0.0964 | 0.1168  | -0.5053 |
| 1284 | -0.0687 | -1.4160 | 1.5898  | -0.4980 |
| 1285 | -0.2615 | -0.0000 | -0.4380 | -0.4966 |
| 1286 | -1.4728 | -0.7338 | -1.5762 | -0.4933 |
| 1287 | -1.0802 | 0.6863  | 0.0000  | -0.4895 |
| 1288 | 0.9565  | -0.0795 | -0.8165 | -0.4830 |
| 1289 | 0.4728  | -1.4484 | 0.2476  | -0.4785 |
| 1290 | -1.0810 | 0.2338  | -0.6249 | -0.4785 |
| 1291 | -0.3452 | -0.3199 | 0.8867  | -0.4784 |
| 1292 | 0.9284  | -0.5268 | 0.8023  | -0.4741 |
| 1293 | -0.6682 | 0.2360  | 0.5668  | -0.4733 |
| 1294 | -1.3422 | -0.3217 | 0.0000  | -0.4676 |
| 1295 | -1.0993 | -0.0958 | -0.0049 | -0.4680 |
| 1296 | -0.1416 | -0.3948 | -1.8721 | -0.4677 |
| 1297 | -0.0000 | -0.7206 | -0.3942 | -0.4652 |
| 1298 | -0.2631 | -0.7458 | -0.7390 | -0.4648 |
| 1299 | -0.3795 | -0.3474 | 0.3592  | -0.4621 |
| 1300 | -0.6033 | 0.2830  | 1.6453  | -0.4620 |
| 1301 | -0.2772 | -0.4129 | -0.6886 | -0.4618 |
| 1302 | 0.0611  | -0.2420 | -1.0319 | -0.4604 |
| 1303 | -0.9014 | -0.0000 | 0.1578  | -0.4584 |
| 1304 | -1.7945 | -0.6958 | -0.9974 | -0.4570 |
| 1305 | -0.6688 | -0.4878 | 0.0000  | -0.4563 |
| 1306 | -0.2159 | -0.0000 | -0.1333 | -0.4552 |
| 1307 | -0.5687 | -0.1444 | 1.3704  | -0.4536 |
| 1308 | -0.3338 | -2.0162 | 0.3492  | -0.4492 |
| 1309 | -0.0723 | -0.2873 | 0.4658  | -0.4490 |
| 1310 | -0.0000 | -0.5806 | 0.3196  | -0.4450 |
| 1311 | -0.6082 | -0.0639 | 0.0838  | -0.4435 |
| 1312 | -0.4808 | 0.6361  | -0.1547 | -0.4415 |
| 1313 | 0.2703  | -0.5831 | -0.4532 | -0.4391 |
| 1314 | 0.6740  | -0.0747 | -0.4305 | -0.4390 |
| 1315 | -0.0798 | -0.6765 | -1.1964 | -0.4385 |
| 1316 | -0.9510 | -0.3038 | 0.0000  | -0.4350 |
| 1317 | -0.3940 | -1.0366 | -0.0982 | -0.4246 |
| 1318 | -0.4516 | -0.4811 | -0.7211 | -0.4243 |
| 1319 | 0.4916  | -2.5070 | -0.8426 | -0.4242 |
| 1320 | -0.0000 | -0.4603 | 0.1796  | -0.4226 |
| 1321 | -0.3092 | -0.0000 | 0.9499  | -0.4212 |
| 1322 | -0.5890 | -0.3745 | 0.5101  | -0.4198 |
| 1323 | -0.5854 | -0.0000 | -0.3676 | -0.4196 |
| 1324 | -1.0686 | -0.3923 | -2.0017 | -0.4195 |
| 1325 | -0.9281 | -0.5565 | -0.4782 | -0.4117 |
| 1326 | -1.9476 | -1.4038 | -0.3018 | -0.4115 |
| 1327 | -2.0239 | -1.0505 | -1.8163 | -0.4113 |
| 1328 | -0.2529 | -0.2559 | -1.0810 | -0.4089 |
| 1329 | -0.4812 | -0.2678 | -0.9118 | -0.4085 |
| 1330 | -0.1635 | -0.6938 | -0.2158 | -0.4036 |
| 1331 | -0.0916 | -0.0000 | -0.1474 | -0.4025 |
| 1332 | -1.2627 | -0.0813 | -0.2413 | -0.4019 |
| 1333 | -0.1023 | -0.2916 | 0.3498  | -0.4006 |
| 1334 | -0.1530 | -0.8422 | -0.5227 | -0.4003 |
| 1335 | -0.4489 | -0.6201 | -0.2782 | -0.3975 |
| 1336 | -0.5292 | -0.2248 | -0.5107 | -0.3947 |
| 1337 | -2.1743 | -0.5106 | -0.4645 | -0.3923 |
| 1338 | -0.0412 | -0.1107 | -0.6535 | -0.3920 |
| 1339 | -0.1971 | -1.2542 | -1.0596 | -0.3899 |
| 1340 | -0.0586 | -0.2945 | -0.4686 | -0.3897 |
| 1341 | -0.5177 | -0.4648 | 0.4872  | -0.3891 |
| 1342 | -0.1484 | -0.0000 | -0.3969 | -0.3885 |
| 1343 | -0.1607 | -0.6042 | -0.0828 | -0.3884 |
| 1344 | -0.0876 | -0.1447 | 0.0000  | -0.3869 |
| 1345 | -0.0719 | -1.5499 | -0.2968 | -0.3867 |
| 1346 | -0.1549 | -0.3941 | -0.5618 | -0.3861 |
| 1347 | -2.7877 | -1.3720 | 0.0000  | -0.3857 |
| 1348 | -0.5938 | -0.6574 | -0.1683 | -0.3828 |
| 1349 | -0.2237 | -0.7284 | -1.0887 | -0.3821 |
| 1350 | -0.4260 | -0.2475 | -0.1293 | -0.3811 |
| 1351 | -0.7495 | -0.1029 | 0.1677  | -0.3809 |
| 1352 | -0.9132 | -0.7872 | 0.1006  | -0.3805 |
| 1353 | -0.7608 | -0.6813 | 0.5185  | -0.3799 |
| 1354 | -0.1985 | -0.0914 | -0.9125 | -0.3781 |
| 1355 | -0.6796 | -0.1704 | -1.0586 | -0.3770 |
| 1356 | -1.0748 | -0.1188 | -0.0917 | -0.3767 |
| 1357 | -0.8927 | -0.5484 | -0.2219 | -0.3766 |
| 1358 | -0.3446 | -0.1166 | -0.6831 | -0.3757 |
| 1359 | -0.0927 | -0.1195 | -0.6485 | -0.3757 |
| 1360 | -0.9326 | -1.1448 | -0.5650 | -0.3756 |
| 1361 | -0.5536 | -0.3804 | -1.0063 | -0.3745 |
| 1362 | -0.4719 | -0.6056 | 0.0698  | -0.3741 |
| 1363 | -2.1722 | -1.0206 | -0.2610 | -0.3739 |
| 1364 | -0.6824 | -0.6208 | -0.2664 | -0.3733 |
| 1365 | -0.0000 | -0.0738 | -0.3098 | -0.3720 |
| 1366 | -0.1240 | -0.0949 | -0.4144 | -0.3697 |
| 1367 | -0.1006 | -0.2342 | -0.0609 | -0.3676 |
| 1368 | -0.8529 | -0.3855 | -0.1241 | -0.3662 |
| 1369 | -0.7127 | -0.1472 | -0.2320 | -0.3641 |
| 1370 | -0.4402 | -0.0640 | -1.3791 | -0.3639 |
| 1371 | -0.7302 | -0.0718 | 0.1858  | -0.3635 |
| 1372 | -0.1017 | -0.8074 | 0.5673  | -0.3629 |
| 1373 | -0.0737 | -0.9352 | 1.9190  | -0.3611 |
| 1374 | -1.0886 | -0.9404 | 0.4776  | -0.3606 |
| 1375 | -0.6494 | 0.4653  | -1.6994 | -0.3598 |

|   |        |                                                                                                     |
|---|--------|-----------------------------------------------------------------------------------------------------|
| 0 | Q906K8 | FUN14 domain-containing protein 2                                                                   |
| 0 | E9Q1P8 | Interferon regulatory factor 2-binding protein 2                                                    |
| 0 | Q886C4 | Zinc-binding alcohol dehydrogenase domain-containing protein 2                                      |
| 0 | Q70493 | Sorting nexin-12                                                                                    |
| 0 | Q9CQ10 | Charged multivesicular body protein 3                                                               |
| 0 | Q8VDS8 | Syntaxin-18                                                                                         |
| 0 | Q9C213 | Cytochrome b-c1 complex subunit 1, mitochondrial                                                    |
| 0 | Q505F5 | Leucine-rich repeat-containing protein 47                                                           |
| 0 | Q5SUF2 | Luc7-like protein 3                                                                                 |
| 0 | P10107 | Annexin A1                                                                                          |
| 0 | Q099L6 | GrpE protein homolog 1, mitochondrial                                                               |
| 0 | Q3TKT4 | Transcription activator BRG1                                                                        |
| 0 | Q8K2C8 | Glycerol-3-phosphate acyltransferase 4                                                              |
| 0 | Q9CR68 | Cytochrome b-c1 complex subunit Rieske, mitochondrial;Cytochrome b-c1 complex subunit 11            |
| 0 | P23506 | Protein-L-isaspartate O-methyltransferase;Protein-L-isaspartate[D-aspartate] O-methyltransferase    |
| 0 | Q99009 | Methylome protein 50                                                                                |
| 0 | P62300 | 60S ribosomal protein L31                                                                           |
| 0 | Q6ZV00 | Nesprin-2                                                                                           |
| 0 | Q6PQH8 | N-alpha-acetyltransferase 35, NatC auxiliary subunit                                                |
| 0 | Q9CXT8 | Mitochondrial-processing peptidase subunit beta                                                     |
| 0 | Q91ZU1 | Ankyrin repeat and SOCS box protein 6                                                               |
| 0 | Q88P80 | MOB kinase activator 18                                                                             |
| 0 | Q9WUR2 | Enoyl-CoA delta isomerase 2, mitochondrial                                                          |
| 0 | Q9EP97 | Sentrin-specific protease 3                                                                         |
| 0 | Q9D1Q6 | Endoplasmic reticulum resident protein 44                                                           |
| 0 | Q715C1 | Protein PRRCA2                                                                                      |
| 0 | Q18562 | Receptor-type tyrosine-protein phosphatase;Receptor-type tyrosine-protein phosphatase alpha         |
| 0 | Q60770 | Syntaxin-binding protein 3                                                                          |
| 0 | Q88U16 | Isoleucine-tRNA ligase, mitochondrial                                                               |
| 0 | P97384 | Annexin A11;Annexin                                                                                 |
| 0 | Q909Z5 | DET1- and DDB1-associated protein 1                                                                 |
| 0 | Q90DE1 | Heterogeneous nuclear ribonucleoprotein M                                                           |
| 0 | Q9CPR4 | 60S ribosomal protein L17                                                                           |
| 0 | Q9DCL9 | Multifunctional protein ADE2;Phosphoribosylaminoimidazole-succinocarboxamide synthase;Phos          |
| 0 | A28H40 | AT-rich interactive domain-containing protein 1A                                                    |
| 0 | Q9W7X6 | Cullin-1                                                                                            |
| 0 | Q9CYS2 | tRNA(His) guanylyltransferase;Probable tRNA(His) guanylyltransferase                                |
| 0 | Q62136 | Protein-tyrosine-phosphatase;Tyrosine-protein phosphatase non-receptor type 21                      |
| 0 | P11438 | Lysozyme-associated membrane glycoprotein 1                                                         |
| 0 | Q60649 | Caseinolytic peptidase 8 protein homolog                                                            |
| 0 | Q99LC5 | Electron transfer flavoprotein subunit alpha, mitochondrial                                         |
| 0 | Q6XUQ8 |                                                                                                     |
| 0 | P43275 | Histone H1.1                                                                                        |
| 0 | P46467 | Vacuolar protein sorting-associated protein 48                                                      |
| 0 | Q9QY13 | DnaJ homolog subfamily C member 7                                                                   |
| 0 | Q9Z2H1 | Protein arginine N-methyltransferase 3                                                              |
| 0 | Q99LC2 | Cleavage stimulation factor subunit 1                                                               |
| 0 | Q35129 | Prohibitin-2                                                                                        |
| 0 | Q8R2U0 | Nucleoporin SEH1                                                                                    |
| 0 | P62264 | 40S ribosomal protein S14                                                                           |
| 0 | Q9CR16 | Peptidyl-prolyl cis-trans isomerase D                                                               |
| 0 | P97493 | Thioredoxin, mitochondrial                                                                          |
| 0 | Q91ZU6 | Dystonin                                                                                            |
| 0 | Q80VD1 | Protein FAM98B                                                                                      |
| 0 | Q8K224 | N-acetyltransferase 10                                                                              |
| 0 | Q9Z2U1 | U6/U6 small nuclear ribonucleoprotein Prp3                                                          |
| 0 | Q9R0P4 | Cell cycle and apoptosis regulator protein 2                                                        |
| 0 | P97351 | 40S ribosomal protein S3a                                                                           |
| 0 | Q35516 | Neurogenic locus notch homolog protein 2;Notch 2 extracellular truncation;Notch 2 intracellular d   |
| 0 | P61514 | 60S ribosomal protein L37a                                                                          |
| 0 | P30416 | Peptidyl-prolyl cis-trans isomerase FKBP4;Peptidyl-prolyl cis-trans isomerase FKBP4, N-terminally   |
| 0 | P62702 | 40S ribosomal protein S4, X isoform                                                                 |
| 0 | Q9WV44 | Transgelin-2                                                                                        |
| 0 | Q88K72 | 28S ribosomal protein S27, mitochondrial                                                            |
| 0 | P63323 | 40S ribosomal protein S12                                                                           |
| 0 | Q9E8G0 | LM domain and actin-binding protein 1                                                               |
| 0 | Q8B024 | Eukaryotic translation initiation factor 1;Eukaryotic translation initiation factor 1b              |
| 0 | Q620B6 | Inositol hexakisphosphate and diphosphoinositol-pentakisphosphate kinase 2                          |
| 0 | P13020 | Gelsolin                                                                                            |
| 0 | Q9CZH3 | Proteasome assembly chaperone 3                                                                     |
| 0 | P23591 | GDP-L-fucose synthase                                                                               |
| 0 | Q8CEC0 | Nuclear pore complex protein Nup88                                                                  |
| 0 | Q9CQA6 | Coiled-coil-helix-coiled-coil-helix domain-containing protein 1                                     |
| 0 | Q61029 | Lamina-associated polypeptide 2, isoforms beta/delta/epsilon/gamma;Lamina-associated polypep        |
| 0 | Q9D805 | Proline-, glutamic acid- and leucine-rich protein 1                                                 |
| 0 | P54822 | Adenylsuccinate lyase                                                                               |
| 0 | Q9E867 | 15 kDa selenoprotein                                                                                |
| 0 | Q980Q3 | Transmembrane emp24 domain-containing protein 2                                                     |
| 0 | Q35387 | HCLS1-associated protein X-1                                                                        |
| 0 | Q9DCW4 | Electron transfer flavoprotein subunit beta                                                         |
| 0 | Q3UH81 | 5-nucleotidase domain-containing protein 3                                                          |
| 0 | Q60974 | Nuclear receptor corepressor 1                                                                      |
| 0 | P35283 | Ras-related protein Rab-12                                                                          |
| 0 | Q60854 | Serpin B6                                                                                           |
| 0 | P61759 | Prefoldin subunit 3                                                                                 |
| 0 | Q9CWH9 | Cyclin-T1                                                                                           |
| 0 | Q88A47 | DNA replication factor Cdt1                                                                         |
| 0 | Q8R3P6 | von Willebrand factor A domain-containing protein 9                                                 |
| 0 | A24772 | Deoxycytidine kinase                                                                                |
| 0 | Q91ZW3 | SWI/SNF-related matrix-associated actin-dependent regulator of chromatin subfamily A member         |
| 0 | Q9QXK2 | E3 ubiquitin-protein ligase RAD18                                                                   |
| 0 | Q9CQ49 | Nuclear cap-binding protein subunit 2                                                               |
| 0 | P97494 | Glutamate--cysteine ligase catalytic subunit                                                        |
| 0 | P97789 | 5-3 exoribonuclease 1                                                                               |
| 0 | Q9CQ48 | NuDC domain-containing protein 2                                                                    |
| 0 | P70303 | CTP synthase 2                                                                                      |
| 0 | Q9IKX6 | ADP-sugar pyrophosphatase                                                                           |
| 0 | P93749 | Flap endonuclease 1                                                                                 |
| 0 | Q9CQW1 | Synaptobrevin homolog YKT6                                                                          |
| 0 | Q91Z15 | UTP--glucose-1-phosphate uridylyltransferase                                                        |
| 0 | P62827 | GTP-binding nuclear protein Ran                                                                     |
| 0 | Q8R574 | Phosphoribosyl pyrophosphate synthase-associated protein 2                                          |
| 0 | Q8VE18 | Protein SMG8                                                                                        |
| 0 | Q9U182 | MAGUK p55 subfamily member 5                                                                        |
| 0 | Q80915 | AH receptor-interacting protein                                                                     |
| 0 | Q9D9R2 | Threonine-tRNA ligase, cytoplasmic                                                                  |
| 0 | P95096 | Rab GDP dissociation inhibitor alpha                                                                |
| 0 | Q8K114 | Integrator complex subunit 9                                                                        |
| 0 | F2Z4A3 |                                                                                                     |
| 0 | Q88U54 | SUN domain-containing protein 2                                                                     |
| 0 | Q9CR70 | EKC/KEOPS complex subunit Lage3                                                                     |
| 0 | Q6ZPF4 | Formin-like protein 3                                                                               |
| 0 | Q3THG9 | Alanyl-tRNA editing protein Aarsd1                                                                  |
| 0 | P97429 | Annexin A4;Annexin                                                                                  |
| 0 | A24772 |                                                                                                     |
| 0 | Q917N4 | Putative RNA-binding protein Luc7-like 2                                                            |
| 0 | Q6ZWN5 | 40S ribosomal protein S9                                                                            |
| 0 | Q99LM2 | CDK5 regulatory subunit-associated protein 3                                                        |
| 0 | P62242 | 40S ribosomal protein S8                                                                            |
| 0 | Q9D080 | Serine/arginine-rich splicing factor 9                                                              |
| 0 | Q90BG7 | Signal recognition particle receptor subunit alpha                                                  |
| 0 | P35700 | Peroxiorexin-1                                                                                      |
| 0 | P62627 | Dynein light chain roadblock-type 1                                                                 |
| 0 | Q9CS74 | Protein SG1 homolog                                                                                 |
| 0 | P17742 | Peptidyl-prolyl cis-trans isomerase A;Peptidyl-prolyl cis-trans isomerase A, N-terminally processed |
| 0 | AGH6A9 | Rab GTPase-activating protein 1-like                                                                |

|         |            |
|---------|------------|
| Fundc2  | mmu:67391  |
| Irf2bp2 | mmu:270110 |
| Zad2h   | mmu:225791 |
| Snx12   | mmu:55988  |
| Chmp3   | mmu:66700  |
| Sx18    | mmu:71116  |
| Uqcrc1  | mmu:22273  |
| Lcr07   | mmu:72946  |
| Luc7i3  | mmu:67684  |
| Anxa1   | mmu:16952  |
| Grpel1  | mmu:17713  |
| Smarca4 | mmu:20586  |
| Agpat6  | mmu:102247 |
| Uqcrcf1 | mmu:666    |

|      |         |         |         |         |
|------|---------|---------|---------|---------|
| 1376 | -0.5021 | 0.2531  | 0.2236  | -0.3559 |
| 1377 | -0.1352 | 0.9856  | 0.4611  | -0.3557 |
| 1378 | -0.0088 | -0.3588 | 0.3079  | -0.3544 |
| 1379 | -0.2168 | -0.0000 | -0.3111 | -0.3527 |
| 1380 | -0.5073 | 0.0274  | -1.9958 | -0.3514 |
| 1381 | -0.0698 | -0.6990 | 0.7942  | -0.3500 |
| 1382 | -0.0924 | -1.2538 | -0.3869 | -0.3495 |
| 1383 | -0.5487 | -0.5981 | -0.1669 | -0.3477 |
| 1384 | -0.0516 | -0.7771 | -0.8032 | -0.3451 |
| 1385 | -0.0527 | -0.6204 | 0.5447  | -0.3428 |
| 1386 | -0.0000 | 0.1069  | -0.0000 | -0.3426 |
| 1387 | -1.4183 | 1.0409  | -0.5772 | -0.3408 |
| 1388 | -0.4213 | 0.2487  | -0.0859 | -0.3408 |
| 1389 | -0.2456 | 0.7108  | -0.4838 | -0.3407 |
| 1390 | -0.7248 | -0.8880 | 0.8882  | -0.3403 |
| 1391 | -0.0985 | -0.3091 | -0.2627 | -0.3402 |
| 1392 | -0.5559 | -0.2689 | -0.3370 | -0.3399 |
| 1393 | -0.9487 | 0.1652  | -0.3744 | -0.3395 |
| 1394 | -1.1732 | 0.0734  | -0.2829 | -0.3387 |
| 1395 | -1.7536 | -0.2079 | 0.4911  | -0.3374 |
| 1396 | -0.0616 | -0.2860 | -0.4478 | -0.3364 |
| 1397 | -3.4912 | 0.0031  | -0.6054 | -0.3359 |
| 1398 | -0.1936 | 0.1589  | -1.0382 | -0.3355 |
| 1399 | -0.6639 | 0.1161  | -0.4955 | -0.3341 |
| 1400 | -1.7242 | 1.3719  | 0.5742  | -0.3312 |
| 1401 | -0.0000 | -0.4383 | 0.4652  | -0.3278 |
| 1402 | -0.4735 | -0.2434 | -0.5974 | -0.3271 |
| 1403 | -0.5370 | -0.6565 | -0.2649 | -0.3274 |
| 1404 | -0.0000 | 0.1776  | 0.5323  | -0.3271 |
| 1405 | -1.4207 | 0.0856  | 0.6434  | -0.3259 |
| 1406 | -0.2458 | -0.0000 | 0.3525  | -0.3240 |
| 1407 | -0.0000 | -0.2662 | -0.1529 | -0.3225 |
| 1408 | -0.3285 | -0.7881 | -0.5820 | -0.3219 |
| 1409 | -0.4956 | -1.6722 | -0.0608 | -0.3219 |
| 1410 | -0.0134 | -0.1264 | -0.0888 | -0.3210 |
| 1411 | -0.0000 | -0.1584 | 1.1138  | -0.3202 |
| 1412 | -1.0943 | -0.0000 | -0.4128 | -0.3173 |
| 1413 | -0.0853 | -0.3354 | -0.2631 | -0.3167 |
| 1414 | -0.1296 | 0.7535  | -3.0086 | -0.3162 |
| 1415 | -0.6158 | -0.1784 | 0.4189  | -0.3154 |
| 1416 | -0.3780 | 0.5995  | -0.0998 | -0.3131 |
| 1417 | -0.0000 | -0.0000 | -1.0759 | -0.3129 |
| 1418 | -0.2386 | -0.0000 | -1.7498 | -0.3122 |
| 1419 | -0.6735 | -1.2690 | 1.1898  | -0.3120 |
| 1420 | -0.0690 | -0.2753 | -0.4188 | -0.3093 |
| 1421 | -0.4029 | -0.0000 | -0.8281 | -0.3089 |
| 1422 | -0.0868 | -0.1609 | -0.2036 | -0.3077 |
| 1423 | -0.5375 | -0.1459 | -1.7786 | -0.3056 |
| 1424 | -0.1949 | -0.5466 | -0.1380 | -0.3055 |
| 1425 | -0.2176 | 0.2121  | -0.2464 | -0.3051 |
| 1426 | -0.2699 | 0.5639  | -0.3251 | -0.3051 |
| 1427 | -0.1941 | -0.1817 | -0.1942 | -0.3040 |
| 1428 | -0.3845 | 0.1533  | 0.5136  | -0.3038 |
| 1429 | -0.3195 | -0.5839 | 0.2168  | -0.3023 |
| 1430 | -0.3761 | -0.0000 | -1.0024 | -0.3000 |
| 1431 | -0.2899 | -0.5486 | -1.8808 | -0.2999 |
| 1432 | -0.2137 | -0.0000 | -0.1328 | -0.2978 |
| 1433 | -0.2723 | -0.6832 | -1.4402 | -0.2977 |
| 1434 | -0.0965 | -0.3591 | -0.3198 | -0.2967 |
| 1435 | -0.2040 | 0.5365  | -1.0839 | -0.2941 |
| 1436 | -0.0431 | -0.3840 | -0.2846 | -0.2927 |
| 1437 | -0.4650 | -0.4293 | -0.0606 | -0.2921 |
| 1438 | -0.2662 | 0.2638  | 0.5907  | -0.2917 |
| 1439 | -0.1904 | -0.7708 | 0.8574  | -0.2916 |
| 1440 | -1.2085 | -0.0977 | 0.1896  | -0.2908 |
| 1441 | -0.3213 | -0.1336 | -0.0000 | -0.2869 |
| 1442 | -0.6691 | -0.0000 | -0.0000 | -0.2862 |
| 1443 | -0.5944 | -0.1781 | -0.0516 | -0.2854 |
| 1444 | -0.1742 | -0.4038 | 0.0777  | -0.2829 |
| 1445 | -1.6125 | 0.4219  | -0.0000 | -0.2825 |
| 1446 | -0.2671 | 0.4454  | -0.0000 | -0.2823 |
| 1447 | -0.0000 | 0.6041  | 0.4443  | -0.2821 |
| 1448 | -0.1389 | -0.7852 | 0.3356  | -0.2806 |
| 1449 | -0.4488 | -0.3054 | -0.9325 | -0.2793 |
| 1450 | -0.1999 | 0.2114  | -0.7537 | -0.2792 |
| 1451 | -0.4652 | -1.1853 | -0.0800 | -0.2788 |
| 1452 | -0.7604 | -0.0668 | -0.5585 | -0.2788 |
| 1453 | -0.0434 | -0.1247 | -0.1531 | -0.2786 |
| 1454 | -0.2457 | 0.5447  | -1.0415 | -0.2784 |
| 1455 | -0.0849 | -0.4192 | -0.2753 | -0.2779 |
| 1456 | -0.2143 | 0.9460  | -0.1444 | -0.2774 |
| 1457 | -0.1838 | 0.3546  | -0.4017 | -0.2773 |
| 1458 | -1.3182 | -0.9528 | -1.8262 | -0.2766 |
| 1459 | -0.0000 | 0.0770  | -0.7626 | -0.2765 |
| 1460 | -1.2144 | -0.6907 | -1.2485 | -0.2745 |
| 1461 | -0.6824 | -2.5424 | -0.2733 | -0.2733 |
| 1462 | -0.4529 | -0.2067 | -0.0000 | -0.2733 |
| 1463 | -0.6752 | 0.1327  | -0.0864 | -0.2717 |
| 1464 | -2.4733 | 0.4752  | -0.1498 | -0.2717 |
| 1465 | -0.1637 | 0.0990  | -0.2128 | -0.2707 |
| 1466 | -0.2349 | -0.3003 | -0.1697 | -0.2705 |
| 1467 | -0.8215 | -0.3439 | 0.3261  | -0.2697 |
| 1468 | -0.7985 | -0.0588 | -1.7134 | -0.2680 |
| 1469 | -0.4576 | 0.7732  | -0.3578 | -0.2678 |
| 1470 | -0.4007 | 0.3151  | -0.1907 | -0.2673 |
| 1471 | -0.0866 | -0.0000 | -0.4286 | -0.2671 |
| 1472 | -0.8906 | 1.5573  | -0.5187 | -0.2669 |
| 1473 | -0.3271 | -0.3848 | -0.0506 | -0.2658 |
| 1474 | -0.5200 | -0.3615 | -0.5666 | -0.2663 |
| 1475 | -0.2815 | -1.1680 | -0.3970 | -0.2639 |
| 1476 | -0.1667 | 0.6257  | -2.4018 | -0.2636 |
| 1477 | -0.1727 | -0.2427 | -0.0000 | -0.2629 |
| 1478 | -1.0814 | 0.5649  | 0.5233  | -0.2612 |
| 1479 | -0.0931 | 0.2965  | -0.0791 | -0.2607 |
| 1480 | -0.3000 | -0.2965 | -0.2187 | -0.2597 |
| 1481 | -0.6315 | -0.0000 | -0.3584 | -0.2594 |
| 1482 | -0.1597 | 1.9420  | -0.6493 | -0.2578 |
| 1483 | -0.5290 | 0.1917  | -0.2059 | -0.2559 |
| 1484 | -0.5130 | -0.2965 | -0.2240 | -0.2553 |
| 1485 | -0.0631 | -0.1124 | -0.5703 | -0.2553 |
| 1486 | -0.8195 | 0.1148  | 0.1066  | -0.2548 |
| 1487 | -0.2913 | 0.4295  | -0.6913 | -0.2547 |
| 1488 | -0.1271 | -0.0000 | -0.8186 | -0.2544 |
| 1489 | -0.4873 | -0.3337 | -0.9611 | -0.2543 |
| 1490 | -0.2434 | 0.2164  | -0.2840 | -0.2536 |
| 1491 | -0.6315 | -0.0824 | -0.9987 | -0.2524 |
| 1492 | -1.0030 | -0.0889 | -0.2520 | -0.2520 |
| 1493 | -0.0859 | -0.6164 | -0.3579 | -0.2514 |
| 1494 | -0.5087 | -0.1453 | -0.9320 | -0.2508 |
| 1495 | -0.4438 | -0.4468 | -0.0000 | -0.2501 |
| 1496 | -0.2532 | -0.8793 | -1.0236 | -0.2500 |
| 1497 | -0.0000 | 0.4684  | 0.5966  | -0.2497 |
| 1498 | -0.4311 | 0.5555  | -0.4586 | -0.2495 |
| 1499 | -0.0000 | -0.1967 | -0.0573 | -0.2495 |
| 1500 | -0.5670 | -0.0632 | -0.3131 | -0.2487 |
| 1501 | -0.5559 | -0.1093 | -0.4322 | -0.2479 |

|   |        |                                                                                                     |
|---|--------|-----------------------------------------------------------------------------------------------------|
| 0 | Q9CP57 | RNA-binding protein PNO1                                                                            |
| 0 | O09135 | High mobility group nucleosome-binding domain-containing protein 5                                  |
| 0 | Q9DC71 | 28S ribosomal protein S15, mitochondrial                                                            |
| 0 | P62267 | 40S ribosomal protein S23                                                                           |
| 0 | Q6N0X6 | Regulation of nuclear pre-mRNA domain-containing protein 2                                          |
| 0 | Q95B77 | Cytochrome b-c1 complex subunit 2, mitochondrial                                                    |
| 0 | Q8BWA3 |                                                                                                     |
| 0 | Q8K297 | Procollagen galactosyltransferase 1                                                                 |
| 0 | Q9CZU4 | GTase Era, mitochondrial                                                                            |
| 0 | Q9DCC4 | Pyroline-5-carboxylate reductase 3                                                                  |
| 0 | P26638 | Serine-tRNA ligase, cytoplasmic                                                                     |
| 0 | Q8R151 | NFX1-type zinc finger-containing protein 1                                                          |
| 0 | P27273 | Protein disulfide-isomerase A3                                                                      |
| 0 | Q9QYJ3 | DnaI homolog subfamily B member 1                                                                   |
| 0 | Q9DBU1 | Phosphoglycerate mutase 1                                                                           |
| 0 | Q3V1V3 | ESF1 homolog                                                                                        |
| 0 | Q3U0V1 | Far upstream element-binding protein 2                                                              |
| 0 | Q92116 | SH3 domain-binding protein 4                                                                        |
| 0 | P20934 | Protein EVI2A                                                                                       |
| 0 | Q07076 | Annexin A7                                                                                          |
| 0 | Q62203 | Splicing factor 3A subunit 2                                                                        |
| 0 | Q61301 | Catenin alpha-2                                                                                     |
| 0 | E9PWG6 |                                                                                                     |
| 0 | P63280 | SUMO-conjugating enzyme UBC9                                                                        |
| 0 | Q91YF7 | RNA-binding protein 5                                                                               |
| 0 | Q9CWX6 | Structural maintenance of chromosomes protein 3                                                     |
| 0 | P58281 | Dynamin-like 120 kDa protein, mitochondrial;Dynamin-like 120 kDa protein, form S1                   |
| 0 | P39098 | Mannosyl-oligosaccharide 1,2-alpha-mannosidase IB                                                   |
| 0 | Q8R180 | ERO1-like protein alpha                                                                             |
| 0 | Q70492 | Sorting nexin-3                                                                                     |
| 0 | Q35691 | Pinin                                                                                               |
| 0 | Q8CGY8 | UOP-N-acetylglucosamine-peptide N-acetylglucosaminyltransferase 110 kDa subunit                     |
| 0 | Q9CY16 | 28S ribosomal protein S28, mitochondrial                                                            |
| 0 | Q9QYB5 | Gamma-adducin                                                                                       |
| 0 | Q6ZUW9 | 40S ribosomal protein S20                                                                           |
| 0 | Q9P696 | N-alpha-acetyltransferase 50                                                                        |
| 0 | Q61598 | Rab GDP dissociation inhibitor beta                                                                 |
| 0 | Q91VW5 | Golgin subfamily A member 4                                                                         |
| 0 | Q80YV3 | Transformation/transcription domain-associated protein                                              |
| 0 | Q92Y14 | Thyroid receptor-interacting protein 6                                                              |
| 0 | Q9D4H1 | Exocyst complex component 2                                                                         |
| 0 | P14733 | Lamin-B1                                                                                            |
| 0 | Q64012 | RNA-binding protein Raly                                                                            |
| 0 | P47941 | Crk-like protein                                                                                    |
| 0 | Q8R361 | Rab11 family-interacting protein 5                                                                  |
| 0 | Q91231 | Polypyrimidine tract-binding protein 2                                                              |
| 0 | Q9Q912 |                                                                                                     |
| 0 | Q8OC07 | Phenylalanine-tRNA ligase alpha subunit                                                             |
| 0 | P07091 | Protein S100-A4                                                                                     |
| 0 | Q8BP92 | Reticulocalbin-2                                                                                    |
| 0 | P60670 | Nuclear protein localization protein 4 homolog                                                      |
| 0 | Q99M31 | Heat shock 70 kDa protein 14                                                                        |
| 0 | Q62348 | Translin                                                                                            |
| 0 | Q99LF4 | tRNA-splicing ligase RtcB homolog                                                                   |
| 0 | Q9FPF4 | Cleavage and polyadenylation specificity factor subunit 1                                           |
| 0 | Q9P4U2 | Phenylalanine-tRNA ligase beta subunit                                                              |
| 0 | Q37KY6 | Peptidyl-prolyl cis-trans isomerase CWC27 homolog                                                   |
| 0 | Q08715 | A-kinase anchor protein 1, mitochondrial                                                            |
| 0 | Q991Y9 | Actin-related protein 3                                                                             |
| 0 | Q9C9C8 | Leucine-rich repeat-containing protein 40                                                           |
| 0 | Q8K009 | Mitochondrial 10-formyltetrahydrofolate dehydrogenase                                               |
| 0 | Q8BH60 | Golgi-associated PDZ and coiled-coil motif-containing protein                                       |
| 0 | P14131 | 40S ribosomal protein S16                                                                           |
| 0 | Q55S25 | Tensin-3                                                                                            |
| 0 | P46664 | Adenylosuccinate synthetase isozyme 2                                                               |
| 0 | Q08583 | THO complex subunit 4;Aly/REF export factor 2                                                       |
| 0 | Q8K146 | Coiled-coil and C2 domain-containing protein 1A                                                     |
| 0 | Q8RMI2 | Leucine-tRNA ligase, cytoplasmic                                                                    |
| 0 | Q77NE3 | Sperm-associated antigen 7                                                                          |
| 0 | Q8C570 | mRNA export factor                                                                                  |
| 0 | Q99162 | Replication factor C subunit 4                                                                      |
| 0 | Q8R3Y8 | Interferon regulatory factor 2-binding protein 1                                                    |
| 0 | Q8RWC0 | RNA-binding protein NOB1                                                                            |
| 0 | Q8VC05 | Mediator of RNA polymerase II transcription subunit 17                                              |
| 0 | Q3V3R1 | Monofunctional C1-tetrahydrofolate synthase, mitochondrial                                          |
| 0 | Z61624 | Zinc finger protein 148                                                                             |
| 0 | Q8R550 | SH3 domain-containing kinase-binding protein 1                                                      |
| 0 | Q9CPV5 | Polyamine-modulated factor 1                                                                        |
| 0 | Q910X0 | Transcription and mRNA export factor ENY2                                                           |
| 0 | Q91V15 | Polyglutamine-binding protein 1                                                                     |
| 0 | Q8R8K7 | Protein RCC2                                                                                        |
| 0 | Q8JZM0 | Dimethyladenosine transferase 1, mitochondrial                                                      |
| 0 | Q923K4 | tRNA modification GTPase GTPBP3, mitochondrial                                                      |
| 0 | Q8CFX3 |                                                                                                     |
| 0 | Q92216 | Negative elongation factor D                                                                        |
| 0 | Q920L1 | Fatty acid desaturase 1                                                                             |
| 0 | Q10652 | 4F2 cell-surface antigen heavy chain                                                                |
| 0 | Q9WVK4 | Eh domain-containing protein 1                                                                      |
| 0 | P53810 | Phosphatidylinositol transfer protein alpha isoform                                                 |
| 0 | Q91IH2 | Nuclear pore complex protein Nup50                                                                  |
| 0 | E9PZP8 |                                                                                                     |
| 0 | P16858 | Glyceroldehyde-3-phosphate dehydrogenase                                                            |
| 0 | A2A2R0 | Peptidyl-prolyl cis-trans isomerase G;Peptidyl-prolyl cis-trans isomerase                           |
| 0 | Q8CD10 | Calcium uptake protein 2, mitochondrial                                                             |
| 0 | Q91H13 | Something about silencing protein 10                                                                |
| 0 | Q8RGC7 | Alanine-tRNA ligase, cytoplasmic                                                                    |
| 0 | Q92157 | 38S ribosomal protein L37, mitochondrial                                                            |
| 0 | P70290 | 55 kDa erythrocyte membrane protein                                                                 |
| 0 | Q64213 | Splicing factor 1                                                                                   |
| 0 | P29758 | Ornithine aminotransferase, mitochondrial                                                           |
| 0 | Q4VA53 | Sister chromatid cohesion protein PD55 homolog B                                                    |
| 0 | P61222 | ATP-binding cassette sub-family E member 1                                                          |
| 0 | Q35309 | N-myc-interactor                                                                                    |
| 0 | Q8C132 | BAG family molecular chaperone regulator 5                                                          |
| 0 | Q8R3V6 | CUE domain-containing protein 1                                                                     |
| 0 | Q9R9D0 | Galactokinase                                                                                       |
| 0 | P70362 | Ubiquitin fusion degradation protein 1 homolog                                                      |
| 0 | Q8CSH8 | NAD kinase 2, mitochondrial                                                                         |
| 0 | Q8C3P7 | N6-adenosine-methyltransferase subunit METTL3                                                       |
| 0 | Q9ERU9 | E3 SUMO-protein ligase RanBP2                                                                       |
| 0 | P62849 | 40S ribosomal protein S24                                                                           |
| 0 | Q3THK7 | GMP synthase [glutamine-hydrolyzing]                                                                |
| 0 | Q9CZU3 | Superkiller viralicidal activity 2-like 2                                                           |
| 0 | Q61733 | 28S ribosomal protein S31, mitochondrial                                                            |
| 0 | Q6P6G5 | SWI/SNF complex subunit SMARCC2                                                                     |
| 0 | Q62520 | Wings apart-like protein homolog                                                                    |
| 0 | P43277 | Histone H1.3                                                                                        |
| 0 | P59708 | Splicing factor 3B subunit 6                                                                        |
| 0 | P21126 | Ubiquitin-like protein 4A                                                                           |
| 0 | P49312 | Heterogeneous nuclear ribonucleoprotein A1;Heterogeneous nuclear ribonucleoprotein A1, N-ter Hnmpa1 |
| 0 | Q8RHL5 | Engulfment and cell motility protein 2                                                              |
| 0 | Q8K221 | Arfaptin-2                                                                                          |
| 0 | Q9CY58 | Plasminogen activator inhibitor 1 RNA-binding protein                                               |
| 0 | Q5SU00 | Phosphoribosylformylglycinamide synthase                                                            |
| 0 | Q9CQU5 | ZW10 interactor                                                                                     |
| 0 | Q8C854 | Myelin expression factor 2                                                                          |

|         |            |
|---------|------------|
| Pno1    | mmu:66249  |
| Hmgn5   | mmu:50887  |
| Mrps15  | mmu:66407  |
| Rps23   | mmu:66475  |
| Rpsd2   | mmu:75137  |
| Uqcrc2  | mmu:67003  |
| Ubp1    | mmu:77777  |
| Colga1t | mmu:234407 |
| Eral1   | mmu:57837  |
| Pycr1   | mmu:66194  |
| Sars    | mmu:20226  |
| Znfxf1  | mmu:98999  |
| Pdia3   | mmu:14827  |
| Dnajb1  | mmu:81489  |
| Pgam1   | mmu:18648  |
| Es1f    | mmu:66580  |
| Khsrp   | mmu:16549  |
| Sh3bp4  | mmu:98402  |
| Evi2a   | mmu:14017  |
| Anxa7   | mmu:117    |



|         |                                                                                                                         |          |
|---------|-------------------------------------------------------------------------------------------------------------------------|----------|
| Q08B55  | Trifunctional enzyme subunit alpha, mitochondrial;Long-chain enoyl-CoA hydratase;Long chain 3-hydroxyacyl-CoA hydratase | At6g5v1  |
| Q08B58  | Uncharacterized protein C2orf47 homolog, mitochondrial                                                                  | Epm2ai   |
| Q09D12  | V-type proton ATPase subunit F                                                                                          | Hlp1b3   |
| Q08VE4  | EPM2A-interacting protein 1                                                                                             | Picam1   |
| Q03TEA8 | Heterochromatin protein 1-binding protein 3                                                                             | Ppp1r1b  |
| Q09M63  | Phosphatidylinositol-binding clathrin assembly protein                                                                  | Dnajb6   |
| Q62084  | Protein phosphatase 1 regulatory subunit 14B                                                                            | Gna11    |
| Q05496  | DnaI homolog subfamily B member 6                                                                                       | Smc1d1   |
| Q012178 | Guanine nucleotide-binding protein subunit alpha-11                                                                     | Arhgap5  |
| Q061191 | Host cell factor 1;HCF-N-terminal chain 1;HCF-N-terminal chain 2;HCF-N-terminal chain 3;HCF-N-terminal chain 4          | Rfc2     |
| Q09200  | Pyruvate carboxylase;Pyruvate carboxylase, mitochondrial                                                                | Gm2040   |
| Q067010 | Deoxynucleoside triphosphate triphosphohydrolase SAMHD1                                                                 | Eif3h    |
| Q098078 | Disabled homolog 2                                                                                                      | Ilfid1   |
| Q06P508 | Structural maintenance of chromosomes flexible hinge domain-containing protein 1                                        | Hsd17b1  |
| Q07393  | Rho GTPase-activating protein 5                                                                                         | Pex14    |
| Q047758 | Signal recognition particle receptor subunit beta                                                                       | Wsl1     |
| Q091WK2 | Eukaryotic translation initiation factor 3 subunit H                                                                    | Fam49h   |
| Q019182 | Interferon-related developmental regulator 1                                                                            | Cpe      |
| Q008756 | 3-hydroxyacyl-CoA dehydrogenase type-2                                                                                  | Tmem4    |
| Q09K040 | Peroxisomal membrane protein PEX14                                                                                      | Cw22c    |
| Q091VD9 | Neural Wiskott-Aldrich syndrome protein                                                                                 | Rfc2     |
| Q081Z59 | 39S ribosomal protein L48, mitochondrial                                                                                | Psmg1    |
| Q0921M7 | Protein FAM40B                                                                                                          | Lmo2     |
| Q00493  | Carboxypeptidase E                                                                                                      | Xnppep   |
| Q08K1A5 | Transmembrane protein 41B                                                                                               | Xrnn2    |
| Q085CN3 | Pre-mRNA-splicing factor CWC22 homolog                                                                                  | Dnm1t1   |
| Q09WUK4 | Replication factor C subunit 2                                                                                          | Thumpp2  |
| Q09JK23 | Proteasome assembly chaperone 1                                                                                         | Rta4     |
| Q06P181 | Xaa-Pro aminopeptidase 1                                                                                                | Pias4    |
| Q09DR81 | 5-3 exoribonuclease 2                                                                                                   | Larp4    |
| Q013864 | DNA (cytosine 5)-methyltransferase 1                                                                                    | Nubp2    |
| Q09J35  | THUMP domain-containing protein 1                                                                                       | Gfpt1    |
| Q097H3  | RNA 3'-terminal phosphatase                                                                                             | Rnf113b  |
| Q091M05 | ES SUMO-protein ligase PIAS4                                                                                            | Ildh3b   |
| Q08BW44 | La-related protein 4                                                                                                    | Fyco1    |
| Q09R061 | Cytosolic Fe-S cluster assembly factor NUBP2                                                                            | Nop58    |
| Q047856 | Glutamine-fructose-6-phosphate aminotransferase [isomerizing] 1                                                         | Uba2     |
| Q014801 |                                                                                                                         | Lmo7     |
| Q091VA7 | Isocitrate dehydrogenase [NAD] subunit, mitochondrial                                                                   | Ube2n    |
| Q08VDC1 | FYVE and coiled-coil domain-containing protein 1                                                                        | Ildh3b   |
| Q06DFV4 | Nucleolar protein 58                                                                                                    | Fyco1    |
| Q090P96 | Adenylate kinase 2, mitochondrial;Adenylate kinase 2, mitochondrial, N-terminally processed                             | Nop58    |
| Q061089 | Ubiquitin-conjugating enzyme E2 N                                                                                       | Uba2     |
| Q06FTN2 |                                                                                                                         | Lmo7     |
| Q005858 | Clathrin light chain A                                                                                                  | Ctla     |
| Q043276 | Histone H1.5                                                                                                            | Histh11  |
| Q017182 | Alpha-enolase;Enolase                                                                                                   | Eno1     |
| Q088952 | Protein lin-7 homolog C                                                                                                 | Lin7c    |
| Q09EQP2 | EH domain-containing protein 4                                                                                          | Ehd4     |
| Q008579 | Emerin                                                                                                                  | Emd      |
| Q09YPV6 |                                                                                                                         | Rasa1    |
| Q06PD20 |                                                                                                                         | Ppp2r5b  |
| Q08C151 | PDZ and LIM domain protein 5                                                                                            | Pdim5m   |
| Q030681 | High mobility group protein B2                                                                                          | Hmgb2    |
| Q03UQ28 | Peroxisidin homolog                                                                                                     | Pxdn     |
| Q09D116 | 39S ribosomal protein L14, mitochondrial                                                                                | Mrpl14   |
| Q056959 | RNA-binding protein FUS                                                                                                 | Fus      |
| Q08CEE7 | Retinol dehydrogenase 13                                                                                                | Rdh13    |
| Q09WV34 | MAGUK p55 subfamily member 2                                                                                            | Mpp2     |
| Q08BT54 | Nuclear pore complex protein Nup54                                                                                      | Nup54    |
| Q09DAW6 | UA/U6 small nuclear ribonucleoprotein Prp4                                                                              | Prpf4    |
| Q058059 | 28S ribosomal protein S21, mitochondrial                                                                                | S21mc    |
| Q0920F6 | Cell cycle checkpoint control protein RAD9A                                                                             | Rad9a    |
| Q055X13 | Fanconi anemia group J protein homolog                                                                                  | Brip1    |
| Q07Q417 | Short-chain specific acyl-CoA dehydrogenase, mitochondrial                                                              | Acads    |
| Q09WV92 | Band 4.1-like protein 3;Band 4.1-like protein 3, N-terminally processed                                                 | Epbp4l1b |
| Q05SU09 | CST complex subunit CTC1                                                                                                | Ctc1     |
| Q091VR5 | ATP-dependent RNA helicase DDX1                                                                                         | Ddx1     |
| Q06P9P6 | Kinesin-like protein KIF11                                                                                              | Kif11    |
| Q06DFV1 | Condensin-2 complex subunit G2                                                                                          | Ncapg2   |
| Q04D142 | Transketolase                                                                                                           | Tkt      |
| Q08Q447 | Protein cargo homolog 4                                                                                                 | Cgpn4    |
| Q08BY14 | Tyrosine-tRNA ligase, mitochondrial                                                                                     | Vars2    |
| Q062317 | Small nuclear ribonucleoprotein Sm D2                                                                                   | Snrpd2   |
| Q03Q265 | ATP synthase subunit alpha, mitochondrial;ATP synthase subunit alpha                                                    | Atpsa1   |
| Q03TJ26 | Protein FAM98A                                                                                                          | Fam98a   |
| Q06A026 | Sister chromatid cohesion protein PD55 homolog A                                                                        | Pds5a    |
| Q035585 | AP-1 complex subunit mu-1                                                                                               | Ap1m1    |
| Q09ERA6 | Tuftelin-interacting protein 11                                                                                         | Tfip11   |
| Q090411 | Phosphoglycerate kinase 1;Phosphoglycerate kinase                                                                       | Pgk1     |
| Q099K28 | ADP-ribosylation factor GTPase-activating protein                                                                       | Arfap2   |
| Q049481 | SWI/SNF-related matrix-associated actin-dependent regulator of chromatin subfamily E member 1                           | Smarce4  |
| Q07809  |                                                                                                                         | Morcc3   |
| Q03X981 |                                                                                                                         | Heatr1   |
| Q014069 | Protein S100-A6                                                                                                         | S100a6   |
| Q026369 | Splicing factor U2AF 65 kDa subunit                                                                                     | U2af2    |
| Q08CJ26 | Death domain-containing membrane protein NRAD0                                                                          | Nrad0    |
| Q06ZP56 | Ankyrin repeat and IBR domain-containing protein 1                                                                      | Ankib1   |
| Q09CR27 | WASH complex subunit CDC53                                                                                              | Cdc53    |
| Q09JXK7 | Nuclear RNA export factor 1                                                                                             | Nxf1     |
| Q099K85 | Phosphoserine aminotransferase                                                                                          | Psat1    |
| Q08CF79 | Cleavage stimulation factor subunit 2 tau variant                                                                       | Csf2t    |
| Q08BF85 | Elongation factor Tu, mitochondrial                                                                                     | Tufm     |
| Q097440 | Histone RNA hairpin-binding protein                                                                                     | Sldg     |
| Q09WJ78 | Programmed cell death 6-interacting protein                                                                             | Pcdip6   |
| Q06Q692 | Proteasome subunit beta-type-6                                                                                          | Psmb6    |
| Q099KV1 | DnaI homolog subfamily B member 11                                                                                      | Dnajb11b |
| Q03UFR8 | Mitochondrial ribonuclease P protein 1                                                                                  | Trmt104  |
| Q061048 | WW domain-binding protein 4                                                                                             | Wbp4     |
| Q09QC58 |                                                                                                                         | Nop1c    |
| Q09CXZ8 | 40S ribosomal protein S19                                                                                               | Rps19    |
| Q08K66  | Regulator complex protein LAMTOR4;Regulator complex protein LAMTOR4, N-terminally processed                             | Lamtor4  |
| Q015546 | Spectrin alpha chain, non-erythrocytic 1                                                                                | Spcn1    |
| Q06A133 | Amine oxidase [flavin-containing] A                                                                                     | Maoa     |
| Q08BQ30 | Phosphenin                                                                                                              | Ppp1r11  |
| Q09D287 | Pre-mRNA-splicing factor SPF27                                                                                          | Bcas2    |
| Q056812 | Programmed cell death protein 5                                                                                         | Pcdcd5   |
| Q08BS09 | Protein polybromo-1                                                                                                     | Pbrm1    |
| Q08HS59 | Calcium-binding mitochondrial carrier protein Aralar1                                                                   | Slc25a1a |
| Q08GC64 | Protein LSM14 homolog 8                                                                                                 | Lsm14b   |
| Q01HFZ0 | tRNA (cytosine(34)-C(5))-methyltransferase                                                                              | Nsun2    |
| Q02469  | Laminin subunit beta-1                                                                                                  | Lmb1     |
| Q09E528 | General transcription factor II-4                                                                                       | Gtf2f    |
| Q03UJ0  | Glycerol 3-phosphate dehydrogenase 1-like protein                                                                       | Gpd1l    |
| Q08BVF2 | Phosducin-like protein 3                                                                                                | Pdc3     |
| Q09C615 | Cyclic GMP-AMP synthase                                                                                                 | Mzb2id1  |
| Q08XCV6 | Interleukin enhancer-binding factor 2                                                                                   | Ilf2     |
| Q03UM18 | Large subunit GTPase 1 homolog                                                                                          | Lgl1     |
| Q091V89 |                                                                                                                         | Ppp2r5b  |
| Q091V09 | NADH-ubiquinone oxidoreductase 75 kDa subunit, mitochondrial                                                            | Ndufs1   |
| Q09QX51 | Plectin                                                                                                                 | Plec     |
| Q080766 | Immunity-related GTPase family M protein 1                                                                              | Irgm1    |
| Q089090 | Transcription factor Sp1                                                                                                | Sp1      |
| Q017918 | Proliferating cell nuclear antigen                                                                                      | Pcna     |
| Q09WQ03 | Protein FAM50A                                                                                                          | Fam50a   |
| Q061545 | RNA-binding protein EWS                                                                                                 | Ewsr1    |

[illegible]

1

1

1

|      |         |         |         |         |
|------|---------|---------|---------|---------|
| 1628 | -0.6699 | -0.8497 | -0.1148 | -0.1702 |
| 1629 | -0.4298 | 0.7514  | -1.3194 | -0.1701 |
| 1630 | -0.0000 | -0.7139 | 0.3339  | -0.1701 |
| 1631 | -0.1305 | 1.2333  | 0.7732  | -0.1694 |
| 1632 | -0.2414 | 0.3989  | 0.7799  | -0.1693 |
| 1633 | -0.9023 | 0.5739  | 0.4362  | -0.1679 |
| 1634 | -0.3807 | 0.4032  | 0.1133  | -0.1679 |
| 1635 | -0.5722 | -0.5088 | 0.9354  | -0.1662 |
| 1636 | -0.0000 | -0.9188 | 0.1430  | -0.1658 |
| 1637 | -0.2931 | -0.0721 | -0.2917 | -0.1651 |
| 1638 | -0.9989 | 0.4453  | -0.2862 | -0.1644 |
| 1639 | -2.3062 | 0.1036  | 1.0238  | -0.1631 |
| 1640 | -0.0000 | 0.9656  | 0.4515  | -0.1620 |
| 1641 | -0.0900 | 0.6029  | 0.1388  | -0.1617 |
| 1642 | 1.1972  | -1.2539 | 0.2680  | -0.1617 |
| 1643 | 0.2623  | 0.2155  | 0.2592  | -0.1610 |
| 1644 | -0.9810 | -0.2092 | 0.4025  | -0.1608 |
| 1645 | -0.0828 | -0.2569 | 1.0880  | -0.1605 |
| 1646 | -0.4828 | 0.1959  | -0.1026 | -0.1591 |
| 1647 | 0.3585  | 0.9534  | -0.3294 | -0.1588 |
| 1648 | -0.0000 | -1.0774 | -0.3820 | -0.1587 |
| 1649 | -0.8158 | 0.8940  | -0.6784 | -0.1586 |
| 1650 | -0.5187 | -0.2107 | -0.2873 | -0.1586 |
| 1651 | -0.0692 | 0.1588  | -0.4074 | -0.1586 |
| 1652 | -0.1039 | 0.9486  | -1.4535 | -0.1584 |
| 1653 | -0.0000 | -0.6105 | -0.6612 | -0.1580 |
| 1654 | 0.0721  | 0.5512  | 0.8688  | -0.1579 |
| 1655 | -0.0000 | -0.1825 | -0.6145 | -0.1568 |
| 1656 | -0.5044 | -0.3899 | -0.5389 | -0.1564 |
| 1657 | -0.1679 | -0.1701 | 0.3857  | -0.1559 |
| 1658 | -0.0000 | -0.0000 | -0.0929 | -0.1554 |
| 1659 | -0.3901 | 0.5041  | 0.2013  | -0.1539 |
| 1660 | -0.4483 | 0.3869  | 0.6175  | -0.1520 |
| 1661 | -0.0000 | -0.0000 | 0.4062  | -0.1519 |
| 1662 | -0.0606 | 0.3534  | 0.4532  | -0.1518 |
| 1663 | -0.6795 | 0.4772  | 0.4070  | -0.1518 |
| 1664 | -0.2574 | 0.4772  | -0.2389 | -0.1516 |
| 1665 | -0.3005 | 0.3827  | -0.1375 | -0.1511 |
| 1666 | -0.0000 | 0.5937  | -2.4988 | -0.1510 |
| 1667 | -0.0000 | 0.4018  | -0.4561 | -0.1505 |
| 1668 | 1.2456  | -0.2032 | -0.4052 | -0.1495 |
| 1669 | -0.5188 | 0.3129  | -0.3852 | -0.1494 |
| 1670 | -0.0493 | 0.1540  | -0.1586 | -0.1488 |
| 1671 | -0.0957 | 0.2170  | 0.5066  | -0.1480 |
| 1672 | -0.1536 | 0.2488  | -0.1596 | -0.1475 |
| 1673 | -0.2245 | -0.2336 | -0.0708 | -0.1474 |
| 1674 | -0.3219 | -1.4848 | -1.4555 | -0.1471 |
| 1675 | -0.4277 | 0.2418  | 0.4705  | -0.1469 |
| 1676 | -1.4461 | 0.3597  | 0.2087  | -0.1465 |
| 1677 | -0.1737 | 0.1485  | -0.2661 | -0.1462 |
| 1678 | -0.5113 | 0.1583  | -0.4140 | -0.1461 |
| 1679 | -0.2010 | -0.7592 | -0.6035 | -0.1460 |
| 1680 | -0.2420 | -0.5229 | -0.1458 | -0.1458 |
| 1681 | -0.1785 | 0.0629  | -0.4339 | -0.1458 |
| 1682 | -0.4705 | -0.2691 | -1.0425 | -0.1446 |
| 1683 | -0.0000 | 0.6914  | -0.7613 | -0.1442 |
| 1684 | -0.3528 | -0.9403 | -0.1345 | -0.1441 |
| 1685 | -0.2280 | -0.2405 | -0.5788 | -0.1421 |
| 1686 | -0.0000 | -0.8975 | -1.2426 | -0.1419 |
| 1687 | -0.6856 | 0.2825  | -0.1417 | -0.1417 |
| 1688 | -0.5286 | -2.2344 | 1.0691  | -0.1416 |
| 1689 | -0.0638 | 0.1828  | -0.2610 | -0.1409 |
| 1690 | -1.6134 | 0.2353  | -0.1816 | -0.1405 |
| 1691 | -0.4528 | -0.3490 | -0.3207 | -0.1405 |
| 1692 | -0.0797 | -0.2862 | -0.1400 | -0.1400 |
| 1693 | -0.0165 | -0.1095 | -0.1396 | -0.1396 |
| 1694 | -0.0628 | -0.3848 | -0.7623 | -0.1394 |
| 1695 | -0.6430 | -0.3905 | -0.2623 | -0.1393 |
| 1696 | -0.2120 | 0.2436  | 0.1669  | -0.1391 |
| 1697 | -0.1588 | 0.4661  | 0.1310  | -0.1391 |
| 1698 | -0.5945 | 0.0913  | -0.5152 | -0.1383 |
| 1699 | -0.2862 | -0.5076 | 0.1405  | -0.1379 |
| 1700 | -0.5380 | -0.0597 | -1.0705 | -0.1373 |
| 1701 | -0.3510 | -0.4144 | 0.2089  | -0.1372 |
| 1702 | -0.3552 | -0.2011 | 0.2120  | -0.1352 |
| 1703 | -1.0800 | -0.9282 | -0.3354 | -0.1351 |
| 1704 | -0.2055 | -1.0295 | -0.3698 | -0.1349 |
| 1705 | -0.5843 | -0.3484 | -0.7572 | -0.1344 |
| 1706 | -0.7407 | -0.2283 | -0.0810 | -0.1342 |
| 1707 | -0.7350 | 0.6658  | -0.2661 | -0.1337 |
| 1708 | -0.0000 | -0.4906 | 0.2375  | -0.1337 |
| 1709 | -0.5987 | 0.5539  | 0.0319  | -0.1330 |
| 1710 | -0.4364 | -0.5966 | 0.1397  | -0.1329 |
| 1711 | -1.2485 | -0.0000 | 1.0628  | -0.1321 |
| 1712 | -0.2630 | -0.0698 | -0.7782 | -0.1313 |
| 1713 | -0.4114 | 0.2436  | -0.1738 | -0.1312 |
| 1714 | -0.0485 | 0.5851  | -0.1665 | -0.1309 |
| 1715 | -0.5412 | -0.2498 | -0.2706 | -0.1302 |
| 1716 | -0.0753 | 0.3042  | -0.7079 | -0.1301 |
| 1717 | -0.1905 | -0.2250 | -0.1353 | -0.1300 |
| 1718 | -0.1199 | -0.2396 | 0.6523  | -0.1297 |
| 1719 | -0.1575 | 0.3055  | 0.6215  | -0.1296 |
| 1720 | -0.3715 | 0.6294  | 0.4411  | -0.1292 |
| 1721 | -0.2716 | 0.8081  | -0.8856 | -0.1291 |
| 1722 | -0.2187 | -0.1977 | -0.1352 | -0.1287 |
| 1723 | -0.0000 | -0.1521 | -1.3952 | -0.1286 |
| 1724 | -0.0917 | 0.4018  | -0.1283 | -0.1283 |
| 1725 | -0.5516 | 0.1658  | 0.4391  | -0.1282 |
| 1726 | -0.8821 | -0.0271 | -0.2822 | -0.1282 |
| 1727 | -0.6048 | 0.5580  | -0.1277 | -0.1277 |
| 1728 | -0.0451 | 0.7258  | -0.5408 | -0.1271 |
| 1729 | -0.0730 | 0.4390  | -0.1639 | -0.1270 |
| 1730 | -0.2450 | -0.0931 | -0.2293 | -0.1242 |
| 1731 | -0.2182 | -0.0000 | 0.0727  | -0.1232 |
| 1732 | -0.2009 | 0.4054  | -0.6525 | -0.1229 |
| 1733 | -0.1225 | -0.3150 | -0.6746 | -0.1221 |
| 1734 | -0.2215 | -0.0688 | -0.6946 | -0.1219 |
| 1735 | -0.0649 | -1.0563 | 0.2744  | -0.1210 |
| 1736 | -0.5864 | 0.2740  | -0.7332 | -0.1205 |
| 1737 | -0.6293 | -0.0773 | -0.3690 | -0.1205 |
| 1738 | -0.1834 | -0.2834 | 0.3059  | -0.1194 |
| 1739 | -0.1822 | -0.3425 | 0.4118  | -0.1187 |
| 1740 | -0.4125 | -0.2423 | -0.1930 | -0.1187 |
| 1741 | -0.0000 | -0.3009 | 0.1540  | -0.1177 |
| 1742 | -0.0815 | -0.4121 | -0.0734 | -0.1175 |
| 1743 | -0.0000 | -0.1485 | -0.1785 | -0.1170 |
| 1744 | -0.0000 | -0.3413 | -0.1165 | -0.1165 |
| 1745 | -0.7192 | -0.2984 | -0.2290 | -0.1164 |
| 1746 | -0.0000 | -0.1047 | -0.7349 | -0.1163 |
| 1747 | -0.7901 | 1.1488  | 0.3267  | -0.1162 |
| 1748 | -1.9909 | 0.4636  | -0.4531 | -0.1160 |
| 1749 | -0.1880 | 0.1756  | -0.1159 | -0.1159 |
| 1750 | -0.1888 | -0.4781 | 0.2985  | -0.1157 |
| 1751 | -0.3407 | -0.5093 | -0.3802 | -0.1151 |
| 1752 | -0.3406 | -0.3175 | -0.4754 | -0.1145 |
| 1753 | -0.8483 | -0.2481 | 0.8429  | -0.1144 |

|   |            |                                                                                                 |
|---|------------|-------------------------------------------------------------------------------------------------|
| 0 | Q924T2     | 28S ribosomal protein S2, mitochondrial                                                         |
| 0 | Q8R2K4     | TAF6-like RNA polymerase II p300/CBP-associated factor-associated factor 65 kDa subunit 6L      |
| 0 | A0A0I9YTR2 |                                                                                                 |
| 0 | Q9JIK4     | Protein AATF                                                                                    |
| 0 | P25041     | Moesin                                                                                          |
| 0 | Q6PDM2     | Serine/arginine-rich splicing factor 1                                                          |
| 0 | Q9Z1X4     | Interleukin enhancer-binding factor 3                                                           |
| 0 | Q9N1G2     | Transportin-2                                                                                   |
| 0 | Q9CZW5     | Mitochondrial import receptor subunit TOM70                                                     |
| 0 | Q8BGC0     | HIV Tat-specific factor 1 homolog                                                               |
| 0 | Q2HXK6     | alpha-1,2-Mannosidase;ER degradation-enhancing alpha-mannosidase-like protein 3                 |
| 0 | Q6PIP5     | NudC domain-containing protein 1                                                                |
| 0 | P70388     | DNA repair protein RAD50                                                                        |
| 0 | Q8CHY6     | Transcriptional repressor p66 alpha                                                             |
| 0 | Q8R356     | Exocyst complex component 1                                                                     |
| 0 | Q9QC61     | Mitochondrial-processing peptidase subunit alpha                                                |
| 0 | Q8R086     | RNA-binding protein 3                                                                           |
| 0 | P70441     | Na(+)/H(+) exchange regulatory cofactor NHE-RF1                                                 |
| 0 | Q99NH0     | Ankyrin repeat domain-containing protein 17                                                     |
| 0 | Q810D6     | Glutamate-rich WD repeat-containing protein 1                                                   |
| 0 | Q9CRD0     | OCA1 domain-containing protein 1                                                                |
| 0 | Q61937     | Nucleophosmin                                                                                   |
| 0 | Q3UUV0     | [Pyruvate dehydrogenase [acetyl-transferring]]-phosphatase 1, mitochondrial                     |
| 0 | Q8BRF7     | Sec1 family domain-containing protein 1                                                         |
| 0 | Q8K2C7     | Protein OS-9                                                                                    |
| 0 | G5E8K5     | Ankyrin-3                                                                                       |
| 0 | Q9CQC3     | Glia maturation factor beta                                                                     |
| 0 | Q8K298     | Actin-binding protein anillin                                                                   |
| 0 | Q70305     | Ataxin-2                                                                                        |
| 0 | Q8B8X8     | HSPB1-associated protein 1                                                                      |
| 0 | Q35887     | Calumenin                                                                                       |
| 0 | Q9CU62     | Structural maintenance of chromosomes protein 1A                                                |
| 0 | Q8C2Q3     | RNA-binding protein 14                                                                          |
| 0 | Q02053     | Ubiquitin-like modifier-activating enzyme 1                                                     |
| 0 | Q9Z1K5     | E3 ubiquitin-protein ligase ARIH1                                                               |
| 0 | Q9C2V8     | F-box/UBR-repeat protein 20                                                                     |
| 0 | Q9D8V8     | Nuclear valosin-containing protein-like                                                         |
| 0 | Q9DC51     | Guanine nucleotide-binding protein G(k) subunit alpha                                           |
| 0 | Q77NV0     | Protein DEK                                                                                     |
| 0 | Q61033     | Lamina-associated polypeptide 2, isoforms alpha/zeta                                            |
| 0 | Q91VM5     | RNA binding motif protein, X-linked-like-1                                                      |
| 0 | A2ADY9     | Protein DD11 homolog 2                                                                          |
| 0 | Q8CG86     | Tensin-2                                                                                        |
| 0 | Q3U213     | FTS and Hook-interacting protein                                                                |
| 0 | Q9ERK0     | Secretory carrier-associated membrane protein 2                                                 |
| 0 | Talin-1    | Talin-1                                                                                         |
| 0 | Q62241     | U1 small nuclear ribonucleoprotein C                                                            |
| 0 | Q61656     | Probable ATP-dependent RNA helicase DDX5                                                        |
| 0 | Q8C0E5     | Fermitin family homolog 2                                                                       |
| 0 | Q9Z1Z2     | Serine-threonine kinase receptor-associated protein                                             |
| 0 | Q9CY14     | Putative RNA-binding protein Luc7-like 1                                                        |
| 0 | Q55RX1     | TOM1-like protein 2                                                                             |
| 0 | Q3T1L4     | Protein PRR2C                                                                                   |
| 0 | Q6ZQ08     | CCR4-NOT transcription complex subunit 1                                                        |
| 0 | Q54774     | AP-3 complex subunit delta-1                                                                    |
| 0 | P51381     | ADP/ATP translocase 2;ADP/ATP translocase 2, N-terminally processed                             |
| 0 | P09M17     | 5-adenosylmethionine decarboxylase proenzyme 1,5-adenosylmethionine decarboxylase 1 alpha       |
| 0 | P47802     | Metaxin-1                                                                                       |
| 0 | E9QGU4     | Prefoldin subunit 4                                                                             |
| 0 | Q8C989     | Death-inducer obliterator 1                                                                     |
| 0 | Q69Z02     | Pre-mRNA-splicing factor ISY1 homolog                                                           |
| 0 | Q14C51     | Pentatricopeptide repeat domain-containing protein 3, mitochondrial                             |
| 0 | H1010      | Histone H1.0;Histone H1.0, N-terminally processed                                               |
| 0 | Q3TUV4     |                                                                                                 |
| 0 | Q08795     | Glucosidase 2 subunit beta                                                                      |
| 0 | Q3U3C8     |                                                                                                 |
| 0 | Q8R071     | Transmembrane protein 106B                                                                      |
| 0 | Q9CQC9     | GTP-binding protein SAR1b                                                                       |
| 0 | P30999     | Catenin delta-1                                                                                 |
| 0 | Q501J6     | Probable ATP-dependent RNA helicase DDX17                                                       |
| 0 | Q91VY9     | Zinc finger protein 622                                                                         |
| 0 | Q8BYY4     | Tetratricopeptide repeat protein 39B                                                            |
| 0 | Q6PG16     | Holliday junction recognition protein                                                           |
| 0 | Q9Z305     | WW domain-binding protein 11                                                                    |
| 0 | Q9D013     | SAP domain-containing ribonucleoprotein                                                         |
| 0 | Q55236     | mRNA-capping enzyme;Polynucleotide 5-triphosphatase;mRNA guanylyltransferase                    |
| 0 | Q8R6GW1    | Alpha-ketoglutarate-dependent dioxygenase FTO                                                   |
| 0 | Q9CQC7     | ATP synthase F(0) complex subunit B1, mitochondrial                                             |
| 0 | P09405     | Nucleolin                                                                                       |
| 0 | Q6KAR6     | Exocyst complex component 3                                                                     |
| 0 | Q9JMA1     | Ubiquitin carboxyl-terminal hydrolase 14;Ubiquitin carboxyl-terminal hydrolase                  |
| 0 | Q9Z1J4     | Ubiquitin-conjugating enzyme E2 5                                                               |
| 0 | Q9QY59     | Protein quaking                                                                                 |
| 0 | Q8VHK9     | ATP-dependent RNA helicase DHX36                                                                |
| 0 | Q99K51     | Plastin-3                                                                                       |
| 0 | Q914D5     | Vacuolar protein-sorting-associated protein 36                                                  |
| 0 | Q9D0J8     | 28S ribosomal protein S33, mitochondrial                                                        |
| 0 | P07141     | Macrophage colony-stimulating factor 1;Processed macrophage colony-stimulating factor 1         |
| 0 | Q6A068     | Cell division cycle 5-like protein                                                              |
| 0 | Q9D5V5     | Cullin-5                                                                                        |
| 0 | Q6A028     | Switch-associated protein 70                                                                    |
| 0 | Q8R323     | Replication factor C subunit 3                                                                  |
| 0 | P61967     | AP-1 complex subunit sigma-1A                                                                   |
| 0 | Q8R3N6     | THO complex subunit 1                                                                           |
| 0 | Q6PDT2     | 2-aminoethanethiol dioxygenase                                                                  |
| 0 | Q35218     | Cleavage and polyadenylation specificity factor subunit 2                                       |
| 0 | Q37B82     | Pleckstrin homology domain-containing family F member 1                                         |
| 0 | Q8R707     | Centrosomal protein of 55 kDa                                                                   |
| 0 | Q9WU56     | tRNA pseudouridine synthase A, mitochondrial;tRNA pseudouridine synthase                        |
| 0 | Q8R0W5     | Nuclear protein 11                                                                              |
| 0 | Q60930     | Voltage-dependent anion-selective channel protein 2                                             |
| 0 | Q91VC3     | Eukaryotic initiation factor 4A-III;Eukaryotic initiation factor 4A-III, N-terminally processed |
| 0 | Q8R0X6     | Protein Smaug homolog 2                                                                         |
| 0 | Q3Y2P9     | Coiled-coil domain-containing protein 6                                                         |
| 0 | Q62376     | U1 small nuclear ribonucleoprotein 70 kDa                                                       |
| 0 | Q71DQ0     | Ataxin-2-like protein                                                                           |
| 0 | Q9Z2T5     | Serine/threonine-protein phosphatase 4 regulatory subunit 3B                                    |
| 0 | Q8R0J7     | Rab3 GTPase-activating protein catalytic subunit                                                |
| 0 | Q9J190     | E3 ubiquitin-protein ligase RNF14                                                               |
| 0 | P09103     | Protein disulfide-isomerase                                                                     |
| 0 | Q99KQ4     | Nicotinamide phosphoribosyltransferase                                                          |
| 0 | Q8R0J9     | Nuclear pore complex protein Nup214                                                             |
| 0 | A2AKG8     | Fodacsin                                                                                        |
| 0 | P48193     | Protein 4,1                                                                                     |
| 0 | Q8RV93     | Exosome complex component RRP4                                                                  |
| 0 | Q8RML9     |                                                                                                 |
| 0 | Q8R0G9     | Nuclear pore complex protein Nup133                                                             |
| 0 | Q61140     | Breast cancer anti-estrogen resistance protein 1                                                |
| 0 | Q9Q0A3     |                                                                                                 |
| 0 | Q9DC78     | Cysteine-rich protein 2                                                                         |
| 0 | P53702     | Cytochrome c-type heme lyase                                                                    |
| 0 | Q9D0M1     | Phosphoribosyl pyrophosphate synthase-associated protein 1                                      |
| 0 | Q9D0I9     | Arginine-tRNA ligase, cytoplasmic                                                               |
| 0 | Q08R82     | GTP-binding protein 1                                                                           |
| 0 | P08752     | Guanine nucleotide-binding protein G(i) subunit alpha-2                                         |
| 0 | P60335     | Poly(rC)-binding protein 1                                                                      |

|  |  |  |  |  |  |  |  |  |  |  |  |  |  |  |  |  |  |  |  |  |  |  |  |  |  |  |  |  |  |  |  |  |  |  |  |  |  |  |  |  |  |  |  |  |  |  |  |  |  |  |  |  |  |  |  |  |  |  |  |  |  |  |  |  |  |  |  |  |  |  |  |  |  |  |  |  |  |  |  |  |  |  |  |  |  |  |  |  |  |  |  |  |  |  |  |  |  |  |  |  |  |  |  |  |  |  |  |  |  |  |  |  |  |  |  |  |  |  |  |  |  |  |  |  |  |  |  |  |  |  |  |  |  |  |  |  |  |  |  |  |  |  |  |  |  |  |  |  |  |  |  |  |  |  |  |  |  |  |  |  |  |  |  |  |  |  |  |  |  |  |  |  |  |  |  |  |  |  |  |  |  |  |  |  |  |  |  |  |  |  |  |  |  |  |  |  |  |  |  |  |  |  |  |  |  |  |  |  |  |  |  |  |  |  |  |  |  |  |  |  |  |  |  |  |  |  |  |  |  |  |  |  |  |  |  |  |  |  |  |  |  |  |  |  |  |  |  |  |  |  |  |  |  |  |  |  |  |  |  |  |  |  |  |  |  |  |  |  |  |  |  |  |  |  |  |  |  |  |  |  |  |  |  |  |  |  |  |  |  |  |  |  |  |  |  |  |  |  |  |  |  |  |  |  |  |  |  |  |  |  |  |  |  |  |  |  |  |  |  |  |  |  |  |  |  |  |  |  |  |  |  |  |  |  |  |  |  |  |  |  |  |  |  |  |  |  |  |  |  |  |  |  |  |  |  |  |  |  |  |  |  |  |  |  |  |  |  |  |  |  |  |  |  |  |  |  |  |  |  |  |  |  |  |  |  |  |  |  |  |  |  |  |  |  |  |  |  |  |  |  |  |  |  |  |  |  |  |  |  |  |  |  |  |  |  |  |  |  |  |  |  |  |  |  |  |  |  |  |  |  |  |  |  |  |  |  |  |  |  |  |  |  |  |  |  |  |  |  |  |  |  |  |  |  |  |  |  |  |  |  |  |  |  |  |  |  |  |  |  |  |  |  |  |  |  |  |  |  |  |  |  |  |  |  |  |  |  |  |  |  |  |  |  |  |  |  |  |  |  |  |  |  |  |  |  |  |  |  |  |  |  |  |  |  |  |  |  |  |  |  |  |  |  |  |  |  |  |  |  |  |  |  |  |  |  |  |  |  |  |  |  |  |  |  |  |  |  |  |  |  |  |  |  |  |  |  |  |  |  |  |  |  |  |  |  |  |  |  |  |  |  |  |  |  |  |  |  |  |  |  |  |  |  |  |  |  |  |  |  |  |  |  |  |  |  |  |  |  |  |  |  |  |  |  |  |  |  |  |  |  |  |  |  |  |  |  |  |  |  |  |  |  |  |  |  |  |  |  |  |  |  |  |  |  |  |  |  |  |  |  |  |  |  |  |  |  |  |  |  |  |  |  |  |  |  |  |  |  |  |  |  |  |  |  |  |  |  |  |  |  |  |  |  |  |  |  |  |  |  |  |  |  |  |  |  |  |  |  |  |  |  |  |  |  |  |  |  |  |  |  |  |  |  |  |  |  |  |  |  |  |  |  |  |  |  |  |  |  |  |  |  |  |  |  |  |  |  |  |  |  |  |  |  |  |  |  |  |  |  |  |  |  |  |  |  |  |  |  |  |  |  |  |  |  |  |  |  |  |  |  |  |  |  |  |  |  |  |  |  |  |  |  |  |  |  |  |  |  |  |  |  |  |  |  |  |  |  |  |  |  |  |  |  |  |  |  |  |  |  |  |  |  |  |  |  |  |  |  |  |  |  |  |  |  |  |  |  |  |  |  |  |  |  |  |  |  |  |  |  |  |  |  |  |  |  |  |  |  |  |  |  |  |  |  |  |  |  |  |  |  |  |  |  |  |  |  |  |  |  |  |  |  |  |  |  |  |  |  |  |  |  |  |  |  |  |  |  |  |  |  |  |  |  |  |  |  |  |  |  |  |  |  |  |  |  |  |  |  |  |  |  |  |  |  |  |  |  |  |  |  |  |  |  |  |  |  |  |  |  |  |  |  |  |  |  |  |  |  |  |  |  |  |  |  |  |  |  |  |  |  |  |  |  |  |  |  |  |  |  |  |  |  |  |  |  |  |  |  |  |  |  |  |  |  |  |  |  |  |  |  |  |  |  |  |  |  |  |  |  |  |  |  |  |  |  |  |  |  |  |  |  |  |  |  |  |  |  |  |  |  |  |  |  |  |  |  |  |  |  |  |  |  |  |  |  |  |  |  |  |  |  |  |  |  |  |  |  |  |  |  |  |  |  |  |  |  |  |  |  |  |  |  |  |  |  |  |  |  |  |  |  |  |  |  |  |  |  |  |  |  |  |  |  |  |  |  |  |  |  |  |  |  |  |  |  |  |  |  |  |  |  |  |  |  |  |  |  |  |  |  |  |  |  |  |  |  |  |  |  |  |  |  |  |  |  |  |  |  |  |  |  |  |  |  |  |  |  |  |  |  |  |  |  |  |  |  |  |  |  |  |  |  |  |  |  |  |  |  |  |  |  |  |  |  |  |  |  |  |  |  |  |  |  |  |  |  |  |  |  |  |  |  |  |  |  |  |  |  |  |  |  |  |  |  |  |  |  |  |  |  |  |  |  |  |  |  |  |  |  |  |  |  |  |  |  |  |  |  |  |  |  |  |  |  |  |  |  |  |  |  |  |  |  |  |  |  |  |  |  |  |  |  |  |  |  |  |  |  |  |  |  |  |  |  |  |  |  |  |  |  |  |  |  |  |  |  |  |  |  |  |  |  |  |  |  |  |  |  |  |  |  |  |  |  |  |  |  |  |  |  |  |  |  |  |  |  |  |  |  |  |  |  |  |  |  |  |  |  |  |  |  |  |  |  |  |  |  |  |  |  |  |  |  |  |  |  |  |  |  |  |  |  |  |  |  |  |  |  |  |  |  |  |  |  |  |  |  |  |  |  |  |  |  |  |  |  |  |  |  |  |  |  |  |  |  |  |  |  |  |  |  |  |  |  |  |  |  |  |  |  |  |  |  |  |  |  |  |  |  |  |  |  |  |  |  |  |  |  |  |  |  |  |  |  |  |  |  |  |  |  |  |  |  |  |  |  |  |  |  |  |  |  |  |  |  |  |  |  |  |  |  |  |  |  |  |  |  |  |  |  |  |  |  |  |  |  |  |  |  |  |  |  |  |  |  |  |  |  |  |  |  |  |  |  |  |  |  |  |  |  |  |
|--|--|--|--|--|--|--|--|--|--|--|--|--|--|--|--|--|--|--|--|--|--|--|--|--|--|--|--|--|--|--|--|--|--|--|--|--|--|--|--|--|--|--|--|--|--|--|--|--|--|--|--|--|--|--|--|--|--|--|--|--|--|--|--|--|--|--|--|--|--|--|--|--|--|--|--|--|--|--|--|--|--|--|--|--|--|--|--|--|--|--|--|--|--|--|--|--|--|--|--|--|--|--|--|--|--|--|--|--|--|--|--|--|--|--|--|--|--|--|--|--|--|--|--|--|--|--|--|--|--|--|--|--|--|--|--|--|--|--|--|--|--|--|--|--|--|--|--|--|--|--|--|--|--|--|--|--|--|--|--|--|--|--|--|--|--|--|--|--|--|--|--|--|--|--|--|--|--|--|--|--|--|--|--|--|--|--|--|--|--|--|--|--|--|--|--|--|--|--|--|--|--|--|--|--|--|--|--|--|--|--|--|--|--|--|--|--|--|--|--|--|--|--|--|--|--|--|--|--|--|--|--|--|--|--|--|--|--|--|--|--|--|--|--|--|--|--|--|--|--|--|--|--|--|--|--|--|--|--|--|--|--|--|--|--|--|--|--|--|--|--|--|--|--|--|--|--|--|--|--|--|--|--|--|--|--|--|--|--|--|--|--|--|--|--|--|--|--|--|--|--|--|--|--|--|--|--|--|--|--|--|--|--|--|--|--|--|--|--|--|--|--|--|--|--|--|--|--|--|--|--|--|--|--|--|--|--|--|--|--|--|--|--|--|--|--|--|--|--|--|--|--|--|--|--|--|--|--|--|--|--|--|--|--|--|--|--|--|--|--|--|--|--|--|--|--|--|--|--|--|--|--|--|--|--|--|--|--|--|--|--|--|--|--|--|--|--|--|--|--|--|--|--|--|--|--|--|--|--|--|--|--|--|--|--|--|--|--|--|--|--|--|--|--|--|--|--|--|--|--|--|--|--|--|--|--|--|--|--|--|--|--|--|--|--|--|--|--|--|--|--|--|--|--|--|--|--|--|--|--|--|--|--|--|--|--|--|--|--|--|--|--|--|--|--|--|--|--|--|--|--|--|--|--|--|--|--|--|--|--|--|--|--|--|--|--|--|--|--|--|--|--|--|--|--|--|--|--|--|--|--|--|--|--|--|--|--|--|--|--|--|--|--|--|--|--|--|--|--|--|--|--|--|--|--|--|--|--|--|--|--|--|--|--|--|--|--|--|--|--|--|--|--|--|--|--|--|--|--|--|--|--|--|--|--|--|--|--|--|--|--|--|--|--|--|--|--|--|--|--|--|--|--|--|--|--|--|--|--|--|--|--|--|--|--|--|--|--|--|--|--|--|--|--|--|--|--|--|--|--|--|--|--|--|--|--|--|--|--|--|--|--|--|--|--|--|--|--|--|--|--|--|--|--|--|--|--|--|--|--|--|--|--|--|--|--|--|--|--|--|--|--|--|--|--|--|--|--|--|--|--|--|--|--|--|--|--|--|--|--|--|--|--|--|--|--|--|--|--|--|--|--|--|--|--|--|--|--|--|--|--|--|--|--|--|--|--|--|--|--|--|--|--|--|--|--|--|--|--|--|--|--|--|--|--|--|--|--|--|--|--|--|--|--|--|--|--|--|--|--|--|--|--|--|--|--|--|--|--|--|--|--|--|--|--|--|--|--|--|--|--|--|--|--|--|--|--|--|--|--|--|--|--|--|--|--|--|--|--|--|--|--|--|--|--|--|--|--|--|--|--|--|--|--|--|--|--|--|--|--|--|--|--|--|--|--|--|--|--|--|--|--|--|--|--|--|--|--|--|--|--|--|--|--|--|--|--|--|--|--|--|--|--|--|--|--|--|--|--|--|--|--|--|--|--|--|--|--|--|--|--|--|--|--|--|--|--|--|--|--|--|--|--|--|--|--|--|--|--|--|--|--|--|--|--|--|--|--|--|--|--|--|--|--|--|--|--|--|--|--|--|--|--|--|--|--|--|--|--|--|--|--|--|--|--|--|--|--|--|--|--|--|--|--|--|--|--|--|--|--|--|--|--|--|--|--|--|--|--|--|--|--|--|--|--|--|--|--|--|--|--|--|--|--|--|--|--|--|--|--|--|--|--|--|--|--|--|--|--|--|--|--|--|--|--|--|--|--|--|--|--|--|--|--|--|--|--|--|--|--|--|--|--|--|--|--|--|--|--|--|--|--|--|--|--|--|--|--|--|--|--|--|--|--|--|--|--|--|--|--|--|--|--|--|--|--|--|--|--|--|--|--|--|--|--|--|--|--|--|--|--|--|--|--|--|--|--|--|--|--|--|--|--|--|--|--|--|--|--|--|--|--|--|--|--|--|--|--|--|--|--|--|--|--|--|--|--|--|--|--|--|--|--|--|--|--|--|--|--|--|--|--|--|--|--|--|--|--|--|--|--|--|--|--|--|--|--|--|--|--|--|--|--|--|--|--|--|--|--|--|--|--|--|--|--|--|--|--|--|--|--|--|--|--|--|--|--|--|--|--|--|--|--|--|--|--|--|--|--|--|--|--|--|--|--|--|--|--|--|--|--|--|--|--|--|--|--|--|--|--|--|--|--|--|--|--|--|--|--|--|--|--|--|--|--|--|--|--|--|--|--|--|--|--|--|--|--|--|--|--|--|--|--|--|--|--|--|--|--|--|--|--|--|--|--|--|--|--|--|--|--|--|--|--|--|--|--|--|--|--|--|--|--|--|--|--|--|--|--|--|--|--|--|--|--|--|--|--|--|--|--|--|--|--|--|--|--|--|--|--|--|--|--|--|--|--|--|--|--|--|--|--|--|--|--|--|--|--|--|--|--|--|--|--|--|--|--|--|--|--|--|--|--|--|--|--|--|--|--|--|--|--|--|--|--|--|--|--|--|--|--|--|--|--|--|--|--|--|--|--|--|--|--|--|--|--|--|--|--|--|--|--|--|--|--|--|--|--|--|--|--|--|--|--|--|--|--|--|--|--|--|--|--|--|--|--|--|--|--|--|--|--|--|--|--|--|--|--|--|--|--|--|--|--|--|--|--|--|--|--|--|--|--|--|--|--|--|--|--|--|--|--|--|--|--|--|--|--|--|--|--|--|--|--|--|--|--|--|--|--|--|--|--|--|--|--|--|--|--|--|--|--|--|--|--|--|--|--|--|--|--|--|--|--|--|--|--|--|--|--|--|--|--|--|--|--|--|--|--|--|--|--|--|--|--|--|--|--|--|--|--|--|--|--|--|--|--|--|--|--|--|--|
|  |  |  |  |  |  |  |  |  |  |  |  |  |  |  |  |  |  |  |  |  |  |  |  |  |  |  |  |  |  |  |  |  |  |  |  |  |  |  |  |  |  |  |  |  |  |  |  |  |  |  |  |  |  |  |  |  |  |  |  |  |  |  |  |  |  |  |  |  |  |  |  |  |  |  |  |  |  |  |  |  |  |  |  |  |  |  |  |  |  |  |  |  |  |  |  |  |  |  |  |  |  |  |  |  |  |  |  |  |  |  |  |  |  |  |  |  |  |  |  |  |  |  |  |  |  |  |  |  |  |  |  |  |  |  |  |  |  |  |  |  |  |  |  |  |  |  |  |  |  |  |  |  |  |  |  |  |  |  |  |  |  |  |  |  |  |  |  |  |  |  |  |  |  |  |  |  |  |  |  |  |  |  |  |  |  |  |  |  |  |  |  |  |  |  |  |  |  |  |  |  |  |  |  |  |  |  |  |  |  |  |  |  |  |  |  |  |  |  |  |  |  |  |  |  |  |  |  |  |  |  |  |  |  |  |  |  |  |  |  |  |  |  |  |  |  |  |  |  |  |  |  |  |  |  |  |  |  |  |  |  |  |  |  |  |  |  |  |  |  |  |  |  |  |  |  |  |  |  |  |  |  |  |  |  |  |  |  |  |  |  |  |  |  |  |  |  |  |  |  |  |  |  |  |  |  |  |  |  |  |  |  |  |  |  |  |  |  |  |  |  |  |  |  |  |  |  |  |  |  |  |  |  |  |  |  |  |  |  |  |  |  |  |  |  |  |  |  |  |  |  |  |  |  |  |  |  |  |  |  |  |  |  |  |  |  |  |  |  |  |  |  |  |  |  |  |  |  |  |  |  |  |  |  |  |  |  |  |  |  |  |  |  |  |  |  |  |  |  |  |  |  |  |  |  |  |  |  |  |  |  |  |  |  |  |  |  |  |  |  |  |  |  |  |  |  |  |  |  |  |  |  |  |  |  |  |  |  |  |  |  |  |  |  |  |  |  |  |  |  |  |  |  |  |  |  |  |  |  |  |  |  |  |  |  |  |  |  |  |  |  |  |  |  |  |  |  |  |  |  |  |  |  |  |  |  |  |  |  |  |  |  |  |  |  |  |  |  |  |  |  |  |  |  |  |  |  |  |  |  |  |  |  |  |  |  |  |  |  |  |  |  |  |  |  |  |  |  |  |  |  |  |  |  |  |  |  |  |  |  |  |  |  |  |  |  |  |  |  |  |  |  |  |  |  |  |  |  |  |  |  |  |  |  |  |  |  |  |  |  |  |  |  |  |  |  |  |  |  |  |  |  |  |  |  |  |  |  |  |  |  |  |  |  |  |  |  |  |  |  |  |  |  |  |  |  |  |  |  |  |  |  |  |  |  |  |  |  |  |  |  |  |  |  |  |  |  |  |  |  |  |  |  |  |  |  |  |  |  |  |  |  |  |  |  |  |  |  |  |  |  |  |  |  |  |  |  |  |  |  |  |  |  |  |  |  |  |  |  |  |  |  |  |  |  |  |  |  |  |  |  |  |  |  |  |  |  |  |  |  |  |  |  |  |  |  |  |  |  |  |  |  |  |  |  |  |  |  |  |  |  |  |  |  |  |  |  |  |  |  |  |  |  |  |  |  |  |  |  |  |  |  |  |  |  |  |  |  |  |  |  |  |  |  |  |  |  |  |  |  |  |  |  |  |  |  |  |  |  |  |  |  |  |  |  |  |  |  |  |  |  |  |  |  |  |  |  |  |  |  |  |  |  |  |  |  |  |  |  |  |  |  |  |  |  |  |  |  |  |  |  |  |  |  |  |  |  |  |  |  |  |  |  |  |  |  |  |  |  |  |  |  |  |  |  |  |  |  |  |  |  |  |  |  |  |  |  |  |  |  |  |  |  |  |  |  |  |  |  |  |  |  |  |  |  |  |  |  |  |  |  |  |  |  |  |  |  |  |  |  |  |  |  |  |  |  |  |  |  |  |  |  |  |  |  |  |  |  |  |  |  |  |  |  |  |  |  |  |  |  |  |  |  |  |  |  |  |  |  |  |  |  |  |  |  |  |  |  |  |  |  |  |  |  |  |  |  |  |  |  |  |  |  |  |  |  |  |  |  |  |  |  |  |  |  |  |  |  |  |  |  |  |  |  |  |  |  |  |  |  |  |  |  |  |  |  |  |  |  |  |  |  |  |  |  |  |  |  |  |  |  |  |  |  |  |  |  |  |  |  |  |  |  |  |  |  |  |  |  |  |  |  |  |  |  |  |  |  |  |  |  |  |  |  |  |  |  |  |  |  |  |  |  |  |  |  |  |  |  |  |  |  |  |  |  |  |  |  |  |  |  |  |  |  |  |  |  |  |  |  |  |  |  |  |  |  |  |  |  |  |  |  |  |  |  |  |  |  |  |  |  |  |  |  |  |  |  |  |  |  |  |  |  |  |  |  |  |  |  |  |  |  |  |  |  |  |  |  |  |  |  |  |  |  |  |  |  |  |  |  |  |  |  |  |  |  |  |  |  |  |  |  |  |  |  |  |  |  |  |  |  |  |  |  |  |  |  |  |  |  |  |  |  |  |  |  |  |  |  |  |  |  |  |  |  |  |  |  |  |  |  |  |  |  |  |  |  |  |  |  |  |  |  |  |  |  |  |  |  |  |  |  |  |  |  |  |  |  |  |  |  |  |  |  |  |  |  |  |  |  |  |  |  |  |  |  |  |  |  |  |  |  |  |  |  |  |  |  |  |  |  |  |  |  |  |  |  |  |  |  |  |  |  |  |  |  |  |  |  |  |  |  |  |  |  |  |  |  |  |  |  |  |  |  |  |  |  |  |  |  |  |  |  |  |  |  |  |  |  |  |  |  |  |  |  |  |  |  |  |  |  |  |  |  |  |  |  |  |  |  |  |  |  |  |  |  |  |  |  |  |  |  |  |  |  |  |  |  |  |  |  |  |  |  |  |  |  |  |  |  |  |  |  |  |  |  |  |  |  |  |  |  |  |  |  |  |  |  |  |  |  |  |  |  |  |  |  |  |  |  |  |  |  |  |  |  |  |  |  |  |  |  |  |  |  |  |  |  |  |  |  |  |  |  |  |  |  |  |  |  |  |  |  |  |  |  |  |  |  |  |  |  |  |  |  |  |  |  |  |  |  |  |  |  |  |  |  |  |  |  |  |  |  |  |  |  |  |  |  |  |  |  |  |  |  |  |  |  |  |  |  |  |  |  |  |  |  |  |  |  |  |  |  |  |  |  |  |  |  |  |  |  |
|--|--|--|--|--|--|--|--|--|--|--|--|--|--|--|--|--|--|--|--|--|--|--|--|--|--|--|--|--|--|--|--|--|--|--|--|--|--|--|--|--|--|--|--|--|--|--|--|--|--|--|--|--|--|--|--|--|--|--|--|--|--|--|--|--|--|--|--|--|--|--|--|--|--|--|--|--|--|--|--|--|--|--|--|--|--|--|--|--|--|--|--|--|--|--|--|--|--|--|--|--|--|--|--|--|--|--|--|--|--|--|--|--|--|--|--|--|--|--|--|--|--|--|--|--|--|--|--|--|--|--|--|--|--|--|--|--|--|--|--|--|--|--|--|--|--|--|--|--|--|--|--|--|--|--|--|--|--|--|--|--|--|--|--|--|--|--|--|--|--|--|--|--|--|--|--|--|--|--|--|--|--|--|--|--|--|--|--|--|--|--|--|--|--|--|--|--|--|--|--|--|--|--|--|--|--|--|--|--|--|--|--|--|--|--|--|--|--|--|--|--|--|--|--|--|--|--|--|--|--|--|--|--|--|--|--|--|--|--|--|--|--|--|--|--|--|--|--|--|--|--|--|--|--|--|--|--|--|--|--|--|--|--|--|--|--|--|--|--|--|--|--|--|--|--|--|--|--|--|--|--|--|--|--|--|--|--|--|--|--|--|--|--|--|--|--|--|--|--|--|--|--|--|--|--|--|--|--|--|--|--|--|--|--|--|--|--|--|--|--|--|--|--|--|--|--|--|--|--|--|--|--|--|--|--|--|--|--|--|--|--|--|--|--|--|--|--|--|--|--|--|--|--|--|--|--|--|--|--|--|--|--|--|--|--|--|--|--|--|--|--|--|--|--|--|--|--|--|--|--|--|--|--|--|--|--|--|--|--|--|--|--|--|--|--|--|--|--|--|--|--|--|--|--|--|--|--|--|--|--|--|--|--|--|--|--|--|--|--|--|--|--|--|--|--|--|--|--|--|--|--|--|--|--|--|--|--|--|--|--|--|--|--|--|--|--|--|--|--|--|--|--|--|--|--|--|--|--|--|--|--|--|--|--|--|--|--|--|--|--|--|--|--|--|--|--|--|--|--|--|--|--|--|--|--|--|--|--|--|--|--|--|--|--|--|--|--|--|--|--|--|--|--|--|--|--|--|--|--|--|--|--|--|--|--|--|--|--|--|--|--|--|--|--|--|--|--|--|--|--|--|--|--|--|--|--|--|--|--|--|--|--|--|--|--|--|--|--|--|--|--|--|--|--|--|--|--|--|--|--|--|--|--|--|--|--|--|--|--|--|--|--|--|--|--|--|--|--|--|--|--|--|--|--|--|--|--|--|--|--|--|--|--|--|--|--|--|--|--|--|--|--|--|--|--|--|--|--|--|--|--|--|--|--|--|--|--|--|--|--|--|--|--|--|--|--|--|--|--|--|--|--|--|--|--|--|--|--|--|--|--|--|--|--|--|--|--|--|--|--|--|--|--|--|--|--|--|--|--|--|--|--|--|--|--|--|--|--|--|--|--|--|--|--|--|--|--|--|--|--|--|--|--|--|--|--|--|--|--|--|--|--|--|--|--|--|--|--|--|--|--|--|--|--|--|--|--|--|--|--|--|--|--|--|--|--|--|--|--|--|--|--|--|--|--|--|--|--|--|--|--|--|--|--|--|--|--|--|--|--|--|--|--|--|--|--|--|--|--|--|--|--|--|--|--|--|--|--|--|--|--|--|--|--|--|--|--|--|--|--|--|--|--|--|--|--|--|--|--|--|--|--|--|--|--|--|--|--|--|--|--|--|--|--|--|--|--|--|--|--|--|--|--|--|--|--|--|--|--|--|--|--|--|--|--|--|--|--|--|--|--|--|--|--|--|--|--|--|--|--|--|--|--|--|--|--|--|--|--|--|--|--|--|--|--|--|--|--|--|--|--|--|--|--|--|--|--|--|--|--|--|--|--|--|--|--|--|--|--|--|--|--|--|--|--|--|--|--|--|--|--|--|--|--|--|--|--|--|--|--|--|--|--|--|--|--|--|--|--|--|--|--|--|--|--|--|--|--|--|--|--|--|--|--|--|--|--|--|--|--|--|--|--|--|--|--|--|--|--|--|--|--|--|--|--|--|--|--|--|--|--|--|--|--|--|--|--|--|--|--|--|--|--|--|--|--|--|--|--|--|--|--|--|--|--|--|--|--|--|--|--|--|--|--|--|--|--|--|--|--|--|--|--|--|--|--|--|--|--|--|--|--|--|--|--|--|--|--|--|--|--|--|--|--|--|--|--|--|--|--|--|--|--|--|--|--|--|--|--|--|--|--|--|--|--|--|--|--|--|--|--|--|--|--|--|--|--|--|--|--|--|--|--|--|--|--|--|--|--|--|--|--|--|--|--|--|--|--|--|--|--|--|--|--|--|--|--|--|--|--|--|--|--|--|--|--|--|--|--|--|--|--|--|--|--|--|--|--|--|--|--|--|--|--|--|--|--|--|--|--|--|--|--|--|--|--|--|--|--|--|--|--|--|--|--|--|--|--|--|--|--|--|--|--|--|--|--|--|--|--|--|--|--|--|--|--|--|--|--|--|--|--|--|--|--|--|--|--|--|--|--|--|--|--|--|--|--|--|--|--|--|--|--|--|--|--|--|--|--|--|--|--|--|--|--|--|--|--|--|--|--|--|--|--|--|--|--|--|--|--|--|--|--|--|--|--|--|--|--|--|--|--|--|--|--|--|--|--|--|--|--|--|--|--|--|--|--|--|--|--|--|--|--|--|--|--|--|--|--|--|--|--|--|--|--|--|--|--|--|--|--|--|--|--|--|--|--|--|--|--|--|--|--|--|--|--|--|--|--|--|--|--|--|--|--|--|--|--|--|--|--|--|--|--|--|--|--|--|--|--|--|--|--|--|--|--|--|--|--|--|--|--|--|--|--|--|--|--|--|--|--|--|--|--|--|--|--|--|--|--|--|--|--|--|--|--|--|--|--|--|--|--|--|--|--|--|--|--|--|--|--|--|--|--|--|--|--|--|--|--|--|--|--|--|--|--|--|--|--|--|--|--|--|--|--|--|--|--|--|--|--|--|--|--|--|--|--|--|--|--|--|--|--|--|--|--|--|--|--|--|--|--|--|--|--|--|--|--|--|--|--|--|--|--|--|--|--|--|--|--|--|--|--|--|--|--|--|--|--|--|--|--|--|--|--|--|--|--|--|--|--|--|--|--|--|--|--|--|--|--|--|--|--|--|--|--|--|--|--|--|--|--|--|--|--|--|--|--|--|--|--|--|

|      |         |         |         |         |
|------|---------|---------|---------|---------|
| 1754 | -0.0615 | -0.3354 | -0.4338 | -0.1141 |
| 1755 | -0.1455 | -0.5353 | -0.6336 | -0.1139 |
| 1756 | -0.0894 | -0.2384 | -0.3610 | -0.1138 |
| 1757 | -0.3651 | -0.3557 | -0.1620 | -0.1135 |
| 1758 | -1.3621 | 1.0419  | 1.0079  | -0.1133 |
| 1759 | -0.5472 | -0.1454 | -0.4668 | -0.1125 |
| 1760 | -0.1495 | -0.1495 | -0.7217 | -0.1120 |
| 1761 | -0.2347 | -0.2720 | -0.3299 | -0.1117 |
| 1762 | -0.2778 | -0.1634 | -0.3054 | -0.1105 |
| 1763 | -0.2787 | -0.1384 | -0.7391 | -0.1103 |
| 1764 | -0.0481 | -0.4436 | -0.0609 | -0.1096 |
| 1765 | -0.1726 | -0.1811 | -0.3183 | -0.1085 |
| 1766 | -0.4540 | -0.1736 | -0.5138 | -0.1082 |
| 1767 | -0.1140 | -0.0694 | -0.6700 | -0.1074 |
| 1768 | -0.3640 | -0.4758 | -0.2693 | -0.1073 |
| 1769 | -0.0899 | -0.2386 | -1.1322 | -0.1048 |
| 1770 | -0.7658 | -0.5289 | -0.4155 | -0.1045 |
| 1771 | -0.0899 | -0.1789 | -0.0504 | -0.1044 |
| 1772 | -0.2397 | -0.3096 | -0.6987 | -0.1041 |
| 1773 | -0.3410 | -0.3885 | -0.1490 | -0.1031 |
| 1774 | -0.3036 | -0.4449 | -0.1057 | -0.1029 |
| 1775 | -0.1409 | -0.6136 | -0.0073 | -0.1023 |
| 1776 | -0.4698 | -0.3473 | -0.3612 | -0.1018 |
| 1777 | -0.2150 | -0.1568 | -0.0000 | -0.1016 |
| 1778 | -0.2822 | -0.0634 | -0.0000 | -0.1016 |
| 1779 | -1.1332 | -0.4705 | -0.1547 | -0.1007 |
| 1780 | -0.6934 | -0.5805 | -0.6745 | -0.1004 |
| 1781 | -1.5129 | -1.3501 | -0.3716 | -0.1000 |
| 1782 | -0.1327 | -0.0511 | -0.5885 | -0.0999 |
| 1783 | -0.0698 | -0.0000 | -0.1259 | -0.0996 |
| 1784 | -0.0910 | -0.6509 | -0.6002 | -0.0987 |
| 1785 | -0.2284 | -0.0000 | -0.2079 | -0.0986 |
| 1786 | -1.1653 | -0.1040 | -1.0511 | -0.0981 |
| 1787 | -0.3582 | -0.5930 | -0.8199 | -0.0977 |
| 1788 | -0.1787 | -0.4142 | -0.1684 | -0.0972 |
| 1789 | -0.0899 | -0.4129 | -0.4584 | -0.0970 |
| 1790 | -0.2620 | -0.0000 | -0.3944 | -0.0957 |
| 1791 | -0.2788 | -0.3056 | -0.2403 | -0.0952 |
| 1792 | -0.5132 | -0.0000 | -0.3469 | -0.0951 |
| 1793 | -1.9005 | -0.6255 | -0.6410 | -0.0949 |
| 1794 | -0.1114 | -0.3151 | -0.2024 | -0.0948 |
| 1795 | -0.0787 | -0.1263 | -0.6741 | -0.0947 |
| 1796 | -0.2448 | -0.1110 | -0.2286 | -0.0944 |
| 1797 | -0.2200 | -0.0917 | -0.1988 | -0.0937 |
| 1798 | -0.4507 | -0.2184 | -0.1521 | -0.0937 |
| 1799 | -0.1008 | -0.2184 | -0.0926 | -0.0936 |
| 1800 | -0.1299 | -0.4502 | -1.1509 | -0.0925 |
| 1801 | -0.2377 | -0.0769 | -0.6730 | -0.0904 |
| 1802 | -0.5946 | -0.5503 | -0.7779 | -0.0901 |
| 1803 | -0.4585 | -0.2112 | -0.1087 | -0.0900 |
| 1804 | -0.5434 | -0.2875 | -0.7896 | -0.0892 |
| 1805 | -0.5362 | -0.0453 | -0.6865 | -0.0891 |
| 1806 | -0.7893 | -1.0208 | -0.1772 | -0.0887 |
| 1807 | -0.2901 | -0.6477 | -0.6670 | -0.0885 |
| 1808 | -0.1319 | -0.5046 | -0.2183 | -0.0883 |
| 1809 | -0.4391 | -0.2058 | -0.8418 | -0.0878 |
| 1810 | -0.3991 | -0.2784 | -0.1461 | -0.0876 |
| 1811 | -0.3296 | -0.0549 | -0.4085 | -0.0873 |
| 1812 | -0.2445 | -0.7727 | -0.5088 | -0.0864 |
| 1813 | -0.0801 | -1.0501 | -0.2584 | -0.0860 |
| 1814 | -0.3371 | -0.0953 | -0.2515 | -0.0841 |
| 1815 | -0.9416 | -0.5880 | -0.1122 | -0.0835 |
| 1816 | -0.2460 | -0.4685 | -0.0951 | -0.0828 |
| 1817 | -0.5477 | -0.0588 | -0.3080 | -0.0827 |
| 1818 | -0.4385 | -0.2478 | -0.4089 | -0.0815 |
| 1819 | -1.0823 | -0.6502 | -0.6500 | -0.0813 |
| 1820 | -0.1399 | -0.1185 | -0.1191 | -0.0811 |
| 1821 | -0.0640 | -0.2617 | -0.1356 | -0.0810 |
| 1822 | -0.3336 | -0.6010 | -0.2119 | -0.0806 |
| 1823 | -0.0401 | -0.1965 | -0.2606 | -0.0800 |
| 1824 | -0.0521 | -0.0411 | -0.9596 | -0.0795 |
| 1825 | -0.2686 | -0.3069 | -0.5948 | -0.0785 |
| 1826 | -0.0726 | -0.8813 | -1.4957 | -0.0783 |
| 1827 | -0.9790 | -0.4731 | -0.4284 | -0.0775 |
| 1828 | -1.2983 | -0.0000 | -0.5661 | -0.0772 |
| 1829 | -0.3159 | -0.1626 | -0.3775 | -0.0765 |
| 1830 | -0.9738 | -0.2951 | -0.4286 | -0.0763 |
| 1831 | -0.6883 | -0.0000 | -0.7873 | -0.0759 |
| 1832 | -0.1132 | -0.1074 | -0.1074 | -0.0756 |
| 1833 | -0.0111 | -0.5161 | -1.2223 | -0.0755 |
| 1834 | -1.4330 | -0.6972 | -0.1987 | -0.0753 |
| 1835 | -0.0947 | -0.1519 | -0.0612 | -0.0752 |
| 1836 | -0.1258 | -0.1392 | -0.1389 | -0.0751 |
| 1837 | -0.5700 | -0.1006 | -0.9069 | -0.0750 |
| 1838 | -0.0000 | -0.4247 | -0.0222 | -0.0746 |
| 1839 | -0.3658 | -0.0000 | -0.3927 | -0.0738 |
| 1840 | -0.0818 | -0.3931 | -0.3430 | -0.0737 |
| 1841 | -0.3510 | -0.0770 | -0.1659 | -0.0736 |
| 1842 | -0.2191 | -0.2969 | -0.0000 | -0.0734 |
| 1843 | -0.1898 | -0.3430 | -0.1088 | -0.0730 |
| 1844 | -0.1969 | -0.2154 | -0.6508 | -0.0729 |
| 1845 | -0.3615 | -0.5488 | -0.0000 | -0.0728 |
| 1846 | -0.6071 | -0.8569 | -0.1531 | -0.0721 |
| 1847 | -0.1897 | -0.7041 | -0.1966 | -0.0707 |
| 1848 | -0.4682 | -0.1297 | -0.2823 | -0.0707 |
| 1849 | -0.5485 | -0.6534 | -0.3931 | -0.0705 |
| 1850 | -0.1061 | -0.8236 | -0.4048 | -0.0703 |
| 1851 | -0.0586 | -0.3249 | -0.8442 | -0.0702 |
| 1852 | -0.1607 | -0.5353 | -0.3123 | -0.0697 |
| 1853 | -0.4455 | -0.2638 | -0.0861 | -0.0697 |
| 1854 | -1.0216 | -0.8443 | -0.5969 | -0.0689 |
| 1855 | -0.6286 | -0.4705 | -0.2735 | -0.0686 |
| 1856 | -0.2138 | -0.0000 | -0.0000 | -0.0684 |
| 1857 | -0.2135 | -0.4094 | -0.0000 | -0.0678 |
| 1858 | -0.3344 | -0.1666 | -0.3015 | -0.0675 |
| 1859 | -0.2218 | -0.9425 | -0.6796 | -0.0671 |
| 1860 | -0.5718 | -0.3335 | -0.3430 | -0.0670 |
| 1861 | -0.2434 | -0.0441 | -0.5962 | -0.0665 |
| 1862 | -0.1523 | -0.3807 | -0.0849 | -0.0660 |
| 1863 | -0.0626 | -0.3289 | -1.1788 | -0.0659 |
| 1864 | -0.0938 | -0.3682 | -0.4332 | -0.0659 |
| 1865 | -0.6345 | -1.1725 | -0.1579 | -0.0657 |
| 1866 | -0.6824 | -0.1838 | -0.3645 | -0.0654 |
| 1867 | -0.5789 | -0.2434 | -0.8025 | -0.0653 |
| 1868 | -0.0794 | -0.1797 | -0.1776 | -0.0652 |
| 1869 | -0.5995 | -0.3138 | -0.3070 | -0.0648 |
| 1870 | -0.1095 | -0.2139 | -0.3724 | -0.0648 |
| 1871 | -0.1642 | -0.6163 | -0.3329 | -0.0641 |
| 1872 | -0.0000 | -0.1369 | -0.2500 | -0.0641 |
| 1873 | -1.1333 | -0.2818 | -0.3597 | -0.0641 |
| 1874 | -0.1465 | -0.3865 | -0.2750 | -0.0638 |
| 1875 | -0.1707 | -0.0963 | -0.4071 | -0.0637 |
| 1876 | -0.2275 | -0.3204 | -0.2359 | -0.0631 |
| 1877 | -0.0000 | -0.0000 | -0.4517 | -0.0629 |
| 1878 | -0.0000 | -0.3954 | -0.0863 | -0.0622 |
| 1879 | -0.0000 | -0.2114 | -0.4089 | -0.0620 |

|   |         |                                                                                                        |
|---|---------|--------------------------------------------------------------------------------------------------------|
| 0 | QBEM8   | Phosphate carrier protein, mitochondrial                                                               |
| 0 | Q9JMH9  | Unconventional myosin-XVIIIa                                                                           |
| 0 | Q08943  | FACT complex subunit SSRP1                                                                             |
| 0 | Q099K8  | Dynactin subunit 2                                                                                     |
| 0 | Q0907X3 | Dual specificity protein phosphatase 3                                                                 |
| 0 | Q92ZAS  | Arginyl-RNA-protein transferase 1                                                                      |
| 0 | Q9VQ29  |                                                                                                        |
| 0 | Q08788  | Dynactin subunit 1                                                                                     |
| 0 | Q3V1L4  | Cytosolic purine 5-nucleotidase                                                                        |
| 0 | Q8C0T5  | Signal-induced proliferation-associated 1-like protein 1                                               |
| 0 | P24547  | Inosine-5-monophosphate dehydrogenase 2                                                                |
| 0 | Q8K222  | Pre-mRNA-processing factor 39                                                                          |
| 0 | Q6N2L6  | Tonsoku-like protein                                                                                   |
| 0 | P13439  | Uridine 5-monophosphate synthase;Orotate phosphoribosyltransferase;Orotidine 5-phosphate dehydrogenase |
| 0 | Q8B005  | Zinc finger CCH domain-containing protein 14                                                           |
| 0 | Q92JN5  | Spliceosome RNA helicase Ddx39b                                                                        |
| 0 | Q08293  | Uncharacterized protein C17orf85 homolog                                                               |
| 0 | Q60790  | Ras GTPase-activating protein 3                                                                        |
| 0 | Q60597  | 2-oxoglutarate dehydrogenase, mitochondrial                                                            |
| 0 | Q6P5E4  | UDP-glucose:glycoprotein glucosyltransferase 1                                                         |
| 0 | Q090I7  | YLP motif-containing protein 1                                                                         |
| 0 | Q3U319  | E3 ubiquitin-protein ligase BRE1B                                                                      |
| 0 | Q922G6  | Protein sel-1 homolog 1                                                                                |
| 0 | Q9D0R8  | Protein LSM12 homolog                                                                                  |
| 0 | Q3U1B0  |                                                                                                        |
| 0 | Q8B9E3  | V-type proton ATPase subunit H                                                                         |
| 0 | Q6P9J9  | Anoctamin-5                                                                                            |
| 0 | Q9CPX7  | 28S ribosomal protein S16, mitochondrial                                                               |
| 0 | Q9C555  | E3 ubiquitin-protein ligase RNF213                                                                     |
| 0 | Q9CSN1  | SNW domain-containing protein 1                                                                        |
| 0 | Q3UEB3  | Poly(U)-binding-splicing factor PUF60                                                                  |
| 0 | Q60715  | Prolyl 4-hydroxylase subunit alpha-1                                                                   |
| 0 | Q924T3  | DNA repair protein XRCC4                                                                               |
| 0 | Q54956  | DNA polymerase epsilon subunit 2                                                                       |
| 0 | Q8CBY1  | Protein Smaug homolog 1                                                                                |
| 0 | P70127  | Inositol 1,4,5-trisphosphate receptor type 3                                                           |
| 0 | P08003  | Protein disulfide-isomerase A4                                                                         |
| 0 | P52561  | Homeobox protein Rhox5                                                                                 |
| 0 | Q8K0D5  | Elongation factor G, mitochondrial                                                                     |
| 0 | P68388  | Tubulin alpha-4A chain;Tubulin alpha-8 chain                                                           |
| 0 | Q9C9X9  | RNA-binding protein 33                                                                                 |
| 0 | Q91XU0  | ATPase WRNIP1                                                                                          |
| 0 | Q80U22  | Protein SDA1 homolog                                                                                   |
| 0 | P06537  | Glucocorticoid receptor                                                                                |
| 0 | Q99104  | Unconventional myosin-Va                                                                               |
| 0 | Q9C8B4  | N-alpha-acetyltransferase 15, NatA auxiliary subunit                                                   |
| 0 | P98083  | SHC transforming protein 1                                                                             |
| 0 | Q8B9V5  | Protein phosphatase methyltransferase 1                                                                |
| 0 | Q8VDP6  | COP-diacylglycerol-inositol 3-phosphatidyltransferase                                                  |
| 0 | Q8B7W3  | Exosome complex component MTR3                                                                         |
| 0 | Q01730  | Ras suppressor protein 1                                                                               |
| 0 | P20664  | DNA primase;DNA primase small subunit                                                                  |
| 0 | P58501  | PAX3- and PAX7-binding protein 1                                                                       |
| 0 | Q9CPC8  | ATP synthase subunit g, mitochondrial                                                                  |
| 0 | Q8VDM1  | Zinc finger CCH-type with G patch domain-containing protein                                            |
| 0 | P1A1JN2 |                                                                                                        |
| 0 | Q8VHM5  |                                                                                                        |
| 0 | Q8BMS4  | Ubiquitinone biosynthesis O-methyltransferase, mitochondrial                                           |
| 0 | P97770  | THUMP domain-containing protein 3                                                                      |
| 0 | Q924H5  | DNA repair protein RAD51 homolog 3                                                                     |
| 0 | Q35375  | Neurospilin-2                                                                                          |
| 0 | Q9CWX3  | Calycylin-binding protein                                                                              |
| 0 | Q9R112  | Sulfide:quinone oxidoreductase, mitochondrial                                                          |
| 0 | P16110  | Galectin;Galectin-3                                                                                    |
| 0 | P52432  | DNA-directed RNA polymerases I and III subunit RPAC1                                                   |
| 0 | Q55W88  |                                                                                                        |
| 0 | Q9C0T5  | NADH dehydrogenase [ubiquinone] 1 alpha subcomplex subunit 6                                           |
| 0 | Q8B384  | Vesicle transport through interaction with t-SNAREs homolog 1B                                         |
| 0 | Q099L6  | ATP-binding cassette sub-family F member 2                                                             |
| 0 | Q5XJE5  | RNA polymerase-associated protein LEO1                                                                 |
| 0 | Q62018  | RNA polymerase-associated protein CTR9 homolog                                                         |
| 0 | Q922Q4  | Pyrolysine-5-carboxylate reductase 2                                                                   |
| 0 | P83887  | Tubulin gamma-1 chain;Tubulin gamma-2 chain                                                            |
| 0 | Q8VEJ9  | Vacuolar protein sorting-associated protein 4A                                                         |
| 0 | P12197  | 60S ribosomal protein L7a                                                                              |
| 0 | Q91HT7  | YTH domain-containing family protein 2                                                                 |
| 0 | Q9C0B5  | CDGSH iron-sulfur domain-containing protein 2                                                          |
| 0 | P70193  | Leucine-rich repeats and immunoglobulin-like domains protein 1                                         |
| 0 | A2A1T4  | Arginine/serine-rich protein PNISR                                                                     |
| 0 | Q3YXK2  | Scaffold attachment factor B1                                                                          |
| 0 | Q80729  | Arginine-glutamic acid dipeptide repeats protein                                                       |
| 0 | P37913  | DNA ligase 1;DNA ligase                                                                                |
| 0 | Q7M739  |                                                                                                        |
| 0 | A2B033  | Adenylyltransferase and sulfurtransferase MOC33;Molybdopterin-synthase adenylyltransferase;M           |
| 0 | Q9D1H8  | 39S ribosomal protein L53, mitochondrial                                                               |
| 0 | Q9D519  | Xanthine dehydrogenase/oxidase;Xanthine dehydrogenase;Xanthine oxidase                                 |
| 0 | Q8B5N5  | PHD finger protein 23                                                                                  |
| 0 | Q9WV70  | Nuclear complex protein 2 homolog                                                                      |
| 0 | Q8VEK3  | Heterogeneous nuclear ribonucleoprotein U                                                              |
| 0 | Q70404  | Vesicle-associated membrane protein 8                                                                  |
| 0 | Q8B8F4  | Dihydropyrimidine-residue acetyltransferase component of pyruvate dehydrogenase complex, m             |
| 0 | Q9DAM7  | Transmembrane protein 263                                                                              |
| 0 | Q9CVB6  | Actin-related protein 2/3 complex subunit 2                                                            |
| 0 | Q9CXT7  | Transmembrane protein 192                                                                              |
| 0 | Q92X21  | Heterogeneous nuclear ribonucleoprotein F;Heterogeneous nuclear ribonucleoprotein F, N-termi           |
| 0 | Q8BHD7  | Polypyrimidine tract-binding protein 3                                                                 |
| 0 | Q8B3K4  | Interferon regulatory factor 2-binding protein-like                                                    |
| 0 | Q8B5Y0  | Aspartyl/asparaginyl beta-hydroxylase                                                                  |
| 0 | Q8BLU0  |                                                                                                        |
| 0 | Q62058  | La-related protein 1                                                                                   |
| 0 | Q9D0Q7  | 39S ribosomal protein L45, mitochondrial                                                               |
| 0 | Q80XC2  | tRNA (adenine(58)-N(1))-methyltransferase catalytic subunit TRMT61A                                    |
| 0 | G3XA17  |                                                                                                        |
| 0 | P46460  | Vesicle-fusing ATPase                                                                                  |
| 0 | Q9D187  | Mitotic spindle-associated MMXD complex subunit MIP18                                                  |
| 0 | P14869  | 60S acidic ribosomal protein P0                                                                        |
| 0 | Q6ZP97  | Lysine-specific demethylase 3B                                                                         |
| 0 | Q61183  | Poly(A) polymerase alpha                                                                               |
| 0 | Q91Y78  | Polyadenylate-binding protein                                                                          |
| 0 | Q8K480  | Metastasis-associated protein MTA1                                                                     |
| 0 | P12382  | ATP-dependent 6-phosphofructokinase, liver type                                                        |
| 0 | Q9D0U6  | Repressor of RNA polymerase III transcription MAF1;Repressor of RNA polymerase III transcription       |
| 0 | Q9CWC2  | RNA-binding protein 8A                                                                                 |
| 0 | Q9CWX4  | 60S ribosomal protein L11                                                                              |
| 0 | Q9JH83  | Y-box-binding protein 3                                                                                |
| 0 | Q35737  | Heterogeneous nuclear ribonucleoprotein H;Heterogeneous nuclear ribonucleoprotein H, N-termi           |
| 0 | Q6P580  | RRP12-like protein                                                                                     |
| 0 | P70452  | Syntaxin-4                                                                                             |
| 0 | Q921Q9  | Valine-tRNA ligase                                                                                     |
| 0 | Q8CGU1  | Calcium-binding and coiled-coil domain-containing protein 1                                            |
| 0 | Q9R045  | Angiotensin-related protein 2                                                                          |
| 0 | P56480  | ATP synthase subunit beta, mitochondrial                                                               |
| 0 | Q8B9K6  | YTH domain-containing family protein 3                                                                 |
| 0 | Q9CZC0  | Elongator complex protein 3                                                                            |
| 0 | Q6ZWX6  | Eukaryotic translation initiation factor 2 subunit 1                                                   |
| 0 | P97496  | SWI/SNF complex subunit SMARCC1                                                                        |

|                |            |   |
|----------------|------------|---|
| Gm25a3         | mmu:18674  |   |
| Myo18a         | mmu:360013 |   |
| Ssrp1          | mmu:20833  |   |
| Dctn2          | mmu:69654  |   |
| Dusp3          | mmu:72349  | 1 |
| Ate1           | mmu:11907  |   |
| Igapp3         | mmu:404710 |   |
| Dctn1          | mmu:13191  |   |
| Ntsc2          | mmu:76952  |   |
| Sipa1l1        | mmu:217692 |   |
| Impdh2         | mmu:23918  |   |
| Prpf39         |            |   |
| Tonsl          | mmu:72749  |   |
| e Umps         | mmu:22247  |   |
| Zc3h14         | mmu:75553  |   |
| Ddx39b         | mmu:53817  |   |
|                | mmu:66874  |   |
| Rasa3          | mmu:19414  |   |
| Ogdh           | mmu:18293  |   |
| Ugg1l          | mmu:320011 |   |
| Ylpm1          |            |   |
| Rnf40          | mmu:233900 | 1 |
| Sel1l          | mmu:20338  |   |
| Lsm12          | mmu:268490 |   |
| Sfb2c          | mmu:319322 |   |
| Atp6v1h        | mmu:108664 |   |
| Ano6           | mmu:105722 |   |
| Mprp16         | mmu:66242  |   |
| Rnf213         |            | 1 |
| Smn1           | mmu:66254  |   |
| Puf60          | mmu:67959  |   |
| P4ha1          | mmu:18451  |   |
| Xrcc4          | mmu:108138 |   |
| Pole2          | mmu:18974  |   |
| Samd4a         | mmu:74480  |   |
| Itp3r          | mmu:16440  |   |
| Pdia4          | mmu:12304  |   |
| Rhox5          |            |   |
| Ghm1           | mmu:28030  |   |
| Tuba4a7u       | mmu:22145  |   |
| Rbm33          | mmu:381626 |   |
| Wrnip1         | mmu:78903  |   |
| Sdad1          | mmu:231452 |   |
| Nr3c1          |            |   |
| Myo5a          | mmu:17918  |   |
| Naa15          | mmu:66897  |   |
| Shc1           | mmu:20416  |   |
| Ppme1          | mmu:72590  |   |
| Cdpt           | mmu:52858  |   |
| Exosc6         | mmu:72544  |   |
| Rsu1           |            |   |
| Prim1          | mmu:19075  |   |
| Paxbp1         | mmu:67367  |   |
| Atp5f          | mmu:27425  |   |
| Zgpat          | mmu:229007 |   |
| Eif2b3         | mmu:108067 |   |
| Hnnp1r         | mmu:74326  |   |
| Coq3           | mmu:230027 |   |
| Thumpd3        | mmu:14911  |   |
| Rad51c         | mmu:114714 |   |
| Nrp2           | mmu:18187  |   |
| Cacybp         | mmu:12301  |   |
| Sgpl1          | mmu:59010  |   |
| Lgal3          |            |   |
| Polr1c         | mmu:20016  |   |
| Rab1           |            |   |
| Ndufa6         | mmu:67130  | 1 |
| Vti1b          |            |   |
| Absc2          | mmu:27407  |   |
| Lec1           | mmu:235497 |   |
| Ccr9           | mmu:22083  |   |
| Pycr2          | mmu:69051  | 1 |
| Tubg1,Tub      | mmu:103733 |   |
| Vps4a          | mmu:116733 |   |
| Rpl7a          | mmu:27176  |   |
| Ythdf2         | mmu:213541 |   |
| Cisd2          | mmu:67006  |   |
| Lrig1          | mmu:16206  |   |
| Nsir           |            |   |
| Safb           | mmu:224903 |   |
| Rere           | mmu:68703  |   |
| Lig1           | mmu:16881  | 1 |
| Tpr            |            |   |
| Mocs3          | mmu:69372  |   |
| Mrp153         | mmu:68499  |   |
| Xdh            | mmu:22436  |   |
| Phf23          | mmu:78246  |   |
| Noc2l          |            |   |
| Gm28062        | mmu:51810  |   |
| Vamp8          | mmu:22320  |   |
| Dlat           | mmu:235339 |   |
| Tmem263        | mmu:103266 |   |
| Arpc2          | mmu:76709  |   |
| Tmem192        | mmu:73067  |   |
| ii Hnnp1f      | mmu:98758  |   |
| Ptpb3          | mmu:230257 |   |
| Irf2bp1        | mmu:238330 |   |
| Asph           | mmu:65973  |   |
| Flrt2          | mmu:399558 |   |
| Larp1          | mmu:73158  |   |
| Mrp145         | mmu:67036  |   |
| Tmem61a        | mmu:328162 |   |
| Eif4g2         |            |   |
| Nsf            | mmu:18195  |   |
| Fam96b         | mmu:68523  |   |
| Rplp0          | mmu:11837  |   |
| Kdm3b          |            |   |
| Papola         | mmu:18789  |   |
| Pabpc4,Gm10110 |            |   |
| Mta1           |            |   |
| Pkl1           | mmu:19641  |   |
| Maf1           | mmu:68877  |   |
| RBM8,Rbm       | mmu:60365  |   |
| Rpl11,Gm1      | mmu:67025  |   |
| Ybx3           | mmu:56449  |   |
| nni Hnnp1h     | mmu:59013  |   |
| Rrp12          | mmu:107094 |   |
| Stx4           | mmu:20909  | 1 |
| Vars           | mmu:22321  |   |
| Calcoo1        | mmu:67488  |   |
| Angp82         | mmu:26360  |   |
| Atg5b          | mmu:11947  |   |
| Ythdf3         | mmu:229096 |   |
| Elp3           | mmu:74195  |   |
| Eif2f1         | mmu:13665  |   |
| Smarcc1        | mmu:20588  |   |

|      |         |         |         |         |
|------|---------|---------|---------|---------|
| 1880 | -0.0634 | -0.5103 | -0.1275 | -0.0614 |
| 1881 | -0.0840 | 0.2684  | 0.0995  | -0.0613 |
| 1882 | 0.3081  | 0.6014  | 0.9317  | -0.0610 |
| 1883 | 0.4595  | 0.1923  |         | -0.0602 |
| 1884 | -0.0818 | 0.2452  | 0.8064  | -0.0602 |
| 1885 | 0.7596  | -0.5933 | 0.6024  | -0.0602 |
| 1886 | 0.3295  | -0.2937 | -0.1321 | -0.0601 |
| 1887 | -0.1045 | -0.0774 | 0.0945  | -0.0599 |
| 1888 | -0.5530 | -0.3727 | 0.0795  | -0.0599 |
| 1889 | 0.1055  | -0.2014 | 0.1178  | -0.0594 |
| 1890 | -0.3699 | -0.0733 |         | -0.0587 |
| 1891 | 0.1121  | 0.4532  | -0.2038 | -0.0582 |
| 1892 | 0.4532  | -0.7360 | -0.7355 | -0.0580 |
| 1893 | 0.2538  | 0.4126  | -0.5671 | -0.0586 |
| 1894 | -0.0818 |         | -0.3596 | -0.0586 |
| 1895 | -0.3481 | -0.1072 | 0.4034  | -0.0583 |
| 1896 | -0.3741 | -0.1507 | 0.4810  | -0.0581 |
| 1897 | -0.1081 | -0.5564 | 0.4870  | -0.0540 |
| 1898 | 1.0156  | 0.5569  | -0.1619 | -0.0509 |
| 1899 | 0.0726  | 0.0979  | -0.1995 | -0.0495 |
| 1900 | 1.0561  | -1.1349 | -1.1734 | -0.0484 |
| 1901 | -0.2812 | 0.3310  |         | -0.0484 |
| 1902 | -0.3213 | 1.0839  | 0.4345  | -0.0482 |
| 1903 | -0.0681 | 0.2861  | 0.3951  | -0.0481 |
| 1904 | -0.0777 |         |         | -0.0479 |
| 1905 | -0.0596 | -0.0587 | -0.1138 | -0.0475 |
| 1906 | -0.1309 | 0.5344  | 0.2325  | -0.0474 |
| 1907 | -0.7540 | -0.1094 | 0.4655  | -0.0454 |
| 1908 |         | -0.4911 | 0.1299  | -0.0449 |
| 1909 | -0.3315 | 0.0528  |         | -0.0447 |
| 1910 |         | 0.5771  | -0.3906 | -0.0441 |
| 1911 | -0.3315 | -0.2989 | 0.2721  | -0.0434 |
| 1912 | 0.4851  | 0.4545  | 0.2921  | -0.0433 |
| 1913 | 0.2761  | 1.1737  | -0.3780 | -0.0432 |
| 1914 | 0.2679  | 0.2567  | -0.3741 | -0.0430 |
| 1915 | 0.4788  | -0.1020 | 0.4548  | -0.0430 |
| 1916 | -0.4959 | 0.1821  | 0.1855  | -0.0414 |
| 1917 | -0.0649 | -0.2054 | 0.3373  | -0.0409 |
| 1918 | -0.6616 | 1.2959  | 0.7682  | -0.0401 |
| 1919 | -0.2788 | 0.2761  | 0.3109  | -0.0400 |
| 1920 | -0.3258 | -0.7805 | 0.2842  | -0.0396 |
| 1921 | -0.1132 | 0.2652  | 0.8386  | -0.0390 |
| 1922 | 0.1320  | -0.3689 | -0.1810 | -0.0386 |
| 1923 | 0.3190  | 0.5461  | 0.0385  | -0.0382 |
| 1924 | -0.1218 | 0.3259  | 0.4927  | -0.0382 |
| 1925 | -0.2249 | -0.0897 | -0.2855 | -0.0377 |
| 1926 | -0.6100 | 0.2404  |         | -0.0371 |
| 1927 | -0.0849 | 0.3131  | 0.3692  | -0.0365 |
| 1928 | -0.3865 | 0.3469  | -0.3822 | -0.0357 |
| 1929 | 0.3033  | 0.3067  | -0.0686 | -0.0346 |
| 1930 | -1.6569 | 1.4150  | 0.1529  | -0.0325 |
| 1931 | 0.5000  | 0.1940  | -0.0588 | -0.0324 |
| 1932 | -0.3440 | -0.4495 | 0.6137  | -0.0323 |
| 1933 | 0.2379  | 0.4111  | 0.6866  | -0.0322 |
| 1934 | 0.3113  |         | -0.2273 | -0.0322 |
| 1935 | 0.4832  | 0.6437  | 0.7658  | -0.0319 |
| 1936 | -0.0808 | -0.1454 | 0.2881  | -0.0318 |
| 1937 | 0.5859  | -0.2591 | 0.4060  | -0.0313 |
| 1938 | 0.4030  | -0.5957 | 0.1511  | -0.0310 |
| 1939 | -0.4519 |         | 0.3609  | -0.0304 |
| 1940 | -0.0445 | 0.0545  | 0.4579  | -0.0303 |
| 1941 | -0.1346 | 0.1258  | 0.4713  | -0.0301 |
| 1942 | -0.3959 | -0.8397 | 0.1776  | -0.0301 |
| 1943 | -0.1635 |         | 0.3222  | -0.0300 |
| 1944 | -0.9863 | -0.7056 | 0.0793  | -0.0298 |
| 1945 | -0.1206 | 0.4714  | -0.4703 | -0.0293 |
| 1946 | -0.3901 | 0.1821  |         | -0.0291 |
| 1947 | -0.0849 | -0.5414 | -0.1062 | -0.0289 |
| 1948 | -1.1265 | 1.1123  | 0.7518  | -0.0289 |
| 1949 | -0.6202 | 0.2205  | 0.0274  | -0.0278 |
| 1950 | 0.5725  | 0.1018  | -0.6370 | -0.0277 |
| 1951 | 0.1636  | 0.0647  | 0.0948  | -0.0268 |
| 1952 | -0.0550 | -0.1566 | 0.3264  | -0.0266 |
| 1953 | -0.5173 | 0.5758  | 0.2539  | -0.0257 |
| 1954 | 0.2281  | -0.2572 | 0.5257  | -0.0248 |
| 1955 | -0.0286 | -0.5455 | -0.4474 | -0.0247 |
| 1956 | -0.7358 | -0.1327 | -0.2868 | -0.0246 |
| 1957 | -0.1376 | -0.0487 | -0.2109 | -0.0243 |
| 1958 | -1.0583 | -0.1094 | 0.6736  | -0.0237 |
| 1959 | 0.1472  | 0.3317  | -0.0936 | -0.0237 |
| 1960 | -0.4200 | 0.0771  | 0.1900  | -0.0237 |
| 1961 | -0.3186 | 0.5857  | 0.2393  | -0.0236 |
| 1962 | -0.1148 | -0.4599 | 0.2638  | -0.0235 |
| 1963 | 0.6235  | -0.4386 | -0.4948 | -0.0235 |
| 1964 | 0.2431  | -0.7511 | -1.1542 | -0.0235 |
| 1965 | -0.4405 | 0.1034  | -0.6486 | -0.0235 |
| 1966 | -0.4379 | 0.6171  | -0.1346 | -0.0235 |
| 1967 | -0.1901 | 0.1821  | -0.1324 | -0.0235 |
| 1968 | -1.5155 | -0.2075 | -0.0647 | -0.0235 |
| 1969 | -0.5122 | -0.1528 | 0.0905  | -0.0235 |
| 1970 | 0.4922  | 0.3691  | -0.4321 | -0.0235 |
| 1971 | -0.1888 | 0.1886  | 0.0381  | -0.0235 |
| 1972 | 0.1571  | -0.2566 | -0.4183 | -0.0235 |
| 1973 | 0.2511  | 0.0797  | 0.0661  | -0.0235 |
| 1974 | 0.4057  | -0.2631 | -0.1973 | -0.0235 |
| 1975 | -0.1578 | 0.3940  | 0.3429  | -0.0235 |
| 1976 | -0.5999 | 0.3724  | -0.2760 | -0.0235 |
| 1977 | 0.2562  | -0.1652 | 0.7331  | -0.0235 |
| 1978 | 0.4371  | -0.9382 | -0.4993 | -0.0235 |
| 1979 | 0.0235  |         | -0.3485 | -0.0235 |
| 1980 | -2.1795 | 0.6514  | -0.2471 | -0.0235 |
| 1981 | -0.0551 | -0.3773 | 0.1205  | -0.0235 |
| 1982 | -0.2420 | 0.5397  | 0.5871  | -0.0235 |
| 1983 | 0.2073  | 0.4764  | 0.1330  | -0.0235 |
| 1984 | -0.5294 | 0.5751  | 0.3457  | -0.0235 |
| 1985 | -1.0914 | 0.6755  |         | -0.0235 |
| 1986 | -0.6368 | -0.0786 | 0.4727  | -0.0235 |
| 1987 | -0.1823 | -0.0878 | 0.1615  | -0.0235 |
| 1988 | 0.4592  | -0.1749 | -0.0928 | -0.0235 |
| 1989 | 0.3101  | -0.0842 | -0.2039 | -0.0235 |
| 1990 | -0.8970 | 0.1781  | 0.1006  | -0.0235 |
| 1991 | 0.2473  | 0.2579  | -0.2414 | -0.0235 |
| 1992 | 0.2473  |         | 0.0807  | -0.0235 |
| 1993 | -0.3633 | -0.7938 | 0.8271  | -0.0235 |
| 1994 | -0.0744 | -0.0987 | -0.0318 | -0.0235 |
| 1995 | -0.5086 | -0.1741 | -0.3378 | -0.0235 |
| 1996 | -0.1423 | -0.0786 | -0.7316 | -0.0235 |
| 1997 | -1.2614 | 0.1381  | 0.5417  | -0.0235 |
| 1998 | -0.4325 | -0.0859 |         | -0.0235 |
| 1999 | -0.3547 | 0.3313  | -0.0159 | -0.0235 |
| 2000 | -0.3092 | 0.3255  | 0.0749  | -0.0235 |
| 2001 | -0.0678 | -0.2132 | -0.1542 | -0.0235 |
| 2002 | 0.2297  |         | 0.0131  | -0.0235 |
| 2003 |         | -0.0395 | 0.2084  | -0.0235 |
| 2004 | 0.1081  | -0.1900 | -0.3109 | -0.0235 |
| 2005 |         | -0.0954 | 0.4619  | -0.0235 |

|        |                                                                                              |             |            |   |   |
|--------|----------------------------------------------------------------------------------------------|-------------|------------|---|---|
| Q8R081 | Heterogeneous nuclear ribonucleoprotein L                                                    | Hnrmpl      | mmu:15388  |   |   |
| Q35134 | DNA-directed RNA polymerase I subunit RPA1                                                   | Polr1a      | mmu:20019  |   |   |
| Q9R1T2 | SUMO-activating enzyme subunit 1;SUMO-activating enzyme subunit 1, N-terminally processed    | Sae1        | mmu:56459  |   |   |
| P35282 | Ras-related protein Rab-21                                                                   | Rab21       | mmu:216344 |   |   |
| Q9D1F4 | Proline-rich AKT1 substrate 1                                                                | Akt1s1      | mmu:67605  |   |   |
| Q8K1X1 | WD repeat-containing protein 11                                                              | Wdr11       | mmu:207425 |   |   |
| P46061 | Ran GTPase-activating protein 1                                                              | Rangap1     | mmu:19387  |   |   |
| Q91K9  | 28S ribosomal protein S34, mitochondrial                                                     | Mrps34      | mmu:79044  |   |   |
| Q9C228 | Vacuolar-sorting protein SNF8                                                                | Snf8        | mmu:27681  |   |   |
| Q92219 | Fatty acyl-CoA reductase 1                                                                   | Far1        | mmu:67420  |   |   |
| Q8C1D8 | Protein IWS1 homolog                                                                         | Iws1        | mmu:73473  |   |   |
| Q88MQ2 | General transcription factor 3C polypeptide 4                                                | Gtf3c4      | mmu:269252 |   |   |
| Q92424 | Ceramide synthase 2                                                                          | Cers3       | mmu:76893  |   |   |
| P60766 | Cell division control protein 42 homolog                                                     | Cdc42       | mmu:12540  |   |   |
| Q88U7  | RUN and FYVE domain-containing protein 1                                                     | Rufy1       | mmu:216724 |   |   |
| P15864 | Histone H1.2                                                                                 | Hist1h1c    | mmu:50708  |   |   |
| Q9ESN6 | Tripartite motif-containing protein 2                                                        | Trim2       | mmu:80890  |   | 1 |
| Q8K3C3 | Protein LZIC                                                                                 | Lzic        | mmu:69151  |   |   |
| Q88VY0 | Ribosomal L1 domain-containing protein 1                                                     | Rsl1d1      | mmu:66409  |   |   |
| Q62261 | Spectrin beta chain, non-erythrocytic 1                                                      | Sptbn1      | mmu:20742  |   |   |
| Q8CG46 | Structural maintenance of chromosomes protein 5                                              | Smc5        | mmu:226026 |   |   |
| Q92315 | U4/U6,U5 tri-snRNP-associated protein 1                                                      | Sart1       | mmu:20227  |   | 1 |
| Q70274 | Protein tyrosine phosphatase type IVA 2                                                      | Ptp4a2      | mmu:19244  |   |   |
| Q00807 | Peroxisomal protein 4                                                                        | Pdx4        | mmu:53381  | 1 |   |
| Q88685 | 26S protease regulatory subunit 6A                                                           | Psmc3       | mmu:19182  |   |   |
| Q88H74 | Nuclear pore complex protein Nup107                                                          | Nup107      | mmu:103468 |   |   |
| Q6P542 | ATP-binding cassette sub-family F member 1                                                   | Abcf1       | mmu:224742 |   |   |
| P35278 | Ras-related protein Rab-5C                                                                   | Rab5c       | mmu:19345  |   |   |
| F8VQC1 | Signal recognition particle subunit SRP72                                                    | Srp72       | mmu:66661  |   |   |
| Q9N9D5 | Protein unc-45 homolog A                                                                     | Unc45a      | mmu:101869 |   |   |
| P61290 | Proteasome activator complex subunit 3                                                       | Psme3       | mmu:19192  |   |   |
| Q3UA37 | Glutamine-rich protein 1                                                                     | Grich1      | mmu:69232  |   |   |
| Q88K12 | Trinucleotide repeat-containing gene 68 protein                                              | Tnrc6b      | mmu:213988 |   |   |
| P26645 | Myristoylated alanine-rich C-kinase substrate                                                | Marcks      | mmu:17118  |   |   |
| Q91K15 | Nuclear RNA helicase 2                                                                       | Ddx21       | mmu:56200  |   |   |
| Q6P7F9 | Nuclear pore complex protein Nup98-Nup96;Nuclear pore complex protein Nup98;Nuclear pore c   | Nup98       | mmu:269966 |   |   |
| Q37WW8 | Serine/arginine-rich splicing factor 6                                                       | Srsf6       | mmu:67996  |   |   |
| Q8VEH8 | Endoplasmic reticulum lectin 1                                                               | Erfec1      | mmu:66753  |   |   |
| P07356 | Annexin A2;Annexin                                                                           | Anxa2       | mmu:12306  |   |   |
| Q327P3 | Glutaminase kidney isoform, mitochondrial                                                    | Gls         | mmu:14660  |   |   |
| Q62393 | Tumor protein D52                                                                            | Tpd52       | mmu:21985  |   |   |
| Q5D7M8 | E3 ubiquitin-protein ligase BRE1A                                                            | Rnf20       | mmu:109331 |   | 1 |
| Q8V136 | Paxillin                                                                                     | Pxn         | mmu:19303  |   |   |
| Q3UMR0 | Ankyrin repeat domain-containing protein 27                                                  | Ankrd27     | mmu:245886 |   |   |
| Q3URD3 | Sarcolemmal membrane-associated protein                                                      | Sinap       | mmu:83997  |   |   |
| Q9D051 | Pyruvate dehydrogenase E1 component subunit beta, mitochondrial                              | Pdhb        | mmu:68263  |   |   |
| Q88K41 | DNA-directed RNA polymerase;DNA-directed RNA polymerase, mitochondrial                       | Polmt       | mmu:216151 |   |   |
| Q9WV43 | Mitotic checkpoint protein BUB3                                                              | Bub3        | mmu:12237  |   |   |
| Q9DCU6 | 39S ribosomal protein L4, mitochondrial                                                      | Mrlp4       | mmu:66163  |   |   |
| Q8QX20 |                                                                                              | Sec24b      | mmu:99683  |   |   |
| Q9W7P7 | GTP-AMP phosphotransferase AK3, mitochondrial                                                | AK3         | mmu:56248  |   |   |
| P50136 | 2-oxoisovalerate dehydrogenase subunit alpha, mitochondrial                                  | Bckdha      | mmu:102182 |   |   |
| Q3U3W5 | Putative protein arginine N-methyltransferase 9                                              | Prrmt10;Prr | mmu:102182 |   |   |
| Q60759 | Glutaryl-CoA dehydrogenase, mitochondrial                                                    | Gcdh        | mmu:270076 |   |   |
| Q8VC30 | Bifunctional ATP-dependent dihydroxyacetone kinase/FAD-AMP lyase (cyclizing);ATP-dependent c | Dak         | mmu:225913 |   |   |
| Q9D1P0 | 39S ribosomal protein L13, mitochondrial                                                     | Mrlp13      | mmu:68537  |   |   |
| Q61187 | Tumor susceptibility gene 101 protein                                                        | Tsg101      | mmu:22088  |   |   |
| P17225 | Poly(pyrimidine) tract-binding protein 1                                                     | Ptpb1       | mmu:67938  |   |   |
| Q81X24 | Splicing factor 45                                                                           | Rbm17       | mmu:76938  |   |   |
| Q9CSV6 | Vesicle transport protein SFT2C                                                              | Sft2d3      | mmu:99683  |   |   |
| Q37W96 | UDP-N-acetylhexosamine pyrophosphorylase-like protein 1                                      | Uap11       | mmu:227620 |   |   |
| P01902 | H-2 class I histocompatibility antigen, K-D alpha chain                                      | H2-K1       | mmu:14155  |   |   |
| Q9ZG20 | Protein fem-1 homolog 8                                                                      | Fem1b       | mmu:14155  | 1 | 1 |
| Q8K019 | Bcl-2-associated transcription factor 1                                                      | Bclaf1      | mmu:72567  |   | 1 |
| P28033 | CCAAT/enhancer-binding protein beta                                                          | Cebpb       | mmu:12608  |   | 1 |
| Q8R3F9 | Speckle targeted PIP5K1A-regulated poly(A) polymerase                                        | Tut1        | mmu:70044  |   |   |
| P25322 | G1/S-specific cyclin-D1                                                                      | Cnd1        | mmu:12443  |   |   |
| Q9N18  | Hepatocyte growth factor-regulated tyrosine kinase substrate                                 | Hgs         | mmu:15239  |   |   |
| P22315 | Ferrochelatase;Ferrochelatase, mitochondrial                                                 | Fech        | mmu:18570  |   |   |
| P12815 | Programmed cell death protein 6                                                              | Pdcd6       | mmu:18570  |   | 1 |
| Q9CPX6 | Ubiquitin-like-conjugating enzyme ATG3                                                       | Atg3        | mmu:67841  |   |   |
| Q9N9N6 | 39S ribosomal protein L1, mitochondrial                                                      | Mrlp1       | mmu:94061  |   |   |
| Q6P9Q4 | FH1/FH2 domain-containing protein 1                                                          | Fhod1       | mmu:234686 |   |   |
| Q08297 | DNA repair protein RAD51 homolog 1                                                           | Rad51       | mmu:19361  |   |   |
| Q9ER15 | Bifunctional arginine demethylase and lysyl-hydroxylase JM1D6                                | Jmjd6       | mmu:107817 |   |   |
| Q92248 | Zinc finger protein AEBP2                                                                    | Aebp2       | mmu:11569  |   |   |
| Q8VC88 | UBX domain-containing protein 4                                                              | Ubxn4       | mmu:67812  |   |   |
| Q91VU7 |                                                                                              | Pus7        | mmu:67693  |   |   |
| Q9CR41 | Huntingtin-interacting protein K                                                             | Hyk         | mmu:67693  |   |   |
| Q8CG72 | Poly(ADP-ribose) glycohydrolase ARH3                                                         | Adprh2      | mmu:100206 | 1 |   |
| P62748 | Hippocalcin-like protein 1                                                                   | Hpcal1      | mmu:53602  |   |   |
| Q88XA1 | Golgi integral membrane protein 4                                                            | Golim4      | mmu:73124  |   |   |
| Q91V58 | FERM, RhoGEF and pleckstrin domain-containing protein 2                                      | Farp2       | mmu:227377 |   |   |
| Q8R502 | Volume-regulated anion channel subunit LRRC8C                                                | Lrrc8c      | mmu:100604 |   |   |
| Q9N102 | PAXIP1-associated glutamate-rich protein 1A                                                  | Pagripa     | mmu:67278  |   |   |
| Q91W18 | Far upstream element-binding protein 1                                                       | Fubp1       | mmu:77987  |   |   |
| Q9P218 | Activating signal cointegrator 1 complex subunit 3                                           | Asc3        | mmu:12385  |   |   |
| P26231 | Catenin alpha-1                                                                              | Ctnna1      | mmu:56357  |   |   |
| Q91H15 | Isovaleryl-CoA dehydrogenase, mitochondrial                                                  | Ahnak2      | mmu:58523  |   |   |
| E9PYB0 |                                                                                              | Elp2        | mmu:68365  |   |   |
| Q91W44 | Elongator complex protein 2                                                                  | Rab14       | mmu:103724 |   |   |
| Q91V41 | Ras-related protein Rab-14                                                                   | Tbcd10a     | mmu:11966  |   |   |
| P58802 | TBC1 domain family member 10A                                                                | Atpgv1b2    | mmu:71853  |   |   |
| P62814 | V-type proton ATPase subunit B, brain isoform                                                | Acin1       | mmu:56215  |   |   |
| Q922R8 | Protein disulfide-isomerase A6                                                               | Tbrg4       | mmu:21379  |   |   |
| Q91JX8 | Apoptotic chromatin condensation inducer in the nucleus                                      | Apbb1ip     | mmu:54519  |   |   |
| Q91YM4 | Protein TBRG4                                                                                | Mtlf2       | mmu:76784  |   |   |
| Q8R5A3 | Amyloid beta A4 precursor protein-binding family 8 member 1-interacting protein              | Nes         | mmu:18008  |   |   |
| Q91V15 | Translation initiation factor IF-2, mitochondrial                                            | Snpd3       | mmu:67335  |   |   |
| Q8P5H2 | Nestin                                                                                       | Gpc4        | mmu:14735  |   |   |
| P62320 | Small nuclear ribonucleoprotein Sm D3                                                        | Rps25       | mmu:28080  |   |   |
| P51655 | Glypican-4;Secreted glypican-4                                                               | Rpl22l1     | mmu:68028  |   |   |
| P62852 | 40S ribosomal protein S25                                                                    | Pdcd2       | mmu:18567  |   |   |
| Q9D020 | ATP synthase subunit O, mitochondrial                                                        | Plrg1       | mmu:53317  |   |   |
| Q9D757 | 60S ribosomal protein L22-like 1                                                             | Sud3        | mmu:71954  |   |   |
| P46718 | Programmed cell death protein 2                                                              | Cdc73       | mmu:214498 |   |   |
| Q922V4 | Pleiotropic regulator 1                                                                      | SmeK1       | mmu:68734  |   |   |
| Q88R65 | Snf3 histone deacetylase corepressor complex component SD33                                  | Pdn6        | mmu:14976  |   |   |
| Q81ZM7 | Parafibromin                                                                                 | Psmc1       | mmu:19179  |   |   |
| Q8P2K6 | Serine/threonine-protein phosphatase 4 regulatory subunit 3A                                 | Ubxn6       | mmu:231389 |   |   |
| Q90958 | Prefoldin subunit 6                                                                          | Rabep1      | mmu:54189  |   |   |
| P62192 | 26S protease regulatory subunit 4                                                            | Smdm2       | mmu:17126  |   |   |
| Q8C7R4 | Ubiquitin-like modifier-activating enzyme 6                                                  | Rpl23       | mmu:65019  |   |   |
| Q35551 | Rab GTPase-binding effector protein 1                                                        | Znhit2      | mmu:29805  |   |   |
| Q62432 | Mothers against decapentaplegic homolog;Mothers against decapentaplegic homolog 2            | Tmem65      | mmu:74868  |   |   |
| P62830 | 60S ribosomal protein L23                                                                    | Obfc1       | mmu:10689  |   |   |
| Q9QY66 | Zinc finger HIT domain-containing protein 2                                                  | Sfrf10      | mmu:14105  |   |   |
| Q4VAE3 | Transmembrane protein 65                                                                     | Plaa        | mmu:18786  |   |   |
| Q8K2X3 | CST complex subunit STN1                                                                     | Klf4d4      | mmu:104112 |   |   |
| Q9R0U0 | Serine/arginine-rich splicing factor 10                                                      | Flnb        | mmu:286940 |   |   |
| P27612 | Phospholipase A-2-activating protein                                                         | Ppfbp1      | mmu:67533  |   |   |
| Q92112 | Kelch domain-containing protein 4                                                            | Akap13      | mmu:75547  |   |   |
| Q91V92 | ATP-citrate synthase                                                                         |             |            |   |   |
| Q8QX90 | Flamin-8                                                                                     |             |            |   |   |
| Q8C8U0 | Liprin-beta-1                                                                                |             |            |   |   |
| E9Q394 |                                                                                              |             |            |   |   |



|      |         |         |           |        |                                                                                                 |                                                                                                  |            |            |   |
|------|---------|---------|-----------|--------|-------------------------------------------------------------------------------------------------|--------------------------------------------------------------------------------------------------|------------|------------|---|
| 2006 | -0.1954 | -1.0182 | 0         | P62880 | Guanine nucleotide-binding protein G(I)/G(S)/G(T) subunit beta-2;Guanine nucleotide-binding pro | Gnb2;Gnb                                                                                         | mmu:14693  |            |   |
| 2007 | -0.0637 | -0.0783 | 0.5879    | 0      | Q81100                                                                                          | Disks large homolog 1                                                                            | Dlg1       | mmu:13383  |   |
| 2008 | 0.0656  | -0.1279 | 0.3060    | 0      | G06A48                                                                                          | Ubiquitin carboxyl-terminal hydrolase;Ubiquitin carboxyl-terminal hydrolase 7                    | Usp7       | mmu:252870 |   |
| 2009 | -0.5768 | 0.3777  | 0.2330    | 0      | A2A151                                                                                          | Endoplasmic reticulum mannosyl-oligosaccharide 1,2-alpha-mannosidase                             | Man1b1     | mmu:227619 |   |
| 2010 | -0.2189 | 0.2495  | -0.2711   | 0      | Q8BH64                                                                                          | EH domain-containing protein 2                                                                   | Ehd2       | mmu:259300 |   |
| 2011 | 0.4065  | 0.4162  | 0.3056    | 0      | Q9D9G5                                                                                          | Perlipin-3                                                                                       | Plin3      | mmu:66905  |   |
| 2012 | -0.1438 | -0.1389 | 0.3723    | 0      | Q9U1V5                                                                                          | Cullin-3                                                                                         | Cul3       | mmu:26554  |   |
| 2013 | 0.1366  | -0.3637 | 0.2558    | 0      | Q8VDU3                                                                                          |                                                                                                  | Apol9a     | mmu:223672 | 1 |
| 2014 | 0.1401  | 0.2260  | -0.4086   | 0      | P43247                                                                                          | DNA mismatch repair protein Msh2                                                                 | Msh2       | mmu:17685  |   |
| 2015 | -0.1834 | 0.0518  | 0.6874    | 0      | P50580                                                                                          | Proliferation-associated protein 2G4                                                             | Pa2g4      | mmu:18813  |   |
| 2016 | -0.1082 | 0.2068  | 0.6864    | 0      | P10126                                                                                          | Elongation factor 1-alpha 1                                                                      | Eef1a1     | mmu:13627  |   |
| 2017 | 0.0917  | -0.1011 | -0.0686   | 0      | Q09K77                                                                                          | Dipeptidyl peptidase 3                                                                           | Dpp3       | mmu:75221  |   |
| 2018 | 0.3039  | -0.5690 | 0.3516    | 0      | Q07113                                                                                          | Cation-independent mannose-6-phosphate receptor                                                  | Igf2r      | mmu:16004  |   |
| 2019 | 0.5478  | -0.5595 | 0.3491    | 0      | Q70481                                                                                          | E3 ubiquitin-protein ligase UBR1                                                                 | Ubr1       | mmu:22222  | 1 |
| 2020 | 0.4565  | -0.3952 | -1.1861   | 0      | Q9J111                                                                                          | Transforming acidic coiled-coil-containing protein 3                                             | Tacc3      | mmu:21853  |   |
| 2021 | -0.0608 | 0.2488  | 0.3160    | 0      | Q9R1X4                                                                                          | Protein timeless homolog                                                                         | Timeless   | mmu:12387  |   |
| 2022 | -0.1945 | -0.2488 | 0.0987    | 0      | Q07248                                                                                          | Catenin beta-1                                                                                   | Ctnnb1     | mmu:17076  |   |
| 2023 | -0.6006 | 0.4553  | -0.4109   | 0      | Q60767                                                                                          | Lymphocyte antigen 75                                                                            | Ly75       | mmu:17700  |   |
| 2024 | 1.1817  | 0.8137  | -0.5884   | 0      | F723U3                                                                                          |                                                                                                  | Raph1      | mmu:77300  |   |
| 2025 | -0.0105 | 0.0719  | -0.7100   | 0      | P59017                                                                                          | Bcl-2-like protein 13                                                                            | Bcl2l13    | mmu:94044  | 1 |
| 2026 | -0.1127 | 0.0000  | -0.0939   | 0      | P52479                                                                                          | Ubiquitin carboxyl-terminal hydrolase 10                                                         | Usp10      | mmu:22224  |   |
| 2027 | -0.0735 | 0.0478  | 0.1651    | 0      | P80314                                                                                          | T-complex protein 1 subunit beta                                                                 | Cct2       | mmu:12461  |   |
| 2028 |         | 0.2443  | 0.2689    | 0      | Q62523                                                                                          | Zyxin                                                                                            | Zyx        | mmu:22793  |   |
| 2029 | 0.1438  | 0.1244  | -0.4355   | 0      | Q3UJ89                                                                                          | Enhancer of mRNA-decapping protein 4                                                             | Edc4       | mmu:234699 |   |
| 2030 | -0.2191 | 0.5814  | -1.2400   | 0      | Q35638                                                                                          | Cohesin subunit SA-2                                                                             | Stag2      | mmu:20843  |   |
| 2031 | -0.5158 | 0.2121  | -0.8615   | 0      | Q8R2Y8                                                                                          | Peptidyl-RNA hydrolase 2, mitochondrial                                                          | Prh2       | mmu:217057 |   |
| 2032 | -0.3764 | 0.2550  | -0.2105   | 0      | Q9CQV5                                                                                          | Microtubule-associated proteins 1A/1B light chain 3B;Microtubule-associated proteins 1A/1B light | Map1lc3b   | mmu:67443  |   |
| 2033 | -1.0506 | 0.2447  | -0.0630   | 0      | Q09020                                                                                          | Heterogeneous nuclear ribonucleoprotein A/B                                                      | Hnnpab     | mmu:15384  |   |
| 2034 | 0.4847  | 0.1979  | -0.1074   | 0      | Q3UJ08                                                                                          | H/ACA ribonucleoprotein complex non-core subunit NAF1                                            | Naf1       | mmu:234344 |   |
| 2035 | 0.1275  | -0.3701 | 0.4459    | 0      | Q8CBW3                                                                                          | Abi interactor 1                                                                                 | Abi1       | mmu:11308  |   |
| 2036 | -0.4779 | 0.3271  |           | 0      | Q8CG48                                                                                          | Structural maintenance of chromosomes protein 2                                                  | Smc2       | mmu:14211  |   |
| 2037 | -0.5053 | 0.1370  | 0.0874    | 0      | P61979                                                                                          | Heterogeneous nuclear ribonucleoprotein K                                                        | Hnnpk      | mmu:15387  |   |
| 2038 | 0.0845  | 0.0847  | -0.1323   | 0      | Q8R8T8                                                                                          | Serine/arginine repetitive matrix protein 2                                                      | Srrm2      | mmu:75956  |   |
| 2039 | -0.2311 | -0.0076 | 0.6184    | 0      | Q78PY7                                                                                          | Staphylococcal nuclease domain-containing protein 1                                              | Snd1       | mmu:56463  |   |
| 2040 | -0.5059 | 0.6023  | -1.1701   | 0      | Q8VCQ8                                                                                          | Dystroglycan;Alpha-dystroglycan;Beta-dystroglycan                                                | Cald1      | mmu:109624 |   |
| 2041 | -1.5806 | 0.5886  | -0.4432   | 0      | Q9U1J8                                                                                          | Squamous cell carcinoma antigen recognized by T-cells 3                                          | Sart3      | mmu:13138  |   |
| 2042 |         | 0.1235  | -0.0740   | 0      | Q9WV55                                                                                          | Vesicle-associated membrane protein-associated protein A                                         | Vapa       | mmu:30960  |   |
| 2043 | 0.8039  | -0.0533 |           | 0      | Q9CQA3                                                                                          | Succinate dehydrogenase [ubiquinone] iron-sulfur subunit, mitochondrial                          | Sdhb       | mmu:67680  |   |
| 2044 | 0.6281  | -0.3360 | 0.5740    | 0      | Q8K273                                                                                          | Membrane magnesium transporter 1                                                                 | Mmg1       | mmu:236792 |   |
| 2045 | 0.0405  | 0.6315  | -0.4653   | 0      | Q8BHG1                                                                                          | Nardilysin                                                                                       | Nrd1       | mmu:230598 |   |
| 2046 | 0.0311  | 0.4429  | -0.8860   | 0      | Q92127                                                                                          | Large neutral amino acids transporter small subunit 1                                            | Slc7a5     | mmu:20539  |   |
| 2047 | -0.6037 | 0.1879  | 0.3170    | 0      | Q9QCD2                                                                                          | Pre-mRNA-splicing factor SFY1                                                                    | Xab2       | mmu:67439  |   |
| 2048 | 0.1192  | 0.0947  |           | 0      | P35951                                                                                          | Low-density lipoprotein receptor                                                                 | Ldlr       | mmu:16835  |   |
| 2049 | -0.3106 | -0.3219 | 0.1968    | 0      | Q68PF6                                                                                          | ARF GTPase-activating protein GIT1                                                               | Glt1       | mmu:216963 |   |
| 2050 | -0.1033 | -0.0386 | 0.1046    | 0      | Q9B9P4                                                                                          | Small acidic protein                                                                             | Smap111c   | mmu:56372  |   |
| 2051 | 0.2751  | -0.1849 | -0.7027   | 0      | Q9D1H7                                                                                          | Golgi to ER traffic protein 4 homolog                                                            | Gtse4      | mmu:67604  |   |
| 2052 | -0.2365 | -0.0484 | -0.3057   | 0      | P58404                                                                                          | Striatin-4                                                                                       | Strn4      | mmu:97387  |   |
| 2053 |         | -0.1037 | -0.4354   | 0      | G5E829                                                                                          | Plasma membrane calcium-transporting ATPase 1                                                    | Atp2b1     | mmu:67972  |   |
| 2054 | 0.3969  | -0.4084 | 0.0836    | 0      | Q8QCE4                                                                                          |                                                                                                  | Parp10     | mmu:671535 |   |
| 2055 |         | -0.0580 | -0.5770   | 0      | P19783                                                                                          | Cytochrome c oxidase subunit 4 isoform 1, mitochondrial                                          | Cox4i1     | mmu:12857  |   |
| 2056 | 0.2833  | -0.0626 | -0.4024   | 0      | P52506                                                                                          | DNA replication licensing factor MCM3                                                            | Mcm3       | mmu:17215  |   |
| 2057 | 0.1284  | -0.5012 | -0.4077   | 0      | P72761                                                                                          | X-ray repair cross-complementing protein 5                                                       | Xrcc5      | mmu:22596  |   |
| 2058 | -0.3393 | -0.1770 | 0.2418    | 0      | Q9OUJ7                                                                                          | Long-chain-fatty-acid-CoA ligase 4                                                               | Acs4       | mmu:50790  |   |
| 2059 | -0.2852 | 0.3414  | -0.2837   | 0      | Q92185                                                                                          | Mitotic spindle assembly checkpoint protein MAD2A                                                | Mad21      | mmu:56150  |   |
| 2060 | -0.0888 | 0.4329  | 0.2532    | 0      | Q56926                                                                                          | Thyroid hormone receptor-associated protein 3                                                    | Thra3      | mmu:230753 |   |
| 2061 | -0.2237 | 0.2076  | -0.1128   | 0      | Q9SLN9                                                                                          | Deoxyhypusine hydroxylase                                                                        | Dhh        | mmu:102115 |   |
| 2062 | -0.4740 | -0.6913 | -0.3033   | 0      | Q8R010                                                                                          | Aminoacyl tRNA synthase complex-interacting multifunctional protein 2                            | Aimp2      | mmu:231872 |   |
| 2063 | -0.3496 | 0.7151  | -0.3747   | 0      | P72603                                                                                          | Raxlin                                                                                           | Rdx        | mmu:19684  |   |
| 2064 |         | 0.1545  | -0.5061   | 0      | Q9D753                                                                                          | Exosome complex component RRP43                                                                  | Exosc8     | mmu:69639  |   |
| 2065 | -0.2419 | -0.1405 | 0.0844    | 0      | Q76M23                                                                                          | Serine/threonine-protein phosphatase 2A 65 kDa regulatory subunit A alpha isoform                | Ppp2r1a    | mmu:51792  | 1 |
| 2066 | 0.2520  | -0.1033 | -1.4852   | 0      | Q61164                                                                                          | Transcriptional repressor CTCF                                                                   | Ctcf       | mmu:13018  |   |
| 2067 | 0.6354  | -0.3612 |           | 0      | Q08739                                                                                          | AMP deaminase 3                                                                                  | Ampd3      | mmu:11717  |   |
| 2068 | 0.0986  | -0.2383 | 0.0421    | 0      | Q9D842                                                                                          | Aprataxin and PNK-like factor                                                                    | Apfl       | mmu:72103  |   |
| 2069 | -0.1909 | 0.2882  | -0.0888   | 0      | E9Q616                                                                                          |                                                                                                  | Ahnk       |            |   |
| 2070 | 0.0693  | 0.2266  | 0.3556    | 0      | Q55143                                                                                          | Sarcoplasmic/endoplasmic reticulum calcium ATPase 2                                              | Atp2a2     | mmu:11938  | 1 |
| 2071 | -0.3247 | 0.2076  | -0.4238   | 0      | Q9CPW4                                                                                          | Actin-related protein 2/3 complex subunit 5                                                      | Arcp5      | mmu:67771  |   |
| 2072 | -0.1713 | -0.0864 | -0.1468   | 0      | A2R543                                                                                          |                                                                                                  | Pcdh7      |            |   |
| 2073 | -0.2969 | 0.6443  | 0.3815    | 0      | P05064                                                                                          | Fructose-bisphosphate aldolase A;Fructose-bisphosphate aldolase                                  | Aldoa;Aldc | mmu:11674  |   |
| 2074 | -0.1386 | 0.5128  | 0.1555    | 0      | Q9CZU6                                                                                          | Citrate synthase, mitochondrial                                                                  | Cs         | mmu:12974  |   |
| 2075 | -0.1273 | 0.2337  | -0.3265   | 0      | Q9Q206                                                                                          | Toll-interacting protein                                                                         | Tollip     | mmu:54473  |   |
| 2076 | 1.1243  | 0.8860  | 0.8952    | 0      | Q62Q03                                                                                          | Formin-binding protein 4                                                                         | Fbnp4      | mmu:55935  |   |
| 2077 | 0.6324  | 0.9252  | 0.3188    | 0      | Q91YD3                                                                                          | mRNA-decapping enzyme 1A                                                                         | Dcp1a      | mmu:75901  |   |
| 2078 | -0.3215 |         | -0.9065   | 0      | P47740                                                                                          | Aldehyde dehydrogenase;Fatty aldehyde dehydrogenase                                              | Aldh3a2    | mmu:11671  |   |
| 2079 | -0.5681 | 0.7256  | -0.1206   | 0      | Q8VH51                                                                                          | RNA-binding protein 39                                                                           | Rbm39      | mmu:170791 |   |
| 2080 | -0.0716 | -0.0994 |           | 0      | Q88947                                                                                          | Asparagine-tRNA ligase, cytoplasmic                                                              | Nars       | mmu:70223  |   |
| 2081 | -0.1505 | 0.1632  |           | 0      | Q8Q554                                                                                          | Splicing factor 3A subunit 3                                                                     | Sf3a3      | mmu:75662  |   |
| 2082 | -0.4436 | -0.0400 | 0.3523    | 0      | Q92ZU0                                                                                          | Proteasome subunit alpha type-7;Proteasome subunit alpha type-7-like                             | Psmg7;Psn  | mmu:26444  |   |
| 2083 | -1.0410 | 0.6924  | -0.5346   | 0      | Q8R9H7                                                                                          | TBC1 domain family member 17                                                                     | Tbc1d17    | mmu:233204 |   |
| 2084 | 0.5788  | 0.2085  | -0.2046   | 0      | Q61127                                                                                          | NGF1-A-binding protein 2                                                                         | Nab2       | mmu:17937  |   |
| 2085 | -0.7237 | 0.6248  | -0.1199   | 0      | Q3TNP1                                                                                          |                                                                                                  | Gtf3c3     | mmu:98488  |   |
| 2086 | 0.6363  | -0.2878 | 0.2518    | 0      | Q6NV83                                                                                          | U2 snRNP-associated SURP motif-containing protein                                                | U2surp     | mmu:67958  |   |
| 2087 | 0.3009  | -0.5657 | 0.2570    | 0      | Q9QZF2                                                                                          | Glypican-1;Secreted glypican-1                                                                   | Gpc1       | mmu:14733  |   |
| 2088 | -0.0118 | 0.1487  | 0.3570    | 0      | Q8KH26                                                                                          | ATP-binding cassette sub-family F member 3                                                       | Abcf3      | mmu:27406  |   |
| 2089 | 0.1155  | -0.2241 |           | 0      | Q8BLV3                                                                                          | Gephyrin;Molybdopterin adenylyltransferase;Molybdopterin molybdenumtransferase                   | Gphn       | mmu:268566 |   |
| 2090 | -0.2458 | 0.1096  | -0.7792   | 0      | Q9CQF0                                                                                          | 39S ribosomal protein L11, mitochondrial                                                         | Mrlp11     | mmu:66419  |   |
| 2091 | -0.3036 |         | -0.2760   | 0      | Q9NRP6                                                                                          | Pre-mRNA-processing factor 19                                                                    | Ppaf19     | mmu:28000  |   |
| 2092 | -0.1040 | -0.2058 | -0.2975   | 0      | P97390                                                                                          | Vacuolar protein sorting-associated protein 45                                                   | Vps45      | mmu:22365  | 1 |
| 2093 | 0.5414  | -0.1240 | -0.0676   | 0      | Q92ZT5                                                                                          | Band 4.1-like protein 1                                                                          | Epb41l1;E4 | mmu:13821  |   |
| 2094 | -0.0505 | 0.1643  | 0.5088    | 0      | Q9CX99                                                                                          | CUE domain-containing protein 2                                                                  | Cuedc2     | mmu:67116  |   |
| 2095 | 0.2938  | -0.9655 | 0.2995    | 0      | Q8K2M0                                                                                          | 39S ribosomal protein L38, mitochondrial                                                         | Mrlp38     | mmu:60441  |   |
| 2096 | 0.3790  | 0.1165  | -0.2086   | 0      | Q9EQK5                                                                                          | Major vault protein                                                                              | Mvp        |            |   |
| 2097 | -0.1845 | 0.1260  | -0.0983   | 0      | Q8C0L0                                                                                          | Thioredoxin-related transmembrane protein 4                                                      | Tmx4       | mmu:52837  |   |
| 2098 | -0.4889 | 0.1204  |           | 0      | Q3TZZ7                                                                                          | Extended synaptotagmin-2                                                                         | Eys2       | mmu:52635  |   |
| 2099 | 0.0806  | 0.0834  | -0.1970   | 0      | Q99M86                                                                                          | Serrate RNA effector molecule homolog                                                            | Srrt       | mmu:83701  |   |
| 2100 | -0.1527 | 0.2775  | 0.6244    | 0      | Q9EPJ9                                                                                          | ADP-ribosylation factor GTPase-activating protein 1                                              | Arfgap1    | mmu:228998 |   |
| 2101 | -0.0918 | -0.0668 |           | 0      | F70B83                                                                                          |                                                                                                  | Ahnk2      |            |   |
| 2102 | 0.1220  | -0.5066 | -0.6773   | 0      | Q3UJ89                                                                                          | WASH complex subunit 7                                                                           | Kiaa1033   | mmu:319277 |   |
| 2103 | 0.3565  | -0.0552 | 0.4085    | 0      | Q9ER72                                                                                          | Cysteine-tRNA ligase, cytoplasmic                                                                | Cars       | mmu:27267  |   |
| 2104 | -0.1029 | 0.3786  | 0.3106    | 0      | P59999                                                                                          | Actin-related protein 2/3 complex subunit 4                                                      | Arcp4      | mmu:68089  |   |
| 2105 | -0.4244 | 0.1377  | 0.3566    | 0      | Q8K310                                                                                          | Matrin-3                                                                                         | Matr3      | mmu:17184  |   |
| 2106 | 0.2118  | 0.1981  | -0.3338   | 0      | Q8K4Z5                                                                                          | Splicing factor 3A subunit 1                                                                     | Sf3a1      | mmu:67465  |   |
| 2107 | -0.3923 | 1.1613  | 0.6015    | 0      | P54726                                                                                          | UV excision repair protein RAD23 homolog A                                                       | Rad23a     | mmu:19358  |   |
| 2108 | -0.0975 | -0.0000 | -0.1517   | 0      | Q92T11                                                                                          | AP-3 complex subunit beta-1                                                                      | Ap3b1      | mmu:11774  |   |
| 2109 | -0.0706 | -1.0095 | -0.4964   | 0      | Q9QKE7                                                                                          | F-box-like/WD repeat-containing protein TBL1X                                                    | Tbl1x      | mmu:21372  |   |
| 2110 | 0.1639  | -0.4226 | -0.0782   | 0      | Q96R25                                                                                          | Protein strawberry notch homolog 1                                                               | Sbn1       | mmu:59025  |   |
| 2111 | -0.2238 | -0.1678 | -1.4527   | 0      | Q61735                                                                                          | Leukocyte surface antigen CD47                                                                   | Cd47       | mmu:16423  |   |
| 2112 | -0.0536 | 0.6347  | 0.6303    | 0      | Q35639                                                                                          | Annexin A3;Annexin                                                                               | Anxa3      | mmu:11745  |   |
| 2113 | -0.1318 | 0.3066  | -0.1849   | 0      | Q8OTP3                                                                                          | E3 ubiquitin-protein ligase UBR5                                                                 | Ubr5       | mmu:70790  |   |
| 2114 | -0.0111 | 0.6606  | -0.5204   | 0      | S4R1W5                                                                                          |                                                                                                  | Rbm6       | mmu:19654  | 1 |
| 2115 | -0.4368 | 0.4116  | 0.0579    | 0      | Q99M28                                                                                          | RNA-binding protein with serine-rich domain 1                                                    | Rnps1      | mmu:19826  |   |
| 2116 | -0.2479 | -0.6891 | 0.1022    | 0      | P31230                                                                                          | Aminoacyl tRNA synthase complex-interacting multifunctional protein 1;Endothelial monocyte-act   | Aimp1      | mmu:14688  |   |
| 2117 | 0.2847  | -0.4677 | -0.0695   | 0      | P62874                                                                                          | Guanine nucleotide-binding protein G(I)/G(S)/G(T) subunit beta-1                                 | Gnb1;Gnb   | mmu:14688  |   |
| 2118 | -0.4807 | -0.2555 | 0.3655    | 0      | Q9CX56                                                                                          | 26S proteasome non-ATPase regulatory subunit 8                                                   | Psm8       | mmu:57296  |   |
| 2119 |         | -0.3445 | -0.1419   | 0      | Q3UJX4                                                                                          |                                                                                                  | Srsf11     | mmu:69207  |   |
| 2120 | -0.5687 | -0.1576 | -0.0888   | 0      | Q9VJUM4                                                                                         | Coronin-1C                                                                                       | Coro1c     | mmu:23790  |   |
| 2121 | -0.0688 | 0.2106  | 0.3718    | 0      | P70152                                                                                          | Vimentin                                                                                         | Vim        | mmu:22352  |   |
| 2122 | -0.1643 | -0.2228 | 0.1676    | 0      | P48036                                                                                          | Annexin A5                                                                                       | Anxa5      | mmu:11747  |   |
| 2123 | -0.2110 | -1.0570 | 0.2801    | 0      | Q9EPK6                                                                                          | Nucleotide exchange factor SIL1                                                                  | Sil1       | mmu:81500  |   |
| 2124 | -0.5635 | 0.4688  | 0.2911    | 0      | P52480                                                                                          | Pyruvate kinase PKM                                                                              | Pkm        | mmu:18746  |   |
| 2125 | 0.1811  | -0.2751 | 0.0951    | 0      | P80313                                                                                          | T-complex protein 1 subunit eta                                                                  | Cct7       | mmu:12468  |   |
| 2126 | -0.5810 | -0.1381 | 0.3687    | 0      | Q9ER38                                                                                          | Torsin-3A                                                                                        | Tor3a      | mmu:30935  |   |
| 2127 | -0.0000 | -0.1804 | -0.2840</ |        |                                                                                                 |                                                                                                  |            |            |   |

|      |         |         |         |         |
|------|---------|---------|---------|---------|
| 2132 | -0.0726 | -0.0726 | -0.0483 | -0.0201 |
| 2133 | -0.6585 | -0.0846 | -0.5750 | -0.0390 |
| 2134 | -0.2111 | -0.9355 | -0.4374 | -0.0390 |
| 2135 | -0.4404 | -0.0996 | -0.5589 | -0.0390 |
| 2136 | -0.1241 | -0.1114 | -0.0887 | -0.0488 |
| 2137 | -0.0000 | -0.0000 | -0.1763 | -0.0488 |
| 2138 | -0.1494 | -0.1374 | -0.2301 | -0.0488 |
| 2139 | -0.2161 | -0.2288 | -0.3366 | -0.0426 |
| 2140 | -0.0000 | -0.0000 | -0.3119 | -0.0426 |
| 2141 | -0.1534 | -0.8186 | -0.2111 | -0.0426 |
| 2142 | -0.0000 | -0.1042 | -0.3676 | -0.0426 |
| 2143 | -0.0556 | -0.2762 | -0.0863 | -0.0426 |
| 2144 | -0.0000 | -0.3893 | -0.1857 | -0.0426 |
| 2145 | -0.4735 | -0.5475 | -0.2927 | -0.0426 |
| 2146 | -0.3205 | -0.1734 | -0.1419 | -0.0426 |
| 2147 | -0.0681 | -0.0000 | -0.4219 | -0.0426 |
| 2148 | -0.5061 | -0.3561 | -0.4309 | -0.0426 |
| 2149 | -0.0000 | -0.6833 | -0.2075 | -0.0426 |
| 2150 | -0.3704 | -0.2659 | -0.3556 | -0.0426 |
| 2151 | -0.5334 | -0.9010 | -0.3077 | -0.0426 |
| 2152 | -0.7001 | -0.0000 | -0.1168 | -0.0426 |
| 2153 | -0.5720 | -0.7333 | -0.4252 | -0.0426 |
| 2154 | -0.1227 | -0.2110 | -0.7592 | -0.0426 |
| 2155 | -0.2278 | -0.0000 | -0.0000 | -0.0426 |
| 2156 | -0.2606 | -0.3472 | -0.6706 | -0.0426 |
| 2157 | -0.4465 | -0.8038 | -0.1507 | -0.0426 |
| 2158 | -0.0000 | -0.3119 | -0.0688 | -0.0426 |
| 2159 | -0.0579 | -0.2022 | -0.1362 | -0.0426 |
| 2160 | -0.9073 | -0.1538 | -0.3695 | -0.0426 |
| 2161 | -0.6464 | -0.3045 | -0.3670 | -0.0426 |
| 2162 | -0.4139 | -0.2128 | -0.0426 | -0.0426 |
| 2163 | -0.1924 | -0.1909 | -0.2456 | -0.0426 |
| 2164 | -0.0000 | -0.0941 | -0.0427 | -0.0426 |
| 2165 | -0.6333 | -0.0000 | -0.0000 | -0.0426 |
| 2166 | -0.0000 | -0.1275 | -0.4524 | -0.0426 |
| 2167 | -0.4139 | -0.0000 | -0.3376 | -0.0426 |
| 2168 | -0.3865 | -0.7333 | -0.0000 | -0.0426 |
| 2169 | -0.1929 | -0.9174 | -0.5207 | -0.0426 |
| 2170 | -0.0000 | -0.1139 | -0.0641 | -0.0426 |
| 2171 | -0.5714 | -0.3726 | -0.4222 | -0.0426 |
| 2172 | -0.2687 | -0.1203 | -0.1961 | -0.0426 |
| 2173 | -0.0661 | -0.3025 | -0.0426 | -0.0426 |
| 2174 | -0.3034 | -0.2715 | -0.7795 | -0.0426 |
| 2175 | -0.2116 | -0.2848 | -0.0896 | -0.0426 |
| 2176 | -0.1397 | -0.3027 | -0.0000 | -0.0426 |
| 2177 | -0.1511 | -0.3200 | -0.0426 | -0.0426 |
| 2178 | -0.2411 | -0.3038 | -0.0641 | -0.0426 |
| 2179 | -0.1269 | -0.3870 | -0.1034 | -0.0426 |
| 2180 | -0.5448 | -0.0000 | -0.2396 | -0.0426 |
| 2181 | -0.2352 | -0.1533 | -0.4015 | -0.0426 |
| 2182 | -0.1231 | -0.5456 | -0.9101 | -0.0426 |
| 2183 | -0.1880 | -0.1265 | -0.2203 | -0.0426 |
| 2184 | -0.3291 | -0.1971 | -0.3368 | -0.0426 |
| 2185 | -0.1062 | -0.3544 | -0.3560 | -0.0426 |
| 2186 | -0.5134 | -0.4181 | -0.6167 | -0.0426 |
| 2187 | -0.2740 | -0.4344 | -0.3287 | -0.0426 |
| 2188 | -0.1596 | -0.3070 | -0.1707 | -0.0426 |
| 2189 | -0.3581 | -0.0000 | -0.0000 | -0.0426 |
| 2190 | -0.1537 | -0.2216 | -0.3946 | -0.0426 |
| 2191 | -0.7323 | -0.0881 | -0.7159 | -0.0426 |
| 2192 | -1.1387 | -0.3613 | -0.6942 | -0.0426 |
| 2193 | -0.2692 | -0.0643 | -0.6759 | -0.0426 |
| 2194 | -0.1167 | -0.3196 | -0.0627 | -0.0426 |
| 2195 | -0.4138 | -0.1295 | -1.1174 | -0.0426 |
| 2196 | -0.1424 | -0.0831 | -0.0630 | -0.0426 |
| 2197 | -0.2812 | -1.1119 | -0.6709 | -0.0426 |
| 2198 | -0.2130 | -0.4327 | -0.0000 | -0.0426 |
| 2199 | -0.0000 | -1.2446 | -0.0000 | -0.0426 |
| 2200 | -0.4584 | -0.1431 | -0.5453 | -0.0426 |
| 2201 | -0.3194 | -0.2964 | -0.2375 | -0.0426 |
| 2202 | -0.1534 | -0.6236 | -0.3556 | -0.0426 |
| 2203 | -0.1405 | -0.1874 | -0.2236 | -0.0426 |
| 2204 | -0.3112 | -0.1213 | -0.2370 | -0.0426 |
| 2205 | -0.0998 | -0.6817 | -0.2872 | -0.0426 |
| 2206 | -0.4095 | -0.5161 | -0.2611 | -0.0426 |
| 2207 | -0.1847 | -0.0000 | -0.3025 | -0.0426 |
| 2208 | -0.1804 | -0.5358 | -0.6963 | -0.0426 |
| 2209 | -0.1664 | -0.5398 | -0.4462 | -0.0426 |
| 2210 | -0.3873 | -0.1271 | -0.2996 | -0.0426 |
| 2211 | -0.1277 | -0.5804 | -0.8001 | -0.0426 |
| 2212 | -0.3399 | -0.2474 | -0.1319 | -0.0426 |
| 2213 | -0.2087 | -1.5263 | -0.7976 | -0.0426 |
| 2214 | -0.8232 | -0.0663 | -0.0780 | -0.0426 |
| 2215 | -0.0000 | -0.0000 | -0.1091 | -0.0426 |
| 2216 | -0.8814 | -0.0786 | -0.2884 | -0.0426 |
| 2217 | -0.0898 | -0.3512 | -0.5186 | -0.0426 |
| 2218 | -0.9846 | -0.1679 | -0.6326 | -0.0426 |
| 2219 | -0.0636 | -0.0931 | -0.0000 | -0.0426 |
| 2220 | -1.2150 | -0.2804 | -0.0000 | -0.0426 |
| 2221 | -0.1006 | -0.0000 | -0.3993 | -0.0426 |
| 2222 | -0.1324 | -0.4125 | -0.4961 | -0.0426 |
| 2223 | -0.5115 | -0.3380 | -0.1511 | -0.0426 |
| 2224 | -0.4485 | -0.5168 | -0.4677 | -0.0426 |
| 2225 | -0.3587 | -0.5340 | -0.5384 | -0.0426 |
| 2226 | -0.1403 | -0.2711 | -0.1881 | -0.0426 |
| 2227 | -0.6417 | -0.0786 | -0.4914 | -0.0426 |
| 2228 | -0.0734 | -0.0000 | -0.5135 | -0.0426 |
| 2229 | -0.5357 | -0.6588 | -0.1553 | -0.0426 |
| 2230 | -0.9586 | -0.3335 | -0.1138 | -0.0426 |
| 2231 | -0.1669 | -0.9243 | -0.9548 | -0.0426 |
| 2232 | -0.2873 | -0.1383 | -0.1990 | -0.0426 |
| 2233 | -0.0000 | -0.4435 | -0.2970 | -0.0426 |
| 2234 | -0.5028 | -0.1631 | -0.1515 | -0.0426 |
| 2235 | -0.4006 | -0.3370 | -0.0791 | -0.0426 |
| 2236 | -0.2992 | -0.0888 | -0.2315 | -0.0426 |
| 2237 | -0.4781 | -0.1398 | -0.6887 | -0.0426 |
| 2238 | -0.0000 | -0.1168 | -0.1278 | -0.0426 |
| 2239 | -0.4325 | -0.1280 | -0.4536 | -0.0426 |
| 2240 | -0.3805 | -0.2882 | -0.0000 | -0.0426 |
| 2241 | -0.0000 | -0.2544 | -0.0000 | -0.0426 |
| 2242 | -0.0890 | -0.1049 | -0.5020 | -0.0426 |
| 2243 | -0.0543 | -0.4229 | -0.1106 | -0.0426 |
| 2244 | -1.2576 | -1.2182 | -0.4501 | -0.0426 |
| 2245 | -0.0988 | -0.4868 | -1.1603 | -0.0426 |
| 2246 | -0.6780 | -0.3857 | -0.1347 | -0.0426 |
| 2247 | -0.5114 | -0.7353 | -0.2619 | -0.0426 |
| 2248 | -0.0000 | -0.0000 | -0.9121 | -0.0426 |
| 2249 | -0.0000 | -0.3229 | -0.1861 | -0.0426 |
| 2250 | -0.3536 | -0.6190 | -0.3662 | -0.0426 |
| 2251 | -0.0653 | -0.8648 | -0.4798 | -0.0426 |
| 2252 | -0.1949 | -0.1371 | -0.0872 | -0.0426 |
| 2253 | -0.4966 | -0.5660 | -0.2486 | -0.0426 |
| 2254 | -0.0439 | -0.6073 | -0.2802 | -0.0426 |
| 2255 | -0.0000 | -0.3984 | -0.2435 | -0.0426 |
| 2256 | -0.0000 | -0.6086 | -1.1843 | -0.0426 |
| 2257 | -0.4880 | -0.0000 | -0.4910 | -0.0426 |

|   |        |                                                                                                      |
|---|--------|------------------------------------------------------------------------------------------------------|
| 0 | Q61074 | Protein phosphatase 1G                                                                               |
| 0 | Q64521 | Glycerol-3-phosphate dehydrogenase;Glycerol-3-phosphate dehydrogenase, mitochondrial                 |
| 0 | Q9CQC6 | Basic leucine zipper and W2 domain-containing protein 1                                              |
| 0 | Q80Z2W | Protein THEM6                                                                                        |
| 0 | Q02819 | Nucleobindin-1                                                                                       |
| 0 | Q8C156 | Condensin complex subunit 2                                                                          |
| 0 | P61234 | 26S protease regulatory subunit 10B                                                                  |
| 0 | Q9DC29 | ATP-binding cassette sub-family B member 6, mitochondrial                                            |
| 0 | Q9CQW9 | Interferon-induced transmembrane protein 3                                                           |
| 0 | Q77PM1 | Protein PRRC2B                                                                                       |
| 0 | Q8CHW4 | Translation initiation factor eIF-2B subunit epsilon                                                 |
| 0 | E70318 | Band 4,1-like protein 2                                                                              |
| 0 | G5E8V9 |                                                                                                      |
| 0 | Q9CSU0 | Regulation of nuclear pre-mRNA domain-containing protein 1B                                          |
| 0 | Q8C1C7 | DNA-directed RNA polymerase II subunit RPB2                                                          |
| 0 | Q8C1C7 | Bi-functional glutamate/proline-tRNA ligase;Glutamate-tRNA ligase;Proline-tRNA ligase                |
| 0 | Q8BGE5 | Cysteine protease ATG4B                                                                              |
| 0 | Q9IIV4 | Probable ATP-dependent RNA helicase DDX20                                                            |
| 0 | P63094 | Guanine nucleotide-binding protein G(s) subunit alpha isoforms XLas;Guanine nucleotide-binding       |
| 0 | P70372 | ELAV-like protein 1                                                                                  |
| 0 | Q90BG6 | Dolichyl-diphosphooligosaccharide-protein glycosyltransferase subunit 2                              |
| 0 | Q54916 | RaBP1-associated Eps domain-containing protein 1                                                     |
| 0 | Q99NH2 | Partitioning defective 3 homolog                                                                     |
| 0 | Q9D125 | 28S ribosomal protein S25, mitochondrial                                                             |
| 0 | Q8K021 | Secretory carrier-associated membrane protein 1                                                      |
| 0 | P05627 | Transcription factor AP-1                                                                            |
| 0 | P62034 | Cytosolin-2                                                                                          |
| 0 | R0R0C5 | CAD protein;Glutamine-dependent carbamoyl-phosphate synthase;Aspartate carbamoyltransferas           |
| 0 | Q91VX2 | Ubiquitin-associated protein 2                                                                       |
| 0 | Q92160 | Conserved oligomeric Golgi complex subunit 1                                                         |
| 0 | E9Q226 |                                                                                                      |
| 0 | Q991F8 | PC4 and SFRS1-interacting protein                                                                    |
| 0 | P52293 | Importin subunit alpha-1                                                                             |
| 0 | Q8VCE2 | GPN-loop GTPase 1                                                                                    |
| 0 | Q8B8Z5 | tRNA-splicing endonuclease subunit Sen34                                                             |
| 0 | Q35572 | 39S ribosomal protein L23, mitochondrial                                                             |
| 0 | Q9D1M7 | Peptidyl-prolyl cis-trans isomerase FKBP11                                                           |
| 0 | Q3T193 | HLCS1-binding protein 3                                                                              |
| 0 | Q9QY66 | Golgin subfamily A member 5                                                                          |
| 0 | Q8B7T2 | Cleavage and polyadenylation specificity factor subunit 7                                            |
| 0 | B9E186 | Oxysterol-binding protein                                                                            |
| 0 | Q8B967 | ATP-dependent zinc metalloprotease YME1L1                                                            |
| 0 | P14873 | Microtubule-associated protein 18;MAP1B heavy chain;MAP1 light chain LC1                             |
| 0 | P48678 | Prelamin-A/C;Lamin-A/C                                                                               |
| 0 | Q81D47 | ATP-dependent RNA helicase DDX42                                                                     |
| 0 | P35279 | Ras-related protein Rab-6A                                                                           |
| 0 | P73116 | Eukaryotic translation initiation factor 3 subunit A                                                 |
| 0 | P60710 | Actin, cytoplasmic 1;Actin, cytoplasmic 1, N-terminally processed                                    |
| 0 | Q5SW09 | Pre-RNA-processing protein TSR1 homolog                                                              |
| 0 | Q08810 | 116 kDa U5 small nuclear ribonucleoprotein component                                                 |
| 0 | R2RQ71 |                                                                                                      |
| 0 | Q8BU30 | Isoleucine-tRNA ligase, cytoplasmic                                                                  |
| 0 | P14576 | Signal recognition particle 54 kDa protein                                                           |
| 0 | Q99M08 | Uncharacterized protein C4orf3 homolog                                                               |
| 0 | Q8B958 | Glucosamine-6-phosphate isomerase 1                                                                  |
| 0 | A6H619 | PHD and RING finger domain-containing protein 1                                                      |
| 0 | Q9R3X4 | Eukaryotic translation initiation factor 3 subunit M                                                 |
| 0 | Q8R271 | Craniofacial development protein 1                                                                   |
| 0 | Q8R311 | CTAGE family member 5;Melanoma inhibitory activity protein 2                                         |
| 0 | Q9R1Q9 | V-type proton ATPase subunit S1                                                                      |
| 0 | P53026 | Ribosomal protein;60S ribosomal protein L10a                                                         |
| 0 | Q8CFCT | CLK4-associated serine/arginine rich protein                                                         |
| 0 | Q9D2G2 | Dihydrolypolysine-residue succinyltransferase component of 2-oxoglutarate dehydrogenase com          |
| 0 | Q8OUU7 | Mannosyl-oligosaccharide glucosidase                                                                 |
| 0 | P11983 | T-complex protein 1 subunit alpha                                                                    |
| 0 | Q6B9H9 | Membrane-associated guanylate kinase, WW and PDZ domain-containing protein 1                         |
| 0 | Q01320 | DNA topoisomerase 2-alpha                                                                            |
| 0 | Q9Q512 |                                                                                                      |
| 0 | Q924K8 | Metastasis-associated protein MTA3                                                                   |
| 0 | Q9CQJ4 | E3 ubiquitin-protein ligase RING2                                                                    |
| 0 | P70671 | Interferon regulatory factor 3                                                                       |
| 0 | Q91YQ5 | Dolichyl-diphosphooligosaccharide-protein glycosyltransferase subunit 1                              |
| 0 | Q62167 | ATP-dependent RNA helicase DDX3X;Putative ATP-dependent RNA helicase P110                            |
| 0 | Q61550 | Double-strand-break repair protein rad21 homolog                                                     |
| 0 | P78037 | T-complex protein 1 subunit zeta                                                                     |
| 0 | Q8B929 | Pyruvate dehydrogenase protein X component, mitochondrial                                            |
| 0 | Q8B0C7 | Anaphase-promoting complex subunit 2                                                                 |
| 0 | Q6C011 | Podoplanin                                                                                           |
| 0 | Q8K3H0 | DCC-interacting protein 13-alpha                                                                     |
| 0 | Q921M3 | Splicing factor 3B subunit 3                                                                         |
| 0 | Q61753 | D-3-phosphoglycerate dehydrogenase                                                                   |
| 0 | Q8CH02 | SURP and G-patch domain-containing protein 1                                                         |
| 0 | Q3UJCL | Tax1-binding protein 1 homolog                                                                       |
| 0 | Q6P4T2 | U5 small nuclear ribonucleoprotein 200 kDa helicase                                                  |
| 0 | Q92289 | Sperm-specific antigen 2 homolog                                                                     |
| 0 | P63154 | Crooked neck-like protein 1                                                                          |
| 0 | Q09005 | Sphingolipid delta(4)-desaturase DES1                                                                |
| 0 | Q9IIV4 | Cytoplasmic dynein 1 heavy chain 1                                                                   |
| 0 | Q99186 | Methionine adenosyltransferase 2 subunit beta                                                        |
| 0 | Q8CG47 | Structural maintenance of chromosomes protein;Structural maintenance of chromosomes                  |
| 0 | Q8C1J3 | E3 UFM1-protein ligase 1                                                                             |
| 0 | Q555Z5 | Tensin-3                                                                                             |
| 0 | P06151 | L-lactate dehydrogenase;L-lactate dehydrogenase A chain                                              |
| 0 | Q9CQ79 | Thioredoxin domain-containing protein 9                                                              |
| 0 | Q8K224 | Condensin complex subunit 1                                                                          |
| 0 | Q8B9V7 | COP9 signalosome complex subunit 8                                                                   |
| 0 | Q8B0C7 | Prostaglandin H synthase 3                                                                           |
| 0 | Q99K48 | Non-POU domain-containing octamer-binding protein                                                    |
| 0 | Q9CX34 | Suppressor of G2 allele of SKP1 homolog                                                              |
| 0 | Q9DBX2 | Phosducin-like protein                                                                               |
| 0 | Q8R570 | Synaptosomal-associated protein 47                                                                   |
| 0 | P51943 | Cyclin-A2                                                                                            |
| 0 | Q3UJ29 | Leucine-rich repeat flightless-interacting protein 1                                                 |
| 0 | Q8B447 | Kinesin light chain 1                                                                                |
| 0 | G3X922 |                                                                                                      |
| 0 | P70333 | Heterogeneous nuclear ribonucleoprotein H2                                                           |
| 0 | Q9D0X1 | Apoptosis-inducing factor 1, mitochondrial                                                           |
| 0 | P52825 | Carnitine O-palmitoyltransferase 2, mitochondrial                                                    |
| 0 | Q91W50 | CDGSH iron-sulfur domain-containing protein 1                                                        |
| 0 | Q9R0E1 | Procollagen-lysine,2-oxoglutarate 5-dioxygenase 3                                                    |
| 0 | Q62419 | Endophilin-A2                                                                                        |
| 0 | Q58A65 | C-Jun-amino-terminal kinase-interacting protein 4                                                    |
| 0 | Q3UHU5 | Microtubule cross-linking factor 1                                                                   |
| 0 | Q5U3K5 | Rab-like protein 6                                                                                   |
| 0 | P97304 | DNA-directed RNA polymerases I and III subunit RPAC2                                                 |
| 0 | Q91W50 | Cold shock domain-containing protein E1                                                              |
| 0 | Q9Q411 |                                                                                                      |
| 0 | Q8C079 | Striatin-interacting protein 1                                                                       |
| 0 | Q8VC70 | RNA-binding motif, single-stranded-interacting protein 2                                             |
| 0 | Q8B8W0 | Ubiquitin carboxyl-terminal hydrolase 38                                                             |
| 0 | Q55201 | Transcription elongation factor SPT5                                                                 |
| 0 | P42232 | Signal transducer and activator of transcription 5B;Signal transducer and activator of transcription |
| 0 | Q8VE47 | Ubiquitin-like modifier-activating enzyme 5                                                          |
| 0 | P49718 | DNA helicase;DNA replication licensing factor MCM5                                                   |
| 0 | Q55166 | Golgi SNAP receptor complex member 2                                                                 |
| 0 | Q61425 | Hydroxacyl-coenzyme A dehydrogenase, mitochondrial                                                   |

|        |            |
|--------|------------|
| Ppm1g  | mmu:14208  |
| Gpd2   | mmu:14571  |
| Bzw1   | mmu:66882  |
| Them6  | mmu:223626 |
| Nucb1  | mmu:18220  |
| NcapH  | mmu:215387 |
| Psmc5  | mmu:67089  |
| Abcb6  | mmu:74104  |
| Ifitm3 | mmu:66141  |
| Prrc2b | mmu:227723 |
| Eif2b5 | mmu:224045 |
| Epb412 | mmu:13822  |
| Arfp1  | mmu:99889  |
| Rprdb1 | mmu:70470  |
| Polr2b | mmu:231329 |
| Epr5   | mmu:107508 |
| Atg4b  | mmu:66615  |
| Ddx20  | mmu:53975  |
| Gnas   | mmu:14683  |
| Elavl1 | mmu:15568  |
| Rpn2   | mmu:20014  |
| Reps1  | mmu:19707  |
| Pard3  | mmu:937    |

|      |         |         |         |        |
|------|---------|---------|---------|--------|
| 2258 | 0.2561  | -0.1218 | -0.1094 | 0.0897 |
| 2259 | 0.8135  | 0.1092  | -0.3361 | 0.0904 |
| 2260 | -0.8772 | 0.0500  | 0.7595  | 0.0904 |
| 2261 | -0.3261 | 0.2040  | -0.0699 | 0.0905 |
| 2262 | -0.5831 | -0.4116 | -0.2509 | 0.0905 |
| 2263 | 0.5831  | 0.7051  | -0.4092 | 0.0906 |
| 2264 | -0.0788 | -0.0048 | -0.1347 | 0.0910 |
| 2265 | -0.7336 | -0.6211 | -0.3634 | 0.0914 |
| 2266 | 0.4776  | -0.0540 | 0.7316  | 0.0917 |
| 2267 | -0.1541 | -0.1281 | -0.1281 | 0.0922 |
| 2268 | 0.4319  | -0.2668 | -0.4936 | 0.0925 |
| 2269 | 0.3449  | -0.0777 | -0.7891 | 0.0926 |
| 2270 | 0.4098  | -0.2701 | -1.1184 | 0.0930 |
| 2271 | 0.3379  | -0.0549 | 0.3126  | 0.0943 |
| 2272 | 0.6591  | -0.1000 | -0.2777 | 0.0943 |
| 2273 | -0.1148 | 0.6352  | -0.2005 | 0.0945 |
| 2274 | -0.1412 | -0.0000 | -0.0807 | 0.0959 |
| 2275 | -0.0797 | -0.0000 | -0.0000 | 0.0962 |
| 2276 | -0.2759 | 0.2072  | -0.3850 | 0.0969 |
| 2277 | 0.1269  | -0.0785 | -0.2807 | 0.0970 |
| 2278 | -0.3712 | -0.1201 | 0.6561  | 0.0970 |
| 2279 | 0.1537  | 0.2519  | -0.0565 | 0.0972 |
| 2280 | -0.0971 | -0.5571 | 0.9974  | 0.0973 |
| 2281 | -0.3818 | 0.9845  | -0.2001 | 0.0975 |
| 2282 | 0.6505  | -0.0918 | -0.0000 | 0.0980 |
| 2283 | -0.0000 | 0.2306  | -0.6729 | 0.0987 |
| 2284 | -0.1006 | -0.1000 | -0.4727 | 0.0988 |
| 2285 | -0.1325 | -0.0335 | 0.2178  | 0.0990 |
| 2286 | 0.5097  | -0.1046 | -0.2048 | 0.0993 |
| 2287 | 1.5281  | -0.5413 | -1.2257 | 0.0994 |
| 2288 | -0.0000 | -0.0000 | -0.0000 | 0.0996 |
| 2289 | 0.3915  | 0.4758  | -0.0000 | 0.1010 |
| 2290 | -0.7025 | 0.2207  | 0.2677  | 0.1014 |
| 2291 | 0.2312  | -0.3374 | -0.0000 | 0.1014 |
| 2292 | -0.1682 | 0.1782  | -0.2076 | 0.1019 |
| 2293 | 0.4228  | 0.4568  | -0.0000 | 0.1031 |
| 2294 | -0.2788 | 0.3548  | -0.2345 | 0.1033 |
| 2295 | -0.1438 | -0.0000 | -0.0000 | 0.1042 |
| 2296 | -0.0500 | -0.2156 | 0.2701  | 0.1045 |
| 2297 | 0.2698  | 0.3596  | -0.2212 | 0.1048 |
| 2298 | 0.0763  | 0.1743  | -0.0000 | 0.1050 |
| 2299 | -0.3818 | 0.4000  | -0.5007 | 0.1059 |
| 2300 | 0.3593  | 0.4560  | -0.8524 | 0.1060 |
| 2301 | 0.4057  | 0.1048  | -0.5113 | 0.1064 |
| 2302 | -0.1368 | 0.5148  | -0.5791 | 0.1064 |
| 2303 | 0.6097  | 0.6298  | -0.3148 | 0.1064 |
| 2304 | -1.9084 | -0.1741 | -0.5602 | 0.1076 |
| 2305 | -0.0000 | 1.0752  | -0.2636 | 0.1077 |
| 2306 | -0.2174 | -0.0000 | -0.0000 | 0.1082 |
| 2307 | -0.2013 | -0.0593 | 0.3652  | 0.1085 |
| 2308 | 0.2547  | -0.3295 | 0.0828  | 0.1086 |
| 2309 | 0.7006  | -0.5258 | -0.2038 | 0.1086 |
| 2310 | -0.0000 | -0.0000 | -0.0000 | 0.1087 |
| 2311 | 0.0928  | -0.1890 | -0.7581 | 0.1089 |
| 2312 | -0.1157 | -0.3280 | -0.0000 | 0.1090 |
| 2313 | 0.4700  | -0.2698 | -1.4338 | 0.1098 |
| 2314 | 0.1687  | -0.5612 | -0.4330 | 0.1104 |
| 2315 | 0.1529  | -0.2423 | -0.0000 | 0.1104 |
| 2316 | 0.1278  | -0.2309 | -0.0674 | 0.1114 |
| 2317 | 0.4678  | -0.0647 | -0.2544 | 0.1117 |
| 2318 | -0.1292 | -0.0741 | 0.3716  | 0.1118 |
| 2319 | 0.1006  | 0.5143  | -0.5805 | 0.1124 |
| 2320 | 0.4537  | -0.1068 | -0.2604 | 0.1127 |
| 2321 | 0.0707  | -0.2594 | 0.4544  | 0.1131 |
| 2322 | 0.7345  | -0.3136 | -0.1134 | 0.1134 |
| 2323 | -0.0598 | -0.2642 | -0.3381 | 0.1146 |
| 2324 | -0.8037 | -0.7648 | 0.2157  | 0.1146 |
| 2325 | -0.4616 | -0.3440 | 1.0809  | 0.1153 |
| 2326 | -0.4054 | -1.1614 | 0.1507  | 0.1159 |
| 2327 | -0.3444 | 0.3142  | -0.3473 | 0.1159 |
| 2328 | 0.1888  | -0.2462 | -0.3123 | 0.1163 |
| 2329 | -0.1335 | 0.6741  | 0.2519  | 0.1166 |
| 2330 | -0.0610 | -0.0000 | -0.1783 | 0.1174 |
| 2331 | -0.4699 | 0.0685  | 0.2666  | 0.1176 |
| 2332 | 0.4948  | -0.4028 | -0.2281 | 0.1179 |
| 2333 | -0.5580 | 0.7489  | 0.5308  | 0.1183 |
| 2334 | -0.1235 | -0.1138 | -0.1159 | 0.1189 |
| 2335 | -0.0000 | -0.5072 | 0.8763  | 0.1191 |
| 2336 | 0.4609  | -0.0581 | -0.1093 | 0.1196 |
| 2337 | -0.0847 | 0.1250  | -0.1700 | 0.1197 |
| 2338 | 0.0924  | 0.4718  | -0.3114 | 0.1199 |
| 2339 | 0.5979  | 0.1019  | -1.4203 | 0.1205 |
| 2340 | 1.4540  | 0.1851  | -0.1218 | 0.1207 |
| 2341 | 0.0922  | 0.0647  | -0.1940 | 0.1210 |
| 2342 | 0.3437  | -0.0000 | -0.4981 | 0.1211 |
| 2343 | -0.0000 | -0.1100 | -0.4589 | 0.1211 |
| 2344 | -0.2318 | -0.0701 | -0.6936 | 0.1214 |
| 2345 | -0.4616 | -0.0866 | -0.1425 | 0.1216 |
| 2346 | -0.0000 | 0.2924  | -0.2644 | 0.1218 |
| 2347 | -0.0638 | 0.4584  | 0.1504  | 0.1220 |
| 2348 | -0.5520 | 0.1206  | -0.0000 | 0.1224 |
| 2349 | -0.3308 | 0.1610  | -0.1403 | 0.1238 |
| 2350 | 1.4041  | -0.1949 | 0.1564  | 0.1241 |
| 2351 | -0.3846 | 1.8544  | 0.6648  | 0.1244 |
| 2352 | 0.1187  | -0.0000 | -0.1878 | 0.1245 |
| 2353 | 0.7709  | -0.1034 | -0.2729 | 0.1247 |
| 2354 | -0.1245 | -0.2420 | -0.1740 | 0.1251 |
| 2355 | -0.0000 | -0.2469 | -0.7734 | 0.1252 |
| 2356 | 0.4263  | -0.5001 | -0.5975 | 0.1255 |
| 2357 | 1.0097  | -0.9218 | -0.1479 | 0.1255 |
| 2358 | -0.0957 | -0.4241 | 0.2484  | 0.1257 |
| 2359 | -0.2614 | 0.4735  | -0.2849 | 0.1263 |
| 2360 | 1.3885  | -0.0000 | -0.6450 | 0.1267 |
| 2361 | -0.1567 | 0.0000  | -0.4963 | 0.1276 |
| 2362 | -0.0000 | -0.1100 | -0.2649 | 0.1279 |
| 2363 | -0.0000 | -0.1100 | -0.4084 | 0.1281 |
| 2364 | -0.0849 | -0.2547 | -0.8918 | 0.1286 |
| 2365 | -0.5244 | -0.2409 | 0.3355  | 0.1288 |
| 2366 | -0.2402 | -0.0643 | 0.1282  | 0.1305 |
| 2367 | -0.3011 | 0.1718  | -0.0000 | 0.1307 |
| 2368 | -0.0938 | 0.3853  | -0.0839 | 0.1313 |
| 2369 | -0.2579 | 0.3026  | 0.1341  | 0.1315 |
| 2370 | 0.2773  | -0.2778 | 0.1447  | 0.1315 |
| 2371 | 0.5679  | 0.9331  | -0.3025 | 0.1316 |
| 2372 | 0.1631  | -0.0000 | -0.2914 | 0.1318 |
| 2373 | -0.3408 | -0.0000 | -0.0000 | 0.1318 |
| 2374 | -0.1884 | 0.1617  | -0.0884 | 0.1318 |
| 2375 | -0.2600 | 0.2814  | -0.0600 | 0.1336 |
| 2376 | -0.8703 | 1.0440  | -0.3147 | 0.1342 |
| 2377 | 0.1557  | -0.2732 | 0.6171  | 0.1349 |
| 2378 | -0.2726 | 0.2449  | 0.4067  | 0.1351 |
| 2379 | -0.0517 | -0.9704 | 1.5862  | 0.1352 |
| 2380 | 0.3481  | -0.4027 | 0.2872  | 0.1354 |
| 2381 | 0.3606  | -0.0892 | 0.1620  | 0.1356 |
| 2382 | -0.2817 | 0.4526  | -0.1053 | 0.1362 |
| 2383 | 0.3497  | 0.0831  | -0.0934 | 0.1373 |

|   |            |                                                                                                 |
|---|------------|-------------------------------------------------------------------------------------------------|
| 0 | Q6PAR5     | GTPase-activating protein and VP59 domain-containing protein 1                                  |
| 0 | P14211     | Calreticulin                                                                                    |
| 0 | Q8VC31     | Coiled-coil domain-containing protein 9                                                         |
| 0 | Q8C2E7     | WASH complex subunit strumpellin                                                                |
| 0 | Q60961     | Lyosomal-associated transmembrane protein 4A                                                    |
| 0 | Q80253     | 28S ribosomal protein S26, mitochondrial                                                        |
| 0 | Q8K1M6     | Dynamin-1-like protein                                                                          |
| 0 | Q8CFE3     | REST corepressor 1                                                                              |
| 0 | A0A0A6FWB0 |                                                                                                 |
| 0 | Q921K6     | E3 ubiquitin-protein ligase ARIH2                                                               |
| 0 | Q8OU35     | Rho guanine nucleotide exchange factor 17                                                       |
| 0 | Q9QXK3     | Coatomer subunit gamma-2                                                                        |
| 0 | P27546     | Microtubule-associated protein 4                                                                |
| 0 | P68510     | 14-3-3 protein eta                                                                              |
| 0 | Q3UHH1     | Zinc finger SWIM domain-containing protein 8                                                    |
| 0 | P26450     | Phosphatidylinositol 3-kinase regulatory subunit alpha                                          |
| 0 | P70353     | Nuclear transcription factor Y subunit gamma                                                    |
| 0 | Q8VDN2     | Sodium/potassium-transporting ATPase subunit alpha-1                                            |
| 0 | Q35609     | Secretory carrier-associated membrane protein 3                                                 |
| 0 | Q805W1     | Putative adenosylhomocysteine 2                                                                 |
| 0 | Q6ZPE2     | Myotubularin-related protein 5                                                                  |
| 0 | Q920E5     | Farnesyl pyrophosphate synthase                                                                 |
| 0 | Q921C5     | Protein bicaudal D homolog 2                                                                    |
| 0 | Q921E2     | Ras-related protein Rab-31                                                                      |
| 0 | Q88811     | Signal transducing adapter molecule 2                                                           |
| 0 | Q8CGG3     | Deubiquitinating protein VCP135                                                                 |
| 0 | P54731     | FAS-associated factor 1                                                                         |
| 0 | Q9Q2Q1     | Adafin                                                                                          |
| 0 | Q9CWX2     | 28S ribosomal protein S22, mitochondrial                                                        |
| 0 | Q9D483     | DNA-directed RNA polymerase III subunit RPC3                                                    |
| 0 | P37040     | NADPH-cytochrome P450 reductase                                                                 |
| 0 | Q3TXS7     | 26S proteasome non-ATPase regulatory subunit 1                                                  |
| 0 | Q3UPF5     | Zinc finger CCHC-type antiviral protein 1                                                       |
| 0 | Q88738     | Baculoviral IAP repeat-containing protein 6                                                     |
| 0 | P51660     | Peroxisomal multifunctional enzyme type 2;[3R]-hydroxacyl-CoA dehydrogenase;Enoyl-CoA hydratase |
| 0 | Q99963     | RNA-binding protein 10                                                                          |
| 0 | Q8CFE5     | Sodium-coupled neutral amino acid transporter 2                                                 |
| 0 | Q88X21     | Protein disulfide-isomerase TMX3                                                                |
| 0 | Q68F16     | Methionine-tRNA ligase, cytoplasmic                                                             |
| 0 | Q9D2E2     | Target of EGR1 protein 1                                                                        |
| 0 | Q88759     | Ubiquitin-protein ligase E3A                                                                    |
| 0 | Q80X82     | Symplekin                                                                                       |
| 0 | Q8CFD4     | Sorting nexin-8                                                                                 |
| 0 | Q3TC46     | Protein PAT1 homolog 1                                                                          |
| 0 | P14824     | Annexin A6                                                                                      |
| 0 | Q97984     | 60S ribosomal protein L22                                                                       |
| 0 | P17809     | Solute carrier family 2, facilitated glucose transporter member 1                               |
| 0 | Q88G30     | Negative elongation factor A                                                                    |
| 0 | Q68F05     | Clathrin heavy chain;Clathrin heavy chain 1                                                     |
| 0 | Q922Y1     | UBX domain-containing protein 1                                                                 |
| 0 | Q88122     | Transducin-like enhancer protein 3                                                              |
| 0 | Q99YV4     | TraB domain-containing protein                                                                  |
| 0 | Q7TT37     | Elongator complex protein 1                                                                     |
| 0 | P41216     | Long-chain-fatty acid-CoA ligase 1                                                              |
| 0 | P23138     | Furin                                                                                           |
| 0 | Q99P99     | Tripartite motif-containing protein 16                                                          |
| 0 | P60122     | RuB-like 1                                                                                      |
| 0 | P81117     | Nucleobindin-2;Nesfatin-1                                                                       |
| 0 | Q59178     | Mitimin, mitochondrial                                                                          |
| 0 | Q88HX9     | DNA excision repair protein ERCC-6-like                                                         |
| 0 | Q55WU9     | Acetyl-CoA carboxylase 1;Biotin carboxylase                                                     |
| 0 | Q9E800     | Syntaxin-12                                                                                     |
| 0 | Q88L80     | Rho GTPase-activating protein 22                                                                |
| 0 | Q99X03     | Golgi reassembly-stacking protein 2                                                             |
| 0 | Q9J067     | Coiled-coil domain-containing protein 22                                                        |
| 0 | Q924W5     | Structural maintenance of chromosomes protein 6                                                 |
| 0 | Q8K490     | pre-mRNA 3' end processing protein WDR33                                                        |
| 0 | Q5A962     | Barrier-to-autointegration factor;Barrier-to-autointegration factor, N-terminally processed     |
| 0 | P57746     | V-type proton ATPase subunit D                                                                  |
| 0 | Q99N88     | Ubiquitin-4                                                                                     |
| 0 | P54775     | 26S proteasome regulatory subunit 6B                                                            |
| 0 | P39054     | Dynamin-2                                                                                       |
| 0 | P10852     | 4F2 cell-surface antigen heavy chain                                                            |
| 0 | Q88WY9     | Protein CIP2A                                                                                   |
| 0 | Q9J128     | Protein flightless-1 homolog                                                                    |
| 0 | P11431     | Activated RNA polymerase II transcriptional coactivator p15                                     |
| 0 | Q8C059     | Metalloreductase STEAP3                                                                         |
| 0 | Q35344     | Importin subunit alpha-4                                                                        |
| 0 | Q05C18     | La-related protein 7                                                                            |
| 0 | Q9WUP7     | Ubiquitin carboxyl-terminal hydrolase isozyme L5                                                |
| 0 | Q6ZQ88     | Lysine-specific histone demethylase 1A                                                          |
| 0 | Q99K00     | Vacuole membrane protein 1                                                                      |
| 0 | Q922K7     | Probable 28S rRNA (cytosine-C(5))-methyltransferase                                             |
| 0 | Q70503     | Very-long-chain 3-oxoacyl-CoA reductase                                                         |
| 0 | Q922B2     | Aspartate-tRNA ligase, cytoplasmic                                                              |
| 0 | P59516     | V-type proton ATPase catalytic subunit A                                                        |
| 0 | Q6Z351     | Transferrin receptor protein 1                                                                  |
| 0 | Q88H24     | Transmembrane 9 superfamily member 4                                                            |
| 0 | Q9QXK7     | Cleavage and polyadenylation specificity factor subunit 3                                       |
| 0 | P58771     | Tropomyosin alpha-1 chain                                                                       |
| 0 | Q88736     | 3-keto-steroid reductase                                                                        |
| 0 | P97855     | Ras GTPase-activating protein-binding protein 1                                                 |
| 0 | Q9D0C1     | E3 ubiquitin-protein ligase RNF115                                                              |
| 0 | Q3TA68     |                                                                                                 |
| 0 | P6Z245     | 40S ribosomal protein S15a                                                                      |
| 0 | Q80YV2     | Nuclear-interacting partner of ALK                                                              |
| 0 | Q8K2V1     | Serine/threonine-protein phosphatase 4 regulatory subunit 1                                     |
| 0 | P35579     | 60S ribosomal protein L12                                                                       |
| 0 | Q6WK28     | E3 ubiquitin-protein ligase UBR2                                                                |
| 0 | P00405     | Cytochrome c oxidase subunit 2                                                                  |
| 0 | P61202     | COP9 signalosome complex subunit 2                                                              |
| 0 | Q7TPV4     | Myb-binding protein 1A                                                                          |
| 0 | P00375     | Dihydrofolate reductase                                                                         |
| 0 | Q8BLF1     | Neutral cholesterol ester hydrolase 1                                                           |
| 0 | Q8VHX6     | Filamin-C                                                                                       |
| 0 | P51174     | Long-chain specific acyl-CoA dehydrogenase, mitochondrial                                       |
| 0 | Q91VK1     | Basic leucine zipper and W2 domain-containing protein 2                                         |
| 0 | P14685     | 26S proteasome non-ATPase regulatory subunit 3                                                  |
| 0 | Q3UPL0     | Protein transport protein Sec31A                                                                |
| 0 | Q9EP18     | Importin-7                                                                                      |
| 0 | Q6Z383     | Transcription elongation factor SPT6                                                            |
| 0 | Q98049     | E3 ubiquitin-protein ligase AMFR                                                                |
| 0 | Q920P4     | Paralemm-1                                                                                      |
| 0 | P27659     | 60S ribosomal protein L3                                                                        |
| 0 | Q42567     | Epidermal growth factor receptor substrate 15                                                   |
| 0 | P63837     | DnaI homolog subfamily A member 1                                                               |
| 0 | P91Y87     | Pre-mRNA-processing factor 6                                                                    |
| 0 | Q61990     | Polyl(C)-binding protein 2                                                                      |
| 0 | Q80Z96     | Vang-like protein 1                                                                             |
| 0 | Q6NKL1     |                                                                                                 |
| 0 | Q3TH22     | Myosin regulatory light chain 12B                                                               |
| 0 | Q8K3D3     | DNA repair protein SWI5 homolog                                                                 |
| 0 | P70206     | Plexin-A1                                                                                       |
| 0 | Q91WV0     | Protein Dr1                                                                                     |
| 0 | Q9QX70     | Protein canopy homolog 2                                                                        |
| 0 | Q8K1N4     | NuDC domain-containing protein 3                                                                |

|             |            |   |
|-------------|------------|---|
| Gapvd1      | mmu:66691  |   |
| Calr        | mmu:12317  |   |
| Ccdc9       | mmu:243846 |   |
| Kiaa0196    | mmu:223593 |   |
| Laptm4a     |            |   |
| Mrps26      | mmu:99045  |   |
| Dnm1l       | mmu:74006  |   |
| Rcor1       | mmu:217864 |   |
| Mbn1l       |            |   |
| Arlh2       | mmu:23807  |   |
| Arhgef17    | mmu:207212 | 1 |
| Cogp2       | mmu:54160  |   |
| Map4        | mmu:17758  |   |
| Ywhah       | mmu:22629  |   |
| Zswim8      | mmu:268721 |   |
| Plk3r1      | mmu:18708  |   |
| Nlfc        | mmu:18046  |   |
| Atp1a1      | mmu:11928  |   |
| Scamp3      | mmu:24045  |   |
| Ahcyl1      | mmu:229709 |   |
| Sbf1        | mmu:77980  | 1 |
| Fdps        | mmu:110196 |   |
| Bicd2       | mmu:76895  |   |
| Rab31       | mmu:106572 |   |
| Stam2       | mmu:56324  |   |
| Vcpip1      | mmu:70675  |   |
| Faf1        | mmu:14084  |   |
| MLH4        | mmu:17356  |   |
| Mrps22      | mmu:64655  |   |
| Poir3c      | mmu:74414  |   |
| Por         | mmu:18984  |   |
| Psmid1      | mmu:70247  |   |
| Zc3hav1     | mmu:78781  |   |
| Birc6       | mmu:12211  |   |
| Hri Hsd17b4 | mmu:15488  |   |
| Rbm10       | mmu:236732 |   |
| Slc38a2     | mmu:67760  |   |
| Tmx3        | mmu:67988  |   |
| Mars        | mmu:216443 |   |
| Toe1        | mmu:68276  |   |
| Ube3a       | mmu:22215  | 1 |
| Sympk       |            |   |
| Snx8        | mmu:231834 |   |
| Patl1       | mmu:225929 |   |
| Anxa6       | mmu:11749  |   |
| Rpl22       | mmu:19934  |   |
| Slc2a1      | mmu:20525  |   |
| Nelfa       | mmu:24116  |   |
| Ctfc        | mmu:67300  |   |
| Ubnw1       | mmu:225896 |   |
| Tie3        | mmu:21887  |   |
| Trabd       | mmu:67976  |   |
| Ikbpap      | mmu:230233 |   |
| Acs1l       | mmu:14081  |   |
| Furin       | mmu:18550  |   |
| Trim16      | mmu:94092  |   |
| Ruvbl1      | mmu:56505  |   |
| Nucb2       | mmu:53322  |   |
| Ndufb2      | mmu:75597  |   |
| Erccll      | mmu:236930 |   |
| Acaca       | mmu:107476 |   |
| Stx12       | mmu:100226 |   |
| Arhgap22    | mmu:239027 |   |
| Gorasp2     | mmu:70231  |   |
| Ccdc22      | mmu:54638  |   |
| Smc6        | mmu:67241  |   |
| Wdr33       | mmu:74320  |   |
| Banf1       | mmu:23825  |   |
| Atp6v1d     | mmu:73834  |   |
| Ubeqin4     | mmu:94232  |   |
| Psmc4       | mmu:23996  |   |
| Dnm2        | mmu:13430  | 1 |
| Slc3a2      | mmu:17254  |   |
| C330027C1   | mmu:224171 |   |
| Fili        | mmu:14248  |   |
| Sub1        | mmu:20024  |   |
| Steap3      | mmu:68428  |   |
| Kpna3       | mmu:16648  |   |
| Larp7       | mmu:28036  |   |
| Uchl5       | mmu:56207  |   |
| Kdm1a       | mmu:99982  |   |
| Vmp1        | mmu:75909  |   |
| Ncp2        |            |   |
| Hsd17b12    | mmu:56348  |   |
| Dars        | mmu:226414 |   |
| Atp6v1a     | mmu:11964  |   |
| Tfrc        | mmu:22042  |   |
| Tm9sf4      | mmu:99237  |   |
| Cpsf3       | mmu:54451  |   |
| Tpm1        | mmu:22003  | 1 |
| Hsd17b7     | mmu:15490  |   |
| G3bp1       | mmu:27041  |   |
| Rnf115      | mmu:67845  | 1 |
| Wdr36       |            |   |
| Rps15a      | mmu:267019 |   |
| Zc3hc1      | mmu:232679 | 1 |
| Ppp4r1      | mmu:70351  |   |
| Rpl12       | mmu:269261 |   |
| Ubr2        | mmu:224826 | 1 |
| Mtco2       | mmu:17709  |   |
| Cps2        | mmu:12848  |   |
| Mybbp1a     | mmu:18432  |   |
| Dhr         | mmu:13361  |   |
| Nceh1       | mmu:320024 |   |
| Finc        | mmu:68794  |   |
| Acadl       | mmu:11363  |   |
| Bzw2        | mmu:66912  |   |
| Psmid3      | mmu:22123  |   |
| Sec31a      | mmu:69162  |   |
| Ipo7        | mmu:233726 |   |
| Supt6h      | mmu:20926  |   |
| Anfr        | mmu:23802  |   |
| Palm        | mmu:18483  | 1 |
| Rpl3        | mmu:27367  |   |
| Eps15       | mmu:13858  |   |
| Dnaja1      | mmu:15502  |   |
| Prpf6       | mmu:68879  |   |
| Pcbp2       | mmu:18521  |   |
| Vangl1      | mmu:229658 |   |
| Sec24d      | mmu:69608  |   |
| My12a2M     | mmu:67938  |   |
| Swi5        | mmu:73931  |   |
| Ptxa1       | mmu:18844  |   |
| Dr1         | mmu:13486  |   |
| Cnpy2       | mmu:56530  |   |
| Nudcd3      | mmu:209586 |   |

|      |         |         |         |        |
|------|---------|---------|---------|--------|
| 2384 | -0.0636 | 0.0876  | 0.5595  | 0.1375 |
| 2385 | -0.0993 | 0.0606  | -1.0745 | 0.1377 |
| 2386 | -0.4029 | -1.3506 | 2.3558  | 0.1385 |
| 2387 | 0.0802  | 0.0191  | -0.0925 | 0.1387 |
| 2388 | -0.7747 | 0.8157  | -0.4263 | 0.1388 |
| 2389 | -0.3652 | -0.2772 | 0.1389  | 0.1387 |
| 2390 | -0.2059 | -0.4834 | 0.1773  | 0.1381 |
| 2391 | -0.0411 | -0.0830 | 0.3808  | 0.1391 |
| 2392 | 0.0657  | -0.2085 | 0.1415  | 0.1392 |
| 2393 | -0.2108 | 1.2730  | -0.0539 | 0.1394 |
| 2394 | -0.0001 | -0.0852 | 0.0662  | 0.1397 |
| 2395 | -0.3697 | 0.5699  | 0.5449  | 0.1398 |
| 2396 | 0.3053  | -0.1977 | 0.3023  | 0.1403 |
| 2397 | 0.3807  | 0.1100  | 0.3046  | 0.1410 |
| 2398 | -0.0000 | 0.3434  | -0.2079 | 0.1415 |
| 2399 | 0.1001  | 1.6570  | -0.1903 | 0.1416 |
| 2400 | 0.4582  | 0.8955  | -0.2509 | 0.1417 |
| 2401 | -0.0858 | -0.0000 | -0.3647 | 0.1420 |
| 2402 | -0.4548 | -0.0000 | 0.6010  | 0.1434 |
| 2403 | -0.4472 | -0.6669 | 1.1747  | 0.1436 |
| 2404 | 0.6518  | -0.1243 | 0.1029  | 0.1443 |
| 2405 | 0.3197  | 0.0546  | -0.3123 | 0.1444 |
| 2406 | -0.0870 | 0.0690  | 1.0805  | 0.1444 |
| 2407 | -0.1108 | -0.1051 | -0.0000 | 0.1446 |
| 2408 | -0.0982 | 0.4165  | -0.4510 | 0.1446 |
| 2409 | 0.2308  | -0.1220 | 1.1454  | 0.1447 |
| 2410 | -0.2403 | 0.2071  | -0.2403 | 0.1447 |
| 2411 | -0.2801 | 0.3996  | 0.0898  | 0.1449 |
| 2412 | -0.4186 | 0.4303  | 0.9247  | 0.1454 |
| 2413 | -0.1241 | 0.6724  | -0.1029 | 0.1455 |
| 2414 | -0.3998 | 0.5491  | 0.2017  | 0.1460 |
| 2415 | -0.1418 | 0.1405  | 0.3019  | 0.1469 |
| 2416 | 0.2349  | 0.2929  | 0.1697  | 0.1485 |
| 2417 | -0.9348 | 0.6032  | -0.3849 | 0.1490 |
| 2418 | -0.0011 | 0.5291  | -0.0000 | 0.1492 |
| 2419 | 0.3225  | 0.3741  | -0.1496 | 0.1496 |
| 2420 | 0.0930  | 0.2071  | -0.3769 | 0.1496 |
| 2421 | -0.0000 | 0.2017  | -0.5432 | 0.1509 |
| 2422 | -0.0532 | 0.8892  | -0.7798 | 0.1509 |
| 2423 | -0.0000 | 0.5571  | -0.1844 | 0.1517 |
| 2424 | 0.2252  | -0.0676 | 0.0984  | 0.1520 |
| 2425 | -0.7172 | 0.2743  | 0.0961  | 0.1520 |
| 2426 | 0.2605  | -0.1476 | -0.3018 | 0.1523 |
| 2427 | 1.2798  | 0.6984  | -1.0398 | 0.1524 |
| 2428 | 0.4325  | 0.1388  | -0.0907 | 0.1531 |
| 2429 | -0.1078 | 0.3499  | -0.2145 | 0.1532 |
| 2430 | 1.5847  | 0.1378  | -0.6449 | 0.1537 |
| 2431 | 0.1998  | 0.4827  | -0.2269 | 0.1544 |
| 2432 | 0.2407  | -0.5121 | -0.1953 | 0.1548 |
| 2433 | -0.0780 | 0.3702  | -1.0811 | 0.1554 |
| 2434 | 0.1688  | 0.8273  | -0.3739 | 0.1558 |
| 2435 | -0.0639 | 0.0508  | 0.1499  | 0.1558 |
| 2436 | -0.2750 | 0.4406  | -0.0000 | 0.1561 |
| 2437 | -0.1659 | 0.2202  | -0.0946 | 0.1562 |
| 2438 | -0.0000 | -0.0000 | 0.1027  | 0.1566 |
| 2439 | -0.5086 | 0.3749  | -0.0000 | 0.1572 |
| 2440 | -0.4668 | 0.3749  | -0.3089 | 0.1573 |
| 2441 | -0.1593 | 0.8907  | -1.5706 | 0.1574 |
| 2442 | -0.0830 | 0.4451  | -1.0170 | 0.1576 |
| 2443 | -0.1883 | 0.6796  | -0.3385 | 0.1576 |
| 2444 | -0.2356 | 0.4442  | -0.7041 | 0.1580 |
| 2445 | -1.1641 | -0.0000 | 1.5228  | 0.1582 |
| 2446 | 0.3460  | -0.4572 | -0.3348 | 0.1583 |
| 2447 | -0.7199 | 0.5759  | -0.2421 | 0.1588 |
| 2448 | -0.0576 | -0.4342 | -0.4250 | 0.1591 |
| 2449 | -0.5951 | 0.1149  | -0.3886 | 0.1591 |
| 2450 | -1.0238 | -0.1149 | -1.4108 | 0.1598 |
| 2451 | -0.0000 | -0.1041 | -0.2500 | 0.1599 |
| 2452 | -0.2196 | -0.0947 | 0.3612  | 0.1601 |
| 2453 | -0.3270 | -0.0796 | 0.2497  | 0.1607 |
| 2454 | -0.0000 | 0.1558  | -0.0000 | 0.1611 |
| 2455 | -0.0000 | 0.2597  | -0.3156 | 0.1611 |
| 2456 | 0.1989  | 0.4269  | -0.8051 | 0.1614 |
| 2457 | -0.0593 | -0.1842 | 0.1872  | 0.1615 |
| 2458 | -0.5255 | -0.1215 | -0.1781 | 0.1616 |
| 2459 | -0.0000 | 0.1254  | -0.1464 | 0.1623 |
| 2460 | -0.1254 | 0.3415  | -0.3529 | 0.1628 |
| 2461 | -0.0000 | -0.0000 | -0.3629 | 0.1629 |
| 2462 | -0.3851 | 0.7234  | 0.0969  | 0.1625 |
| 2463 | -0.2514 | -0.4976 | 0.6005  | 0.1630 |
| 2464 | -0.1887 | -0.0931 | 0.3149  | 0.1640 |
| 2465 | -0.3233 | 0.4014  | 0.3115  | 0.1644 |
| 2466 | -0.2870 | 0.1341  | 0.1567  | 0.1646 |
| 2467 | -0.2481 | -0.3906 | 0.4833  | 0.1656 |
| 2468 | -0.2274 | -0.1081 | 0.6787  | 0.1658 |
| 2469 | -0.1442 | -0.2102 | -0.0000 | 0.1660 |
| 2470 | -0.3532 | -0.0000 | -0.3262 | 0.1666 |
| 2471 | -0.9646 | -0.2021 | -0.1127 | 0.1668 |
| 2472 | -0.2286 | -0.2048 | -0.3489 | 0.1671 |
| 2473 | -0.0000 | -0.2223 | 0.1506  | 0.1676 |
| 2474 | 0.2675  | -0.2084 | 0.3831  | 0.1681 |
| 2475 | 0.7245  | -0.3785 | 0.0712  | 0.1693 |
| 2476 | 0.0691  | -0.3787 | -0.1554 | 0.1697 |
| 2477 | 0.2664  | -0.0000 | 0.4649  | 0.1698 |
| 2478 | -0.2811 | 0.7400  | -0.3974 | 0.1703 |
| 2479 | -0.0193 | 0.2684  | -0.6605 | 0.1707 |
| 2480 | -0.1892 | -0.6768 | -0.3740 | 0.1710 |
| 2481 | -0.1314 | -0.3065 | 0.3339  | 0.1712 |
| 2482 | -0.2668 | 0.2811  | -0.0513 | 0.1722 |
| 2483 | 0.1712  | -0.8521 | 0.3268  | 0.1741 |
| 2484 | -0.1843 | -0.4230 | 0.6493  | 0.1746 |
| 2485 | -0.0741 | 0.5615  | 0.0680  | 0.1747 |
| 2486 | -0.3898 | 0.0413  | 0.3518  | 0.1748 |
| 2487 | -0.1006 | -0.0000 | 0.9478  | 0.1756 |
| 2488 | 0.9372  | -0.0000 | -0.0848 | 0.1763 |
| 2489 | 1.2314  | -0.2305 | -0.4789 | 0.1763 |
| 2490 | -0.0000 | -0.0000 | -0.1105 | 0.1765 |
| 2491 | -0.0000 | -0.0000 | 0.2245  | 0.1766 |
| 2492 | -0.3406 | -0.0932 | 1.1108  | 0.1769 |
| 2493 | 0.4430  | -0.3418 | 0.1217  | 0.1770 |
| 2494 | 0.0000  | -0.3501 | 0.4791  | 0.1771 |
| 2495 | -0.0000 | 0.3383  | 0.3341  | 0.1771 |
| 2496 | 0.5594  | -0.0000 | -0.2770 | 0.1775 |
| 2497 | -0.1492 | 0.5384  | 0.1916  | 0.1777 |
| 2498 | -0.1776 | 0.1093  | -0.0000 | 0.1779 |
| 2499 | -0.2640 | -0.0888 | -0.4602 | 0.1783 |
| 2500 | -0.7880 | -0.5633 | -0.5763 | 0.1784 |
| 2501 | -0.3039 | -0.1471 | 1.4045  | 0.1784 |
| 2502 | 0.5214  | -0.4798 | 0.5471  | 0.1785 |
| 2503 | 0.3451  | -0.0000 | -0.0000 | 0.1786 |
| 2504 | -0.6883 | 0.1836  | 0.4284  | 0.1789 |
| 2505 | -0.0709 | 0.1967  | -0.0889 | 0.1796 |
| 2506 | -0.0000 | 0.2138  | -0.3260 | 0.1797 |
| 2507 | -0.2920 | 0.4221  | 0.2467  | 0.1808 |
| 2508 | -0.0941 | -0.0700 | -0.2860 | 0.1815 |
| 2509 | -0.7019 | 0.4268  | -0.0000 | 0.1818 |

|   |        |                                                                                                       |
|---|--------|-------------------------------------------------------------------------------------------------------|
| 0 | Q9CVD2 | Ataxin-3                                                                                              |
| 0 | Q9J1C2 | Sodium/myo-inositol cotransporter                                                                     |
| 0 | Q920Q4 | Vacuolar protein sorting-associated protein 16 homolog                                                |
| 0 | Q99N89 | 39S ribosomal protein L43, mitochondrial                                                              |
| 0 | P62331 | ADP-ribosylation factor 6                                                                             |
| 0 | P22347 | Prostaglandin G/H synthase 1                                                                          |
| 0 | Q9P601 | U5 small nuclear ribonucleoprotein 40 kDa protein                                                     |
| 0 | Q9BWW6 | NEDD8-activating enzyme E1 regulatory subunit                                                         |
| 0 | Q09KV5 | Chromodomain-helicase-DNA-binding protein 8                                                           |
| 0 | Q61103 | Zinc finger protein ubi-d4                                                                            |
| 0 | Q35704 | Serine palmitoyltransferase 1                                                                         |
| 0 | Q91267 | SUT-ROBO Rho GTPase-activating protein 2                                                              |
| 0 | Q35226 | 26S proteasome non-ATPase regulatory subunit 4                                                        |
| 0 | P55937 | Golgin subfamily A member 3                                                                           |
| 0 | Q8V0I3 | Vigilin                                                                                               |
| 0 | Q9R0H0 | Peroxisomal acyl-coenzyme A oxidase 1                                                                 |
| 0 | Q9ESU6 | Bromodomain-containing protein 4                                                                      |
| 0 | P35293 | Ras-related protein Rab-18                                                                            |
| 0 | P57776 | Elongation factor 1-delta                                                                             |
| 0 | Q9CR98 | Protein FAM136A                                                                                       |
| 0 | Q90CL8 | Protein phosphatase inhibitor 2                                                                       |
| 0 | P21107 | Tropomyosin alpha-3 chain                                                                             |
| 0 | Q9WUK2 | Eukaryotic translation initiation factor 4H                                                           |
| 0 | P18872 | Guanine nucleotide-binding protein (G <i>o</i> ) subunit alpha                                        |
| 0 | Q04750 | DNA topoisomerase 1                                                                                   |
| 0 | Q9C528 | Diphthine- $\alpha$ -ammonia ligase                                                                   |
| 0 | Q38172 | Oxysterol-binding protein 1                                                                           |
| 0 | Q8R605 | Heterogeneous nuclear ribonucleoprotein A3                                                            |
| 0 | Q35621 | Phosphomannomutase 1/Phosphomannomutase                                                               |
| 0 | Q78K21 | Up-regulated during skeletal muscle growth protein 5                                                  |
| 0 | D3YK11 | Atherin                                                                                               |
| 0 | Q320M9 |                                                                                                       |
| 0 | Q88KC5 | Importin-5                                                                                            |
| 0 | Q9CXC3 | Mitochondrial genome maintenance exonuclease 1                                                        |
| 0 | Q92024 | Heterogeneous nuclear ribonucleoproteins C1/C2                                                        |
| 0 | P54126 | DNA mismatch repair protein Msh6                                                                      |
| 0 | P49717 | DNA replication licensing factor MCM4                                                                 |
| 0 | Q92101 | Eukaryotic translation initiation factor 3 subunit G                                                  |
| 0 | Q35295 | Transcriptional activator protein Pur-beta                                                            |
| 0 | P46414 | Cyclin-dependent kinase inhibitor 1B                                                                  |
| 0 | Q35K15 | Coatomer subunit delta                                                                                |
| 0 | Q62093 | Serine/arginine-rich splicing factor 2                                                                |
| 0 | Q9CR26 | Vacuolar protein sorting-associated protein VTA1 homolog                                              |
| 0 | Q88R72 | CDKN2A-interacting protein                                                                            |
| 0 | Q8V0D8 | WAS protein family homolog 1                                                                          |
| 0 | Q8V0M6 | Heterogeneous nuclear ribonucleoprotein U-like protein 1                                              |
| 0 | Q3CPD0 | Nucleoplasmin-3                                                                                       |
| 0 | Q31079 | Protein phosphatase 1 regulatory subunit 21                                                           |
| 0 | Q91Y66 | Importin-9                                                                                            |
| 0 | Q99LD9 | Translation initiation factor eIF-2B subunit beta                                                     |
| 0 | Q80X98 |                                                                                                       |
| 0 | Q8QZ11 | Eukaryotic translation initiation factor 3 subunit L                                                  |
| 0 | P53994 | Ras-related protein Rab-2A                                                                            |
| 0 | Q64010 | Adapter molecule crk                                                                                  |
| 0 | P62196 | 26S protease regulatory subunit 8                                                                     |
| 0 | P38036 | T-complex protein 1 subunit epsilon                                                                   |
| 0 | Q70133 | ATP-dependent RNA helicase A                                                                          |
| 0 | P62806 | Histone H4                                                                                            |
| 0 | P42669 | Transcriptional activator protein Pur-alpha                                                           |
| 0 | Q9ER64 | Oxysterol-binding protein/Oxysterol-binding protein-related protein 5                                 |
| 0 | P42859 | Huntingtin                                                                                            |
| 0 | Q9D7E4 | UPF0449 protein C19orf25 homolog                                                                      |
| 0 | E9Q1M6 |                                                                                                       |
| 0 | Q9J119 | Acidic fibroblast growth factor intracellular-binding protein                                         |
| 0 | Q8H7Q2 | Ubiquitin carboxyl-terminal hydrolase CYLD                                                            |
| 0 | G60634 | Fliotilin-2                                                                                           |
| 0 | Q9CQ71 | Replication protein A 14 kDa subunit                                                                  |
| 0 | Q3U406 | Pachytene checkpoint protein 2 homolog                                                                |
| 0 | P19096 | Fatty acid synthase/[Acyl-carrier-protein] S-acetyltransferase/[Acyl-carrier-protein] S-malonyltransf |
| 0 | Q9QZM0 | Ubiquitin-2                                                                                           |
| 0 | Q35286 | Pre-mRNA-splicing factor ATP-dependent RNA helicase DHX15                                             |
| 0 | P97310 | DNA replication licensing factor MCM2                                                                 |
| 0 | Q88539 | Myc box-dependent-interacting protein 1                                                               |
| 0 | Q8R1U1 | Conserved oligomeric Golgi complex subunit 4                                                          |
| 0 | P01897 | H-2 class I histocompatibility antigen, L-D alpha chain                                               |
| 0 | Q61881 | DNA replication licensing factor MCM7                                                                 |
| 0 | Q60658 | Heterogeneous nuclear ribonucleoprotein D0                                                            |
| 0 | P50544 | Very long-chain specific acyl-CoA dehydrogenase, mitochondrial                                        |
| 0 | Q9C500 | Cactin                                                                                                |
| 0 | Q9ES75 | Acidic leucine-rich nuclear phosphoprotein 32 family member 8                                         |
| 0 | P60843 | Eukaryotic initiation factor 4A-1                                                                     |
| 0 | Q88569 | Heterogeneous nuclear ribonucleoproteins A2/B1                                                        |
| 0 | Q80892 | Syntenin-1                                                                                            |
| 0 | Q8VE88 | Protein FAM114A2                                                                                      |
| 0 | Q9JH17 | Exosome complex component RRP45                                                                       |
| 0 | Q88MA6 | Signal recognition particle subunit SRP68                                                             |
| 0 | P94094 | ADP-ribosylation factor 5                                                                             |
| 0 | Q8VEH3 | ADP-ribosylation factor-like protein 8A                                                               |
| 0 | Q9C585 |                                                                                                       |
| 0 | Q9QZES | Coatomer subunit gamma-1                                                                              |
| 0 | Q61035 | Histidine-tRNA ligase, cytoplasmic                                                                    |
| 0 | P50247 | Adenosylhomocysteinase                                                                                |
| 0 | Q8VBX6 | Multiple PDZ domain protein                                                                           |
| 0 | Q57119 | Aldehyde dehydrogenase family 16 member A1                                                            |
| 0 | Q9CWK3 | CD2 antigen cytoplasmic tail-binding protein 2                                                        |
| 0 | Q92139 | Cell division control protein 45 homolog                                                              |
| 0 | Q60953 | Protein PML                                                                                           |
| 0 | Q88R84 | Melanoma inhibitory activity protein 3                                                                |
| 0 | Q88NU0 | Armaddillo repeat-containing protein 6                                                                |
| 0 | Q9CY62 | E3 ubiquitin-protein ligase RNF181                                                                    |
| 0 | Q8K3W0 | BRCA1-A complex subunit BRE                                                                           |
| 0 | Q9CQV4 | Protein FAM134C                                                                                       |
| 0 | Q9JIF7 | Coatomer subunit beta                                                                                 |
| 0 | Q8BU03 | Periodic tryptophan protein 2 homolog                                                                 |
| 0 | P40212 | Adenylyl cyclase-associated protein 1                                                                 |
| 0 | Q313P7 | Rho guanine nucleotide exchange factor 40                                                             |
| 0 | Q8R0X7 | Sphingosine-1-phosphate lyase 1                                                                       |
| 0 | Q8VB79 | Tether containing UBX domain for GLUT4                                                                |
| 0 | P47857 | ATP-dependent 6-phosphofructokinase, muscle type                                                      |
| 0 | Q8R5H1 | Ubiquitin carboxyl-terminal hydrolase 15                                                              |
| 0 | Q9DAD0 | Calponin-3                                                                                            |
| 0 | Q9JMD0 | BUB3-interacting and GLEBS motif-containing protein ZNF207                                            |
| 0 | Q9CZD3 | Glycine-tRNA ligase                                                                                   |
| 0 | Q99M11 | ELKS/Rab6-interacting/CAST family member 1                                                            |
| 0 | P33811 | DNA polymerase alpha subunit B                                                                        |
| 0 | Q64152 | Transcription factor BTF3                                                                             |
| 0 | Q8R497 | Serine/arginine-rich splicing factor 7                                                                |
| 0 | Q8R0X2 | CDK2-associated and cullin domain-containing protein 1                                                |
| 0 | Q8OC03 | Tripartite motif-containing protein 47                                                                |
| 0 | Q50117 | Phosphatase and actin regulator 4                                                                     |
| 0 | Q80XQ2 | TBC1 domain family member 5                                                                           |
| 0 | Q64674 | Spermidine synthase                                                                                   |
| 0 | Q7J113 | Bromodomain-containing protein 2                                                                      |
| 0 | Q8K4Q8 | Collectin-12                                                                                          |
| 0 | Q9D8W5 | 26S proteasome non-ATPase regulatory subunit 12                                                       |
| 0 | Q9D4H8 | Cullin-2                                                                                              |

|         |            |
|---------|------------|
| Atxn3   | mmu:110616 |
| Slc5a3  | mmu:53881  |
| Vps16   |            |
| Mrlp43  |            |
| Arf6    | mmu:11845  |
| Ptgs1   | mmu:19224  |
| Strap40 | mmu:66585  |
| Nae1    | mmu:234664 |
| Chd8    | mmu:67772  |
| Dpl2    | mmu:19708  |
| Sptlc1  | mmu:268656 |
| Srgap2  | mmu:14270  |
| Psmad4  | mmu:19185  |
| Golga3  | mmu:269682 |
| Hdbp    | mmu:110611 |
| Acov1   | mmu:11430  |
| Brd4    | mmu:57261  |
| Rab18   | mmu:19330  |
| Eef1d   | mmu:66656  |



|      |         |         |         |        |
|------|---------|---------|---------|--------|
| 2510 | 0.6646  | -0.1522 | -0.1328 | 0.1823 |
| 2511 | 0.1267  | 0.1583  | -0.1267 | 0.1824 |
| 2512 | 1.5548  | 0.3302  | -1.0401 | 0.1825 |
| 2513 | -0.5953 | -0.0707 | 0.2777  | 0.1831 |
| 2514 | 0.6589  | -0.4238 | 0.1920  | 0.1834 |
| 2515 | -0.2557 | -0.0771 | 0.4328  | 0.1839 |
| 2516 | -0.0048 | -0.2788 | 0.3117  | 0.1845 |
| 2517 | -0.4290 | -0.1537 | 0.2940  | 0.1842 |
| 2518 | -0.0024 | -0.1914 | 0.1843  | 0.1843 |
| 2519 | 0.0862  | -0.1174 | 0.0928  | 0.1848 |
| 2520 | -0.3161 | 0.3378  | -1.1697 | 0.1853 |
| 2521 | -0.1180 | 0.2809  | 0.0952  | 0.1856 |
| 2522 | 0.9137  | 0.4682  | -0.5912 | 0.1865 |
| 2523 | -0.3255 | 0.2592  | 0.2504  | 0.1866 |
| 2524 | -0.5791 | 0.0688  | 0.2090  | 0.1872 |
| 2525 | -0.4418 | -0.2048 | 0.5557  | 0.1873 |
| 2526 | -0.6322 | -1.2479 | 0.3906  | 0.1877 |
| 2527 | -0.0546 | 1.5476  | 0.4646  | 0.1880 |
| 2528 | 0.3190  | 0.4646  | -0.3641 | 0.1882 |
| 2529 | 0.1393  | 0.6543  | -0.3025 | 0.1883 |
| 2530 | 0.3132  | -0.1907 | -0.6325 | 0.1891 |
| 2531 | -0.2877 | 0.0823  | 0.1703  | 0.1896 |
| 2532 | -0.0178 | 0.4559  | -0.5286 | 0.1907 |
| 2533 | 0.9513  | 0.2687  | -1.5758 | 0.1922 |
| 2534 | 1.0931  | 1.6422  | -0.4825 | 0.1949 |
| 2535 | -0.5881 | -0.2842 | 0.5137  | 0.1949 |
| 2536 | -0.4552 | 1.1655  | 0.4658  | 0.1952 |
| 2537 | -0.2641 | 0.0348  | -0.4027 | 0.1954 |
| 2538 | 0.3227  | 0.3832  | -0.1814 | 0.1956 |
| 2539 | 0.0446  | -0.0788 | -0.1858 | 0.1957 |
| 2540 | -0.2431 | 0.0664  | -0.1523 | 0.1962 |
| 2541 | 1.3317  | 0.6838  | -1.5986 | 0.1965 |
| 2542 | -0.3507 | 0.7454  | 0.1851  | 0.1984 |
| 2543 | 0.0626  | -0.0705 | -0.1007 | 0.1989 |
| 2544 | 0.2647  | -0.0705 | 0.1104  | 0.1989 |
| 2545 | -0.2630 | -0.3055 | -0.0729 | 0.1990 |
| 2546 | -0.0448 | -0.0788 | -0.2127 | 0.1991 |
| 2547 | -0.2758 | 0.3505  | 0.6247  | 0.1996 |
| 2548 | 0.5628  | 0.5941  | -0.4248 | 0.2007 |
| 2549 | 0.1268  | 0.2279  | -0.0521 | 0.2010 |
| 2550 | -0.5864 | -0.1070 | 0.1883  | 0.2013 |
| 2551 | -0.3087 | 0.2678  | 0.1120  | 0.2014 |
| 2552 | -0.2728 | 0.5235  | 0.1057  | 0.2031 |
| 2553 | -0.1045 | 0.0901  | -0.1880 | 0.2034 |
| 2554 | -0.1045 | 0.0901  | -0.1880 | 0.2037 |
| 2555 | -0.1817 | -0.2829 | -0.2048 | 0.2048 |
| 2556 | 0.2632  | 0.4598  | -0.1550 | 0.2047 |
| 2557 | 0.0970  | -0.1402 | -0.1231 | 0.2054 |
| 2558 | 0.1701  | -1.1126 | 0.7211  | 0.2056 |
| 2559 | -0.1435 | -0.3024 | 0.3024  | 0.2067 |
| 2560 | 0.7682  | -0.2785 | 0.2829  | 0.2085 |
| 2561 | 0.1244  | -0.1571 | 0.0508  | 0.2087 |
| 2562 | 0.2551  | 0.0769  | 0.0703  | 0.2096 |
| 2563 | -0.3588 | 0.3592  | -0.0782 | 0.2101 |
| 2564 | 0.0889  | 0.5519  | -0.2505 | 0.2101 |
| 2565 | -0.0000 | 0.5970  | 0.0187  | 0.2107 |
| 2566 | -0.1473 | 0.5621  | -0.1785 | 0.2108 |
| 2567 | 0.5133  | -0.1823 | -0.0000 | 0.2110 |
| 2568 | -0.0000 | 0.9038  | -0.0956 | 0.2111 |
| 2569 | -0.0900 | -0.7502 | 1.1473  | 0.2115 |
| 2570 | -0.1246 | 1.3387  | 0.5251  | 0.2117 |
| 2571 | 0.4083  | 0.3429  | -0.5012 | 0.2124 |
| 2572 | -0.4861 | 0.2571  | 0.5048  | 0.2126 |
| 2573 | 0.2454  | 0.3632  | -0.3954 | 0.2132 |
| 2574 | -0.2109 | -0.1088 | -0.6144 | 0.2144 |
| 2575 | -0.2255 | 0.8156  | -0.3254 | 0.2145 |
| 2576 | -0.1101 | -0.2458 | -0.2887 | 0.2147 |
| 2577 | -0.0641 | -0.0927 | -0.0148 | 0.2148 |
| 2578 | -0.7193 | -0.2953 | 0.3630  | 0.2158 |
| 2579 | 0.6231  | 0.2081  | -0.2091 | 0.2167 |
| 2580 | 0.3652  | -0.0101 | -0.4545 | 0.2168 |
| 2581 | -0.2941 | -0.5474 | 0.2573  | 0.2172 |
| 2582 | 0.6300  | -0.2587 | 0.3341  | 0.2174 |
| 2583 | 0.0707  | -0.3864 | 0.3635  | 0.2176 |
| 2584 | 0.1747  | -0.0850 | 0.2287  | 0.2179 |
| 2585 | 0.1022  | -0.0570 | 0.6928  | 0.2181 |
| 2586 | 0.9300  | -0.3788 | 0.2186  | 0.2186 |
| 2587 | -0.1973 | -0.2363 | 0.1090  | 0.2186 |
| 2588 | -0.3269 | -0.0000 | 0.3354  | 0.2189 |
| 2589 | -0.3721 | 0.5217  | 0.7257  | 0.2204 |
| 2590 | -0.1050 | 0.9276  | -0.0000 | 0.2207 |
| 2591 | -0.0000 | 0.4530  | 0.3182  | 0.2218 |
| 2592 | -0.0832 | 0.7865  | 0.2749  | 0.2228 |
| 2593 | 0.5229  | -0.3527 | 0.4888  | 0.2237 |
| 2594 | 0.0957  | -0.1538 | -0.1167 | 0.2245 |
| 2595 | -0.3421 | 0.3114  | -0.1771 | 0.2250 |
| 2596 | -0.0988 | -0.3685 | 0.3685  | 0.2260 |
| 2597 | 0.5043  | 0.4547  | -0.0738 | 0.2251 |
| 2598 | -0.6935 | 1.2502  | -0.1704 | 0.2256 |
| 2599 | 0.2059  | 0.8520  | -0.1806 | 0.2257 |
| 2600 | 0.0788  | -0.5695 | -0.6281 | 0.2268 |
| 2601 | -0.1473 | 0.8794  | -1.0381 | 0.2268 |
| 2602 | -0.0000 | 0.1419  | -0.4022 | 0.2269 |
| 2603 | 2.2196  | -0.5814 | 0.7383  | 0.2273 |
| 2604 | -0.0248 | -0.1465 | -0.0000 | 0.2275 |
| 2605 | -0.0000 | -0.1269 | -0.0000 | 0.2276 |
| 2606 | -0.1139 | 0.6138  | -0.5403 | 0.2285 |
| 2607 | -0.1344 | 0.5707  | 0.3084  | 0.2308 |
| 2608 | -0.1357 | 0.7198  | 0.9984  | 0.2319 |
| 2609 | -0.0720 | 0.4193  | 0.2504  | 0.2320 |
| 2610 | -0.0872 | 0.0431  | -0.2471 | 0.2323 |
| 2611 | 0.2465  | 0.7571  | -0.2155 | 0.2323 |
| 2612 | -0.2336 | -0.0000 | 0.3778  | 0.2332 |
| 2613 | 0.0600  | -0.2028 | -0.0000 | 0.2341 |
| 2614 | 0.1455  | -0.1747 | 0.3901  | 0.2351 |
| 2615 | -0.3845 | -0.0000 | 0.3389  | 0.2355 |
| 2616 | -0.0000 | -0.1628 | 0.3269  | 0.2369 |
| 2617 | -0.0536 | 0.3379  | 0.2930  | 0.2374 |
| 2618 | 0.2859  | 0.2384  | -0.2077 | 0.2374 |
| 2619 | -0.3775 | -0.0000 | -0.1331 | 0.2381 |
| 2620 | -0.2582 | -0.7246 | 0.8448  | 0.2399 |
| 2621 | 0.1282  | 0.7318  | -0.1395 | 0.2399 |
| 2622 | -0.0000 | 1.0389  | 0.0507  | 0.2406 |
| 2623 | 0.3173  | 0.6944  | -0.3924 | 0.2417 |
| 2624 | -0.8107 | 0.0924  | 0.2029  | 0.2420 |
| 2625 | -0.0000 | -0.4314 | -0.4314 | 0.2440 |
| 2626 | -0.3726 | 0.6785  | -0.1474 | 0.2441 |
| 2627 | -1.1910 | 0.6355  | -0.2754 | 0.2459 |
| 2628 | 0.0942  | 0.0639  | -0.0000 | 0.2461 |
| 2629 | -0.1838 | 0.9411  | 0.4848  | 0.2468 |
| 2630 | 0.4783  | -0.0939 | -0.0000 | 0.2472 |
| 2631 | 0.1266  | -0.7061 | -0.0000 | 0.2487 |
| 2632 | -0.0826 | 0.0640  | -0.2781 | 0.2489 |
| 2633 | -0.0000 | -0.5107 | -0.0000 | 0.2491 |
| 2634 | 0.3045  | -0.0000 | -0.0562 | 0.2494 |
| 2635 | -0.1047 | 0.4915  | 0.4574  | 0.2498 |

|   |         |                                                                                                   |
|---|---------|---------------------------------------------------------------------------------------------------|
| 0 | Q6NVG1  | Lysophospholipid acyltransferase LPCAT4                                                           |
| 0 | P56546  | C-terminal-binding protein 2                                                                      |
| 0 | Q9WU28  | Prefoldin subunit 5                                                                               |
| 0 | O55022  | Membrane-associated progesterone receptor component 1                                             |
| 0 | Q9JHP8  | Chromatin accessibility complex protein 1                                                         |
| 0 | Q91WK0  | Leucine-rich repeat flightless-interacting protein 2                                              |
| 0 | O29945  | Eukaryotic translation initiation factor 2 subunit 2                                              |
| 0 | Q9CQW2  | ADP-ribosylation factor-like protein 8B                                                           |
| 0 | P23242  | Gap junction alpha-1 protein                                                                      |
| 0 | P63017  | Heat shock cognate 71 kDa protein                                                                 |
| 0 | P10833  | Ras-related protein R-Ras                                                                         |
| 0 | A6H523  | Exocyst complex component 68                                                                      |
| 0 | Q9D7J4  | Cytochrome c oxidase protein 20 homolog                                                           |
| 0 | Q9JHU0  | Tropomodulin-3                                                                                    |
| 0 | P43883  | Perilipin-2                                                                                       |
| 0 | Q8WV74  | Anamorsin                                                                                         |
| 0 | Q83C05  | DNA-directed RNA polymerase                                                                       |
| 0 | P62960  | Nuclease-sensitive element-binding protein 1                                                      |
| 0 | Q8R0G7  | Protein spinstor homolog 1                                                                        |
| 0 | Q8BYA0  | Tubulin-specific chaperone D                                                                      |
| 0 | Q9EQ28  | DNA polymerase delta subunit 3                                                                    |
| 0 | Q62189  | U1 small nuclear ribonucleoprotein A                                                              |
| 0 | P60060  | Protein transport protein Sec61 subunit gamma                                                     |
| 0 | Q9Z0H4  | CUGBP Elav-like family member 2                                                                   |
| 0 | Q9WV77  | E3 ubiquitin-protein ligase RLM                                                                   |
| 0 | Q8RLN0  | Zinc finger protein 830                                                                           |
| 0 | Q8U078  | Pumilio homolog 1                                                                                 |
| 0 | Q6A098  |                                                                                                   |
| 0 | P46938  | Transcriptional coactivator YAP1                                                                  |
| 0 | Q8VEE4  | Replication protein A 70 kDa DNA-binding subunit;Replication protein A 70 kDa DNA-binding subunit |
| 0 | O54940  | BCL2/adenovirus E1B 19 kDa protein-interacting protein 2                                          |
| 0 | Q8CC12  | Codanin-1                                                                                         |
| 0 | P27208  | Small nuclear ribonucleoprotein-associated protein 8;Small nuclear ribonucleoprotein-associated   |
| 0 | P08113  | Endoplasmic                                                                                       |
| 0 | Q99J10  | Protein dyx-30 homolog                                                                            |
| 0 | Q6P9B4  | PEST proteolytic signal-containing nuclear protein                                                |
| 0 | Q70152  | Dolichyl-phosphate mannosyltransferase subunit 1                                                  |
| 0 | Q62433  | Protein NDRG1                                                                                     |
| 0 | P17047  | Lysosome-associated membrane glycoprotein 1                                                       |
| 0 | Q9J179  | Phosphorylated adapter RNA export protein                                                         |
| 0 | Q8CFI0  | E3 ubiquitin-protein ligase NEDD4-like                                                            |
| 0 | Q8H547  | Vesicle-trafficking protein SEC22b                                                                |
| 0 | P56183  | Ribosomal RNA processing protein 1 homolog A                                                      |
| 0 | P80318  | T-complex protein 1 subunit gamma                                                                 |
| 0 | Q9D024  | Coiled-coil domain-containing protein 47                                                          |
| 0 | Q292182 | Large proline-rich protein BAG6                                                                   |
| 0 | P17170  | Hexokinase-Hexokinase-1                                                                           |
| 0 | P35123  | Ubiquitin carboxyl-terminal hydrolase;Ubiquitin carboxyl-terminal hydrolase 4                     |
| 0 | Q8R3H9  | Tetratricopeptide repeat protein 4                                                                |
| 0 | P70398  | Ubiquitin carboxyl-terminal hydrolase;Probable ubiquitin carboxyl-terminal hydrolase FAF-X        |
| 0 | P46978  | Dolichyl-diphosphooligosaccharide--protein glycosyltransferase subunit STT3A                      |
| 0 | Q31V55  | Zinc finger CCH domain-containing protein 15                                                      |
| 0 | P97311  | DNA replication licensing factor MCM6;DNA helicase                                                |
| 0 | Q8C4Y3  | Negative elongation factor 8                                                                      |
| 0 | Q8C2E4  | Pentatricopeptide repeat-containing protein 1, mitochondrial                                      |
| 0 | Q35343  | Importin subunit alpha-3                                                                          |
| 0 | Q8R817  | Gem-associated protein 5                                                                          |
| 0 | Q8K0V4  | CCRA-NOT transcription complex subunit 3                                                          |
| 0 | P97333  | Neurophilin-1                                                                                     |
| 0 | Q9D6Y9  | 1,4-alpha-glucan-branching enzyme                                                                 |
| 0 | P6Y616  |                                                                                                   |
| 0 | Q70439  | Syntaxin-7                                                                                        |
| 0 | Q9D0L8  | mRNA cap guanine-N7 methyltransferase                                                             |
| 0 | Q8C011  | Alkylidihydroxyacetonephosphate synthase, peroxisomal                                             |
| 0 | Q44P22  | Endothelin-converting enzyme 1                                                                    |
| 0 | Q61749  | Translation initiation factor eIF-2B subunit delta                                                |
| 0 | Q9CQ08  | Maspin                                                                                            |
| 0 | Q62418  | Drebrin-like protein                                                                              |
| 0 | Q8C095  | Oxysterol-binding protein;Oxysterol-binding protein-related protein 11                            |
| 0 | Q60605  | Myosin light polypeptide 6                                                                        |
| 0 | Q37022  | FA5-associated factor 2                                                                           |
| 0 | Q5NCJ0  |                                                                                                   |
| 0 | Q6P8X1  | Sorting nexin-6;Sorting nexin-6, N-terminally processed                                           |
| 0 | Q78HU7  | Glycophorin-C                                                                                     |
| 0 | P97452  | Ribosome biogenesis protein BOP1                                                                  |
| 0 | Q66138  | Calcium-binding protein 39                                                                        |
| 0 | Q8C650  | Cilia- and flagella-associated protein 36                                                         |
| 0 | Q8H529  | Calpain-2 catalytic subunit                                                                       |
| 0 | Q5SW19  | Clustered mitochondria protein homolog                                                            |
| 0 | Q9D110  | Coiled-coil-helix-coiled-coil-helix domain-containing protein 2                                   |
| 0 | Q8R2X4  | Splicing regulatory glutamine/lysine-rich protein 1                                               |
| 0 | Q35658  | Complement component 1 Q subcomponent-binding protein, mitochondrial                              |
| 0 | Q70475  | UDP-glucose 6-dehydrogenase                                                                       |
| 0 | Q70591  | Prefoldin subunit 2                                                                               |
| 0 | B2R054  | Plexin-B2                                                                                         |
| 0 | Q51734  | Dolichyl-diphosphooligosaccharide--protein glycosyltransferase 48 kDa subunit                     |
| 0 | Q6P9V8  |                                                                                                   |
| 0 | Q8R415  | CCRA-NOT transcription complex subunit 10                                                         |
| 0 | P63038  | Translationally-controlled tumor protein                                                          |
| 0 | Q8CH25  | SABF-like transcription modulator                                                                 |
| 0 | Q9CWI3  | BRCA2 and CDKN1A-interacting protein                                                              |
| 0 | P28659  | CUGBP Elav-like family member 1                                                                   |
| 0 | Q9CQF9  | Prenylcysteine oxidase                                                                            |
| 0 | Q9CR57  | 60S ribosomal protein L14                                                                         |
| 0 | Q8B033  | Acetolactate synthase-like protein                                                                |
| 0 | Q91W52  | Transmembrane protein 19                                                                          |
| 0 | Q9WU01  | STIP1 homology and U box-containing protein 1                                                     |
| 0 | Q8R727  | Mannose-1-phosphate guanylttransferase beta                                                       |
| 0 | P25976  | Nuclear transcription factor 1                                                                    |
| 0 | Q8R1A4  | Dedicator of cytokinesis protein 7                                                                |
| 0 | Q8C053  | Cdc42-interacting protein 4                                                                       |
| 0 | Q6ZWY9  | Histone H2B type 1-C/E/G;Histone H2B type 2-B;Histone H2B type 1-H;Histone H2B type 1-M           |
| 0 | G3X9X1  |                                                                                                   |
| 0 | P35562  | Calnexin                                                                                          |
| 0 | Q692R2  | E3 ubiquitin-protein ligase HECTD1                                                                |
| 0 | Q8B0J9  | Membrane-associated progesterone receptor component 2                                             |
| 0 | Q70435  | Proteasome subunit alpha type 3                                                                   |
| 0 | Q9D0Z5  | Eukaryotic translation initiation factor 3 subunit K                                              |
| 0 | P28660  | Nck-associated protein 1                                                                          |
| 0 | Q9ERK4  | Exportin-2                                                                                        |
| 0 | Q5SVR0  | TBC1 domain family member 9B                                                                      |
| 0 | Q8K3A9  | 75K snRNA methylphosphate capping enzyme                                                          |
| 0 | Q91ZR2  | Sorting nexin;Sorting nexin-18                                                                    |
| 0 | Q9QWH1  | Polyhomeotic-like protein 2                                                                       |
| 0 | CD109   | antigen                                                                                           |
| 0 | Q8H0D5  | Myosin-9                                                                                          |
| 0 | P13705  | DNA mismatch repair protein Msh3                                                                  |
| 0 | Q35239  | Tyrosine-protein phosphatase non-receptor type 9                                                  |
| 0 | Q692N7  | Myoferlin                                                                                         |
| 0 | P54823  | Probable ATP-dependent RNA helicase DDX6                                                          |
| 0 | Q64211  | Bcl-2-like protein 1                                                                              |
| 0 | F8VQ05  |                                                                                                   |
| 0 | Q8VE97  | Serine/arginine-rich splicing factor 4                                                            |
| 0 | P26516  | 26S proteasome non-ATPase regulatory subunit 7                                                    |
| 0 | Q8B0Y1  | 26S proteasome non-ATPase regulatory subunit 5                                                    |
| 0 | Q6G099  | Probable ATP-dependent RNA helicase DDX58                                                         |

|         |            |
|---------|------------|
| Lpcat4  | mmu:99010  |
| Ctbp2   | mmu:13017  |
| Pfdn5   | mmu:56612  |
| Pgrmc1  | mmu:53328  |
| Chrac1  | mmu:93696  |
| Lrrfip2 | mmu:71268  |
| Ef3a2   | mmu:67204  |
| Ar18b   | mmu:67166  |
| Gja1    | mmu:14609  |
| Hspa8   | mmu:15481  |
| Rras    | mmu:20130  |
| Exoc6b  | mmu:75914  |
| Cox20   | mmu:66359  |
| Tmod3   | mmu:50875  |
| Plin2   | mmu:11520  |
| Capn1   | mmu:109006 |
| Poli3a  | mmu:218832 |
| Ybx1    | mmu:22608  |

|      |         |         |         |         |
|------|---------|---------|---------|---------|
| 2636 | -0.0535 | -0.0616 | -0.3662 | 0.2498  |
| 2637 | -0.4939 | 0.8130  | 1.0233  | 0.2498  |
| 2638 | -0.3653 | -0.4247 | 1.1945  | 0.2506  |
| 2639 | -0.3691 | 0.1054  | 0.6525  | 0.2506  |
| 2640 | -0.5411 | 0.1022  | 0.8217  | 0.2521  |
| 2641 | -0.0902 | 0.0124  | 0.0046  | 0.2521  |
| 2642 | -0.0668 | -0.5348 | -0.4003 | 0.25324 |
| 2643 | -0.3617 | -0.1965 | -0.3657 | 0.2524  |
| 2644 | 0.4673  | -0.5370 | -0.5832 | 0.2533  |
| 2645 | 0.5485  | -0.1592 | -0.4043 | 0.2537  |
| 2646 | 0.0712  | -0.0597 | 0.1398  | 0.2544  |
| 2647 | -0.2283 | 0.6786  | 0.4000  | 0.2548  |
| 2648 | -0.1976 | -0.1434 | 0.7119  | 0.2556  |
| 2649 | -0.6029 | 0.8092  | 0.9915  | 0.2561  |
| 2650 | 0.1252  | -0.0835 | 0.5114  | 0.2567  |
| 2651 | -0.2410 | -0.0000 | 0.4001  | 0.2571  |
| 2652 | -0.0866 | 0.3336  | 0.4038  | 0.2571  |
| 2653 | -0.3984 | -0.0000 | -0.2157 | 0.2571  |
| 2654 | -0.6508 | -0.2121 | 1.1724  | 0.2573  |
| 2655 | -0.4487 | 0.3216  | 0.2381  | 0.2577  |
| 2656 | -0.1611 | 0.6151  | 0.8862  | 0.2583  |
| 2657 | -0.0834 | 0.2247  | -0.1807 | 0.2584  |
| 2658 | -0.1506 | 0.1881  | -0.1333 | 0.2590  |
| 2659 | -0.0546 | -0.3247 | 0.1110  | 0.2592  |
| 2660 | -0.2719 | 0.3281  | -0.0538 | 0.2600  |
| 2661 | -0.2176 | 0.2708  | -0.0825 | 0.2600  |
| 2662 | -0.4127 | 0.3043  | -0.0000 | 0.26047 |
| 2663 | -0.0688 | -0.0404 | 0.6758  | 0.2605  |
| 2664 | -0.1183 | 0.3403  | 0.4336  | 0.2618  |
| 2665 | -0.2243 | -0.1318 | 0.3780  | 0.2620  |
| 2666 | 0.0864  | 0.2847  | -0.0000 | 0.2624  |
| 2667 | 0.6904  | 0.2089  | -0.0173 | 0.2628  |
| 2668 | -0.6096 | 0.1754  | 0.5274  | 0.2630  |
| 2669 | 0.3709  | 0.0716  | -0.0408 | 0.2647  |
| 2670 | 0.6118  | -0.3258 | -0.0000 | 0.2651  |
| 2671 | -0.0029 | -0.3905 | -0.1545 | 0.2664  |
| 2672 | -0.0769 | 0.5905  | -0.0000 | 0.2671  |
| 2673 | -0.0424 | 0.7438  | -0.5941 | 0.2681  |
| 2674 | -0.4060 | 0.3065  | -0.0241 | 0.2701  |
| 2675 | 0.5364  | 0.0635  | -0.1884 | 0.2706  |
| 2676 | -0.2500 | -0.6693 | 0.1948  | 0.2712  |
| 2677 | 0.6676  | -0.3700 | 0.4502  | 0.2717  |
| 2678 | 0.2321  | 0.1046  | -0.5650 | 0.2719  |
| 2679 | 0.3598  | -0.1898 | -0.0000 | 0.2722  |
| 2680 | -0.2871 | 0.6349  | -0.5807 | 0.2726  |
| 2681 | 0.7118  | -0.1185 | -0.1878 | 0.2728  |
| 2682 | 0.3034  | 0.1438  | -0.2218 | 0.2738  |
| 2683 | -0.4981 | -0.0000 | -0.3902 | 0.2731  |
| 2684 | -0.3307 | 0.1704  | -0.0747 | 0.2735  |
| 2685 | -0.3241 | -0.1541 | 0.1347  | 0.2738  |
| 2686 | -0.0000 | 1.8652  | -0.7218 | 0.2743  |
| 2687 | -0.8857 | -0.0597 | 0.5791  | 0.2749  |
| 2688 | -0.2082 | 0.5800  | 0.1588  | 0.2752  |
| 2689 | -0.4060 | 0.0574  | 0.3562  | 0.2753  |
| 2690 | 0.0998  | 0.2577  | -0.0907 | 0.2761  |
| 2691 | 0.4030  | 0.7187  | -0.1180 | 0.2762  |
| 2692 | -0.3690 | 0.8388  | -0.1788 | 0.2765  |
| 2693 | -0.8546 | 0.1343  | -0.1976 | 0.2774  |
| 2694 | -0.1105 | 0.5662  | -0.0000 | 0.2778  |
| 2695 | 1.9507  | 0.7314  | -0.9296 | 0.2791  |
| 2696 | -0.2582 | 0.2267  | -0.3510 | 0.2800  |
| 2697 | 0.3874  | 0.4049  | -0.1783 | 0.2805  |
| 2698 | 0.1662  | -0.0357 | -0.0000 | 0.2813  |
| 2699 | -0.3957 | 0.0705  | 0.4892  | 0.2814  |
| 2700 | -0.3975 | 0.3484  | 0.2685  | 0.2815  |
| 2701 | -0.0688 | 0.9271  | -0.0889 | 0.2819  |
| 2702 | 0.4731  | -0.0808 | -0.3581 | 0.2827  |
| 2703 | -0.4853 | -0.0840 | 0.1069  | 0.2827  |
| 2704 | -0.0823 | 0.1936  | 0.4413  | 0.2834  |
| 2705 | -1.3410 | 1.0147  | 1.1190  | 0.2841  |
| 2706 | 0.3017  | -0.0000 | -0.0836 | 0.2844  |
| 2707 | -0.1963 | 0.9388  | 0.5508  | 0.2848  |
| 2708 | 0.3699  | -0.5730 | 0.1874  | 0.2850  |
| 2709 | -0.5037 | -0.1487 | 0.1340  | 0.2851  |
| 2710 | 0.1123  | -0.1023 | -0.6680 | 0.2854  |
| 2711 | 0.8859  | 0.2188  | -0.5485 | 0.2855  |
| 2712 | -0.8191 | -0.0000 | -0.1080 | 0.2857  |
| 2713 | 1.3100  | -0.1961 | -0.1000 | 0.2869  |
| 2714 | 0.4269  | 0.2244  | -0.1474 | 0.2870  |
| 2715 | -0.1275 | 0.1406  | 0.2486  | 0.2871  |
| 2716 | -0.0557 | -0.9183 | 0.3713  | 0.2873  |
| 2717 | 1.8015  | 1.3518  | -0.4356 | 0.2877  |
| 2718 | -0.0000 | 0.3459  | -0.2202 | 0.2889  |
| 2719 | 0.2207  | 0.9025  | -0.3531 | 0.2900  |
| 2720 | 0.4163  | -0.0646 | 0.1397  | 0.2901  |
| 2721 | 0.7900  | -0.1098 | -0.6714 | 0.2906  |
| 2722 | -0.0000 | 1.1082  | -0.5789 | 0.2906  |
| 2723 | -1.1581 | 0.3635  | -0.3532 | 0.2908  |
| 2724 | -0.4552 | 0.1821  | -0.1246 | 0.2911  |
| 2725 | -0.5615 | 0.3089  | -0.1653 | 0.2914  |
| 2726 | -0.3386 | -0.8164 | 0.3478  | 0.2917  |
| 2727 | -0.8030 | 0.6658  | 0.5536  | 0.2918  |
| 2728 | -0.0667 | 0.0903  | 0.4443  | 0.2950  |
| 2729 | -0.1022 | 0.9923  | -0.0707 | 0.2958  |
| 2730 | -0.2879 | 0.4706  | -0.5737 | 0.2959  |
| 2731 | -0.1228 | 0.7312  | -0.1185 | 0.2965  |
| 2732 | -0.2756 | 0.3805  | -0.9189 | 0.2971  |
| 2733 | -0.0000 | -0.3303 | -0.1305 | 0.2985  |
| 2734 | -0.9101 | 0.9387  | 0.7886  | 0.2985  |
| 2735 | 0.0938  | 0.4434  | -0.2336 | 0.2996  |
| 2736 | 0.5582  | 1.4563  | -0.1479 | 0.3000  |
| 2737 | -0.0000 | 0.8785  | -0.1248 | 0.3008  |
| 2738 | 0.2889  | -0.9585 | 0.6199  | 0.3011  |
| 2739 | 0.2853  | -0.0000 | -0.1478 | 0.3016  |
| 2740 | -0.2348 | -0.1877 | -0.2670 | 0.3027  |
| 2741 | -0.0285 | -0.1091 | 0.4328  | 0.3028  |
| 2742 | -0.1421 | -0.2386 | 0.4965  | 0.3051  |
| 2743 | -0.3457 | -0.4381 | 1.1316  | 0.3066  |
| 2744 | -0.4787 | -0.7569 | -0.0000 | 0.3069  |
| 2745 | -0.0000 | -0.0000 | 0.7149  | 0.3072  |
| 2746 | -0.1812 | -0.0904 | 0.3195  | 0.3075  |
| 2747 | 0.2779  | 0.6225  | -0.2025 | 0.3080  |
| 2748 | 0.1339  | 0.2497  | -0.3157 | 0.3106  |
| 2749 | 0.2436  | 0.7561  | -0.6356 | 0.3109  |
| 2750 | 0.1581  | -0.1470 | -0.3373 | 0.3130  |
| 2751 | -0.2786 | 0.1674  | -0.4328 | 0.3133  |
| 2752 | -0.1376 | 0.2855  | 1.2977  | 0.3133  |
| 2753 | -0.5296 | -0.7237 | 0.5451  | 0.3124  |
| 2754 | -0.2544 | -0.2479 | 0.4946  | 0.3125  |
| 2755 | -0.1183 | 0.1313  | -0.6704 | 0.3125  |
| 2756 | 0.4117  | 0.4756  | -0.1778 | 0.3130  |
| 2757 | -0.8693 | 0.3594  | 0.1008  | 0.3148  |
| 2758 | -0.0880 | -0.4803 | 0.6172  | 0.3155  |
| 2759 | 1.2093  | -0.4043 | -0.0782 | 0.3170  |
| 2760 | 0.5821  | 0.1446  | -0.4269 | 0.3185  |
| 2761 | 1.3304  | 0.8565  | -1.1345 | 0.3185  |

|   |         |                                                                                           |
|---|---------|-------------------------------------------------------------------------------------------|
| 0 | QBW75   | Importin-4                                                                                |
| 0 | QB8051  |                                                                                           |
| 0 | Q35623  | BET1 homolog                                                                              |
| 0 | Q99KN9  | Clathrin interactor 1                                                                     |
| 0 | Q3YU17  | Nicalin                                                                                   |
| 0 | Q35226  | 26S proteasome non-ATPase regulatory subunit 4                                            |
| 0 | Q9D824  | Pre-mRNA 3'-end processing factor FIP1                                                    |
| 0 | Q9CXF4  | TBC1 domain family member 15                                                              |
| 0 | Q9QXAS  | U6 snRNA-associated Sm-like protein Lsm4                                                  |
| 0 | Q9CZP5  | Mitochondrial chaperone BC51                                                              |
| 0 | Q3TIR3  | Syembryn-A                                                                                |
| 0 | P84104  | Serine/arginine-rich splicing factor 3                                                    |
| 0 | Q6P844  | Tyrosine-protein phosphatase non-receptor type 23                                         |
| 0 | Q9QY36  | N-alpha-acetyltransferase 10                                                              |
| 0 | Q9D8U8  | Sorting nexin-5                                                                           |
| 0 | Q6PFQ7  | Ras GTPase-activating protein 4                                                           |
| 0 | Q9J1I8  | 60S ribosomal protein L38                                                                 |
| 0 | Q9J106  | Histone deacetylase 1/Histone deacetylase                                                 |
| 0 | Q9D8T7  | SRA stem-loop-interacting RNA-binding protein, mitochondrial                              |
| 0 | P84078  | ADP-ribosylation factor 1/ADP-ribosylation factor 3                                       |
| 0 | Q3U1A2  | Rho GTPase-activating protein 17                                                          |
| 0 | Q61235  | Beta-2-syntrophin                                                                         |
| 0 | Q8R366  | Immunoglobulin superfamily member 8                                                       |
| 0 | A2AWA9  | Rab GTPase-activating protein 1                                                           |
| 0 | Q8R1X6  | Spartin                                                                                   |
| 0 | Q95029  | Cotactin subunit beta                                                                     |
| 0 | Q8R4F7  | CDP-diacylglycerol-glycerol 3-phosphate 3-phosphatidyltransferase, mitochondrial          |
| 0 | B9E180  |                                                                                           |
| 0 | P53386  | Monocarboxylate transporter 1                                                             |
| 0 | P20108  | Thioredoxin-dependent peroxide reductase, mitochondrial                                   |
| 0 | Q8R870  | Vacuolar protein sorting-associated protein 13C                                           |
| 0 | E9Q5K9  | YTH domain-containing protein 1                                                           |
| 0 | Q9EPC1  | Alpha-parvin                                                                              |
| 0 | Q6NVF4  | DNA helicase B                                                                            |
| 0 | Q8R850  | Eukaryotic peptide chain release factor GTP-binding subunit ERF3A                         |
| 0 | Q2P7J1  | A-kinase anchor protein 9                                                                 |
| 0 | P63071  | Ras-related protein R-Ra2                                                                 |
| 0 | Q55F07  | Insulin-like growth factor 2 mRNA-binding protein 2                                       |
| 0 | Q921F4  | Heterogeneous nuclear ribonucleoprotein L-like                                            |
| 0 | Q2Y0W2  | Protein misato homolog 1                                                                  |
| 0 | P63011  | Ras-related protein Rab-3A                                                                |
| 0 | Q3T0X8  | tRNA (guanine(26)-N(2))-dimethyltransferase                                               |
| 0 | Q9D880  | Mitochondrial import inner membrane translocase subunit TIM50                             |
| 0 | Q8C318  | Protein HGH1 homolog                                                                      |
| 0 | Q8R3V5  | Endophilin-B2                                                                             |
| 0 | Q35543  | AP-1 complex subunit beta-1                                                               |
| 0 | Q8R784  | Treacle protein                                                                           |
| 0 | P19426  | Negative elongation factor E                                                              |
| 0 | Q9D8V0  | Minor histocompatibility antigen H13                                                      |
| 0 | Q88544  | COP9 signalosome complex subunit 4                                                        |
| 0 | Q5XG71  | Small subunit processome component 20 homolog                                             |
| 0 | Q921G8  | Gamma-tubulin complex component 2                                                         |
| 0 | Q3UYV9  | Nuclear cap-binding protein subunit 1                                                     |
| 0 | Q9JIC8  | AP-3 complex subunit mu-1                                                                 |
| 0 | P11688  | Integrin alpha-5/integrin alpha-5 heavy chain/integrin alpha-5 light chain                |
| 0 | Q8R8C2  | Probable lysosomal cobalamin transporter                                                  |
| 0 | Q8R667  | Protein ERF3 homolog A                                                                    |
| 0 | Q921Q7  | Ras and Rab interactor 1                                                                  |
| 0 | Q99P97  | E3 ubiquitin-protein ligase TRIM33                                                        |
| 0 | Q8R8H0  | Histone deacetylase complex subunit SAP130                                                |
| 0 | P51150  | Ras-related protein Rab-7a                                                                |
| 0 | Q99LDA  | COP9 signalosome complex subunit 1                                                        |
| 0 | Q9QJUM  | Proteasome subunit alpha type-6                                                           |
| 0 | Q89079  | Cotactin subunit epsilon                                                                  |
| 0 | E9QAE3  |                                                                                           |
| 0 | P97450  | ATP synthase-coupling factor 6, mitochondrial                                             |
| 0 | Q8C384  | Vacuolar protein sorting-associated protein 53 homolog                                    |
| 0 | Q922D4  | Serine/threonine-protein phosphatase 6 regulatory subunit 3                               |
| 0 | Q8C129  | Leucyl-cystinyl aminopeptidase                                                            |
| 0 | Q80785  | DOB1 and CUL4-associated factor 5                                                         |
| 0 | G3XK93  | Brefeldin A-inhibited guanine nucleotide-exchange protein 1                               |
| 0 | P45700  | Mannosyl-oligosaccharide 1,2-alpha-mannosidase 1A/alpha-1,2-Mannosidase                   |
| 0 | B9EKI3  | TATA element modulatory factor                                                            |
| 0 | Q8C547  | HEAT repeat-containing protein 58                                                         |
| 0 | Q55N20  | Girdin                                                                                    |
| 0 | Q99N94  | 35S ribosomal protein L9, mitochondrial                                                   |
| 0 | Q99526  | Surfactin locus protein 2                                                                 |
| 0 | Q6QFX2  | Anthrax toxin receptor 2                                                                  |
| 0 | Q6NVF9  | Cleavage and polyadenylation specificity factor subunit 6                                 |
| 0 | Q7TQ95  | Protein lunapark                                                                          |
| 0 | Q9D852  | Tumor protein p63-regulated gene 1-like protein                                           |
| 0 | Q9D834  | Charged multivesicular body protein 2a                                                    |
| 0 | Q9JHE7  | Protein TSSC4                                                                             |
| 0 | Q60596  | DNA repair protein XRCC1                                                                  |
| 0 | Q35593  | 26S proteasome non-ATPase regulatory subunit 14                                           |
| 0 | Q55Z82  |                                                                                           |
| 0 | Q6Q996  | Serine/threonine-protein phosphatase 2A 56 kDa regulatory subunit gamma isoform           |
| 0 | P55258  | Ras-related protein Rab-8A                                                                |
| 0 | Q8C878  | NEDD8-activating enzyme E1 catalytic subunit                                              |
| 0 | Q9QXD8  | LIM domain-containing protein 1                                                           |
| 0 | Q8RWP8  | Beta-1,4-glucuronyltransferase 1                                                          |
| 0 | Q9D8P5  | UMP-CMP kinase                                                                            |
| 0 | Q54825  | Bystin                                                                                    |
| 0 | Q8R8P0  | IQ calmodulin-binding motif-containing protein 1                                          |
| 0 | Q62186  | Translocon-associated protein subunit delta                                               |
| 0 | Q66CQ19 | Nodal modulator 1                                                                         |
| 0 | Q92CL7  | MORF4 family-associated protein 1                                                         |
| 0 | Q9WU00  | Nuclear respiratory factor 1                                                              |
| 0 | Q7T513  | Serine/threonine-protein phosphatase 6 regulatory subunit 1                               |
| 0 | P06795  | Multidrug resistance protein 18/Multidrug resistance protein 1A                           |
| 0 | Q9R1K9  | Centrin-2                                                                                 |
| 0 | P62996  | Transformer-2 protein homolog beta                                                        |
| 0 | P70168  | Importin subunit beta-1                                                                   |
| 0 | Q66G75  | Phosphatidylglycerophosphatase and protein-tyrosine phosphatase 1                         |
| 0 | Q9EKF7  | Exportin-7                                                                                |
| 0 | Q9J1I7  | Ribonuclease inhibitor                                                                    |
| 0 | Q91405  | Protein transport protein Sec23A                                                          |
| 0 | Q8R5C5  | Beta-actinin                                                                              |
| 0 | P62315  | Small nuclear ribonucleoprotein Sm D1                                                     |
| 0 | Q3UH06  | Sorting nexin-27                                                                          |
| 0 | Q99M87  | DnaJ homolog subfamily A member 3, mitochondrial                                          |
| 0 | P61924  | Cotactin subunit zeta-1                                                                   |
| 0 | Q92Y22  | Tripartite motif-containing protein 59                                                    |
| 0 | Q991N2  | Kelch-like protein 22                                                                     |
| 0 | Q6P245  | Eukaryotic translation initiation factor 5A/Eukaryotic translation initiation factor 5A-1 |
| 0 | A2AAN8  | E3 ubiquitin-protein ligase UBR4                                                          |
| 0 | Q6P566  | UBX domain-containing protein 7                                                           |
| 0 | Q6D0D3  | Protein SCAF8                                                                             |
| 0 | Q9D0D5  | General transcription factor IIE subunit 1                                                |
| 0 | Q920R9  | Fatty acid desaturase 2                                                                   |
| 0 | Q640N1  | Adipocyte enhancer-binding protein 1                                                      |
| 0 | Q8R1U2  | Tetraspanin/Tetraspanin-9                                                                 |
| 0 | Q3TZX8  | Polynucleotide 5'-hydroxyl-kinase NOL9                                                    |
| 0 | Q9D7A8  | Armadio repeat-containing protein 1                                                       |
| 0 | Q9JY91  | DNA mismatch repair protein Mlh1                                                          |
| 0 | Q9QY73  | Transmembrane protein 59                                                                  |

|            |            |   |   |
|------------|------------|---|---|
|            | mmu:75751  |   |   |
| Atf7       |            |   |   |
| Bet1       | mmu:12068  |   |   |
| Clint1     |            |   |   |
| Ncln       |            |   |   |
| Psmd4      | mmu:19185  |   |   |
| Fip11      | mmu:66899  |   |   |
| Tbcl15     | mmu:66687  |   |   |
| Lsm4       | mmu:50783  |   |   |
| Bcs1l      | mmu:66821  |   |   |
| Ric8a      | mmu:101489 |   |   |
| Srsf3      | mmu:20383  |   |   |
| Ptpn23     | mmu:104831 | 1 |   |
| Naa10      | mmu:56292  |   |   |
| Smx5       | mmu:69178  |   |   |
| Rasa4      | mmu:54153  |   |   |
| Rpl38      | mmu:67671  |   | 1 |
| Hdac1,6m   | mmu:433759 |   |   |
| Slpr       | mmu:380773 |   |   |
| Arf1,Arf3  | mmu:11840  |   |   |
| Arhgap17   | mmu:70497  |   |   |
| Sntb2      | mmu:20650  |   |   |
| igsf8      | mmu:140559 |   |   |
| Rabgap1    | mmu:227800 |   |   |
| Spg20      | mmu:229285 |   |   |
| Copb2      | mmu:50797  |   |   |
| Gps1       | mmu:74451  |   |   |
| Pdzd8      | mmu:107368 |   |   |
| Sic16a1    | mmu:20501  | 1 |   |
| Prcb3      | mmu:11757  |   |   |
| Vps13c     | mmu:320528 |   |   |
| Ythdc1     | mmu:231386 |   |   |
| Parva      | mmu:57342  |   |   |
| Helb       | mmu:117599 |   |   |
| Gspt1      | mmu:14852  |   |   |
| Akap9      | mmu:100986 |   |   |
| Rras2      | mmu:66922  |   |   |
| Igf2bp2    | mmu:319765 |   |   |
| Hmnp1l     | mmu:72692  |   |   |
| Mstc1      | mmu:229524 |   |   |
| Rab3a      | mmu:19339  |   |   |
| Trmt1      | mmu:212528 |   |   |
| Timm50     | mmu:66525  | 1 |   |
| Hgh1       | mmu:59053  |   |   |
| Sh3glb2    | mmu:227700 |   |   |
| Ap1b1      | mmu:11764  |   |   |
| Tcof1      | mmu:21453  |   |   |
| Nelfe      | mmu:27632  |   |   |
| H13,Hm13   | mmu:14950  |   |   |
| Cops4      | mmu:26891  |   |   |
| Utp20      |            |   |   |
| Tubgcp2    | mmu:74237  |   |   |
| Ncbp1      | mmu:433702 |   |   |
| Ap3m1      | mmu:55946  |   |   |
| Itga5      | mmu:16402  |   |   |
| Lmbrd1     | mmu:68421  |   |   |
| Efr3a      | mmu:76740  |   |   |
| Rin1       | mmu:225870 |   |   |
| Trin33     | mmu:94093  |   | 1 |
| Spt130     | mmu:269043 |   |   |
| Rab7a      | mmu:19349  |   |   |
| Gps1       |            |   |   |
| Psm1a6     | mmu:26443  |   |   |
| Cope       | mmu:59042  |   |   |
| Btaf1      | mmu:107182 |   |   |
| Atp5j      | mmu:11957  |   |   |
| Vps53      | mmu:68299  |   |   |
| Ppp6r3     | mmu:52036  |   |   |
| Lnpep      | mmu:240028 |   |   |
| Dcaf5      | mmu:320808 | 1 |   |
| Arfge1     | mmu:211673 |   |   |
| Man1a1,M   | mmu:17155  |   |   |
| Tmf1       | mmu:232286 |   |   |
| Heat5b     | mmu:320473 |   |   |
| Ccdc88a    | mmu:108686 |   |   |
| Mirp9      | mmu:78523  |   |   |
| Surf2      | mmu:20931  |   |   |
| Antr2      | mmu:71914  |   |   |
| Cpsf6      | mmu:432508 |   |   |
| Lnp        | mmu:69605  |   |   |
| Tprg11,Tpr | mmu:67808  |   |   |
| Chmp2a     | mmu:68953  |   |   |
| Tssc4      | mmu:56844  |   |   |
| Xrcc1      | mmu:22594  |   |   |
| Psmd14     | mmu:59029  |   |   |
| Tpm1       |            |   |   |
| Ppp2r5c    | mmu:26931  |   |   |
| Rab8a      | mmu:17274  |   |   |
| Uba3       | mmu:22200  |   |   |
| Lmd1       | mmu:29806  |   |   |
| Bgat1      | mmu:108902 |   |   |
| Cmpk1      | mmu:66588  |   |   |
| Bysl       | mmu:53414  |   |   |
| lqcbl2     | mmu:320299 |   |   |
| Srsr4      | mmu:20832  |   |   |
| Nmof1      | mmu:211548 |   |   |
| Mromp1,6n  | mmu:67568  |   |   |
| Nrf1       | mmu:18181  |   |   |
| Ppp6r1     | mmu:243819 |   |   |
| Abcb1b,Ab  | mmu:18669  |   |   |
| Cate2      | mmu:26370  | 1 |   |
| Trab2      | mmu:20462  |   |   |
| Igknb1     | mmu:16211  |   |   |
| Ptgm1      | mmu:66461  |   | 1 |
| Xpo7       | mmu:65246  |   |   |
| Rnh1       | mmu:107702 |   |   |
| Sect3a     | mmu:20334  |   |   |
| Actr1b     | mmu:226977 |   |   |
| Snrpd1     | mmu:20641  |   |   |
| Snx27      | mmu:76742  |   |   |
| Dnaaj3     | mmu:83945  |   |   |
| Cop1       | mmu:56447  |   |   |
| Trim59     | mmu:66949  |   |   |
| Kif125     | mmu:224023 |   | 1 |
| Elf5a      | mmu:276770 |   |   |
| Ubr4       | mmu:69116  |   | 1 |
| Ubxen7     |            |   |   |
| Sca8       | mmu:106583 |   |   |
| Gt2e1      | mmu:74197  |   |   |
| Fads2      | mmu:56473  |   |   |
| Aebp1      | mmu:11568  |   |   |
| Tspan9     | mmu:109246 |   |   |
| Nol9       | mmu:74035  |   |   |
| Armc1      | mmu:74252  |   |   |
| Mlh1       | mmu:17350  |   |   |
| Tmem59     | mmu:56374  |   |   |

|      |         |         |        |
|------|---------|---------|--------|
| 2762 | 0.2867  | 0.8577  | 0.3196 |
| 2763 | 2.4139  | 0.9034  | 0.3199 |
| 2764 | -1.0672 | 0.2345  | 0.3211 |
| 2765 | -0.0175 | 0.2698  | 0.3226 |
| 2766 | 0.6446  | 0.1818  | 0.3230 |
| 2767 | -0.0786 | 0.8532  | 0.3234 |
| 2768 | -0.0988 | 0.8798  | 0.3240 |
| 2769 | 0.4106  | -0.3619 | 0.3247 |
| 2770 | 0.0952  | 0.6530  | 0.3253 |
| 2771 | 0.4240  | 0.5886  | 0.3261 |
| 2772 | 0.5143  | 0.3779  | 0.3273 |
| 2773 | -0.0918 | 0.0537  | 0.3280 |
| 2774 | 0.6849  | 0.0960  | 0.3311 |
| 2775 | 0.6063  | -0.4987 | 0.3313 |
| 2776 | -0.2535 | 0.8085  | 0.3322 |
| 2777 | 0.2045  | -0.3465 | 0.3327 |
| 2778 | -0.0548 | 0.8788  | 0.3333 |
| 2779 | 0.4341  | 1.0238  | 0.3339 |
| 2780 | 0.3889  | 0.3246  | 0.3337 |
| 2781 | -0.3556 | 0.0723  | 0.3341 |
| 2782 | -0.2253 | -0.1231 | 0.3343 |
| 2783 | 0.0940  | 0.5610  | 0.3347 |
| 2784 | -0.6268 | 1.2601  | 0.3352 |
| 2785 | -0.1030 | 0.1838  | 0.3357 |
| 2786 | 0.2166  | -0.2815 | 0.3374 |
| 2787 | 0.0938  | -0.4785 | 0.3377 |
| 2788 | 0.1640  | 1.2372  | 0.3379 |
| 2789 | 1.0260  | 0.5801  | 0.3384 |
| 2790 | -0.3874 | 0.9877  | 0.3398 |
| 2791 | -0.8083 | 0.4324  | 0.3405 |
| 2792 | -0.1153 | 0.1501  | 0.3408 |
| 2793 | 0.2195  | -0.1431 | 0.3414 |
| 2794 | -0.2768 | 0.1019  | 0.3420 |
| 2795 | 0.5065  | -0.1237 | 0.3447 |
| 2796 | 0.4932  | -0.4524 | 0.3455 |
| 2797 | -0.4689 | 0.3498  | 0.3462 |
| 2798 | -0.4924 | 0.7078  | 0.3465 |
| 2799 | -0.7009 | 0.6560  | 0.3469 |
| 2800 | 0.2688  | -0.1544 | 0.3478 |
| 2801 | 0.0784  | 0.3331  | 0.3483 |
| 2802 | 0.7291  | 0.1549  | 0.3491 |
| 2803 | 0.3095  | 0.0534  | 0.3520 |
| 2804 | -0.2968 | 0.8599  | 0.3531 |
| 2805 | -1.2000 | -0.2611 | 0.3535 |
| 2806 | -0.2726 | 0.7818  | 0.3539 |
| 2807 | -0.6478 | -0.7772 | 0.3540 |
| 2808 | -0.3064 | -0.0789 | 0.3547 |
| 2809 | -0.1432 | -0.0948 | 0.3573 |
| 2810 | -0.2779 | -0.3694 | 0.3587 |
| 2811 | -0.2275 | 0.7068  | 0.3589 |
| 2812 | -0.2571 | -0.0678 | 0.3601 |
| 2813 | -0.2175 | -0.0707 | 0.3612 |
| 2814 | -0.2797 | 0.1055  | 0.3618 |
| 2815 | 0.9766  | 0.2274  | 0.3631 |
| 2816 | -0.3381 | -0.1051 | 0.3645 |
| 2817 | -0.3998 | 0.0988  | 0.3654 |
| 2818 | -0.2188 | -0.1007 | 0.3658 |
| 2819 | -0.1306 | -0.4719 | 0.3663 |
| 2820 | -2.3229 | 0.8747  | 0.3663 |
| 2821 | 0.1824  | -0.0405 | 0.3665 |
| 2822 | 0.5052  | -0.1055 | 0.3667 |
| 2823 | 0.0823  | -0.8156 | 0.3672 |
| 2824 | 1.0789  | 0.1895  | 0.3685 |
| 2825 | -0.5132 | 0.0938  | 0.3689 |
| 2826 | -0.0888 | 0.2576  | 0.3691 |
| 2827 | -0.1358 | -0.4182 | 0.3705 |
| 2828 | 0.6381  | -0.6028 | 0.3721 |
| 2829 | 0.2229  | 0.7344  | 0.3740 |
| 2830 | 0.4346  | 0.4912  | 0.3755 |
| 2831 | 0.5054  | -0.6244 | 0.3758 |
| 2832 | -1.1106 | -0.2215 | 0.3763 |
| 2833 | 0.6168  | 0.5032  | 0.3765 |
| 2834 | 0.1485  | -0.1503 | 0.3768 |
| 2835 | 0.5505  | 1.1051  | 0.3789 |
| 2836 | 0.2401  | 0.1622  | 0.3772 |
| 2837 | 0.4047  | 0.8325  | 0.3771 |
| 2838 | 0.3643  | -0.1615 | 0.3779 |
| 2839 | 0.4057  | 0.2857  | 0.3783 |
| 2840 | 0.2140  | 0.6406  | 0.3807 |
| 2841 | 0.7825  | -0.3736 | 0.3842 |
| 2842 | 0.8340  | 0.5870  | 0.3847 |
| 2843 | 0.1674  | -0.5377 | 0.3850 |
| 2844 | -0.2329 | -0.1423 | 0.3869 |
| 2845 | 0.3160  | -0.1806 | 0.3879 |
| 2846 | -0.0598 | -0.0871 | 0.3883 |
| 2847 | -0.3515 | -0.3982 | 0.3883 |
| 2848 | 1.2332  | -0.4518 | 0.3916 |
| 2849 | -0.0588 | 0.8417  | 0.3918 |
| 2850 | 0.2262  | -0.2206 | 0.3920 |
| 2851 | -0.3433 | 0.7505  | 0.3936 |
| 2852 | 0.0311  | 0.2455  | 0.3939 |
| 2853 | -0.3167 | 0.1833  | 0.3960 |
| 2854 | 0.4834  | 0.8175  | 0.3982 |
| 2855 | -0.1625 | 0.3788  | 0.3992 |
| 2856 | -2.3227 | -0.1877 | 0.4011 |
| 2857 | -0.6142 | 0.0028  | 0.4026 |
| 2858 | -0.2484 | 0.9139  | 0.4036 |
| 2859 | -0.1245 | 2.2587  | 0.4048 |
| 2860 | 0.2535  | -0.0546 | 0.4050 |
| 2861 | -0.1350 | 0.8694  | 0.4057 |
| 2862 | 0.1874  | 0.2539  | 0.4058 |
| 2863 | 0.1325  | 0.3954  | 0.4090 |
| 2864 | 0.8639  | -0.5385 | 0.4096 |
| 2865 | 1.0127  | -1.4588 | 0.4099 |
| 2866 | 0.1927  | -0.4193 | 0.4103 |
| 2867 | 0.2480  | -0.4147 | 0.4147 |
| 2868 | 0.7498  | -0.2645 | 0.4151 |
| 2869 | -0.5089 | -0.3229 | 0.4134 |
| 2870 | -0.1098 | -0.2963 | 0.4169 |
| 2871 | -0.8346 | 0.4075  | 0.4197 |
| 2872 | -0.0940 | 1.7095  | 0.4199 |
| 2873 | 0.7152  | 0.7724  | 0.4204 |
| 2874 | 0.2257  | -0.1339 | 0.4226 |
| 2875 | 1.5690  | -0.1545 | 0.4227 |
| 2876 | -0.2579 | 0.3794  | 0.4230 |
| 2877 | -0.1168 | 0.4738  | 0.4231 |
| 2878 | -0.5737 | -0.2688 | 0.4231 |
| 2879 | -1.3235 | -0.1523 | 0.4241 |
| 2880 | -1.0375 | 2.0066  | 0.4246 |
| 2881 | -0.1266 | 0.6197  | 0.4270 |
| 2882 | -0.1157 | 0.3659  | 0.4301 |
| 2883 | -1.3050 | 0.1490  | 0.4336 |
| 2884 | -0.7477 | 0.8180  | 0.4347 |
| 2885 | 0.2498  | 0.1708  | 0.4351 |
| 2886 | 0.6394  | 0.5272  | 0.4364 |
| 2887 | 0.5915  | 0.4424  | 0.4365 |

|        |                                                                                                           |            |               |
|--------|-----------------------------------------------------------------------------------------------------------|------------|---------------|
| Q8K012 | Formin-binding protein 1-like                                                                             | Fbnp1l     |               |
| Q9D1M0 | Protein SEC13 homolog                                                                                     | Sec13      | mmu:110379    |
| A8Y5H7 |                                                                                                           | Sec14l1    | mmu:74136     |
| Q8B0W7 | Protein LYRIC                                                                                             | Mtdh       | mmu:67154     |
| O08543 | COP9 signalosome complex subunit 3                                                                        | Cop3       | mmu:26572     |
| Q5ZKX8 | Serine/arginine repetitive matrix protein 1                                                               | Srrm1      | mmu:51796     |
| Q9D0C3 | Cap-specific mRNA (nucleoside-2'-O-)-methyltransferase 1                                                  | Cmt1r      | mmu:74157     |
| Q9D062 | Protein transport protein Sec23b                                                                          | Sec23b     | mmu:27054     |
| P97287 | Induced myeloid leukemia cell differentiation protein Mcl-1 homolog                                       | Mcl1       | mmu:17210     |
| Q9CQU1 | Microfibrillar-associated protein 1                                                                       | Mfap1      | mmu:67532     |
| Q6ZW22 | Ubiquitin-conjugating enzyme E2 R2                                                                        | Ube2r2     | mmu:67615     |
| Q9JIG8 | PRA1 family protein 2                                                                                     | Praf2      | mmu:54637     |
| P61022 | Calneurin B homologous protein 1                                                                          | Chp1       | mmu:56398     |
| E9Q987 |                                                                                                           | Kidins220  | mmu:77480     |
| Q60838 | Segment polarity protein dishevelled homolog DVL-2                                                        | Dvl2       | mmu:13543     |
| Q8CF12 | Ubiquitin-conjugating enzyme E2 R1                                                                        | Cdc34      | mmu:216150    |
| P97379 | Ras GTPase-activating protein-binding protein 2                                                           | G3bp2      | mmu:23881     |
| Q92381 | Lariat debranching enzyme                                                                                 | Dbr1       | mmu:83703     |
| Q8C407 | Protein YIP4                                                                                              | Yip4       | mmu:67864     |
| P49586 | Choline-phosphate cytidyltransferase A                                                                    | Pcyt1a     | mmu:13026     |
| Q35598 | Disintegrin and metalloproteinase domain-containing protein 10                                            | Adam10     | mmu:11487     |
| Q9D071 | MMS19 nucleotide excision repair protein homolog                                                          | Mms19      | mmu:72199     |
| P62897 | Cytochrome c, somatic                                                                                     | Cycs       | mmu:13063     |
| P05213 | Tubulin alpha-18 chain                                                                                    | Tuba1b     | mmu:22143     |
| P57080 | Ubiquitin carboxyl-terminal hydrolase Z5                                                                  | Usp25      | mmu:30940     |
| Q8H696 | ATP-dependent Clp protease proteolytic subunit, mitochondrial                                             | Clp        | mmu:53895     |
| Q8HKT7 | THO complex subunit 5 homolog                                                                             | Thoc5      | mmu:107829    |
| P70257 | Nuclear factor 1; Nuclear factor 1 X-type                                                                 | Nfya       | mmu:18032     |
| P11881 | Inositol 1,4,5-trisphosphate receptor type 1                                                              | Itpr1      | mmu:16438     |
| Q00422 | GA-binding protein alpha chain                                                                            | Gabpa      | mmu:14390     |
| P10923 | Osteopontin                                                                                               | Spp1       | mmu:20750     |
| Q9D379 | Epoxide hydrolase 1                                                                                       | Ephx1      | mmu:13849     |
| Q9Z0L0 | Trophoblast glycoprotein                                                                                  | Tpbp       | mmu:21983     |
| Q60865 | Caprin-1                                                                                                  | Caprin1    | mmu:53872     |
| Q89110 | Caspase-8;Caspase-8 subunit p18;Caspase-8 subunit p10                                                     | Casp8      | mmu:12370     |
| Q09172 | Glutamate--cysteine ligase regulatory subunit                                                             | Gclm       | mmu:14630     |
| Q91YV3 | Dnal homolog subfamily C member 3                                                                         | Dnajc3     | mmu:100037258 |
| P60904 | Dnal homolog subfamily C member 5                                                                         | Dnajc5     | mmu:13002     |
| R2R8E7 | OTU domain-containing protein 4                                                                           | Otu4       | mmu:73945     |
| P48453 | Serine/threonine-protein phosphatase;Serine/threonine-protein phosphatase 2B catalytic subunit            | Ppp3cb     | mmu:19056     |
| Q88X02 | KN motif and ankyrin repeat domain-containing protein 2                                                   | Kank2      | mmu:235041    |
| Q6Z038 | Cullin-associated NEDD8-dissociated protein 1                                                             | Cand1      | mmu:71902     |
| Q88LN5 | Lanosterol synthase                                                                                       | Lss        | mmu:16987     |
| Q8B0L7 | Protein MON2 homolog                                                                                      | Mon2       | mmu:67074     |
| Q9CQE3 | 28S ribosomal protein S17, mitochondrial                                                                  | Mrps17     | mmu:66258     |
| Q9CQJ8 | 28S ribosomal protein S36, mitochondrial                                                                  | Mrps36     | mmu:66128     |
| Q8CPC0 | Nuclear export mediator factor Nxf1                                                                       | Nxf1       | mmu:66244     |
| Q9CQV7 | 39S ribosomal protein L41, mitochondrial                                                                  | Nrpl41     | mmu:107733    |
| Q6ZQJ8 | Nucleoporin NUP188 homolog                                                                                | Nup188     | mmu:227699    |
| P51125 | Calpastatin                                                                                               | Cast       | mmu:12380     |
| Q88Y71 | Histone acetyltransferase type B catalytic subunit                                                        | Hat1       | mmu:107435    |
| Q8V8T0 | Thioredoxin-related transmembrane protein 1                                                               | Tmx1       | mmu:72736     |
| Q61739 | Integrin alpha-6;Integrin alpha-6 heavy chain;Integrin alpha-6 light chain                                | Itga6      | mmu:16403     |
| Q91XC0 | LIM domain-containing protein ajuba                                                                       | Ajuba      | mmu:16475     |
| Q70311 | Glycylpeptide N-tetradecanoyltransferase 2;Glycylpeptide N-tetradecanoyltransferase                       | Nmt2       | mmu:18108     |
| Q4V4A2 | Protein CDV3                                                                                              | Cdv3       | mmu:321022    |
| Q88R89 | Coiled-coil and C2 domain-containing protein 1B                                                           | C22d1b     | mmu:319965    |
| Q9P9U6 | Putative ATP-dependent RNA helicase DHX30                                                                 | Dhx30      | mmu:72831     |
| Q6Z0M6 | Serum paraoxonase/arylesterase 2                                                                          | Pon2       | mmu:330260    |
| Q8VQD0 | NAD-dependent protein deacetylase sirtuin-2                                                               | Sirt2      | mmu:64383     |
| Q9WV92 | Band 4.1-like protein 3;Band 4.1-like protein 3, N-terminally processed                                   | Epb41i3    | mmu:13823     |
| Q6Z422 | Osteoclast-stimulating factor 1                                                                           | Ostf1      | mmu:20409     |
| Q8B0J5 | Ubiquitin-protein ligase E3C                                                                              | Ube3c      | mmu:100763    |
| Q9Z199 | Transcription elongation factor SPT4;B;Transcription elongation factor SPT4-A                             | Supt4hb;1  | mmu:100041294 |
| Q61411 | GTPase HRas;GTPase HRas, N-terminally processed                                                           | Hras       | mmu:15461     |
| Q9CWN6 | PRKR-interacting protein 1                                                                                | Pkrrip1    | mmu:66801     |
| Q5ZC85 | Nuclear speckle splicing regulatory protein 1                                                             | Nrspl1     | mmu:237859    |
| Q9CQV9 | Multifunctional methyltransferase subunit TRM112-like protein                                             | Ntrm12     | mmu:67674     |
| Q4VBE8 | WD repeat-containing protein 18                                                                           | Wdr18      | mmu:216156    |
| P17439 | Glucosylceramidase                                                                                        | Gba        | mmu:14466     |
| A6H8H2 | DENN domain-containing protein 4C                                                                         | Dennd4c    | mmu:329877    |
| Q04692 | SWI/SNF-related matrix-associated actin-dependent regulator of chromatin subfamily A containing 5         | Smardc1    | mmu:13990     |
| Q9D085 | Alpha-soluble NSF attachment protein                                                                      | Napa       | mmu:108124    |
| Q8CBY3 | Leukocyte receptor cluster member 8 homolog                                                               | Leng8      | mmu:232798    |
| A2R5S4 | UHRF1-binding protein 1-like                                                                              | Uhrf1bpl1  | mmu:75089     |
| Q9D890 | Protein SMG9                                                                                              | Smg9       | mmu:71997     |
| P68372 | Tubulin beta-4B chain;Tubulin beta-4A chain                                                               | Tubb4b;Tb  | mmu:227613    |
| Q8B6K6 | Y4L amino acid transporter 2                                                                              | Slc7a6     | mmu:330836    |
| Q9ZDH3 | SWI/SNF-related matrix-associated actin-dependent regulator of chromatin subfamily B member 1             | Smardc1    | mmu:20587     |
| Q64008 | Ras-related protein Rab-34                                                                                | Rab34      | mmu:19376     |
| Q9ET30 | Transmembrane 9 superfamily member 3                                                                      | Tm9sf3     | mmu:107358    |
| Q8R0A0 | General transcription factor IIF subunit 2                                                                | Gtf2f2     | mmu:68705     |
| A2ASR2 | Brefeldin A-inhibited guanine nucleotide-exchange protein 2                                               | Argef2     | mmu:99371     |
| Q9CXG3 | Peptidyl-prolyl cis-trans isomerase-like 4                                                                | Ppi4       | mmu:67418     |
| P99024 | Tubulin beta-5 chain                                                                                      | Tubb5      | mmu:22154     |
| Q91WQ3 | Tyrosine--tRNA ligase;Tyrosine--tRNA ligase, cytoplasmic;Tyrosine--tRNA ligase, cytoplasmic, N-ten Yars   | Yars       | mmu:107271    |
| Q8CIG8 | Protein arginine N-methyltransferase 5                                                                    | Pnmt5      | mmu:27374     |
| Q8R480 | Nuclear pore complex protein Nup85                                                                        | Nup85      | mmu:445007    |
| Q9N9C3 | NADH dehydrogenase [ubiquinone] 1 alpha subcomplex subunit 10, mitochondrial                              | Ndufa10    | mmu:67273     |
| Q9CQF3 | Cleavage and polyadenylation specificity factor subunit 5                                                 | Nudt21     | mmu:68219     |
| A54984 | ATPase Asna1                                                                                              | Asna1      | mmu:56495     |
| Q3UM29 | Conserved oligomeric Golgi complex subunit 7                                                              | Cog7       | mmu:233824    |
| Q3TVC7 | Cyclin-D1-binding protein 1                                                                               | Ccndb1     | mmu:17151     |
| P51859 | Hepatoma-derived growth factor                                                                            | Hdgf       | mmu:15191     |
| Q9WU29 | Ectonucleoside triphosphate diphosphohydrolase 5                                                          | Entpd5     | mmu:12499     |
| Q8B551 | Mitochondrial Rho GTPase 1                                                                                | Rho1       | mmu:59040     |
| Q6VNB8 | WD repeat and FYVE domain-containing protein 3                                                            | Wdfy3      | mmu:72145     |
| P72349 | Zinc finger protein 36, C3H1 type-like 2                                                                  | Zfp362     | mmu:12193     |
| Q8BQM4 | HEAT repeat-containing protein 3                                                                          | Heatr3     | mmu:234549    |
| Q53236 | Serine/arginine-rich splicing factor 5                                                                    | Srsf5      | mmu:20384     |
| Q9J139 | ATP-binding cassette sub-family B member 10, mitochondrial                                                | Abcb10     | mmu:56199     |
| Q01768 | Nucleoside diphosphate kinase;Nucleoside diphosphate kinase B;Nucleoside diphosphate kinase A             | Gim20390;1 | mmu:18103     |
| Q88448 | Kinesin light chain 2                                                                                     | Klc2       |               |
| P62204 | Calmodulin                                                                                                | Calm1      | mmu:12313     |
| Q8BHN3 | Neutral alpha-glucosidase AB                                                                              | Ganab      | mmu:14376     |
| Q8C2F9 | Bromodomain-containing protein 3                                                                          | Brd3       | mmu:67382     |
| Q9ECQ9 | Protein O-GlcNAcase                                                                                       | Mgea5      | mmu:76055     |
| Q8BTT6 | Digestive organ expansion factor homolog                                                                  | Dioxf      | mmu:215193    |
| Q91V92 | ATP synthase subunit gamma;ATP synthase subunit gamma, mitochondrial                                      | Atp5c1     | mmu:11949     |
| P11103 | Poly (ADP-ribose) polymerase 1                                                                            | Parp1      |               |
| Q8CIV2 | Membralin                                                                                                 | Tmem259    | mmu:216157    |
| Q9C9V7 | RNA polymerase II subunit A C-terminal domain phosphatase SSU72                                           | Ssu72      | mmu:68991     |
| Q9Z2F4 | Tubulin beta-6 chain                                                                                      | Tubb6      | mmu:67951     |
| Q8K4Q0 | Regulatory-associated protein of mTOR                                                                     | Rptor      |               |
| P01895 | H-2 class I histocompatibility antigen, D-D alpha chain                                                   | H2-D1      |               |
| E9Q4X2 |                                                                                                           | Uggt2      | mmu:66435     |
| Q9CY94 | DNA replication complex GINS protein PSF3                                                                 | Gins3      | mmu:78833     |
| Q8R3P7 | Clusterin-associated protein 1                                                                            | Cluap1     | mmu:76779     |
| Q8W0W0 | Serine/threonine-protein phosphatase 1 regulatory subunit 10                                              | Ppp1r10    | mmu:52040     |
| Q9D6U8 | Protein FAM162A                                                                                           | Fam162a    | mmu:70186     |
| P40336 | Vacuolar protein sorting-associated protein 26A                                                           | Vps26a     | mmu:30930     |
| P28574 | Protein max                                                                                               | Max        |               |
| Q91VH6 | Protein MEMO1                                                                                             | Memo1      | mmu:76890     |
| P68033 | Actin, alpha cardiac muscle 1;Actin, gamma-enteric smooth muscle;Actin, alpha skeletal muscle;Actin1;Actg | Act1;Actg  | mmu:11464     |
| Q6QDQ6 | E3 ubiquitin-protein ligase Rnf220                                                                        | Rnf220     | mmu:66743     |
| Q8V8Z3 | Cleft lip and palate transmembrane protein 1 homolog                                                      | Cleftp1    | mmu:56457     |

|      |         |         |         |          |
|------|---------|---------|---------|----------|
| 2888 | -0.1142 | -0.3378 | -0.1709 | -0.4992  |
| 2889 | -1.4705 | -0.8917 | -0.2620 | -0.4401  |
| 2890 | -0.4499 | -0.7254 | -0.4810 | -0.4411  |
| 2891 | -1.4628 | -0.3534 | -3.6455 | -0.4414  |
| 2892 | -0.5806 | -1.3969 | -0.3337 | -0.4447  |
| 2893 | -0.6427 | -0.1656 | -0.2527 | -0.4452  |
| 2894 | -0.1334 | -0.6439 | -0.0889 | -0.4464  |
| 2895 | -0.6533 | -0.3750 | -0.5264 | -0.4447  |
| 2896 | -0.1935 | -1.1188 | -0.7264 | -0.4447  |
| 2897 | -0.2095 | -0.3582 | -0.1334 | -0.4451  |
| 2898 | -0.2640 | -0.7450 | -0.4554 | -0.4460  |
| 2899 | -1.0126 | -0.9363 | -0.9363 | -0.4460  |
| 2900 | -0.8861 | -0.8138 | -1.2605 | -0.4464  |
| 2901 | -0.3012 | -0.3032 | -0.3032 | -0.4498  |
| 2902 | -0.1347 | -0.4203 | -0.5518 | -0.4506  |
| 2903 | -0.2090 | -0.4846 | -0.4085 | -0.4538  |
| 2904 | -0.1613 | -0.7245 | -0.1423 | -0.4531  |
| 2905 | -0.2256 | -0.3381 | -0.1515 | -0.4527  |
| 2906 | -0.2098 | -0.2098 | -0.4023 | -0.4528  |
| 2907 | -0.0951 | -0.6560 | -0.2863 | -0.4530  |
| 2908 | -0.1691 | -0.1002 | -0.5401 | -0.4579  |
| 2909 | -1.2871 | -0.4750 | -0.5707 | -0.4599  |
| 2910 | -0.2270 | -1.4637 | -0.4253 | -0.4654  |
| 2911 | -0.2707 | -0.1289 | -0.3421 | -0.4663  |
| 2912 | -0.7969 | -0.3111 | -0.7147 | -0.4685  |
| 2913 | -0.3015 | -0.5775 | -0.4675 | -0.4675  |
| 2914 | -0.2778 | -1.1581 | -0.1753 | -0.4685  |
| 2915 | -0.8238 | -0.1355 | -0.8704 | -0.4714  |
| 2916 | -3.3170 | -3.6184 | -2.6050 | -0.4720  |
| 2917 | -0.5872 | -0.3721 | -0.0471 | -0.4735  |
| 2918 | -0.2104 | -0.1623 | -0.9682 | -0.4744  |
| 2919 | -0.2048 | -0.1914 | -0.0794 | -0.4756  |
| 2920 | -0.1870 | -1.4753 | -0.6067 | -0.4785  |
| 2921 | -0.5087 | -0.5747 | -0.8058 | -0.4805  |
| 2922 | -0.1372 | -0.2434 | -0.4831 | -0.4831  |
| 2923 | -0.5130 | -0.2380 | -0.3705 | -0.4835  |
| 2924 | -0.4474 | -0.4839 | -0.4839 | -0.4839  |
| 2925 | -0.4674 | -0.1501 | -0.4830 | -0.4830  |
| 2926 | -1.1354 | -0.3628 | -0.3218 | -0.4836  |
| 2927 | -0.5629 | -0.1211 | -0.4619 | -0.4844  |
| 2928 | -0.4044 | -0.3325 | -0.0681 | -0.4863  |
| 2929 | -0.4130 | -0.1436 | -0.3852 | -0.4866  |
| 2930 | -0.1325 | -0.2541 | -0.7923 | -0.4874  |
| 2931 | -0.0700 | -0.2998 | -0.4023 | -0.4876  |
| 2932 | -0.4064 | -0.4877 | -0.4579 | -0.4888  |
| 2933 | -0.2495 | -0.2652 | -0.7482 | -0.4887  |
| 2934 | -0.3806 | -0.0786 | -0.8584 | -0.4887  |
| 2935 | -0.9248 | -0.7051 | -1.9551 | -0.4907  |
| 2936 | -0.2163 | -0.4414 | -0.9562 | -0.4908  |
| 2937 | -1.9663 | -0.3586 | -0.3921 | -0.4916  |
| 2938 | -0.2025 | -0.9287 | -0.3158 | -0.4932  |
| 2939 | -0.2200 | -0.2987 | -0.0431 | -0.4945  |
| 2940 | -0.2619 | -0.2261 | -0.5007 | -0.4949  |
| 2941 | -0.4002 | -0.1658 | -0.1193 | -0.4972  |
| 2942 | -0.1476 | -0.7457 | -0.2940 | -0.4978  |
| 2943 | -0.3524 | -0.6188 | -0.4989 | -0.4989  |
| 2944 | -0.5389 | -0.1513 | -0.0840 | -0.4990  |
| 2945 | -0.4637 | -0.3507 | -1.0779 | -0.5002  |
| 2946 | -0.1197 | -0.4813 | -0.8148 | -0.5013  |
| 2947 | -0.2641 | -0.0471 | -0.4104 | -0.5016  |
| 2948 | -0.5603 | -0.6107 | -0.7782 | -0.5046  |
| 2949 | -0.2965 | -0.0481 | -0.3241 | -0.5109  |
| 2950 | -0.1485 | -0.1605 | -0.1618 | -0.5115  |
| 2951 | -0.0604 | -0.5062 | -0.3612 | -0.5198  |
| 2952 | -0.3608 | -0.1924 | -0.9920 | -0.5249  |
| 2953 | -0.1314 | -0.5594 | -0.4189 | -0.5288  |
| 2954 | -0.9679 | -0.8008 | -0.5281 | -0.5281  |
| 2955 | -0.4538 | -0.9779 | -0.9587 | -0.5259  |
| 2956 | -0.4403 | -0.5912 | -0.3238 | -0.5308  |
| 2957 | -0.2890 | -0.8203 | -0.2321 | -0.5312  |
| 2958 | -0.0411 | -0.0903 | -0.8322 | -0.5323  |
| 2959 | -0.0170 | -0.8117 | -0.0348 | -0.5368  |
| 2960 | -0.1164 | -0.5611 | -0.2905 | -0.5370  |
| 2961 | -0.3593 | -0.4557 | -0.0027 | -0.5372  |
| 2962 | -0.4798 | -0.1801 | -0.8275 | -0.5376  |
| 2963 | -0.2457 | -0.7955 | -0.5378 | -0.5378  |
| 2964 | -0.4419 | -0.5926 | -0.1367 | -0.5379  |
| 2965 | -0.6735 | -0.3744 | -0.3900 | -0.5394  |
| 2966 | -0.1463 | -0.4968 | -0.2381 | -0.5417  |
| 2967 | -0.0962 | -1.3501 | -0.5445 | -0.5445  |
| 2968 | -0.6120 | -0.3234 | -0.5473 | -0.5446  |
| 2969 | -0.9547 | -0.0091 | -0.2710 | -0.5448  |
| 2970 | -0.2846 | -0.1511 | -0.9009 | -0.5452  |
| 2971 | -0.5872 | -0.2134 | -0.2967 | -0.5489  |
| 2972 | -0.2226 | -0.1301 | -0.1829 | -0.5534  |
| 2973 | -0.4026 | -0.4320 | -0.4683 | -0.5538  |
| 2974 | -1.2358 | -0.8483 | -0.1595 | -0.5538  |
| 2975 | -0.4699 | -1.5660 | -0.3795 | -0.5594  |
| 2976 | -1.9977 | -0.0983 | -0.2321 | -0.5609  |
| 2977 | -1.0726 | -0.3888 | -2.3725 | -0.5654  |
| 2978 | -0.5095 | -0.1606 | -0.5671 | -0.5671  |
| 2979 | -0.1794 | -0.0541 | -1.0641 | -0.5710  |
| 2980 | -0.2808 | -0.3466 | -0.1375 | -0.5712  |
| 2981 | -1.9581 | -0.6470 | -0.7821 | -0.5722  |
| 2982 | -0.2972 | -0.7910 | -0.8984 | -0.5725  |
| 2983 | -0.4637 | -0.9415 | -0.1402 | -0.5746  |
| 2984 | -0.2722 | -0.8721 | -0.3004 | -0.5842  |
| 2985 | -0.1734 | -0.5876 | -0.7735 | -0.5850  |
| 2986 | -0.1325 | -0.3721 | -0.5854 | -0.5854  |
| 2987 | -0.1212 | -0.2570 | -0.8225 | -0.5904  |
| 2988 | -0.0990 | -0.6525 | -0.2210 | -0.5905  |
| 2989 | -0.2028 | -0.2325 | -0.9232 | -0.5910  |
| 2990 | -0.1316 | -0.1070 | -1.0858 | -0.5964  |
| 2991 | -0.3675 | -0.8710 | -0.6116 | -0.5998  |
| 2992 | -0.8435 | -0.1004 | -0.7288 | -0.6048  |
| 2993 | -1.1123 | -0.7028 | -0.3856 | -0.6095  |
| 2994 | -0.4188 | -2.0984 | -0.9310 | -0.61854 |
| 2995 | -0.3017 | -0.4028 | -0.3694 | -0.6122  |
| 2996 | -2.9125 | -0.2444 | -0.5586 | -0.6174  |
| 2997 | -0.4049 | -0.7945 | -0.7257 | -0.6218  |
| 2998 | -0.6420 | -0.9065 | -0.6239 | -0.6239  |
| 2999 | -0.2586 | -0.4144 | -0.1851 | -0.6253  |
| 3000 | -1.5427 | -0.2656 | -0.5940 | -0.6253  |
| 3001 | -0.2435 | -0.1757 | -0.3611 | -0.6305  |
| 3002 | -0.3324 | -0.0718 | -0.6273 | -0.6348  |
| 3003 | -0.5193 | -0.0415 | -1.5012 | -0.6381  |
| 3004 | -0.9749 | -0.3534 | -0.3534 | -0.6381  |
| 3005 | -0.2431 | -0.9832 | -1.5358 | -0.6441  |
| 3006 | -0.2981 | -2.3770 | -0.2539 | -0.6464  |
| 3007 | -1.0370 | -0.2904 | -0.6691 | -0.6691  |
| 3008 | -0.0908 | -0.6776 | -1.2068 | -0.6711  |
| 3009 | -1.0353 | -0.3643 | -0.5070 | -0.6779  |
| 3010 | -0.0917 | -0.3865 | -0.6845 | -0.6845  |
| 3011 | -0.5500 | -0.0933 | -0.3464 | -0.6885  |
| 3012 | -1.6014 | -0.1793 | -0.1039 | -0.6875  |
| 3013 | -1.0298 | -0.0965 | -0.2825 | -0.6984  |

|   |         |                                                                                                                  |
|---|---------|------------------------------------------------------------------------------------------------------------------|
| 0 | Q9W7X8  | Mitotic spindle assembly checkpoint protein MAD1                                                                 |
| 0 | A2B2E8  | Ribosomal biogenesis protein LAS1L                                                                               |
| 0 | Q8CH72  | E3 ubiquitin-protein ligase TRIM32                                                                               |
| 0 | Q8K271  | NmrA-like family domain-containing protein 1                                                                     |
| 0 | Q3TRM4  | Neurotrophin target esterase                                                                                     |
| 0 | P112467 | cAMP-dependent protein kinase type II-alpha regulatory subunit                                                   |
| 0 | S4R1D4  |                                                                                                                  |
| 0 | Q9D8N2  | Protein FAM45A                                                                                                   |
| 0 | P61358  | 60S ribosomal protein L27                                                                                        |
| 0 | Q3UDR8  | Protein YIPF3;Protein YIPF3, N-terminally processed                                                              |
| 0 | Q69257  | HBS1-like protein                                                                                                |
| 0 | Q61333  | Tumor necrosis factor alpha-induced protein 2                                                                    |
| 0 | Q61771  | Kinesin-like protein KIF3B;Kinesin-like protein KIF3B, N-terminally processed                                    |
| 0 | P97742  | Carnitine O-palmitoyltransferase 1, liver isoform                                                                |
| 0 | B1AY13  | Ubiquitin carboxyl-terminal hydrolase;Ubiquitin carboxyl-terminal hydrolase 24                                   |
| 0 | P16045  | Galelectin-1                                                                                                     |
| 0 | Q8C3Y4  | Kinetochore-associated protein 1                                                                                 |
| 0 | Q9D6N5  | Dr1-associated corepressor                                                                                       |
| 0 | Q09147  | Hsc70-interacting protein                                                                                        |
| 0 | Q8B9P7  | 60S ribosomal protein L24                                                                                        |
| 0 | P63328  | Serine/threonine-protein phosphatase 2B catalytic subunit alpha isoform                                          |
| 0 | Q65516  | Krev interaction trapped protein 1                                                                               |
| 0 | Q3T1X9  | U4/U6,US tri-snRNP-associated protein 2                                                                          |
| 0 | Q91W86  | Vacuolar protein sorting-associated protein 11 homolog                                                           |
| 0 | Q91W62  | Rab GTPase-binding effector protein 2                                                                            |
| 0 | Q782A7  | Nucleosome assembly protein 1-like 4                                                                             |
| 0 | P55120  | Histone-lysine N-methyltransferase 2A;MLL cleavage product N320;MLL cleavage product C180                        |
| 0 | Q92217  | Cytokine receptor-like factor 3                                                                                  |
| 0 | Q9D0R4  | Probable ATP-dependent RNA helicase DDX56                                                                        |
| 0 | Q88WU5  | Probable tRNA N6-adenosine threonylcarbamoyltransferase                                                          |
| 0 | P14901  | Heme oxygenase 1                                                                                                 |
| 0 | Q64105  | Sepiapterin reductase                                                                                            |
| 0 | G3X8X0  |                                                                                                                  |
| 0 | O88939  | Zinc finger and BTB domain-containing protein 7A                                                                 |
| 0 | Q9D0M3  | Cytochrome c1, heme protein, mitochondrial                                                                       |
| 0 | Q25K00  | Up-regulator of cell proliferation                                                                               |
| 0 | Q88W72  | Lysine-specific demethylase 4A                                                                                   |
| 0 | P52019  | Squalene monooxygenase                                                                                           |
| 0 | Q80UK0  | SEC14 domain and spectrin repeat-containing protein 1                                                            |
| 0 | Q8V0L4  | ADP-dependent glucokinase                                                                                        |
| 0 | Q8R1F1  | Niban-like protein 1                                                                                             |
| 0 | Q9D902  | General transcription factor IIE subunit 2                                                                       |
| 0 | Q9CQJ2  | PIH1 domain-containing protein 1                                                                                 |
| 0 | Q8VU16  | Splicing factor, proline- and glutamine-rich                                                                     |
| 0 | Q92ZV5  | Histone deacetylase 6                                                                                            |
| 0 | Q924K7  | Kinesin-like protein                                                                                             |
| 0 | P97740  | Serine/threonine-protein phosphatase 4 catalytic subunit                                                         |
| 0 | Q32K22  | Veazatin                                                                                                         |
| 0 | P724668 | Cation-dependent mannose-6-phosphate receptor                                                                    |
| 0 | Q61239  | Protein farnesyltransferase/geranylgeranyltransferase type-1 subunit alpha                                       |
| 0 | P770459 | ETS domain-containing transcription factor ERF                                                                   |
| 0 | Q9W717  | Unconventional myosin-1c                                                                                         |
| 0 | Q9WV80  | Sorting nexin-1                                                                                                  |
| 0 | T9Q137  |                                                                                                                  |
| 0 | Q62470  | Integrin alpha-3;Integrin alpha-3 heavy chain;Integrin alpha-3 light chain                                       |
| 0 | Q8C0H5  | Transcription initiation factor TFIIID subunit 10                                                                |
| 0 | Q8RGA0  | Protein phosphatase 1F                                                                                           |
| 0 | Q9WTK5  | Nuclear factor NF-kappa-B p100 subunit;Nuclear factor NF-kappa-B p52 subunit                                     |
| 0 | O88545  | COP9 signalosome complex subunit 6                                                                               |
| 0 | Q9D1N9  | 39S ribosomal protein L21, mitochondrial                                                                         |
| 0 | Q88YU6  | Torsin-1A-interacting protein 2                                                                                  |
| 0 | P56135  | ATP synthase subunit f, mitochondrial                                                                            |
| 0 | Q9D8H5  | Vesicular integral-membrane protein VIP36                                                                        |
| 0 | Q8K153  | Netrin receptor UNC5B                                                                                            |
| 0 | Q62077  | Phosphoinositide phospholipase C;1-phosphatidylinositol 4,5-bisphosphate phosphodiesterase gamma                 |
| 0 | Q64085  | Centrosomal protein of 170 kDa                                                                                   |
| 0 | Q9CQV1  | Mitochondrial import inner membrane translocase subunit TIM16                                                    |
| 0 | Q88M13  | Eukaryotic translation initiation factor 1A, X-chromosome;Eukaryotic translation initiation factor 1E;E1fAa;E1f1 |
| 0 | Q08749  | Dihydropyridyl dehydrogenase, mitochondrial                                                                      |
| 0 | Q8CHG7  | Rap guanine nucleotide exchange factor 2                                                                         |
| 0 | P56395  | Cytochrome b5                                                                                                    |
| 0 | Q61165  | Sodium/hydrogen exchanger 1                                                                                      |
| 0 | Q8VNC6  | CD99 antigen                                                                                                     |
| 0 | Q9QVJ0  | Dnai homolog subfamily A member 2                                                                                |
| 0 | Q61941  | NAD(P) transhydrogenase, mitochondrial                                                                           |
| 0 | Q8VCL2  | Protein SCO2 homolog, mitochondrial                                                                              |
| 0 | Q88746  | Target of Myb protein 1                                                                                          |
| 0 | Q8C0D4  | Rho GTPase-activating protein 12                                                                                 |
| 0 | P723198 | Chromobox protein homolog 3                                                                                      |
| 0 | Q8CC56  | Polyadenylate-binding protein 2                                                                                  |
| 0 | P35831  | Tyrosine-protein phosphatase non-receptor type 12                                                                |
| 0 | Q6D1D7  | Protein wntless homolog                                                                                          |
| 0 | Q61081  | Hsp90 co-chaperone Cdc37;Hsp90 co-chaperone Cdc37, N-terminally processed                                        |
| 0 | Q88052  | Microtubule-associated protein 15;MAP15 heavy chain;MAP15 light chain                                            |
| 0 | Q88A54  | Cleft lip and palate transmembrane protein 1-like protein                                                        |
| 0 | Q9CQJ7  | Integrator complex subunit 3                                                                                     |
| 0 | P113808 | Anion exchange protein 2                                                                                         |
| 0 | Q09131  | Glutathione S-transferase omega-1                                                                                |
| 0 | Q8R003  | Muscleblind-like protein 3                                                                                       |
| 0 | Q9QCE8  | UPF0568 protein C14orf166 homolog                                                                                |
| 0 | Q9D0C4  | Telomere length regulation protein TEL2 homolog                                                                  |
| 0 | Q8R0V1  | Leucine-rich repeat-containing protein 1                                                                         |
| 0 | P770670 | Nascent polypeptide-associated complex subunit alpha;Nascent polypeptide-associated complex x                    |
| 0 | Q3UJH60 | Disco-interacting protein 2 homolog B                                                                            |
| 0 | Q88653  | Regulator complex protein LAMTOR3                                                                                |
| 0 | Q7TTP0  | Integrator complex subunit 3                                                                                     |
| 0 | Q6G2T3  | Cullin-associated NEDD8-dissociated protein 2                                                                    |
| 0 | P19157  | Glutathione S-transferase P 1;Glutathione S-transferase P 2                                                      |
| 0 | Q8R5Y9  | Transportin-1                                                                                                    |
| 0 | Q8R4E2  | Rho guanine nucleotide exchange factor 12                                                                        |
| 0 | A2A2W8  | Rho guanine nucleotide exchange factor 10-like protein                                                           |
| 0 | E9QA86  |                                                                                                                  |
| 0 | P61226  | Ras-related protein Rap-2b                                                                                       |
| 0 | Q8W0V3  | Carbohydrate sulfotransferase 14                                                                                 |
| 0 | P797363 | Serine palmitoyltransferase 2                                                                                    |
| 0 | Q741105 | 60S ribosomal protein L28                                                                                        |
| 0 | P58R54  | Gamma-tubulin complex component 3                                                                                |
| 0 | Q78754  | Vacuolar ATPase assembly integral membrane protein Vma21                                                         |
| 0 | Q9D1A2  | Cytosolic non-specific dipeptidase                                                                               |
| 0 | Q00P19  | Heterogeneous nuclear ribonucleoprotein U-like protein 2                                                         |
| 0 | P81069  | GA-binding protein subunit beta-2                                                                                |
| 0 | P35922  | Fragile X mental retardation protein 1 homolog                                                                   |
| 0 | Q9D2V5  | Protein AAR2 homolog                                                                                             |
| 0 | O88622  | Poly(ADP-ribose) glycohydrolase                                                                                  |
| 0 | Q9D859  | Oxysterol-binding protein;Oxysterol-binding protein-related protein 3                                            |
| 0 | Q9U1C8  | Sacsin                                                                                                           |
| 0 | Q64337  | Sequestosome-1                                                                                                   |
| 0 | Q70310  | Glycylpeptide N-tetradecanoyltransferase 1                                                                       |
| 0 | Q92254  | cGMP-dependent 3,5-cyclic phosphodiesterase                                                                      |
| 0 | Q8K0C1  | Importin-13                                                                                                      |
| 0 | Q99K74  | Mediator of RNA polymerase II transcription subunit 24                                                           |
| 0 | G3UW40  |                                                                                                                  |
| 0 | Q9U1W9  | Ras-related protein Ral-B                                                                                        |
| 0 | Q9EQN3  | TSC22 domain family protein 4                                                                                    |
| 0 | Q882W8  | NHL repeat-containing protein 2                                                                                  |
| 0 | Q4F6K6  | Pre-mRNA-splicing factor 38A                                                                                     |

|             |             |
|-------------|-------------|
| Mad11l      | mmu:17120   |
| Las1l       | mmu:76130   |
| Trim32      | mmu:69807   |
| Nmr1a1      | mmu:67824   |
| Pnp1a6      | mmu:50767   |
| Pfkar2a     |             |
| Ppf1a1      |             |
| Fam5a5      | mmu:67894   |
| Rpl27       | mmu:19942   |
| Yipf3       | mmu:28064   |
| Hbs1l       | mmu:56422   |
| Tnfrap2     | mmu:21928   |
| Kif3b       | mmu:16569   |
| Cpt1a       | mmu:12894   |
| Usp24       | mmu:329908  |
| Lgals1      | mmu:16852   |
| Kntc1       | mmu:208628  |
| Str1        | mmu:66556   |
| Drc13       | mmu:70356   |
| Usp24       | mmu:329908  |
| Ppp3a       | mmu:19055   |
| Krt11       | mmu:79264   |
| Usp39       | mmu:28033   |
| Rabep2      | mmu:70314   |
| Nap14       | mmu:17955   |
| Kmt2a       | mmu:214162  |
| Crf3        | mmu:54394   |
| Ddx56       | mmu:52513   |
| Hspgp       | mmu:66246   |
| Hmx1        | mmu:15368   |
| Dh16        | mmu:69192   |
| Zbtb7a      | mmu:16669   |
| Cyc1        | mmu:66445   |
| Urgcp       | mmu:72046   |
| Kdm4a       | mmu:230674  |
| Se1e        | mmu:20775   |
| Ssd1        | mmu:228071  |
| Adg2        | mmu:72141   |
| Gtse2       | mmu:68153   |
| Ph1d1       | mmu:68845   |
| Sflq        | mmu:71514   |
| Kif13b      | mmu:15554   |
| Ppp4c       | mmu:56420   |
| Vezt        | mmu:215008  |
| Mfr         | mmu:17113   |
| Ntp1        | mmu:14722   |
| Yipf3       | mmu:28064   |
| Myo1c       | mmu:17913   |
| Sno1        | mmu:56440   |
| Tevx64      | mmu:21767   |
| Irga3       | mmu:16400   |
| Pt1f10.Gm4  | mmu:24075   |
| Ppm1f       | mmu:68606   |
| Nfb2        | mmu:18034   |
| Cops6       | mmu:26893   |
| Mpr21       | mmu:353242  |
| Tor1aip2    |             |
| Erf         | mmu:57421   |
| Lman2       | mmu:66890   |
| Unc5b       | mmu:107499  |
| Picg1       | mmu:66449   |
| Cep170      | mmu:66235   |
| Eif1a5.Eif1 | mmu:13382   |
| Dld         |             |
| Rapgef2     |             |
| Cy59        | mmu:69674   |
| Usp3a1      | mmu:20345   |
| Dna2a       | mmu:56445   |
| Nnt         |             |
| Sco2        | mmu:1001268 |
| Arhgap12    | mmu:75415   |
| Crbx3       |             |
| Pabpn1      | mmu:54196   |
| Ppn12       | mmu:19248   |
| Usp3a1      | mmu:20345   |
| Cdc37       | mmu:12539   |
| Map1s       | mmu:270058  |
| Cplm1t      | mmu:218335  |
| Btf3l4      | mmu:70533   |
| Slc4a2      | mmu:20535   |
| Gsto1       | mmu:14873   |
| Mbn13       | mmu:171170  |
| Telo2       | mmu:71718   |
| Nac         | mmu:20495   |
| Las1l       | mmu:76130   |
| Dlp2b       | mmu:239667  |
| Lamtor3     | mmu:56692   |
| Ints3       | mmu:229543  |
| Cand2       | mmu:67088   |
| Tsp1.Gstg   | mmu:14870   |
| Gtpo1       | mmu:238799  |
| Arhgef10    |             |
| Chc10       | mmu:72754   |
| Ppar1       | mmu:72351   |
| Nac         | mmu:20495   |
| Chc14       | mmu:72136   |
| Spic2t      | mmu:20773   |
| Rpl28       | mmu:19943   |
| Tubgcp3     | mmu:259279  |
| Vma21       | mmu:67048   |
| Cndp2       | mmu:66054   |
| Hnrnp12b    | mmu:68693   |
| Gabp2b      | mmu:213054  |
| Fmr1        | mmu:68295   |
| Parg        |             |
| Ospbl3      | mmu:71720   |
| Sacs        | mmu:50720   |
| Sqstm1      | mmu:18412   |
| Nmt1        | mmu:18107   |
| Pde2a       |             |
| Ipo13       | mmu:230673  |
| Med24       | mmu:23989   |
| Mcc         |             |
| Usp3a1      | mmu:64143   |
| Tsc22d4     | mmu:78829   |
| Nhr2c       | mmu:66866   |
| Prr38a      | mmu:230050  |



|      |         |         |         |         |
|------|---------|---------|---------|---------|
| 3014 | 0.0690  | 0.5383  | -0.0620 | 0.7012  |
| 3015 | 0.2400  | -0.1799 | -0.1331 | 0.7043  |
| 3016 | 0.4432  | -0.2753 | -0.5538 | 0.7052  |
| 3017 | 0.8742  | -0.3127 | -1.2245 | 0.7070  |
| 3018 | -0.0584 | -0.0000 | -0.7194 | 0.7094  |
| 3019 | 0.4150  | -0.0700 | -0.1523 | 0.7098  |
| 3020 | -0.0528 | 0.0994  | -0.0000 | 0.7161  |
| 3021 | -0.4651 | 0.2080  | -1.2247 | 0.7243  |
| 3022 | -0.3534 | 0.8545  | -1.3164 | 0.7245  |
| 3023 | -0.0410 | -0.3515 | -0.9101 | 0.7267  |
| 3024 | -0.2439 | 0.2718  | 0.0849  | 0.7324  |
| 3025 | 0.8397  | -0.1090 | 0.7595  | 0.7326  |
| 3026 | -0.0507 | -0.0407 | 0.6284  | 0.7384  |
| 3027 | 0.8593  | -0.0000 | -0.8881 | 0.7398  |
| 3028 | 0.3765  | -0.0580 | -0.7377 | 0.7480  |
| 3029 | -0.3888 | 0.1179  | -0.2832 | 0.7586  |
| 3030 | -0.2388 | 0.5720  | -0.4512 | 0.7587  |
| 3031 | -4.6375 | -0.4061 | -0.8357 | 0.7728  |
| 3032 | -0.2468 | 0.1329  | 0.6770  | 0.7750  |
| 3033 | 0.5513  | 0.7542  | -1.0297 | 0.7820  |
| 3034 | -0.2001 | 0.6180  | 1.4634  | 0.7951  |
| 3035 | 0.1308  | -0.0661 | 1.8577  | 0.8003  |
| 3036 | 0.4781  | -0.1888 | -0.4258 | 0.8087  |
| 3037 | 0.0622  | 0.7135  | -0.0868 | 0.8105  |
| 3038 | -0.0181 | 0.5072  | -0.3879 | 0.8271  |
| 3039 | -2.3861 | 0.7041  | -0.4254 | 0.8388  |
| 3040 | -0.0000 | 0.2462  | -0.2462 | 0.8451  |
| 3041 | 0.1980  | 1.9336  | -0.6963 | 0.8480  |
| 3042 | -2.5438 | 0.3045  | -1.3408 | 0.8807  |
| 3043 | -0.3810 | 0.3133  | -0.9807 | 0.8895  |
| 3044 | 0.3019  | -0.0000 | -0.0000 | 0.8941  |
| 3045 | 0.5817  | -0.0433 | -1.1767 | 0.8974  |
| 3046 | -0.0968 | 1.2754  | 0.8177  | 0.9035  |
| 3047 | -0.3304 | 1.7639  | 0.5066  | 0.9081  |
| 3048 | 0.3671  | -0.2037 | -0.1889 | 0.9093  |
| 3049 | -0.0000 | 0.6596  | 0.4087  | 0.9189  |
| 3050 | -0.0959 | 1.4448  | -1.5727 | 0.9260  |
| 3051 | -1.0875 | -0.3174 | -0.3235 | 0.9340  |
| 3052 | -0.2447 | -0.3213 | -0.9350 | 0.9350  |
| 3053 | -2.1715 | -0.0000 | -0.4820 | 0.9580  |
| 3054 | 0.1863  | -0.0000 | -2.0116 | 0.9614  |
| 3055 | -1.0332 | -0.9479 | -0.1077 | 0.9651  |
| 3056 | -0.6954 | -0.2363 | 1.9638  | 1.0248  |
| 3057 | 0.2318  | -0.3694 | 0.8082  | 1.0249  |
| 3058 | -0.7688 | 0.4348  | -0.0718 | 1.0291  |
| 3059 | -0.1599 | 0.5749  | -0.4240 | 1.0296  |
| 3060 | -0.2432 | 0.2877  | -0.8351 | 1.0388  |
| 3061 | -0.7968 | 0.6858  | -4.4343 | 1.0488  |
| 3062 | -0.1990 | 2.7520  | -0.9569 | 1.0538  |
| 3063 | -0.2253 | 1.4215  | -1.1540 | 1.0756  |
| 3064 | -0.3139 | 1.2659  | -0.1645 | 1.0808  |
| 3065 | -0.1733 | 1.0856  | -0.0530 | 1.1135  |
| 3066 | 0.3564  | -0.2306 | -0.0000 | 1.1228  |
| 3067 | 1.3348  | 1.7194  | -0.0950 | 1.1374  |
| 3068 | 1.6650  | -0.4127 | -0.1461 | 1.1640  |
| 3069 | 0.4680  | -0.5749 | -2.1788 | 1.1888  |
| 3070 | -1.1229 | -0.6368 | -0.1989 | 1.2151  |
| 3071 | -0.1831 | -1.0239 | -0.2188 | 1.3071  |
| 3072 | -0.4867 | 1.7669  | 2.1325  | 1.3171  |
| 3073 | -1.1778 | 0.0940  | 0.1018  | 1.4034  |
| 3074 | -0.1597 | 0.1093  | -0.8318 | 1.4260  |
| 3075 | -0.2139 | 0.5275  | -0.2023 | 1.5812  |
| 3076 | -0.9518 | 0.1599  | -0.5328 | 1.5938  |
| 3077 | 0.6600  | -1.1089 | -0.2229 | 1.6823  |
| 3078 | -0.4011 | -1.0416 | -0.0000 | -0.4726 |
| 3079 | -0.4150 | -0.2161 | -0.0000 | -0.2027 |
| 3080 | -0.5930 | -0.0000 | -0.0000 | -0.0849 |
| 3081 | 0.6148  | -0.2935 | -0.1794 | -0.0426 |
| 3082 | 1.4993  | -0.0856 | -1.0333 | 0.1169  |
| 3083 | 2.2733  | -0.4411 | -0.3197 | 0.5042  |
| 3084 | 1.3960  | 0.5083  | -0.1611 | 0.5811  |
| 3085 | -2.7247 | 0.0735  | -1.5969 | -1.4160 |
| 3086 | 0.1690  | -2.3199 | -1.3359 | -1.1623 |
| 3087 | 0.1057  | -0.7628 | -2.7694 | -1.1422 |
| 3088 | 0.3550  | -0.6774 | -2.1870 | -0.9029 |
| 3089 | -1.6748 | 0.2496  | -1.0873 | -0.8375 |
| 3090 | -0.1040 | 0.8091  | -0.2998 | -0.8353 |
| 3091 | -2.5277 | 1.7408  | -1.6439 | -0.8103 |
| 3092 | -1.2373 | 0.2417  | -1.2623 | -0.7523 |
| 3093 | -1.1571 | 1.1265  | -2.1920 | -0.7409 |
| 3094 | -2.2350 | -0.0610 | -0.0000 | -0.7345 |
| 3095 | -0.7327 | -1.4618 | 0.1061  | -0.6961 |
| 3096 | -0.9782 | -1.0596 | 0.1016  | -0.6454 |
| 3097 | -1.0318 | -0.0000 | -0.9069 | -0.6404 |
| 3098 | -0.1983 | -0.3940 | -1.9030 | -0.6398 |
| 3099 | -0.4422 | -1.2267 | -0.7885 | -0.6310 |
| 3100 | -1.5359 | -0.0942 | -1.6470 | -0.6296 |
| 3101 | 0.2245  | -1.2552 | -0.8335 | -0.6214 |
| 3102 | -0.6501 | -1.2403 | -0.6533 | -0.6145 |
| 3103 | 0.0807  | -0.1697 | -1.7203 | -0.6031 |
| 3104 | 0.3248  | -0.9552 | -1.1436 | -0.5913 |
| 3105 | -0.6129 | -1.2588 | -0.1797 | -0.5639 |
| 3106 | -0.8078 | 0.3177  | -1.2111 | -0.5604 |
| 3107 | -0.0000 | 0.4417  | -1.2340 | -0.5602 |
| 3108 | 0.3548  | -0.9499 | -1.0799 | -0.5583 |
| 3109 | 0.3818  | -1.1635 | -0.8732 | -0.5494 |
| 3110 | -1.6164 | -1.4124 | -1.8376 | -0.5445 |
| 3111 | -0.2644 | -1.7653 | -0.5000 | -0.5028 |
| 3112 | -0.1956 | 0.6361  | -1.9493 | -0.5029 |
| 3113 | -0.5681 | -1.4791 | 0.6164  | -0.4769 |
| 3114 | -1.2722 | -0.2358 | 0.0953  | -0.4709 |
| 3115 | -1.3431 | -0.0000 | -0.0738 | -0.4655 |
| 3116 | -0.2193 | -1.2069 | -0.0000 | -0.4618 |
| 3117 | -0.1692 | 0.6779  | -1.8880 | -0.4586 |
| 3118 | 0.3588  | -0.4087 | -1.2380 | -0.4294 |
| 3119 | 1.0070  | -0.9652 | -1.2609 | -0.4067 |
| 3120 | -0.4441 | -0.6962 | -3.6980 | -0.4042 |
| 3121 | -0.5376 | -1.1601 | -0.7703 | -0.3826 |
| 3122 | -0.5542 | -0.4943 | -1.1891 | -0.3764 |
| 3123 | -0.9503 | 0.2160  | -0.3770 | -0.3702 |
| 3124 | 0.1046  | -1.8494 | 0.6407  | -0.3680 |
| 3125 | -1.4327 | -0.8679 | -1.6638 | -0.3663 |
| 3126 | -1.3629 | 0.5961  | -0.2708 | -0.3459 |
| 3127 | -0.8818 | -0.2904 | 0.1437  | -0.3428 |
| 3128 | -0.6070 | -0.4204 | -0.0000 | -0.3406 |
| 3129 | -0.0540 | -0.8701 | -0.1759 | -0.3394 |
| 3130 | -0.3881 | -0.1005 | -0.3880 | -0.3257 |
| 3131 | -0.6856 | -0.7029 | -1.0013 | -0.3257 |
| 3132 | -0.1071 | -0.6205 | -0.4359 | -0.3194 |
| 3133 | -0.4941 | 1.0616  | -1.5219 | -0.3181 |
| 3134 | -0.2291 | -0.5881 | -0.5878 | -0.3156 |
| 3135 | -0.0000 | -0.0000 | -0.9459 | -0.3088 |
| 3136 | -0.5364 | 0.1223  | -0.4476 | -0.2872 |
| 3137 | -0.8965 | 0.1349  | -0.0988 | -0.2868 |
| 3138 | -0.6286 | 0.1810  | -0.4050 | -0.2843 |
| 3139 | -0.4860 | -0.3576 | -0.2728 | -0.2728 |

|   |         |                                                                                                      |
|---|---------|------------------------------------------------------------------------------------------------------|
| 0 | Q9EP69  | Phosphatidylinositol phosphatase SAC1                                                                |
| 0 | P35821  | Tyrosine-protein phosphatase non-receptor type 1                                                     |
| 0 | Q88FV2  | PCI domain-containing protein 2                                                                      |
| 0 | D320L8  |                                                                                                      |
| 0 | P15379  | CD44 antigen                                                                                         |
| 0 | Q35586  | COP9 signalosome complex subunit 5                                                                   |
| 0 | Q3UFX8  | FERM domain-containing protein 8                                                                     |
| 0 | Q08734  | Bcl-2 homologous antagonist/killer                                                                   |
| 0 | Q8K368  | Fanconi anemia group I protein homolog                                                               |
| 0 | Q9QC80  | Vacuolar protein-sorting-associated protein 25                                                       |
| 0 | P62862  | 40S ribosomal protein S30                                                                            |
| 0 | Q3U0N2  | Lysocardiolipin acyltransferase 1                                                                    |
| 0 | Q8R2R3  | Alpha- and gamma-adaptin-binding protein p34                                                         |
| 0 | Q35379  | Multidrug resistance-associated protein 1                                                            |
| 0 | Q09J30  | NAF1C2-interacting protein                                                                           |
| 0 | P61804  | Dolichyl-diphosphooligosaccharide--protein glycosyltransferase subunit DAD1                          |
| 0 | Q3TH56  | 5-adenosylmethionine synthase isoform type-2                                                         |
| 0 | Q90600  | DNA replication complex GINS protein PSF2                                                            |
| 0 | P84096  | Rho-related GTP-binding protein RhoG                                                                 |
| 0 | Q92136  | DNA-directed RNA polymerase III subunit RPC6                                                         |
| 0 | Q60520  | Paired amphipathic helix protein Sin3a                                                               |
| 0 | Q904F8  | Gamma-tubulin complex component 4                                                                    |
| 0 | P61166  | Transmembrane protein 258                                                                            |
| 0 | P48377  | MHC class II regulatory factor RFK1                                                                  |
| 0 | Q8VCK5  | Calcium uptake protein 1, mitochondrial                                                              |
| 0 | P8VPP8  |                                                                                                      |
| 0 | P47754  | F-actin-capping protein subunit alpha-2                                                              |
| 0 | A2AT37  |                                                                                                      |
| 0 | P61620  | Protein transport protein SecE1 subunit alpha isoform 1                                              |
| 0 | Q8C2A2  | tRNA-splicing endonuclease subunit Sen54                                                             |
| 0 | Q90C16  | Endoplasmic reticulum-Golgi intermediate compartment protein 1                                       |
| 0 | Q90XU1  | Amyloid beta A4 precursor protein-binding family B member 1                                          |
| 0 | Q9U1V6  | Bifunctional polynucleotide phosphatase/kinase;Polynucleotide 3-phosphatase;Polynucleotide 5'-Pnkp   |
| 0 | Q05A36  | RNA-binding E3 ubiquitin-protein ligase MEX3C;RNA-binding protein MEX3B;RNA-binding protein MEX3C;Me |
| 0 | Q9D7N9  | Adipocyte plasma membrane-associated protein                                                         |
| 0 | Q9D7N4  | GTP-loop GTPase 3                                                                                    |
| 0 | Q60650  | Killer cell lectin-like receptor 2                                                                   |
| 0 | Q9N970  | Ras-related GTP-binding protein C,Ras-related GTP-binding protein D                                  |
| 0 | Q80V26  | Inositol monophosphatase 3                                                                           |
| 0 | Q64310  | Surfeit locus protein 4                                                                              |
| 0 | Q9NVM3  | Anaphase-promoting complex subunit 7                                                                 |
| 0 | Q80808  | Protein diaphanous homolog 1                                                                         |
| 0 | P42227  | Signal transducer and activator of transcription 3;Signal transducer and activator of transcription  |
| 0 | Q92247  | Leptidyl-prolyl cis-trans isomerase FKBP9                                                            |
| 0 | P47753  | F-actin-capping protein subunit alpha-1                                                              |
| 0 | Q80717  | Lethal[2] giant larvae protein homolog 1                                                             |
| 0 | Q80HG3  | GRIP and coiled-coil domain-containing protein 2                                                     |
| 0 | P70460  | Vasodilator-stimulated phosphoprotein                                                                |
| 0 | Q88MK4  | Cytoskeleton-associated protein 4                                                                    |
| 0 | Q9D1C8  | Vacuolar protein sorting-associated protein 28 homolog                                               |
| 0 | Q9UJK2  | LanC-like protein 2                                                                                  |
| 0 | Q8K2V6  | Importin-11                                                                                          |
| 0 | P97370  | Sodium/potassium-transporting ATPase subunit beta-3                                                  |
| 0 | Q8K1Y8  | Vacuolar fusion protein CCZ1 homolog                                                                 |
| 0 | Q78K4   | MICO5 complex subunit Mic27                                                                          |
| 0 | Q9U735  | Ubiquitin conjugation factor E4 A                                                                    |
| 0 | Q62WR5  | Nesprin-3                                                                                            |
| 0 | Q9D883  | Splicing factor U2AF 35 kDa subunit;Splicing factor U2AF 26 kDa subunit                              |
| 0 | Q9R118  | Serine protease HTRA1                                                                                |
| 0 | Q9U1K1  | Proteasomal ubiquitin receptor ADRM1                                                                 |
| 0 | P12787  | Cytochrome c oxidase subunit 5A, mitochondrial                                                       |
| 0 | Q60631  | Growth factor receptor-bound protein 2                                                               |
| 0 | P62743  | AP-2 complex subunit sigma                                                                           |
| 0 | Q9D281  | Protein Noxp20                                                                                       |
| 0 | Q885X8  | Ribosomal protein S6 kinase beta-1                                                                   |
| 0 | Q70335  | Rho-associated protein kinase 1                                                                      |
| 0 | Q80V99  | Serine/threonine-protein kinase WNK3                                                                 |
| 0 | Q64P93  | Phosphatidylinositol 3-kinase;Phosphatidylinositol 3-kinase catalytic subunit type 3                 |
| 0 | Q9D0C8  | Casein kinase I isoform delta                                                                        |
| 0 | Q9D0C8  | Casein kinase I isoform delta                                                                        |
| 0 | Q9WTR2  | Mitogen-activated protein kinase kinase kinase 6                                                     |
| 0 | P62254  | Ubiquitin-conjugating enzyme E2 G1;Ubiquitin-conjugating enzyme E2 G1, N-terminally processed        |
| 0 | Q88FT2  | HAUS augmin-like complex subunit 4                                                                   |
| 0 | Q9R0P5  | Destrin                                                                                              |
| 0 | Q791V5  | Mitochondrial carrier homolog 2                                                                      |
| 0 | Q8K142  | Low density lipoprotein receptor adapter protein 1                                                   |
| 0 | P62340  | TATA box-binding protein-like protein 1                                                              |
| 0 | Q9D0C4  | Interferon-induced 35 kDa protein homolog                                                            |
| 0 | Q8R813  | Conserved oligomeric Golgi complex subunit 6                                                         |
| 0 | Q8K2C9  | Very-long-chain (3R)-3-hydroxyacyl-CoA dehydrogenase 3                                               |
| 0 | E9Q7L1  |                                                                                                      |
| 0 | Q9CR59  | Growth arrest and DNA damage-inducible proteins-interacting protein 1                                |
| 0 | Q60739  | BAG family molecular chaperone regulator 1                                                           |
| 0 | Q8K3X2  | Coiled-coil domain-containing protein 90B, mitochondrial                                             |
| 0 | Q99H.C8 | Translation initiation factor eIF-2B subunit alpha                                                   |
| 0 | Q3U0V2  | Tumor necrosis factor receptor type 1-associated DEATH domain protein                                |
| 0 | P62322  | US snRNA-associated 5m-like protein LSm5                                                             |
| 0 | Q9D045  | Protein LPL homolog                                                                                  |
| 0 | Q8K612  | Succinate dehydrogenase assembly factor 2, mitochondrial                                             |
| 0 | Q00780  | Collagen alpha-1(VIII) chain;Vastatin                                                                |
| 0 | P37889  | Fibulin-2                                                                                            |
| 0 | Q61263  | Sterol O-acyltransferase 1                                                                           |
| 0 | Q8R2Y9  | SOSS complex subunit B1                                                                              |
| 0 | P47955  | 60S acidic ribosomal protein P1                                                                      |
| 0 | Q9D0L8  | Peptidyl-prolyl cis-trans isomerase-like 3                                                           |
| 0 | Q8VCS7  | BTB/POZ domain-containing protein KCTD5                                                              |
| 0 | P38060  | Hydroxymethylglutaryl-CoA lyase, mitochondrial                                                       |
| 0 | Q3V485  | COMM domain-containing protein 6                                                                     |
| 0 | Q9D8T3  | Coiled-coil domain-containing protein 97                                                             |
| 0 | Q91W68  | Bifunctional UDP-N-acetylglucosamine 2-epimerase/N-acetylmannosamine kinase;UDP-N-acetylglu          |
| 0 | Q88H69  | Selenide, water dikinase 1                                                                           |
| 0 | Q9CUX1  | 52 kDa repressor of the inhibitor of the protein kinase                                              |
| 0 | P62073  | Mitochondrial import inner membrane translocase subunit Tim10                                        |
| 0 | Q88393  | Transforming growth factor beta receptor type 3                                                      |
| 0 | P05977  | Myosin light chain 1/3, skeletal muscle isoform;Myosin light chain 3                                 |
| 0 | Q91W53  | Golggin subfamily A member 7                                                                         |
| 0 | Q923A2  | Protein Spindly                                                                                      |
| 0 | Q9D9N8  | Insulin-like growth factor 2 mRNA-binding protein 3                                                  |
| 0 | Q9N9N3  | 39S ribosomal protein L16, mitochondrial                                                             |
| 0 | Q3UM45  | Protein phosphatase 1 regulatory subunit 7                                                           |
| 0 | Q9N9H9  | SH3 domain-binding protein 5-like                                                                    |
| 0 | Q9N9L5  | Elongator complex protein 5                                                                          |
| 0 | Q9N9P5  | Phosphatidate phosphatase LPIN2                                                                      |
| 0 | Q8V062  | UPF0696 protein C11orf68 homolog                                                                     |
| 0 | Q8K1R3  | Polynucleotide diphosphate kinase 1, mitochondrial                                                   |
| 0 | Q5U529  | BRCA1-A complex subunit RAP80                                                                        |
| 0 | Q78W27  | DNA-directed RNA polymerase I subunit RPA43                                                          |
| 0 | Q9N9J5  | Diphosphomevalonate decarboxylase                                                                    |
| 0 | P11826  | Phosphorylase b kinase regulatory subunit alpha, skeletal muscle isoform                             |
| 0 | Q55580  | Dehydrogenase/reductase SDR family member 13                                                         |
| 0 | Q9N9M1  | PER2 amino acid-rich with GYF domain-containing protein 1                                            |
| 0 | Q91V84  | Hermansky-Pudlak syndrome 3 protein homolog                                                          |
| 0 | Q9NW42  | Nuclear receptor corepressor 2                                                                       |
| 0 | P32020  | Non-specific lipid-transfer protein                                                                  |
| 0 | Q71511  | Pleckstrin homology domain-containing family M member 1                                              |
| 0 | Q8C5D8  | E3 SUMO-protein ligase PIAS2;E3 SUMO-protein ligase PIAS1                                            |

|                 |            |   |
|-----------------|------------|---|
| Sacm1l          | mmu:83493  | 1 |
| Ptpn1           | mmu:19246  | 1 |
| Pcid2           | mmu:234069 |   |
| Actn4           |            |   |
| Cd44            | mmu:12505  |   |
| Cops5           | mmu:26754  |   |
| Frm8b           | mmu:67457  |   |
| Bak1            | mmu:12018  | 1 |
| Fanci           | mmu:208836 |   |
| Vps25           | mmu:28084  |   |
| Fau             |            |   |
| Lclat1          | mmu:225010 |   |
| Aagab           | mmu:66939  |   |
| Abcc1           | mmu:17250  |   |
| Nfatc2ip        | mmu:18020  |   |
| Dad1            | mmu:13135  |   |
| Mat2a           | mmu:232087 |   |
| Gins2           | mmu:272551 |   |
| Rhog            | mmu:56212  |   |
| Polr3f          | mmu:70408  |   |
| Sin3a           | mmu:20466  | 1 |
| Tubgcp4         | mmu:51885  |   |
| Tmem258         | mmu:69038  |   |
| Rfx1            | mmu:19724  |   |
| Micu1           | mmu:216001 |   |
| Zc3h7b          | mmu:20286  |   |
| Capza2          | mmu:12343  |   |
| Upf2            | mmu:326622 |   |
| Sec61a1,Sec61a2 | mmu:53421  |   |
| Tden54          | mmu:76265  |   |
| Ergic1          | mmu:67458  |   |
| Apbb1           | mmu:11785  |   |
| h Pnkp          |            | 1 |
| Mex3c,Mex3d     | mmu:240396 |   |
| Apmap           | mmu:71881  |   |
| Gpn3            | mmu:68080  |   |
| Kira2           |            |   |
| Rragc,Rrag      | mmu:54170  |   |
| Inppad1         | mmu:242221 | 1 |
| Surf4           | mmu:20992  |   |
| Anapc7          | mmu:56317  |   |
| Diap1,Diap2     | mmu:13367  | 1 |
| Stat3           | mmu:20848  |   |
| Fkbp9           | mmu:27055  |   |
| Capza1          | mmu:12340  |   |
| Ligl1           | mmu:16897  |   |
| Gcc2            |            |   |
| Vasp            | mmu:22323  |   |
| Ckap4           | mmu:216197 |   |
| Vps28           | mmu:66914  |   |
| Lanc2           | mmu:71835  |   |
| Ipo11           | mmu:76582  |   |
| Atp1b3          | mmu:11933  |   |
| Ccz1            | mmu:231874 |   |
| Apool           | mmu:68117  |   |
| Ube4a           | mmu:140630 |   |
| Syne1           | mmu:64009  | 1 |
| U2af1,U2a       | mmu:108121 |   |
| Hra1            | mmu:56213  |   |
| Grip774,A       | mmu:56436  |   |
| Co5a            | mmu:12858  |   |
| Grb2            | mmu:14784  |   |
| Ap2s1           | mmu:232910 |   |
| Fam114a1        | mmu:68303  | 1 |
| Rps6kb1         | mmu:72508  | 1 |
| Rock1           | mmu:19877  | 1 |
| Wnk3            | mmu:279561 | 1 |
| Plk3c3          | mmu:225326 | 1 |
| Conk1d          | mmu:104318 | 1 |
| Conk1d          | mmu:104318 | 1 |
| Map3k6          |            | 1 |
| Ube2g1          | mmu:67128  |   |
| Haus4           | mmu:219072 | 1 |
| Dstn            | mmu:56431  |   |
| Mtch2           | mmu:56428  |   |
| Ldlrap1         | mmu:100017 |   |
| Tbpl1           | mmu:237336 |   |
| Ifh35           | mmu:70110  |   |
| Cog6            | mmu:67542  |   |
| Hacd3           | mmu:57874  |   |
| Ubr2            | mmu:382038 |   |
| Gadd45gfp       | mmu:102060 |   |
| Bag1            | mmu:12017  |   |
| Ccdc90b         | mmu:66365  |   |
| Eif2b1          | mmu:209354 |   |
| Tradd           | mmu:71609  |   |
| Lsm5            | mmu:66373  |   |
| Lph             | mmu:66225  |   |
| Sdhaf2          | mmu:66072  |   |
| Cd81a1          | mmu:12837  |   |
| Fhlh2           | mmu:14115  |   |
| Soat1           | mmu:20652  |   |
| Nabp2           | mmu:69917  |   |
| Gm10073         | mmu:56040  |   |
| Ppil3           | mmu:70225  |   |
| Kctd5           | mmu:69259  |   |
| Hmgcl           | mmu:15356  |   |
| Commdd          | mmu:66200  |   |
| Ccdc97          | mmu:52132  |   |
| Gne             | mmu:50798  |   |
| Spshs1          | mmu:109079 |   |
| Pkrir1          | mmu:72981  |   |
| Timm10          | mmu:30059  |   |
| Tgfbir3         | mmu:21814  |   |
| My1l,My13       | mmu:17901  |   |
| Golga7          | mmu:57437  |   |
| Spd11           | mmu:70385  |   |
| Igf2bp3         | mmu:140488 |   |
| Mprl16          | mmu:94063  |   |
| Mprl17          | mmu:66385  |   |
| Sh3bp5l         | mmu:79566  |   |
| Elo5            | mmu:54351  |   |
| Lpin2           | mmu:64898  |   |
| A1837181        | mmu:107242 |   |
| Pnpt1           | mmu:71701  | 1 |
| Uimc1           | mmu:20184  |   |
| Twistnb         | mmu:28071  |   |
| Mvd             | mmu:192156 |   |
| Phka1           | mmu:18679  |   |
| Dhrs13          | mmu:70451  |   |
| Glypf1          | mmu:57340  |   |
| Hps3            | mmu:12887  |   |
| Ncor2           | mmu:20602  |   |
| Scp2            | mmu:20280  |   |
| Plekhn1         | mmu:353047 |   |
| Pias2,Pias2     | mmu:17344  |   |

|      |         |         |         |         |
|------|---------|---------|---------|---------|
| 3140 | -0.8990 | 0.3535  | -0.2431 | -0.2629 |
| 3141 | 0.5928  | 0.9438  | -0.4343 | -0.2618 |
| 3142 | -0.0808 | 0.0495  | -0.7499 | -0.2603 |
| 3143 | -1.0828 | -0.1021 | 0.4269  | -0.2527 |
| 3144 | 0.2489  | 0.7015  | -0.2774 | -0.2465 |
| 3145 | -0.9699 | 0.0000  | -0.2329 | -0.2408 |
| 3146 | -0.5238 | 0.0000  | -0.5529 | -0.2399 |
| 3147 | 0.1556  | 0.1399  | -1.0000 | -0.2350 |
| 3148 | -0.3192 | 0.5326  | 0.1507  | -0.2337 |
| 3149 | -0.2865 | 0.1447  | -0.5526 | -0.2315 |
| 3150 | -0.3916 | 0.3295  | -0.6263 | -0.2295 |
| 3151 | -1.7376 | 0.7581  | 1.8206  | -0.2250 |
| 3152 | -0.4775 | 0.6250  | -0.8113 | -0.2213 |
| 3153 | 0.0930  | 0.0057  | -0.8089 | -0.2201 |
| 3154 | 0.8283  | -0.7611 | -0.7262 | -0.2197 |
| 3155 | -0.0089 | 0.5875  | -1.1942 | -0.2173 |
| 3156 | 0.1397  | -0.3920 | -0.3915 | -0.2146 |
| 3157 | -0.0436 | 1.4541  | -1.0556 | -0.2144 |
| 3158 | 0.5835  | 0.6438  | -1.8651 | -0.2126 |
| 3159 | 0.5750  | -0.5902 | -0.6229 | -0.2125 |
| 3160 | -0.5944 | -0.2328 | 0.2150  | -0.2041 |
| 3161 | 0.2515  | 0.7904  | 0.0772  | -0.2040 |
| 3162 | -1.5446 | 0.0830  | 0.8640  | -0.1995 |
| 3163 | 0.2602  | 0.0664  | 0.7900  | -0.1982 |
| 3164 | -0.4898 | -0.5862 | -0.3048 | -0.1904 |
| 3165 | 0.8069  | 0.0166  | -0.4423 | -0.1838 |
| 3166 | -0.5206 | 0.1325  | -0.1625 | -0.1825 |
| 3167 | 0.1854  | 0.1547  | -0.8638 | -0.1746 |
| 3168 | 0.3627  | -1.1111 | 0.2310  | -0.1722 |
| 3169 | -0.2663 | 0.8918  | -1.1253 | -0.1666 |
| 3170 | 0.3015  | 0.8254  | -0.1659 | -0.1659 |
| 3171 | -0.5333 | 0.1331  | -0.0811 | -0.1604 |
| 3172 | -0.1623 | 0.2305  | -0.5429 | -0.1582 |
| 3173 | -0.6065 | -0.1495 | 0.2834  | -0.1575 |
| 3174 | -1.3856 | -1.2810 | -2.2012 | -0.1558 |
| 3175 | -0.0088 | 0.2669  | -0.7883 | -0.1548 |
| 3176 | 0.2507  | 0.0000  | -0.6902 | -0.1535 |
| 3177 | -0.1171 | 0.7435  | 0.4034  | -0.1524 |
| 3178 | -0.2746 | -0.6148 | 0.4416  | -0.1493 |
| 3179 | -0.7092 | 0.8277  | -0.5636 | -0.1484 |
| 3180 | -1.2390 | 0.3185  | 0.4844  | -0.1454 |
| 3181 | 0.2034  | 0.7447  | 0.1135  | -0.1426 |
| 3182 | 0.1971  | 0.0000  | -0.6004 | -0.1411 |
| 3183 | 0.1704  | 0.1224  | 0.4680  | -0.1400 |
| 3184 | -0.3264 | 0.6937  | 0.4032  | -0.1390 |
| 3185 | -1.2310 | 0.1748  | -0.0889 | -0.1385 |
| 3186 | -1.6136 | -0.1488 | -1.1797 | -0.1379 |
| 3187 | -0.5467 | 0.4442  | -0.5088 | -0.1354 |
| 3188 | 0.3499  | -0.6079 | -0.1402 | -0.1327 |
| 3189 | 0.6457  | -0.3585 | -0.6831 | -0.1320 |
| 3190 | -0.0624 | -0.3784 | -0.0476 | -0.1310 |
| 3191 | -0.7461 | 0.1076  | 0.2543  | -0.1281 |
| 3192 | -1.5061 | 0.4467  | -1.4416 | -0.1274 |
| 3193 | -1.0776 | 0.3188  | 0.3843  | -0.1248 |
| 3194 | -0.0938 | 0.3347  | -0.0547 | -0.1240 |
| 3195 | -0.3103 | 0.1748  | -0.2879 | -0.1221 |
| 3196 | -0.7255 | -0.3488 | -0.4863 | -0.1219 |
| 3197 | -0.0636 | 0.4902  | -0.1385 | -0.1204 |
| 3198 | 0.4827  | -0.6091 | -0.2321 | -0.1195 |
| 3199 | -0.5741 | 0.1540  | 0.0825  | -0.1125 |
| 3200 | 0.5728  | -1.1687 | 0.2615  | -0.1115 |
| 3201 | -0.2262 | 0.3482  | -0.4446 | -0.1075 |
| 3202 | 0.2542  | -0.3099 | -0.2620 | -0.1059 |
| 3203 | 0.7657  | 0.0000  | -1.0288 | -0.0946 |
| 3204 | -0.8058 | 0.1608  | 0.3778  | -0.0891 |
| 3205 | 0.2445  | 0.8960  | -0.4629 | -0.0889 |
| 3206 | -0.2658 | 1.2738  | -0.7274 | -0.0826 |
| 3207 | 0.2650  | -0.3081 | -0.8781 | -0.0850 |
| 3208 | -0.4798 | 0.1144  | 0.3464  | -0.0826 |
| 3209 | 0.3087  | -0.5528 | -0.0819 | -0.0819 |
| 3210 | 0.0652  | 0.0000  | -0.2925 | -0.0791 |
| 3211 | -0.7710 | -0.0620 | 0.5978  | -0.0784 |
| 3212 | 0.0601  | 0.2792  | -0.0759 | -0.0759 |
| 3213 | -0.1543 | 0.4457  | -0.5188 | -0.0751 |
| 3214 | -0.3159 | -0.3513 | 0.4401  | -0.0690 |
| 3215 | 0.2484  | 0.8960  | -0.3475 | -0.0687 |
| 3216 | -1.0539 | -0.3248 | -1.1977 | -0.0635 |
| 3217 | -0.8150 | 0.2871  | 0.3391  | -0.0629 |
| 3218 | -0.5454 | 0.3119  | 0.0531  | -0.0599 |
| 3219 | 0.7261  | 0.1264  | -1.0278 | -0.0584 |
| 3220 | 0.0963  | 0.2332  | -0.4970 | -0.0558 |
| 3221 | 0.6548  | 0.1441  | 0.3533  | -0.0524 |
| 3222 | 0.4562  | 0.3600  | 0.2342  | -0.0480 |
| 3223 | 0.2147  | 0.7534  | 0.4106  | -0.0434 |
| 3224 | -0.0365 | 0.4032  | -0.1081 | -0.0425 |
| 3225 | 0.1436  | -0.1330 | -0.1352 | -0.0415 |
| 3226 | 0.5118  | 0.5546  | -0.5546 | -0.0395 |
| 3227 | 0.1372  | -0.1010 | -0.2479 | -0.0385 |
| 3228 | 0.0000  | -0.8011 | 0.7272  | -0.0376 |
| 3229 | -0.7163 | 0.1203  | 0.4976  | -0.0376 |
| 3230 | 0.0000  | 0.1353  | -0.1994 | -0.0364 |
| 3231 | 0.6111  | 0.3480  | -1.0392 | -0.0274 |
| 3232 | -0.5516 | 0.9471  | 0.4763  | -0.0269 |
| 3233 | 0.0000  | 0.2300  | 0.1335  | -0.0257 |
| 3234 | 0.1624  | 0.4478  | -0.7020 | -0.0250 |
| 3235 | 0.2122  | 0.6818  | -0.4189 | -0.0248 |
| 3236 | 0.0000  | 0.3618  | -0.4165 | -0.0248 |
| 3237 | -0.5100 | 0.1917  | 0.2311  | -0.0248 |
| 3238 | 0.3745  | -0.4329 | -0.0000 | -0.0248 |
| 3239 | 0.3869  | -0.3216 | -0.0955 | -0.0248 |
| 3240 | 0.1513  | -0.2781 | 0.1000  | -0.0248 |
| 3241 | -0.1011 | 0.2720  | -0.1857 | -0.0248 |
| 3242 | 0.0970  | 0.0460  | 0.0640  | -0.0248 |
| 3243 | 0.1130  | 0.1918  | 0.0984  | -0.0248 |
| 3244 | 0.9889  | -0.4115 | -0.1777 | -0.0248 |
| 3245 | -0.1005 | 0.5498  | 0.4688  | -0.0248 |
| 3246 | -0.1906 | -0.2971 | -0.1164 | -0.0248 |
| 3247 | 0.4293  | -0.0624 | 0.4701  | -0.0248 |
| 3248 | 0.6059  | -0.2793 | -0.3039 | -0.0248 |
| 3249 | -0.0830 | -0.4027 | 0.5089  | -0.0248 |
| 3250 | -0.0580 | -0.1566 | 0.2372  | -0.0248 |
| 3251 | 0.0657  | 0.6247  | 0.5841  | -0.0248 |
| 3252 | 0.0000  | 0.1019  | 0.0955  | -0.0248 |
| 3253 | 0.4371  | 0.0781  | -0.3196 | -0.0248 |
| 3254 | -0.2148 | 0.4032  | -0.3478 | -0.0248 |
| 3255 | 0.1416  | -0.4381 | -0.2182 | -0.0248 |
| 3256 | 0.3714  | -0.0419 | -0.6216 | -0.0248 |
| 3257 | 0.1577  | -0.0633 | 0.2442  | -0.0248 |
| 3258 | 0.5311  | -0.3705 | -0.8230 | -0.0248 |
| 3259 | 0.4813  | -0.2477 | -0.1449 | -0.0248 |
| 3260 | -0.0644 | -0.0781 | 0.2239  | -0.0248 |
| 3261 | -0.1211 | 0.0000  | 0.1748  | -0.0248 |
| 3262 | -0.0954 | -0.2872 | 0.4803  | -0.0248 |
| 3263 | 0.2197  | 0.0559  | -0.0658 | -0.0248 |
| 3264 | -1.1612 | 1.4091  | -0.1473 | -0.0248 |
| 3265 | -0.1529 | 0.3205  | 0.0618  | -0.0248 |

|   |            |                                                                                                |
|---|------------|------------------------------------------------------------------------------------------------|
| 0 | Q90BL9     | 1-acylglycerol-3-phosphate O-acyltransferase ABHD5                                             |
| 0 | O89050     | Muskelin                                                                                       |
| 0 | O91V61     | Sideroflexin-3                                                                                 |
| 0 | Q91WE4     | UPF0729 protein C18orf52 homolog                                                               |
| 0 | Q92Z77     | BC12/adenovirus E1B 19 kDa protein-interacting protein 3-like                                  |
| 0 | Q71538     | Pyruvate dehydrogenase phosphatase regulatory subunit, mitochondrial                           |
| 0 | Q90D58     | ATP synthase subunit delta, mitochondrial                                                      |
| 0 | Q91H53     | Regulator complex protein LAMTOR2                                                              |
| 0 | Q8R1V4     | Transmembrane emp24 domain-containing protein 4                                                |
| 0 | Q62425     | Cytochrome c oxidase subunit NDUF44                                                            |
| 0 | Q920L8     | Gamma-glutamyl hydrolase                                                                       |
| 0 | Q61147     | Ceruloplasmin                                                                                  |
| 0 | Q920Q8     | Influenza virus NS1A-binding protein homolog                                                   |
| 0 | Q91B84     | General transcription factor I1H subunit 2                                                     |
| 0 | S4R269     |                                                                                                |
| 0 | P98917     | Caveolin;Caveolin-1;Caveolin-3                                                                 |
| 0 | Q78159     | Protein FAM63A                                                                                 |
| 0 | Q90D24     | Sentrin-specific protease 8                                                                    |
| 0 | Q80740     | DNA-directed RNA polymerase II subunit RP811                                                   |
| 0 | P97760     | DNA-directed RNA polymerase II subunit RP83                                                    |
| 0 | P61027     | Ras-related protein Rab-10                                                                     |
| 0 | A2A1J3     | FGGy carbohydrate kinase domain-containing protein                                             |
| 0 | Q9C283     | 39S ribosomal protein L55, mitochondrial                                                       |
| 0 | Q90720     | Non-structural maintenance of chromosomes element 1 homolog                                    |
| 0 | A1L3P4     | Sodium/hydrogen exchanger                                                                      |
| 0 | Q3U777     | 7-methylguanosine phosphate-specific 5'-nucleotidase                                           |
| 0 | Q9CQ06     | 39S ribosomal protein L24, mitochondrial                                                       |
| 0 | Q555W2     | Proteasome activator complex subunit 4                                                         |
| 0 | Q8R1T4     | Anaphase-promoting complex subunit 5                                                           |
| 0 | Q9CYN2     | Signal peptidase complex subunit 2                                                             |
| 0 | Q8B8B7     | Enolase-phosphatase E1                                                                         |
| 0 | Q8R1J9     | Torsin-2A                                                                                      |
| 0 | P19536     | Cytochrome c oxidase subunit 5B, mitochondrial                                                 |
| 0 | Q92179     | SHC SH2 domain-binding protein 1                                                               |
| 0 | Q3UHS5     | Splicing factor, suppressor of white-apricot homolog                                           |
| 0 | Q9CQ44     | Gem-associated protein 2                                                                       |
| 0 | Q8B911     | Protein kintouz                                                                                |
| 0 | Q81L23     | Thiamine-triphosphatase                                                                        |
| 0 | Q8K296     | Myotubularin-related protein 3                                                                 |
| 0 | Q9CX13     | Protein cornichon homolog 4                                                                    |
| 0 | P61082     | NEDD8-conjugating enzyme Ubc12                                                                 |
| 0 | P50637     | Translocator protein                                                                           |
| 0 | Q91J60     | Transforming acidic coiled-coil-containing protein 2                                           |
| 0 | Q88522     | NF-kappa-B essential modulator                                                                 |
| 0 | Q3U6R5     | Halooxid dehalogenase-like hydrolase domain-containing protein 2                               |
| 0 | Q92130     | Heterogeneous nuclear ribonucleoprotein D-like                                                 |
| 0 | Q9CQ27     | Very-long chain enoyl-CoA reductase                                                            |
| 0 | Q6NSQ7     | Protein LTV1 homolog                                                                           |
| 0 | Q80UW8     | DNA-directed RNA polymerases I, II, and III subunit RPABC1                                     |
| 0 | Q3TMM7     | Sulphydryl oxidase 2                                                                           |
| 0 | Q55103     | Periaxin                                                                                       |
| 0 | Q8C6G8     | WD repeat-containing protein 26                                                                |
| 0 | Q6PNC0     | DmX-like protein 1                                                                             |
| 0 | Q90D08     | mRNA turnover protein 4 homolog                                                                |
| 0 | Q90D39     | Translocase-associated protein subunit gamma                                                   |
| 0 | Q9CQ45     | Thioredoxin domain-containing protein 17                                                       |
| 0 | Q90B19     | Inorganic pyrophosphatase                                                                      |
| 0 | Q8CNC5     | Breast carcinoma-amplified sequence 3 homolog                                                  |
| 0 | B2R591     | RNA polymerase I-specific transcription initiation factor RRN3                                 |
| 0 | Q9CY26     | Uncharacterized protein C19orf60 homolog                                                       |
| 0 | Q35427     | DNA-directed RNA polymerase III subunit RPC9                                                   |
| 0 | Q9CX97     | WD repeat-containing protein 55                                                                |
| 0 | E9PY43     |                                                                                                |
| 0 | Q90C63     | F-box only protein 3                                                                           |
| 0 | Q8CX76     | Prenylcysteine oxidase-like                                                                    |
| 0 | Q80W5-4    | CAAX prenyl protease 1 homolog                                                                 |
| 0 | P99026     | Proteasome subunit beta type-4                                                                 |
| 0 | Q570Y9     | DEP domain-containing mTOR-interacting protein                                                 |
| 0 | Q60714     | Long-chain fatty acid transport protein 1                                                      |
| 0 | Q61E82     | Protein Jade-3                                                                                 |
| 0 | P26350     | Prothymosin alpha;Prothymosin alpha, N-terminally processed;Thymosin alpha                     |
| 0 | Q8C0M8     | Protein FAM160B1                                                                               |
| 0 | Q3TPE9     | Ankyrin repeat and MYND domain-containing protein 2                                            |
| 0 | Q9CWR7     | Metalloenductase STEAP1                                                                        |
| 0 | Q55057     | Retinal rod rhodopsin-sensitive cGMP 3,5-cyclic phosphodiesterase subunit delta                |
| 0 | Q8C3R1     | BRCA1-associated ATM activator 1                                                               |
| 0 | A0A087WS15 |                                                                                                |
| 0 | Q35435     | Dihydroorotate dehydrogenase (quinone), mitochondrial                                          |
| 0 | A2R5Y6     | TRMT1-like protein                                                                             |
| 0 | Q80R22     | Calcium-transporting ATPase;Calcium-transporting ATPase type 2C member 1                       |
| 0 | Q9CXY8     | Ribonuclease;Ribonuclease H2 subunit A                                                         |
| 0 | Q781E5     | F-box only protein 22                                                                          |
| 0 | Q99KF1     | Transmembrane emp24 domain-containing protein 9                                                |
| 0 | A3K6B4     | TBC1 domain family member 88                                                                   |
| 0 | Q70235     | Glutathione peroxidase;Phospholipid hydroperoxide glutathione peroxidase, mitochondrial;Phosph |
| 0 | P63937     | Serine/threonine-protein phosphatase PP1-gamma catalytic subunit                               |
| 0 | Q3U4G3     | Xyloside xylosyltransferase 1                                                                  |
| 0 | Q88R95     | Histone deacetylase;Histone deacetylase 3                                                      |
| 0 | Q924D0     | Reticulon-4-interacting protein 1, mitochondrial                                               |
| 0 | P97376     | Protein FRG1                                                                                   |
| 0 | P63002     | Amino-terminal enhancer of split                                                               |
| 0 | Q8R2Q4     | Ribosome-releasing factor 2, mitochondrial                                                     |
| 0 | Q3U276     | Succinate dehydrogenase assembly factor 1, mitochondrial                                       |
| 0 | Q91M13     | Rab5 GDP/GTP exchange factor                                                                   |
| 0 | Q99123     | GH3 domain-containing protein                                                                  |
| 0 | Q922N8     | Actin-like protein 6A                                                                          |
| 0 | Q8R863     | Protein FAM177A1                                                                               |
| 0 | Q8K215     | LYR motif-containing protein 4                                                                 |
| 0 | Q80W68     | Kin of IIRF-like protein 1                                                                     |
| 0 | Q63829     | COMM domain-containing protein 3                                                               |
| 0 | Q921J3     | Cysteine desulfurase, mitochondrial                                                            |
| 0 | Q3UVG3     | Protein FAM91A1                                                                                |
| 0 | Q3U182     | CREB-regulated transcription coactivator 2                                                     |
| 0 | Q90506     | Exosome complex component RRP41                                                                |
| 0 | Q92123     | NF-kappa-B inhibitor alpha                                                                     |
| 0 | Q54950     | 5-AMP-activated protein kinase subunit gamma-1                                                 |
| 0 | Q8R8G7     | Rab3 GTPase-activating protein non-catalytic subunit                                           |
| 0 | Q88GF7     | PAB-dependent poly(A)-specific ribonuclease subunit PAN2                                       |
| 0 | Q8C636     | Spermatogenesis-associated protein 16                                                          |
| 0 | Q35345     | Importin subunit alpha-7;Importin subunit alpha                                                |
| 0 | Q991C9     | Peroxisome assembly factor 2                                                                   |
| 0 | P28474     | Alcohol dehydrogenase class-3                                                                  |
| 0 | P62313     | U6 snRNA-associated Sm-like protein Lsm6                                                       |
| 0 | Q91K92     | Heat shock protein beta-8                                                                      |
| 0 | Q62P72     | Protein SMG5                                                                                   |
| 0 | P58242     | Acid sphingomyelinase-like phosphodiesterase 3b                                                |
| 0 | Q99K11     | NAD-dependent malic enzyme, mitochondrial                                                      |
| 0 | Q91P93     | Deoxyribose-phosphate aldolase                                                                 |
| 0 | Q62095     | ATP-dependent RNA helicase DDX3Y                                                               |
| 0 | Q9C660     | Vesicle transport protein GOT1B                                                                |
| 0 | Q8B1L1     | F-box only protein 30                                                                          |
| 0 | A0A180GR3  |                                                                                                |
| 0 | Q8R105     | Vacuolar protein sorting-associated protein 37C                                                |
| 0 | Q8R8V5     | Syntaxin-16                                                                                    |
| 0 | Q09061     | Proteasome subunit beta type-1                                                                 |
| 0 | P62077     | Mitochondrial import inner membrane translocase subunit Tim8 B                                 |

|           |            |
|-----------|------------|
| Abhd5     | mmu:67469  |
| Mkln1     | mmu:27418  |
| Sfnx3     | mmu:94280  |
|           | mmu:407819 |
| Bnip3l    | mmu:12177  |
| Pdpr      | mmu:319518 |
| Atpsd     | mmu:66043  |
| Lamtor2   | mmu:83409  |
| Tmed4     | mmu:103694 |
| Ndufa4    | mmu:17992  |
| Ggh       | mmu:14590  |
| Cp        | mmu:12870  |
| Ivms1abp  | mmu:117198 |
| Gtf2h2    | mmu:23894  |
| Akr1b10   |            |
| Cav1,Cav3 | mmu:12389  |
| Fam63a    | mmu:75     |

|      |         |         |         |
|------|---------|---------|---------|
| 3266 | 0.1214  | -0.2005 | -0.0009 |
| 3267 | -0.2712 | 0.2405  | 0.1505  |
| 3268 | 0.0432  | 0.5691  | -0.4936 |
| 3269 | 0.5987  | -0.8447 | -0.0415 |
| 3270 | -0.0000 | -0.9222 | 1.0743  |
| 3271 | 0.4382  | -0.2092 | -0.0932 |
| 3272 | -0.0641 | -0.0000 | -0.2124 |
| 3273 | -0.4173 | 0.8463  | -0.2903 |
| 3274 | -0.5913 | 0.6464  | -0.0906 |
| 3275 | 0.1855  | 0.4160  | -0.4374 |
| 3276 | -0.4790 | 0.9045  | -0.2468 |
| 3277 | 0.7683  | 0.0772  | -0.6652 |
| 3278 | -0.2477 | 0.2425  | 0.1857  |
| 3279 | 0.3244  | 0.2629  | -0.4058 |
| 3280 | -0.5828 | 1.3111  | -0.5426 |
| 3281 | -0.2899 | 0.1949  | -0.3049 |
| 3282 | -0.1229 | 0.6440  | -0.5756 |
| 3283 | -1.0951 | 0.0756  | 1.2270  |
| 3284 | 0.7247  | -0.1232 | -0.3643 |
| 3285 | 0.4399  | -0.0617 | -0.1449 |
| 3286 | -0.0101 | 0.6977  | -0.4092 |
| 3287 | -0.2637 | 0.7758  | -0.2503 |
| 3288 | -0.2152 | 0.6931  | -0.2151 |
| 3289 | -0.1309 | 0.2487  | -0.1453 |
| 3290 | 1.5450  | -1.0745 | -0.1974 |
| 3291 | 0.0984  | 0.6278  | -0.1647 |
| 3292 | 0.4771  | -0.1354 | 0.9301  |
| 3293 | -0.4814 | 0.5106  | -0.4980 |
| 3294 | 0.5738  | -0.1520 | -0.0915 |
| 3295 | 0.4825  | -0.1909 | -0.0261 |
| 3296 | 0.2602  | -0.1522 | 0.2411  |
| 3297 | 0.9033  | -0.8754 | 0.3246  |
| 3298 | -0.1530 | -0.0000 | 0.5161  |
| 3299 | -0.1062 | -0.3754 | 0.8529  |
| 3300 | -0.0804 | -0.1781 | 0.5387  |
| 3301 | 0.4618  | -0.3005 | -0.2535 |
| 3302 | 0.2251  | -0.1941 | -0.1384 |
| 3303 | 0.7333  | -0.5804 | -0.2676 |
| 3304 | 0.7440  | 0.1024  | -0.4213 |
| 3305 | 0.8447  | 0.3813  | -0.7993 |
| 3306 | -0.4797 | 0.3976  | 0.5114  |
| 3307 | -0.7549 | 0.6655  | 0.5372  |
| 3308 | 0.3846  | 0.1785  | -0.0961 |
| 3309 | 0.2867  | -0.0946 | 0.2609  |
| 3310 | -0.0859 | -0.1724 | 0.7448  |
| 3311 | -0.4444 | -0.2289 | 0.2188  |
| 3312 | 0.8848  | -0.6744 | -0.2859 |
| 3313 | 1.0096  | -0.5155 | -0.1663 |
| 3314 | -0.7426 | 0.7776  | -0.4703 |
| 3315 | 0.3350  | 0.4456  | -0.2750 |
| 3316 | -0.9802 | 0.4375  | 1.0612  |
| 3317 | 1.3067  | -0.6879 | -0.0902 |
| 3318 | 0.0747  | -0.1158 | 0.5707  |
| 3319 | -0.1248 | 0.5735  | 0.1086  |
| 3320 | -0.0000 | -0.1478 | -0.4467 |
| 3321 | 0.0534  | -0.0707 | -0.4287 |
| 3322 | 0.8680  | -0.2329 | -0.1345 |
| 3323 | 1.7270  | -0.3315 | -1.0504 |
| 3324 | -0.0441 | 0.6881  | -0.2546 |
| 3325 | 0.7711  | -0.2557 | 0.0824  |
| 3326 | -0.1951 | 0.3140  | 0.4956  |
| 3327 | 0.3510  | 0.8351  | -0.5708 |
| 3328 | 0.4598  | -0.4850 | 0.6425  |
| 3329 | 0.6761  | -0.2498 | 0.1963  |
| 3330 | -0.1393 | -0.1047 | -0.2573 |
| 3331 | 0.1158  | -0.1769 | -0.6646 |
| 3332 | 0.8034  | -0.4084 | -0.6518 |
| 3333 | 0.5779  | 0.4088  | 0.8159  |
| 3334 | -0.3318 | 0.2417  | 0.7376  |
| 3335 | 0.5601  | 0.1546  | -0.0638 |
| 3336 | -0.2471 | 0.4867  | 0.4320  |
| 3337 | 0.1491  | 0.6138  | -0.0631 |
| 3338 | 0.3647  | 0.8834  | -0.5428 |
| 3339 | 0.9502  | -0.0919 | -0.1530 |
| 3340 | -0.4025 | 1.4748  | -0.3654 |
| 3341 | 0.4856  | 0.8267  | -0.0888 |
| 3342 | 0.7748  | 0.6959  | -0.7435 |
| 3343 | -0.0000 | 0.4231  | 0.3255  |
| 3344 | 0.2303  | -0.0656 | 0.5867  |
| 3345 | 0.9179  | -0.0744 | 2.9101  |
| 3346 | -0.0956 | 0.3118  | 0.5414  |
| 3347 | -0.4770 | 0.2735  | 0.9723  |
| 3348 | -0.0934 | 0.0830  | 0.7813  |
| 3349 | 1.6457  | -0.7180 | -0.1527 |
| 3350 | -0.5466 | -0.1202 | 0.5682  |
| 3351 | -0.1751 | -0.4188 | 0.5682  |
| 3352 | 1.0398  | -0.6577 | 0.6228  |
| 3353 | 1.1055  | -0.1327 | -0.1650 |
| 3354 | 0.6027  | -0.2588 | 0.4868  |
| 3355 | -0.5349 | -0.3036 | 1.6706  |
| 3356 | 0.3934  | -0.6208 | 1.0661  |
| 3357 | 0.6634  | -0.0000 | 0.1845  |
| 3358 | 0.2344  | 0.8340  | -0.2185 |
| 3359 | 0.3092  | -0.0000 | 0.5776  |
| 3360 | 0.6404  | -0.2910 | -0.5047 |
| 3361 | 0.8136  | 1.8234  | -0.9727 |
| 3362 | 0.3981  | -0.0000 | -0.0000 |
| 3363 | 0.1404  | 1.2156  | -0.4701 |
| 3364 | 0.1055  | 0.9472  | -0.1530 |
| 3365 | -0.3154 | 1.4799  | -0.2481 |
| 3366 | -0.2799 | 0.7012  | -0.0644 |
| 3367 | -0.5444 | 0.5515  | 0.9336  |
| 3368 | -0.4017 | 0.5480  | 0.8074  |
| 3369 | -0.0901 | 1.2635  | -0.2062 |
| 3370 | 0.4744  | -0.5915 | -0.0038 |
| 3371 | 1.6053  | -0.7752 | -0.4044 |
| 3372 | 0.9991  | -0.0000 | -0.0781 |
| 3373 | 0.8896  | -0.7588 | -0.6289 |
| 3374 | 0.7692  | -0.5271 | 0.7855  |
| 3375 | -0.2661 | -0.3607 | 1.6717  |
| 3376 | -1.0906 | -0.6040 | 0.5535  |
| 3377 | -0.1604 | -0.1565 | 1.4038  |
| 3378 | -0.3750 | -0.3370 | 1.8023  |
| 3379 | -0.1253 | 0.8462  | 0.5783  |
| 3380 | -0.5947 | -0.0000 | 1.7104  |
| 3381 | -0.0000 | -0.1143 | 1.2509  |
| 3382 | -0.3119 | -0.4056 | 1.0239  |
| 3383 | -0.1381 | -0.2530 | 1.0122  |
| 3384 | 0.5739  | -0.5422 | 1.0986  |
| 3385 | -0.9148 | 1.4128  | 0.6350  |
| 3386 | 1.1846  | 0.9685  | -0.1033 |
| 3387 | -0.5248 | 0.3983  | 1.3114  |
| 3388 | 0.2659  | 1.1289  | -0.2099 |
| 3389 | 1.3814  | 0.1082  | 0.7864  |
| 3390 | -0.0000 | -0.0000 | 1.2364  |
| 3391 | 0.8277  | 0.6296  | -0.2042 |

|   |         |                                                                                                   |
|---|---------|---------------------------------------------------------------------------------------------------|
| 0 | Q9EPK5  | WW domain-containing transcription regulator protein 1                                            |
| 0 | Q64430  | Copper-transporting ATPase 1                                                                      |
| 0 | Q9D481  | Phosphatidylcholine:ceramide cholinephosphotransferase 2                                          |
| 0 | Q8BGX2  | Uncharacterized protein C19orf52 homolog                                                          |
| 0 | Q9JUK7  | AP-4 complex subunit mu-1                                                                         |
| 0 | Q6Q989  | E3 ubiquitin-protein ligase XIAP                                                                  |
| 0 | Q8R088  | Golgi phosphoprotein 3-like                                                                       |
| 0 | Q9Z0E0  | Neurochordin                                                                                      |
| 0 | P83940  | Transcription elongation factor B polypeptide 1                                                   |
| 0 | Q88M83  | Eukaryotic translation initiation factor 4E type 2                                                |
| 0 | Q9D0C2  | AP-3 complex subunit sigma-1                                                                      |
| 0 | Q8CH62  | Oral cancer-overexpressed protein 1 homolog                                                       |
| 0 | Q3TXY3  | SET and MYND domain-containing protein 5                                                          |
| 0 | Q8K194  | U4/U6,U5 small nuclear ribonucleoprotein 27 kDa protein                                           |
| 0 | Q8N7N5  | DOB1- and CUL4-associated factor 8                                                                |
| 0 | Q9C2N4  | F-box only protein 6                                                                              |
| 0 | Q61207  | Prospodin                                                                                         |
| 0 | Q8R400  | Ras-related protein Rab-39A                                                                       |
| 0 | Q9QU11  | Protein FAM89B                                                                                    |
| 0 | Q8VD75  | Huntingtin-interacting protein 1                                                                  |
| 0 | Q5XG73  | Acyl-CoA-binding domain-containing protein 5                                                      |
| 0 | Q9CWU9  | Nucleoporin Nup37                                                                                 |
| 0 | Q9QC54  | NADH dehydrogenase [ubiquinone] 1 subunit C2                                                      |
| 0 | Q8R6B2  | Tetratricopeptide repeat protein 7A                                                               |
| 0 | Q8R6V4  | Dipeptidyl peptidase 9                                                                            |
| 0 | P56873  | Sjogren syndrome/scleroderma autoantigen 1 homolog                                                |
| 0 | Q9C9Y3  | dCTP pyrophosphatase 1                                                                            |
| 0 | Q9Z2H4  | Mannose 1-phosphate guanylyltransferase alpha                                                     |
| 0 | Q9CQY3  | NADH dehydrogenase [ubiquinone] 1 beta subcomplex subunit 5, mitochondrial                        |
| 0 | Q9QYK7  | RING finger protein 11                                                                            |
| 0 | P28741  | Kinesin-like protein;Kinesin-like protein KIF3A                                                   |
| 0 | Q8R023  | Tripeptidyl-peptidase 1                                                                           |
| 0 | P0COA3  | Charged multivesicular body protein 6                                                             |
| 0 | P70280  | Vesicle-associated membrane protein 7                                                             |
| 0 | P52875  | Transmembrane protein 165                                                                         |
| 0 | P73546  | Urokinase plasminogen activator surface receptor                                                  |
| 0 | Q8K2L8  | Trafficking protein particle complex subunit 12                                                   |
| 0 | P68369  | Tubulin alpha-1A chain;Tubulin alpha-3 chain                                                      |
| 0 | Q9Z1A1  |                                                                                                   |
| 0 | Q91ZR1  | Ras-related protein Rab-4B                                                                        |
| 0 | Q35682  | Myeloid-associated differentiation marker                                                         |
| 0 | Q9QUX4  | Baculoviral IAP repeat-containing protein 1b;Baculoviral IAP repeat-containing protein 1g;Baculov |
| 0 | Q9R0X0  | Mediator of RNA polymerase II transcription subunit 20                                            |
| 0 | Q61521  | Proepiregulin;Epregulin                                                                           |
| 0 | Q9D1M4  | Eukaryotic translation elongation factor 1 epsilon-1                                              |
| 0 | Q64437  | Alcohol dehydrogenase class 4 mu/sigma chain                                                      |
| 0 | Q8K2C0  | COMMD domain-containing protein 9                                                                 |
| 0 | Q8R458  | TIP41-like protein                                                                                |
| 0 | Q9CQC5  | Cdc42 effector protein 3                                                                          |
| 0 | P62311  | U6 snRNA-associated Sm-like protein Lsm3                                                          |
| 0 | P01887  | Beta-2-microglobulin                                                                              |
| 0 | Q7TN31  | Angiogenic factor with G patch and FHA domains 1                                                  |
| 0 | Q9CQ56  | Vesicle transport protein USE1                                                                    |
| 0 | Q05816  | Fatty acid-binding protein, epidermal                                                             |
| 0 | P08030  | Adenine phosphoribosyltransferase                                                                 |
| 0 | P77854  |                                                                                                   |
| 0 | Q6T185  | Fasciculation and elongation protein zeta-2                                                       |
| 0 | Q7M759  | Alpha/beta hydrolase domain-containing protein 17B                                                |
| 0 | Q8R676  | MICAL-like protein 1                                                                              |
| 0 | Q6PHN9  | Ras-related protein Rab-35                                                                        |
| 0 | Q9CQ58  | Protein transport protein Sec61 subunit beta                                                      |
| 0 | Q8VE99  | Coiled-coil domain-containing protein 115                                                         |
| 0 | Q8CBY8  | Dynactin subunit 4                                                                                |
| 0 | Q8R0W5  | Aftiphilin                                                                                        |
| 0 | Q8R0Z2  | Rai GTPase-activating protein subunit beta                                                        |
| 0 | Q35625  | Axin-1                                                                                            |
| 0 | Q910C3  | Diablo homolog, mitochondrial                                                                     |
| 0 | P54116  | Erythrocyte band 7 integral membrane protein                                                      |
| 0 | Q8R2M1  | Glomulin                                                                                          |
| 0 | Q8R0X5  | 28S ribosomal protein S7, mitochondrial                                                           |
| 0 | Q8K1A0  | Methyltransferase-like protein 5                                                                  |
| 0 | Q8BTY2  | Anion exchange protein;Sodium bicarbonate cotransporter 3                                         |
| 0 | Q9IKF7  | 39S ribosomal protein L39, mitochondrial                                                          |
| 0 | Q35740  | Cbp/p300-interacting transactivator 2                                                             |
| 0 | Q9Z1W0  | Charged multivesicular body protein 1a                                                            |
| 0 | Q9CQ59  | Trafficking protein particle complex subunit 11                                                   |
| 0 | Q9D8U0  |                                                                                                   |
| 0 | Q9D097  | Uncharacterized protein C11orf98 homolog                                                          |
| 0 | Q8R978  | Protein FRA10AC1 homolog                                                                          |
| 0 | Q99M74  | Keratin, type II cuticular Hb2                                                                    |
| 0 | Q3U5Z8  | Deleted in autism protein 1 homolog                                                               |
| 0 | Q9CXC0  | IST1 homolog                                                                                      |
| 0 | Q9EC53  | C-Myc-binding protein                                                                             |
| 0 | Q8K183  | Pyridoal kinase                                                                                   |
| 0 | Q9ELW7  | Kinesin-like protein;Kinesin-like protein KIF13A                                                  |
| 0 | Q42AN61 |                                                                                                   |
| 0 | P75285  | Ras-related protein Rab-22A                                                                       |
| 0 | Q8K211  | High affinity copper uptake protein 1                                                             |
| 0 | P09528  | Ferritin heavy chain;Ferritin heavy chain, N-terminally processed                                 |
| 0 | Q8R6H7  | CDC42 small effector protein 2                                                                    |
| 0 | Q8VE70  | Programmed cell death protein 10                                                                  |
| 0 | Q08639  | Transcription factor Dp-1;Transcription factor Dp-2                                               |
| 0 | Q8K0F1  | TBC1 domain family member 23                                                                      |
| 0 | Q64314  | Hematopoietic progenitor cell antigen CD34                                                        |
| 0 | Q99M54  | Cell division cycle-associated protein 3                                                          |
| 0 | Q9CCE5  | Regulator of G-protein signaling 10                                                               |
| 0 | Q8CDA1  | Phosphatidylinositol phosphatase SAC2                                                             |
| 0 | Q8R7Y0  | Formin-binding protein 1                                                                          |
| 0 | Q9N1K5  | Multiple myeloma tumor-associated protein 2 homolog                                               |
| 0 | Q8RQ46  |                                                                                                   |
| 0 | Q35604  | Niemann-Pick C1 protein                                                                           |
| 0 | Q8R199  | Protein dopey-1                                                                                   |
| 0 | Q08917  | Flotillin-1                                                                                       |
| 0 | Q6PD26  | GPI transamidase component PIG-5                                                                  |
| 0 | Q32316  |                                                                                                   |
| 0 | Q8R834  | Meiosis arrest female protein 1                                                                   |
| 0 | Q9D1E6  | Tubulin-folding cofactor B                                                                        |
| 0 | Q9Z0D9  | WD repeat-containing protein 7                                                                    |
| 0 | Q9D0L5  | Coiled-coil domain-containing protein 91                                                          |
| 0 | Q3TXX3  | SOSS complex subunit C                                                                            |
| 0 | P40201  | Chromodomain-helicase-DNA-binding protein 1                                                       |
| 0 | E9Q7G1  |                                                                                                   |
| 0 | Q6VN19  | Ran-binding protein 10                                                                            |
| 0 | Q8C180  | Fibroblast growth factor receptor substrate 2                                                     |
| 0 | Q9D851  | Transmembrane protein 43                                                                          |
| 0 | Q8R1V3  | CDP9 signalosome complex subunit 7b                                                               |
| 0 | Q8K582  | Multiple coagulation factor deficiency protein 2 homolog                                          |
| 0 | Q8R6Q5  | Heterogeneous nuclear ribonucleoprotein A3                                                        |
| 0 | Q9CS42  | Ribose-phosphate pyrophosphokinase 2;Ribose-phosphate pyrophosphokinase 1                         |
| 0 | P62774  | Myotrophin                                                                                        |
| 0 | Q9CWD8  | Iron-sulfur protein NUBPL                                                                         |
| 0 | Q55125  | Protein NipSnap homolog 1                                                                         |
| 0 | Q9Z2X9  | Protein arginine N-methyltransferase 7                                                            |
| 0 | Q3UUX7  | Uncharacterized protein C4orf46 homolog                                                           |
| 0 | Q91WE1  | Sorting nexin-15                                                                                  |
| 0 | P23492  | Purine nucleoside phosphorylase                                                                   |

|            |            |    |
|------------|------------|----|
| Wwtr1      | mmu:97064  |    |
| Atp7a      | mmu:11977  |    |
| Sgms2      | mmu:74442  |    |
|            | mmu:69773  |    |
| Ap4m1      | mmu:11781  |    |
| Xiap       | mmu:11798  |    |
| Golp3h1    | mmu:229593 |    |
| Ncdn       | mmu:26562  |    |
| Tceb1      | mmu:67923  |    |
| Eif4e2     | mmu:26987  |    |
| Ap3s1      | mmu:11777  |    |
| Oraov1     | mmu:72284  |    |
| Smyd5      | mmu:232187 |    |
| Snrnp27    | mmu:66618  |    |
| Dcaf8      | mmu:98193  |    |
| Fbxo6      | mmu:50762  |    |
| Pspap      | mmu:19156  |    |
| Rab39a     | mmu:270160 |    |
| Fam89b     | mmu:17826  |    |
| Hip1       | mmu:215114 |    |
| Acdb5      | mmu:74159  |    |
| Nup37      | mmu:69736  |    |
| Ndufc2     | mmu:68197  |    |
| Ttc7;Ttc7a | mmu:225497 |    |
| Dpp9       | mmu:224897 |    |
| Ssca1      | mmu:56390  |    |
| Ctctp1     | mmu:69422  |    |
| Gmpga      | mmu:69080  |    |
| Ndufb5     | mmu:66046  |    |
| Rnf11      | mmu:29864  |    |
| Kif3a      | mmu:16568  |    |
| Tpp1       | mmu:12751  |    |
| Chmp6      | mmu:208092 |    |
| Vamp7      | mmu:20955  |    |
| Tmem165    | mmu:21982  |    |
| Pfau       | mmu:18793  |    |
| Trappc12   | mmu:217449 |    |
| Tuba1a;Tu  | mmu:22142  |    |
| Tfg        |            |    |
| Rab4b      | mmu:19342  |    |
| Myadm      | mmu:50918  |    |
| Naip2;Naip | mmu:17948  |    |
| Gm20517;G  | mmu:56771  |    |
| Ereg       | mmu:13874  |    |
| Eef1e1     | mmu:66143  |    |
| Adh7       | mmu:11529  |    |
| Comm9      | mmu:76501  |    |
| Tipr1      | mmu:226591 |    |
| Cdc42ep3   | mmu:260409 |    |
| Lsm3       | mmu:67678  |    |
| B2m        | mmu:12010  |    |
| Aggf1      | mmu:66549  |    |
| Use1       | mmu:67023  |    |
| Fabp5      | mmu:16592  |    |
| Aprt       | mmu:11821  |    |
| Ankrd50    |            |    |
| Fez2       | mmu:225020 |    |
| Abhd17b    | mmu:226016 |    |
| Mical1     | mmu:27008  |    |
| Rab35      | mmu:77407  |    |
| Sec61b;Gr  | mmu:66212  |    |
| Ccdc115    | mmu:69668  |    |
| Dctn4      | mmu:67665  | </ |

|      |         |         |         |         |
|------|---------|---------|---------|---------|
| 3392 | 0.9790  | 0.4675  | -0.1753 | 0.4237  |
| 3393 | 0.8919  | 1.1442  | -0.6722 | 0.4546  |
| 3394 | 1.7153  | 0.1432  | -0.4942 | 0.4548  |
| 3395 | -0.2613 | 1.0058  | 0.6532  | 0.4659  |
| 3396 | 0.5852  | -0.1957 | -1.1394 | 0.4677  |
| 3397 | 0.9840  | 0.4937  | -0.0937 | 0.4753  |
| 3398 | 0.2628  | -1.5086 | -0.3789 | 0.4886  |
| 3399 | 2.5236  | -1.0051 | -0.9338 | 0.4924  |
| 3400 | 0.7792  | 0.9995  | -0.2693 | 0.4932  |
| 3401 | -0.3815 | 0.1104  | 1.7481  | 0.5057  |
| 3402 | 1.7657  | 0.1002  | -0.3241 | 0.5139  |
| 3403 | 2.0802  | -0.0752 | 0.4494  | 0.5185  |
| 3404 | 1.5589  | -0.2619 | 0.2662  | 0.5211  |
| 3405 | 1.4088  | 0.2317  | -0.0728 | 0.5225  |
| 3406 | -0.0595 | 0.7665  | 0.8957  | 0.5341  |
| 3407 | -0.4765 | -0.5162 | 1.0391  | 0.5342  |
| 3408 | -0.5657 | 1.0982  | 0.8631  | 0.5330  |
| 3409 | -0.6687 | 0.6484  | 0.9529  | 0.5321  |
| 3410 | 1.1891  | 0.6610  | -0.1930 | 0.5524  |
| 3411 | 1.4427  | -0.3887 | 0.6473  | 0.5738  |
| 3412 | 0.3776  | 1.5053  | -0.1290 | 0.5846  |
| 3413 | 1.1348  | -0.1777 | 0.8067  | 0.5879  |
| 3414 | -2.0350 | 2.3740  | 1.4538  | 0.5976  |
| 3415 | -0.2020 | 0.6710  | 1.3384  | 0.6025  |
| 3416 | 2.5739  | 0.4122  | -1.0598 | 0.6421  |
| 3417 | 1.9053  | 0.0339  | -0.0588 | 0.6491  |
| 3418 | -0.0444 | 2.0805  | -1.1345 | 0.6528  |
| 3419 | 1.9899  | -0.6138 | 0.6709  | 0.6823  |
| 3420 | -0.2003 | 1.4750  | 0.7941  | 0.6896  |
| 3421 | 2.2129  | 0.1004  | -0.2402 | 0.6910  |
| 3422 | 0.8904  | 1.2941  | -0.0743 | 0.7032  |
| 3423 | 2.3625  | 0.4316  | -0.6034 | 0.7316  |
| 3424 | 4.0429  | -0.6703 | -1.1300 | 0.7475  |
| 3425 | 0.8224  | 1.8209  | -0.4006 | 0.7476  |
| 3426 | 1.5071  | -1.1367 | -0.1951 | 0.7782  |
| 3427 | 2.3378  | -0.2345 | 0.4494  | 0.8509  |
| 3428 | 2.0419  | -0.0989 | 1.0208  | 0.8845  |
| 3429 | 1.3255  | 2.5558  | -1.2204 | 0.8873  |
| 3430 | 1.5516  | 1.3092  | -0.0946 | 0.9221  |
| 3431 | 2.1664  | 1.6817  | -0.8667 | 0.9938  |
| 3432 | 3.8168  | -1.7036 | -0.9381 | 1.0171  |
| 3433 | 1.2100  | 4.2681  | -2.4122 | 1.0220  |
| 3434 | 4.2303  | 0.1370  | -1.2647 | 1.0342  |
| 3435 | -0.4605 | 1.7482  | 1.8052  | 1.0476  |
| 3436 | 2.5988  | 1.1077  | -0.4715 | 1.1082  |
| 3437 | 3.5344  | -0.0604 | -0.2989 | 1.2598  |
| 3438 | 1.8423  | -0.4683 | -0.6586 | 1.3091  |
| 3439 | 4.1014  | -0.2749 | -1.6425 | 1.8229  |
| 3440 | -0.6014 | NaN     | NaN     | -1.5520 |
| 3441 | -0.8059 | NaN     | NaN     | -0.9887 |
| 3442 | -0.9671 | NaN     | NaN     | -0.9671 |
| 3443 | -0.8695 | NaN     | NaN     | -0.8695 |
| 3444 | -0.0476 | -0.3688 | NaN     | -0.8043 |
| 3445 | -0.4403 | -1.0120 | NaN     | -0.7262 |
| 3446 | NaN     | -0.6591 | NaN     | -0.6594 |
| 3447 | -0.5288 | NaN     | NaN     | -0.5290 |
| 3448 | NaN     | NaN     | NaN     | -0.5207 |
| 3449 | NaN     | -0.2807 | -0.7922 | -0.5263 |
| 3450 | -0.4818 | NaN     | NaN     | -0.4818 |
| 3451 | -0.5082 | NaN     | NaN     | -0.3996 |
| 3452 | -0.0643 | NaN     | 0.4463  | -0.3759 |
| 3453 | NaN     | -0.0316 | -0.6508 | -0.3435 |
| 3454 | -0.9628 | NaN     | 0.3756  | -0.3024 |
| 3455 | -0.5043 | NaN     | NaN     | -0.2715 |
| 3456 | NaN     | NaN     | -0.2368 | -0.2368 |
| 3457 | NaN     | -0.2246 | NaN     | -0.2246 |
| 3458 | -0.3974 | -0.7239 | NaN     | -0.2075 |
| 3459 | NaN     | -0.0641 | NaN     | -0.2014 |
| 3460 | -0.1240 | NaN     | -1.3324 | -0.1399 |
| 3461 | NaN     | NaN     | 0.3216  | -0.1349 |
| 3462 | NaN     | NaN     | -0.1244 | -0.1244 |
| 3463 | NaN     | -0.0635 | -0.1555 | -0.1095 |
| 3464 | NaN     | NaN     | 0.1402  | -0.0836 |
| 3465 | -0.5419 | NaN     | NaN     | -0.0677 |
| 3466 | NaN     | 0.2367  | -0.3746 | -0.0942 |
| 3467 | -0.4387 | -0.5891 | NaN     | -0.0347 |
| 3468 | -0.1779 | NaN     | NaN     | -0.0377 |
| 3469 | -0.1146 | 0.0383  | NaN     | -0.0377 |
| 3470 | NaN     | NaN     | NaN     | -0.0377 |
| 3471 | -0.7015 | NaN     | NaN     | -0.0377 |
| 3472 | NaN     | -0.6053 | 0.4039  | -0.0408 |
| 3473 | NaN     | 0.2017  | NaN     | -0.0943 |
| 3474 | -0.5859 | NaN     | 1.1011  | 0.0950  |
| 3475 | NaN     | 0.3843  | -1.2873 | 0.1003  |
| 3476 | -0.3772 | NaN     | NaN     | 0.1345  |
| 3477 | NaN     | NaN     | -0.2887 | 0.1497  |
| 3478 | -0.2564 | NaN     | NaN     | 0.2566  |
| 3479 | 0.2639  | NaN     | NaN     | 0.2639  |
| 3480 | 0.2764  | NaN     | NaN     | 0.2764  |
| 3481 | 0.2880  | NaN     | NaN     | 0.2880  |
| 3482 | NaN     | 0.3025  | NaN     | 0.3025  |
| 3483 | -0.4888 | NaN     | 0.4584  | 0.3037  |
| 3484 | NaN     | 0.4137  | 0.1918  | 0.3078  |
| 3485 | -0.0119 | NaN     | NaN     | 0.3088  |
| 3486 | -0.3047 | NaN     | NaN     | 0.3544  |
| 3487 | NaN     | -0.3783 | NaN     | 0.3785  |
| 3488 | -0.3158 | NaN     | NaN     | 0.4686  |
| 3489 | NaN     | 0.5522  | 0.4875  | 0.5269  |
| 3490 | -0.5457 | NaN     | NaN     | 0.5457  |
| 3491 | NaN     | 0.2188  | 0.8958  | 0.5573  |
| 3492 | 0.7125  | NaN     | NaN     | 0.7125  |
| 3493 | 0.7363  | NaN     | NaN     | 0.7363  |
| 3494 | 1.1845  | NaN     | 0.3128  | 0.7487  |
| 3495 | 0.5405  | NaN     | 0.7949  | 0.8513  |
| 3496 | -0.7515 | -0.0494 | NaN     | 0.8644  |
| 3497 | -4.6140 | NaN     | NaN     | -4.6140 |
| 3498 | -4.3444 | NaN     | NaN     | -4.3444 |
| 3499 | -4.3191 | NaN     | NaN     | -4.3191 |
| 3500 | NaN     | NaN     | -0.3139 | -3.4357 |
| 3501 | -3.0881 | NaN     | NaN     | -3.0861 |
| 3502 | NaN     | NaN     | NaN     | -2.9963 |
| 3503 | -2.9455 | NaN     | NaN     | -2.9455 |
| 3504 | -2.8825 | NaN     | NaN     | -2.8825 |
| 3505 | -4.1861 | -1.5071 | NaN     | -2.8466 |
| 3506 | -4.1492 | NaN     | NaN     | -2.6420 |
| 3507 | NaN     | -0.4271 | -0.3816 | -2.6273 |
| 3508 | -2.6158 | NaN     | NaN     | -2.6153 |
| 3509 | NaN     | -2.5658 | NaN     | -2.5659 |
| 3510 | -0.8033 | NaN     | NaN     | -2.4415 |
| 3511 | -0.2916 | NaN     | -1.4432 | -2.4262 |
| 3512 | NaN     | -2.5191 | -1.9645 | -2.2418 |
| 3513 | NaN     | NaN     | -2.1184 | -2.1184 |
| 3514 | -1.9825 | NaN     | NaN     | -1.9825 |
| 3515 | -1.8917 | NaN     | NaN     | -1.9795 |
| 3516 | -0.0990 | NaN     | NaN     | -1.9210 |
| 3517 | NaN     | -1.9151 | NaN     | -1.9157 |

|   |         |                                                                                                           |
|---|---------|-----------------------------------------------------------------------------------------------------------|
| 0 | Q90SV6  | Synapse-associated protein 1                                                                              |
| 0 | Q77P55  | C2 domain-containing protein 5                                                                            |
| 0 | Q8R052  | IQ motif and SEC7 domain-containing protein 1                                                             |
| 0 | P35288  | Ras-related protein Rab-23                                                                                |
| 0 | Q01721  | Growth arrest-specific protein 1                                                                          |
| 0 | Q55SH7  | Zinc finger Z2-type and EF-hand domain-containing protein 1                                               |
| 0 | Q9CKU1  | Mediator of RNA polymerase II transcription subunit 31                                                    |
| 0 | Q8C0J8  | Stonin-1                                                                                                  |
| 0 | Q9JH95  | V-type proton ATPase subunit a                                                                            |
| 0 | Q8RUP5  | Ankyrin repeat domain-containing protein 13A                                                              |
| 0 | Q5SV85  | Synergism gamma                                                                                           |
| 0 | Q6PE86  | MOB-like protein phocin                                                                                   |
| 0 | Q8C0L8  | Conserved oligomeric Golgi complex subunit 5                                                              |
| 0 | Q9WU43  | ATP-dependent 6-phosphofructokinase;ATP-dependent 6-phosphofructokinase, platelet type                    |
| 0 | Q8B1L0  | SWI/SNF-related matrix-associated actin-dependent regulator of chromatin subfamily A-like protein 1       |
| 0 | Q99MV1  | Tudor domain-containing protein 1                                                                         |
| 0 | Q9JUX1  | Homocysteine-responsive endoplasmic reticulum-resident ubiquitin-like domain member 1 protein             |
| 0 | Q9QX51  | Plectin                                                                                                   |
| 0 | P97R08  | FXYD domain-containing ion transport regulator 5                                                          |
| 0 | Q77P22  | E3 ubiquitin-protein ligase DZIP3                                                                         |
| 0 | Z4YLD0  | UPF0428 protein Xorf56 homolog                                                                            |
| 0 | Q9DC9C  | 39S ribosomal protein L32, mitochondrial                                                                  |
| 0 | P17095  | High mobility group protein HMG-1/HMG-Y                                                                   |
| 0 | Q6A009  | E3 ubiquitin-protein ligase listerin                                                                      |
| 0 | Q8C436  | Protein-lysine methyltransferase METTL21D                                                                 |
| 0 | Q6J756  | Calpain-11                                                                                                |
| 0 | P01J28  | Ras-related protein Rab-8b                                                                                |
| 0 | Q9CQ25  | Mitotic-spindle organizing protein 2                                                                      |
| 0 | Q9EQN9  |                                                                                                           |
| 0 | Q9D0M0  | Exosome complex exonuclease RRP42                                                                         |
| 0 | Q8C61C  | BAG family molecular chaperone regulator 4                                                                |
| 0 | Q9CR88  | 28S ribosomal protein S14, mitochondrial                                                                  |
| 0 | Q9R9J4  | Tetratricopeptide repeat protein 5                                                                        |
| 0 | Q8K212  | Phosphorin acidic cluster sorting protein 1                                                               |
| 0 | Q91WV3  | Activating signal co-receptor 1 complex subunit 2                                                         |
| 0 | Q3U1V0  | Endoplasmic reticulum metalloproteinase 1                                                                 |
| 0 | Q9JMP6  | Cdk41 effector protein 4                                                                                  |
| 0 | P59672  | Ankyrin repeat and SAM domain-containing protein 1A                                                       |
| 0 | Q9D787  | Peptidyl-prolyl cis-trans isomerase-like 2                                                                |
| 0 | P62484  | Abi interactor 2                                                                                          |
| 0 | Q60778  | NF-kappa-B inhibitor beta                                                                                 |
| 0 | P45377  | Aldose reductase-related protein 2;Aldose reductase-related protein 1                                     |
| 0 | T07042  | Transmembrane protein 131                                                                                 |
| 0 | P16627  | Heat shock 70 kDa protein 1-like                                                                          |
| 0 | Q8B0R4  | KAT8 regulatory NSL complex subunit 2                                                                     |
| 0 | Q9C289  | Trafficking protein particle complex subunit 6B                                                           |
| 0 | P06745  | Glucose-5-phosphate isomerase                                                                             |
| 0 | Q8C166  | Copine-1                                                                                                  |
| 0 | Q56618  | AarF domain-containing protein kinase 4                                                                   |
| 0 | Q62388  | Serine-protein kinase ATM                                                                                 |
| 0 | P22518  | Dual specificity protein kinase CLK1                                                                      |
| 0 | Q8C8Q5  | Phosphatidylinositol 4-kinase type 2-beta                                                                 |
| 0 | Q55028  | [3-methyl-2-oxobutanoate dehydrogenase [lipoamide]] kinase, mitochondrial                                 |
| 0 | Q9JHU3  | Cyclin-dependent kinase 20                                                                                |
| 0 | P25618  | Platelet-derived growth factor receptor alpha                                                             |
| 0 | Q52407  | Seriated muscle-specific serine/threonine-protein kinase                                                  |
| 0 | Q6A0C5  | PAB-dependent poly(A)-specific ribonuclease subunit PAN3                                                  |
| 0 | P0C500  | Uncharacterized serine/threonine-protein kinase SBK3                                                      |
| 0 | Q6J9G1  | Tyrosine-protein kinase STYK1                                                                             |
| 0 | Q62312  | TGF-beta receptor type-2                                                                                  |
| 0 | Q07832  | Serine/threonine-protein kinase PLK1                                                                      |
| 0 | Q9D8U3  | Serine/threonine-protein kinase RIO3                                                                      |
| 0 | T07126  | Aurora kinase B                                                                                           |
| 0 | Q55047  | Serine/threonine-protein kinase tousel-like 2                                                             |
| 0 | P170424 | Receptor tyrosine-protein kinase erbB-2;Receptor tyrosine-protein kinase erbB-4;ERBB4 intracellular       |
| 0 | Q99AK8  | Beta-adrenergic receptor kinase 1;Beta-adrenergic receptor kinase 2                                       |
| 0 | Q91099  | Mitogen-activated protein kinase kinase kinase 5                                                          |
| 0 | Q92240  | 3-phosphoinositide-dependent protein kinase 1                                                             |
| 0 | Q69241  | Cyclin-dependent kinase 13                                                                                |
| 0 | Q54784  | Death-associated protein kinase 3                                                                         |
| 0 | Q35280  | Serine/threonine-protein kinase Chk1                                                                      |
| 0 | P54763  | Ephrin type-B receptor 2;Ephrin type-B receptor 1                                                         |
| 0 | Q05512  | Serine/threonine-protein kinase MARK2                                                                     |
| 0 | Q80X41  | Serine/threonine-protein kinase VRK1                                                                      |
| 0 | Q60823  | RAC-beta serine/threonine-protein kinase                                                                  |
| 0 | P70182  | Phosphatidylinositol 4-phosphate 5-kinase type-1 alpha                                                    |
| 0 | Q91KX8  | Serine/threonine-protein kinase ATR                                                                       |
| 0 | Q3U1U4  | STE20-related kinase adapter protein alpha                                                                |
| 0 | Q61532  | Mitogen-activated protein kinase 6                                                                        |
| 0 | P97820  | Mitogen-activated protein kinase kinase kinase kinase 2                                                   |
| 0 | Q8C078  | Calcium/calmodulin-dependent protein kinase kinase 4                                                      |
| 0 | Q99PW4  | TP53-regulating kinase                                                                                    |
| 0 | Q03141  | MAP/microtubule affinity-regulating kinase 3                                                              |
| 0 | A2ZG49  | Kalirin                                                                                                   |
| 0 | Q14AK6  | Cyclin-dependent kinase 12                                                                                |
| 0 | Q99N57  | Raf proto-oncogene serine/threonine-protein kinase                                                        |
| 0 | Q61161  | Mitogen-activated protein kinase kinase kinase kinase 2                                                   |
| 0 | Q81116  | Microtubule-associated serine/threonine-protein kinase 4                                                  |
| 0 | Q04735  | Cyclin-dependent kinase 16                                                                                |
| 0 | P97477  | Aurora kinase A                                                                                           |
| 0 | P54754  | Ephrin type-B receptor 3                                                                                  |
| 0 | Q91296  | BMP-2-inducible protein kinase                                                                            |
| 0 | Q88351  | Inhibitor of nuclear factor kappa-B kinase subunit beta                                                   |
| 0 | Q62406  | Interleukin-1 receptor-associated kinase 1                                                                |
| 0 | P15092  | Fibroblast growth factor receptor;Fibroblast growth factor receptor 1;Fibroblast growth factor receptor 2 |
| 0 | Q9CVP9  | Protein-tyrosine kinase 2-beta                                                                            |
| 0 | Q9JH52  | Mitochondrial-like kinase 1                                                                               |
| 0 | Q62074  | Protein kinase C iota type                                                                                |
| 0 | Q88G48  | Serine/threonine-protein kinase 17B                                                                       |
| 0 | Q35495  | Cyclin-dependent kinase 14                                                                                |
| 0 | Q922W1  | Serine/threonine-protein kinase 25                                                                        |
| 0 | Q9WUT6  | Mitogen-activated protein kinase 9                                                                        |
| 0 | Q92277  | Tyrosine-protein kinase BAZ1B                                                                             |
| 0 | Q55006  | Leucine-rich repeat serine/threonine-protein kinase 2                                                     |
| 0 | Q80K14  | Phosphatidylinositol 5-phosphate 4-kinase type-2 beta                                                     |
| 0 | Q99M19  | ATP-dependent RNA helicase DDX50                                                                          |
| 0 | Q3U1D1  | RNA-binding protein 40                                                                                    |
| 0 | Q8B0H8  | Serpin-specific protease 7                                                                                |
| 0 | Q93092  | Transaldolase                                                                                             |
| 0 | Q8K217  | REL-like protein 1                                                                                        |
| 0 | Q8CEC6  | Peptidylprolyl isomerase domain and WD repeat-containing protein 1                                        |
| 0 | P54099  | DNA polymerase subunit gamma-1                                                                            |
| 0 | Q9C2T4  | DNA-directed RNA polymerase III subunit RPOC5                                                             |
| 0 | Q9E5K9  | RBI-inducible coiled-coil protein 1                                                                       |
| 0 | P34056  | Transcription factor AP-2-alpha;Transcription factor AP-2-epsilon;Transcription factor AP-2-beta          |
| 0 | P97314  | Cysteine and glycine-rich protein 2                                                                       |
| 0 | Q8C417  | Transducin beta-like protein 3                                                                            |
| 0 | P62492  | Ras-related protein Rab-11A                                                                               |
| 0 | E99Y12  |                                                                                                           |
| 0 | Q6PAQ4  | RNA exonuclease 4                                                                                         |
| 0 | Q8C862  | Centrobion                                                                                                |
| 0 | Q8R332  | Nucleoporin p58/p45                                                                                       |
| 0 | P98192  | Dihydroxyacetone phosphate acyltransferase                                                                |
| 0 | Q9CQX4  | PCNA-associated factor                                                                                    |
| 0 | Q9CQ75  | NADH dehydrogenase [ubiquinone] 1 alpha subcomplex subunit 2                                              |
| 0 | P85094  | Isochorismatase domain-containing protein 2A, mitochondrial                                               |

|                  |            |
|------------------|------------|
| Sypa1            | mmu:67043  |
| C2cd5            | mmu:74741  |
| lqsec1           | mmu:232222 |
| Rab23            |            |
| Gas1             | mmu:14451  |
| Znf61            | mmu:195018 |
| Med31            | mmu:67272  |
| Ston1            | mmu:77057  |
| Tcigr1           | mmu:27060  |
| Ankrd13a         | mmu:68420  |
| Syngn            | mmu:217030 |
| Mob4             | mmu:19070  |
| Coq5             | mmu:238123 |
| Pfkf             | mmu:56421  |
| Smarc1           | mmu:54380  |
| Tdrd1            | mmu:83561  |
| Hspu1            | mmu:64209  |
| Plec             | mmu:18810  |
| Fxyd5            | mmu:18301  |
| Dzip3            | mmu:224170 |
| C330007P06Rik    |            |
| Mrlp32           | mmu:75398  |
| Hmgal1           | mmu:15361  |
| Ltn1             | mmu:78913  |
| Vcpkmt           | mmu:207965 |
| Capn11           | mmu:268958 |
| Rabb8b           | mmu:235442 |
| Nt2              | mmu:72083  |
| Slc19a2          | mmu:116914 |
| Exosc7           | mmu:66446  |
| Baq4             | mmu:67384  |
| Mpr14            | mmu:64659  |
| Ttc5             | mmu:219022 |
| Pacs1            | mmu:107975 |
| Emrp1            | mmu:79452  |
| Cdc42ep4         | mmu:226090 |
| Anks1;Ank        | mmu:224650 |
| Ppil2            | mmu:66053  |
| Abi2             | mmu:32916  |
| Nfkfb1           | mmu:18036  |
| Ank1b8;Ak        | mmu:14187  |
| Tmem31           | mmu:13837  |
| Usp1             | mmu:15482  |
| Kanu             | mmu:69612  |
| Trappc6b         | mmu:78232  |
| Cpne1            | mmu:26669  |
| Adck4            |            |
| Pdn2             | mmu:11920  |
| Clk1             | mmu:12747  |
| Pdk1b            | mmu:13420  |
| Bckdk            | mmu:12041  |
| Cdk20            | mmu:105270 |
| Pdgrfa           | mmu:18595  |
| Panc3            | mmu:75857  |
| Sbk3             | mmu:321883 |
| Stylk1           | mmu:214365 |
| Tlgtr2           | mmu:218313 |
| Rio3             | mmu:66878  |
| Aurbk            | mmu:20877  |
| Ttk              | mmu:240086 |
| Ilf1l;Erbb2;Erbb | mmu:13866  |
| Adrbk1;Adk       | mmu:110305 |
| Mapk35           | mmu:26408  |
| Pdpk1            | mmu:18607  |
| Cdk13            | mmu:69662  |
| Chk1             | mmu:12649  |
| Dapk3            | mmu:13844  |
| Ephb2;Eph        | mmu:13649  |
| Mark2            | mmu:137278 |
| Prkci            | mmu:22387  |
| Pisp5k1a         | mmu:11652  |
| Strada           | mmu:72149  |
| Hsp47            | mmu:25921  |
| Mapk4            | mmu:207561 |
| Cannk2           | mmu:76367  |
| 281040M8         | mmu:69131  |
| Kalrn            | mmu:54515  |
| Cdk12            | mmu:69131  |
| Raf1             | mmu:31015  |
| Mapk42           | mmu:126412 |
| Cdk16            | mmu:18555  |
| Aurka            | mmu:20878  |
| Ephb3            | mmu:134875 |
| Bmp2k            | mmu:104780 |
| Ikkb1            | mmu:16150  |
| ec;Fgf1;Fgf2     | mmu:14182  |
| Prkci            | mmu:19129  |
| Prkci            | mmu:58026  |
| Prkci            | mmu:18759  |
| Slc17b7          | mmu:98267  |
| Cdk14            | mmu:18647  |
| Slc2k5           | mmu:59041  |
| Mapk9            | mmu:22480  |
| Baz1b            | mmu:232485 |
| Pipk2b           | mmu:166725 |
| Lhr2             | mmu:108008 |
| Cnsp5            | mmu:94244  |
| Rncp3            | mmu:67325  |
| Talpo1           | mmu:21051  |
| Rel1             | mmu:20353  |
| Ppw2i            | mmu:23883  |
| Polg             |            |
| Polr3e           | mmu:26939  |
| Rbpc1            | mmu:12493  |
| Tf2a;Tf2b        | mmu:12424  |
| Csrp2            | mmu:21308  |
| Tf3              | mmu:23077  |
| Rrb1a            | mmu:53869  |
| Rntx0            | mmu:227655 |
| Renob            | mmu:216840 |
| Gnatp            | mmu:17844  |
| Unsp1            | mmu:14742  |
| Jaf              | mmu:68026  |
| Ndufa2           | mmu:17991  |
|                  | mmu:66490  |



|      |         |         |         |         |
|------|---------|---------|---------|---------|
| 3518 | NaN     | NaN     | NaN     | -1.8664 |
| 3519 | NaN     | NaN     | NaN     | -1.8591 |
| 3520 | NaN     | NaN     | NaN     | -1.8080 |
| 3521 | NaN     | -1.5020 | 0.3737  | -1.8062 |
| 3522 | -1.7948 | NaN     | NaN     | -1.7948 |
| 3523 | NaN     | NaN     | NaN     | -1.7779 |
| 3524 | -0.2671 | NaN     | NaN     | -1.7597 |
| 3525 | -1.1277 | NaN     | NaN     | -1.7321 |
| 3526 | NaN     | -1.6229 | -1.2779 | -1.7004 |
| 3527 | -1.6784 | NaN     | NaN     | -1.6784 |
| 3528 | -1.6662 | NaN     | NaN     | -1.6662 |
| 3529 | -1.2544 | NaN     | -1.9014 | -1.5779 |
| 3530 | NaN     | -1.9972 | -1.1312 | -1.5592 |
| 3531 | NaN     | -1.5588 | NaN     | -1.5587 |
| 3532 | -1.5442 | NaN     | NaN     | -1.5442 |
| 3533 | -1.0231 | NaN     | NaN     | -1.5291 |
| 3534 | NaN     | -1.6775 | -0.3181 | -1.4979 |
| 3535 | NaN     | -4.5616 | 2.2719  | -1.4883 |
| 3536 | -1.4847 | NaN     | NaN     | -1.4847 |
| 3537 | -2.4107 | NaN     | NaN     | -1.4804 |
| 3538 | -1.4733 | NaN     | NaN     | -1.4733 |
| 3539 | NaN     | -0.4731 | NaN     | -1.4398 |
| 3540 | -0.6933 | NaN     | NaN     | -1.4341 |
| 3541 | NaN     | NaN     | -1.4128 | -1.4128 |
| 3542 | NaN     | -1.6122 | -1.1884 | -1.4004 |
| 3543 | -1.3868 | NaN     | NaN     | -1.3860 |
| 3544 | NaN     | NaN     | NaN     | -1.3802 |
| 3545 | -1.3500 | NaN     | NaN     | -1.3500 |
| 3546 | -1.3385 | NaN     | NaN     | -1.3385 |
| 3547 | -1.3234 | NaN     | NaN     | -1.3234 |
| 3548 | -1.3228 | NaN     | NaN     | -1.3228 |
| 3549 | NaN     | NaN     | 0.8828  | -1.3140 |
| 3550 | -1.3115 | NaN     | NaN     | -1.3115 |
| 3551 | NaN     | -1.1196 | -1.4849 | -1.3073 |
| 3552 | -1.6577 | NaN     | NaN     | -1.2995 |
| 3553 | -1.3044 | NaN     | -0.9841 | -1.2942 |
| 3554 | -1.2894 | NaN     | NaN     | -1.2894 |
| 3555 | -0.8623 | NaN     | -1.2070 | -1.2847 |
| 3556 | NaN     | -1.2828 | NaN     | -1.2828 |
| 3557 | -1.7882 | NaN     | -0.1095 | -1.2782 |
| 3558 | -1.2727 | NaN     | NaN     | -1.2727 |
| 3559 | NaN     | -0.2104 | -1.4297 | -1.2710 |
| 3560 | -1.2639 | NaN     | NaN     | -1.2639 |
| 3561 | -0.7240 | NaN     | NaN     | -1.2501 |
| 3562 | NaN     | NaN     | -1.2490 | -1.2490 |
| 3563 | NaN     | NaN     | -0.7398 | -1.2189 |
| 3564 | NaN     | -0.2135 | NaN     | -1.2135 |
| 3565 | -1.2125 | NaN     | NaN     | -1.2125 |
| 3566 | NaN     | NaN     | NaN     | -1.2073 |
| 3567 | NaN     | -1.2093 | NaN     | -1.2062 |
| 3568 | -0.7373 | NaN     | -1.6733 | -1.2053 |
| 3569 | -1.1862 | NaN     | NaN     | -1.1862 |
| 3570 | -1.1855 | NaN     | NaN     | -1.1855 |
| 3571 | NaN     | NaN     | -0.5974 | -1.1787 |
| 3572 | -1.1751 | NaN     | NaN     | -1.1751 |
| 3573 | NaN     | NaN     | NaN     | -1.1621 |
| 3574 | NaN     | -0.4927 | -0.8250 | -1.1589 |
| 3575 | NaN     | -1.4355 | -0.5354 | -1.1442 |
| 3576 | -1.1440 | NaN     | NaN     | -1.1440 |
| 3577 | -0.2874 | NaN     | NaN     | -1.1327 |
| 3578 | -1.4212 | NaN     | -0.8143 | -1.1167 |
| 3579 | -2.0510 | NaN     | NaN     | -1.1135 |
| 3580 | NaN     | NaN     | NaN     | -1.1124 |
| 3581 | NaN     | -1.0292 | -1.1834 | -1.1133 |
| 3582 | NaN     | -1.0924 | NaN     | -1.0924 |
| 3583 | NaN     | NaN     | NaN     | -1.0909 |
| 3584 | NaN     | -0.0881 | NaN     | -1.0889 |
| 3585 | -1.0793 | NaN     | NaN     | -1.0792 |
| 3586 | -1.0781 | NaN     | NaN     | -1.0781 |
| 3587 | NaN     | NaN     | NaN     | -1.0753 |
| 3588 | NaN     | -1.5328 | -0.6107 | -1.0718 |
| 3589 | -1.0715 | NaN     | NaN     | -1.0715 |
| 3590 | -1.0609 | NaN     | NaN     | -1.0609 |
| 3591 | NaN     | -0.0865 | -2.0580 | -1.0538 |
| 3592 | NaN     | NaN     | -0.3752 | -1.0382 |
| 3593 | NaN     | -0.0361 | NaN     | -1.0265 |
| 3594 | -0.5858 | NaN     | NaN     | -1.0261 |
| 3595 | -1.0298 | NaN     | NaN     | -1.0228 |
| 3596 | NaN     | -0.4405 | -0.9089 | -1.0209 |
| 3597 | NaN     | 0.1219  | -0.1947 | -1.0133 |
| 3598 | -1.0116 | NaN     | NaN     | -1.0116 |
| 3599 | NaN     | NaN     | NaN     | -1.0048 |
| 3600 | NaN     | -0.6165 | -1.3914 | -1.0040 |
| 3601 | -1.0039 | NaN     | NaN     | -1.0039 |
| 3602 | -0.6020 | NaN     | NaN     | -0.9972 |
| 3603 | -0.9933 | NaN     | NaN     | -0.9937 |
| 3604 | NaN     | NaN     | NaN     | -0.9857 |
| 3605 | NaN     | NaN     | -0.9799 | -0.9799 |
| 3606 | NaN     | NaN     | -0.9779 | -0.9779 |
| 3607 | NaN     | -1.9577 | NaN     | -0.9727 |
| 3608 | NaN     | -0.9676 | NaN     | -0.9676 |
| 3609 | NaN     | -0.3335 | -1.5765 | -0.9550 |
| 3610 | NaN     | NaN     | -0.9494 | -0.9494 |
| 3611 | -0.9485 | NaN     | NaN     | -0.9485 |
| 3612 | NaN     | -0.1499 | -0.2072 | -0.9454 |
| 3613 | -0.9368 | NaN     | NaN     | -0.9369 |
| 3614 | NaN     | -0.3346 | -2.2139 | -0.9300 |
| 3615 | NaN     | -0.2061 | -1.6425 | -0.9243 |
| 3616 | -0.7123 | NaN     | NaN     | -0.9240 |
| 3617 | NaN     | NaN     | -0.9133 | -0.9133 |
| 3618 | -0.1660 | NaN     | NaN     | -0.9081 |
| 3619 | -0.8999 | NaN     | NaN     | -0.8999 |
| 3620 | -1.0347 | NaN     | NaN     | -0.8850 |
| 3621 | -0.8779 | NaN     | NaN     | -0.8779 |
| 3622 | -1.4591 | NaN     | NaN     | -0.8749 |
| 3623 | NaN     | -0.2851 | -0.0599 | -0.8743 |
| 3624 | NaN     | -1.1544 | -0.3802 | -0.8713 |
| 3625 | -0.8688 | NaN     | NaN     | -0.8639 |
| 3626 | NaN     | NaN     | NaN     | -0.8676 |
| 3627 | -0.4540 | NaN     | -0.1098 | -0.8638 |
| 3628 | NaN     | -1.3585 | 0.1306  | -0.8559 |
| 3629 | -0.8552 | NaN     | NaN     | -0.8552 |
| 3630 | NaN     | -1.3244 | NaN     | -0.8513 |
| 3631 | NaN     | NaN     | NaN     | -0.8510 |
| 3632 | NaN     | -0.6205 | -0.6692 | -0.8503 |
| 3633 | NaN     | -1.1544 | -0.3802 | -0.8445 |
| 3634 | -0.8395 | -1.0844 | NaN     | -0.8421 |
| 3635 | -0.8412 | NaN     | NaN     | -0.8417 |
| 3636 | NaN     | NaN     | -0.8372 | -0.8372 |
| 3637 | NaN     | -0.7029 | -0.9517 | -0.8273 |
| 3638 | -0.2847 | NaN     | -0.8484 | -0.8270 |
| 3639 | -0.8260 | NaN     | NaN     | -0.8260 |
| 3640 | -0.3355 | NaN     | NaN     | -0.8184 |
| 3641 | NaN     | NaN     | -0.8081 | -0.8081 |
| 3642 | -0.1696 | NaN     | -0.3848 | -0.8073 |
| 3643 | NaN     | NaN     | -0.8061 | -0.8061 |

|   |             |                                                                                                                   |
|---|-------------|-------------------------------------------------------------------------------------------------------------------|
| 0 | Q9CRD2      | ER membrane protein complex subunit 2                                                                             |
| 0 | Q09910      |                                                                                                                   |
| 0 | Q3U224      |                                                                                                                   |
| 0 | Q80VJ2      | Steroid receptor RNA activator 1                                                                                  |
| 0 | Q8R322      | Nucleoporin GLE1                                                                                                  |
| 0 | QAD0AGYKXMS |                                                                                                                   |
| 0 | Q80UE3      | Mitofusin-2                                                                                                       |
| 0 | E9QJ7E2     |                                                                                                                   |
| 0 | Q6Q477      | Calcium-transporting ATPase                                                                                       |
| 0 | Q8JCIE2     | Zinc finger MIZ domain-containing protein 2                                                                       |
| 0 | Q80Y44      | Probable ATP-dependent RNA helicase DDX10                                                                         |
| 0 | P70261      | Paladin                                                                                                           |
| 0 | Q7TMMK6     | Protein Hook homolog 2                                                                                            |
| 0 | Q8BGR8      | GSK3-beta interaction protein                                                                                     |
| 0 | Q7TUC7-2    |                                                                                                                   |
| 0 | Q8R3C5      | Probable RNA-binding protein 19                                                                                   |
| 0 | Q8QWRL1     | WD repeat-containing protein 73                                                                                   |
| 0 | P10605      | Cathepsin B;Cathepsin B light chain;Cathepsin B heavy chain                                                       |
| 0 | Q6Y5D8      | Rho GTPase-activating protein 10                                                                                  |
| 0 | Q9D2R6      | Cytochrome c oxidase assembly factor 3 homolog, mitochondrial                                                     |
| 0 | Q9D821      | Inhibitor of nuclear factor kappa-B kinase-interacting protein                                                    |
| 0 | Q3TN34      | MICAL-like protein 2                                                                                              |
| 0 | P63013      | Paired mesoderm homeobox protein 1                                                                                |
| 0 | Q3U0D0      | WD repeat-containing protein 41                                                                                   |
| 0 | Q91VW5      | NADH dehydrogenase [ubiquinone] iron-sulfur protein 2, mitochondrial                                              |
| 0 | Q6GVAD0     | LEM domain-containing protein 2                                                                                   |
| 0 | Q9D9T1      | Glutamyl-tRNA(Gln) amidotransferase subunit B, mitochondrial                                                      |
| 0 | Q8K396      | Meiotic nuclear division protein 1 homolog                                                                        |
| 0 | Q6PCM2      | Integrator complex subunit 6                                                                                      |
| 0 | Q0VDT2      | Zinc finger protein 367                                                                                           |
| 0 | Q68FH0      | Plakophilin-4                                                                                                     |
| 0 | Q80TA1      | Ethanolaminephosphotransferase 1                                                                                  |
| 0 | Q8BGY7      | Protein FAM210A                                                                                                   |
| 0 | P09925      | Surf1                                                                                                             |
| 0 | Q5D5W34     | Histone-lysine N-methyltransferase EHMT1                                                                          |
| 0 | Q8K284      | General transcription factor 3C polypeptide 1                                                                     |
| 0 | Q91VE6      | MK167 FHA domain-interacting nuclear phosphoprotein                                                               |
| 0 | Q3T170      | Phospholipase B1, membrane-associated;Phospholipase A2;Lysophospholipase                                          |
| 0 | Q8R1T1      | Charged multivesicular body protein 7                                                                             |
| 0 | Q9CWN7      | CCRA-NOT transcription complex subunit 11                                                                         |
| 0 | Q9D0A3      | Complex III assembly factor LYRM7                                                                                 |
| 0 | Q8VDC0      | Probable leucine-tRNA ligase, mitochondrial                                                                       |
| 0 | Q8C150      | Mediator of RNA polymerase II transcription subunit 19                                                            |
| 0 | Q9J1J1      | Selenoprotein K                                                                                                   |
| 0 | Q8R8M3      | ADP-ribosylation factor-binding protein GGA3                                                                      |
| 0 | Q9G1C1      | Ubiquitin-conjugating enzyme E2 C                                                                                 |
| 0 | Q9CQV5      | Magnesium transporter protein 1                                                                                   |
| 0 | Q7TMMV3     | FAST kinase domain-containing protein 5                                                                           |
| 0 | Q8VE92      | RNA-binding protein 4B                                                                                            |
| 0 | Q8VIG0      | Zinc finger CCHC domain-containing protein 14                                                                     |
| 0 | Q8VEG6      | CCRA-NOT transcription complex subunit 6-like                                                                     |
| 0 | Q61009      | Scavenger receptor class B member 1                                                                               |
| 0 | Q3ZNY4      | Metal transporter CNNM3                                                                                           |
| 0 | Q9Z2I9      | Succinyl-CoA ligase [ADP-forming] subunit beta, mitochondrial                                                     |
| 0 | P97931      | Uracil-DNA glycosylase                                                                                            |
| 0 | Q8RPM0      | Dihydrated-associated activator of morphogenesis 1                                                                |
| 0 | Q3TQJ7      | Uncharacterized protein C9orf78 homolog                                                                           |
| 0 | P55302      | Alpha-2-macroglobulin receptor-associated protein                                                                 |
| 0 | Q9D8C3      | Putative bifunctional UDP-N-acetylglucosamine transferase and deubiquitinase ALG13                                |
| 0 | Q8VCE6      | U3 small nuclear RNA-associated protein 6 homolog                                                                 |
| 0 | Q8QV86      | Integrator complex subunit 8                                                                                      |
| 0 | B2RQG2      |                                                                                                                   |
| 0 | Q8CQ02      | Zinc fingers and homeoboxes protein 3                                                                             |
| 0 | Q9ZD94      | Paralemin-1                                                                                                       |
| 0 | Q8R3U1      | HRAS-like suppressor 3                                                                                            |
| 0 | Q9D915      | Uncharacterized protein C8orf4 homolog                                                                            |
| 0 | Q6R897      | F-box/LRR-repeat protein 19                                                                                       |
| 0 | Q35S88      | Syndecan-4                                                                                                        |
| 0 | Q8R8E4      | Sushi domain-containing protein 6                                                                                 |
| 0 | Q8C0I6      | Ankyrin repeat domain-containing protein SOWAHC                                                                   |
| 0 | Q8Q527      | Guanine nucleotide-binding protein G(i)(G12)(G13) subunit gamma-5                                                 |
| 0 | Q9D0J8      | Parathyrimosin                                                                                                    |
| 0 | Q7TMY4      | THO complex subunit 7 homolog                                                                                     |
| 0 | Q35075      | Down syndrome critical region protein 3 homolog                                                                   |
| 0 | Q9D8Y1      | Transmembrane protein 126A                                                                                        |
| 0 | Q8VCF8      | Adenylate kinase isoenzyme 6                                                                                      |
| 0 | E3XQ24      |                                                                                                                   |
| 0 | Q62311      | Transcription initiation factor TFIID subunit 6                                                                   |
| 0 | Q09199      | Sulfurtransferase;3-mercaptopropylate sulfurtransferase                                                           |
| 0 | Q80Y14      | Glutaredoxin-related protein 5, mitochondrial                                                                     |
| 0 | Q3TPX4      | Exocyst complex component 5                                                                                       |
| 0 | Q80V11      | E3 ubiquitin-protein ligase TRIM56                                                                                |
| 0 | Q8CIV8      | Tubulin-specific chaperone E                                                                                      |
| 0 | Q9R099      | Transducin beta-like protein 2                                                                                    |
| 0 | Q5U4D9      | THO complex subunit 6 homolog                                                                                     |
| 0 | Q93051      | Transcriptional enhancer factor TEF-1;Transcriptional enhancer factor TEF-3;Transcriptional enhancer factor TEF-4 |
| 0 | E5E537      |                                                                                                                   |
| 0 | Q80VP1      | Epsin-1                                                                                                           |
| 0 | Q61578      | NADPH:adenodoxin oxidoreductase, mitochondrial                                                                    |
| 0 | P10630      | Eukaryotic initiation factor 4A-I1;Eukaryotic initiation factor 4A-I1, N-terminally processed                     |
| 0 | Q9CWW0      | Mitochondrial assembly of ribosomal large subunit protein 1                                                       |
| 0 | Q8R6X0      | E3 ubiquitin-protein ligase TRIM23                                                                                |
| 0 | Q8C561      | LMNB1 domain-containing protein 2                                                                                 |
| 0 | Q8BU11      | TOX high mobility group box family member 4                                                                       |
| 0 | Q99MZ7      | Peroxisomal trans-2-enoyl-CoA reductase                                                                           |
| 0 | S4R2X0      |                                                                                                                   |
| 0 | P0R122      | Collagen alpha-2(IV) chain;Canstatin                                                                              |
| 0 | Q3TFD2      | Lysophosphatidylcholine acyltransferase 1                                                                         |
| 0 | P11276      | Fibronectin;Anastellin                                                                                            |
| 0 | Q8R870      | Protein YIPF;Protein YIPF6                                                                                        |
| 0 | Q60862      | Origin recognition complex subunit 2                                                                              |
| 0 | Q62141      | Paired amphipathic helix protein Sin3b                                                                            |
| 0 | P05202      | Aspartate aminotransferase, mitochondrial                                                                         |
| 0 | P63044      | Vesicle-associated membrane protein 2                                                                             |
| 0 | Q3U1JM7     |                                                                                                                   |
| 0 | Q9D0R6      | Intersectin-2                                                                                                     |
| 0 | Q91WN1      | Dnai1 homolog subfamily C member 9                                                                                |
| 0 | Q0H438      | Tetratricopeptide repeat protein 21B                                                                              |
| 0 | Q8VCG3      | WD repeat-containing protein 74                                                                                   |
| 0 | E9QAH1      |                                                                                                                   |
| 0 | Q99M04      | Lipoyl synthase, mitochondrial                                                                                    |
| 0 | Q9CYA6      | Zinc finger CCHC domain-containing protein 8                                                                      |
| 0 | Q8BGR9      | Ubiquitin-like domain-containing CTD phosphatase 1                                                                |
| 0 | Q8R3V2      |                                                                                                                   |
| 0 | Q8VCLW8     | Acyl-CoA synthetase family member 2, mitochondrial                                                                |
| 0 | Q35R74      | Neutral amino acid transporter Amino acid transporter                                                             |
| 0 | P75425      | POU domain protein POU domain, class 2, transcription factor 1                                                    |
| 0 | Q9CKX8      | 60S ribosome subunit biogenesis protein NIP7 homolog                                                              |
| 0 | Q9D074      | E3 ubiquitin-protein ligase MGRN1                                                                                 |
| 0 | Q99P58      | Ras-related protein Rab-27B                                                                                       |
| 0 | Q8R810      | Serine/threonine-protein phosphatase PGAM5, mitochondrial                                                         |
| 0 | Q9QY42      | Mitochondrial import receptor subunit TOM40 homolog                                                               |
| 0 | Q922E6      | FAST kinase domain-containing protein 2                                                                           |
| 0 | Q9D8M3      | Heme transporter HRG1                                                                                             |
| 0 | Q8R8U0      | Transmembrane and TPR repeat-containing protein 3                                                                 |
| 0 | Q9JFK6      | Nectin-1                                                                                                          |

|           |            |
|-----------|------------|
| Emc2      | mmu:66736  |
| Gstt3     | mmu:103140 |
| Apo17eApo | mmu:666348 |
| Sra1      | mmu:24068  |
| Rcor3     | mmu:74412  |
| Mfn2      | mmu:170731 |
| Arl2      | mmu:77004  |
| Atp2b4    | mmu:381290 |
| Zmiz2     | mmu:52915  |
| Ddx10     | mmu:77591  |
| Palad1    | mmu:27355  |
| Hook2     | mmu:170833 |
| Gskip     | mmu:66787  |
| Rbm19     | mmu:74111  |
| Wdr73     | mmu:71968  |
| Ctcb      | mmu:13030  |
| Arhgap10  | mmu:78514  |
| Coa3      | mmu:52469  |
| Ikbip     | mmu:67454  |
| Mical2    | mmu:231830 |
| Prrx1     | mmu:18933  |
| Wdr41     | mmu:218460 |
| Nduf2     | mmu:226646 |
| Lem2      | mmu:224640 |
| Gatb1     | mmu:229457 |
| Mnd1      | mmu:76915  |
| Ints6     | mmu:18130  |
| Znf367    | mmu:238673 |
| Pkp4      | mmu:227937 |
| Ept1      | mmu:28042  |
| Fam210a   | mmu:108654 |
| Surf1     | mmu:20930  |
| Ehmt1     | mmu:77683  |
| Gfzf2     | mmu:233863 |
| Nfkf      | mmu:67949  |
| Pib1      | mmu:665270 |
| Chmp7     | mmu:105513 |
| Cnot11    | mmu:52846  |
| Lyrm7     | mmu:75530  |
| Lars2     | mmu:102436 |
| Med19     | mmu:381379 |
| Selk      | mmu:80795  |
| Gga3      | mmu:260302 |
| Ube2c     | mmu:68612  |
| Magt1     |            |
| Fastkd5   | mmu:380601 |
| Rbm4b     | mmu:66704  |
| Zcchc14   | mmu:142682 |
| Cnot6     | mmu:231464 |
| Scarb1    | mmu:20778  |
| Cnnm3     | mmu:94218  |
| Suc2a     | mmu:20916  |
| Ung       | mmu:22256  |
| Daa1      | mmu:208446 |
|           | mmu:227707 |
| Lrpap1    | mmu:16976  |
| Alg13     | mmu:67574  |
| Utp6      | mmu:216987 |
| Ints8     | mmu:72656  |
| Phf3      | mmu:213109 |
| Zhx3      | mmu:320799 |
| Palm      | mmu:18483  |
| Pla2g16   | mmu:2258   |

|      |         |         |         |         |
|------|---------|---------|---------|---------|
| 3644 | -1.9651 | NaN     | NaN     | -0.8007 |
| 3645 | NaN     | -1.4520 | -0.1445 | -0.7983 |
| 3646 | -0.9722 | NaN     | NaN     | -0.7950 |
| 3647 | -0.7949 | NaN     | NaN     | -0.7949 |
| 3648 | -1.3366 | NaN     | -0.1620 | -0.7934 |
| 3649 | NaN     | -0.5895 | -0.9962 | -0.7929 |
| 3650 | NaN     | NaN     | -0.7890 | -0.7890 |
| 3651 | NaN     | -0.9913 | -0.0359 | -0.7881 |
| 3652 | -0.7858 | NaN     | NaN     | -0.7858 |
| 3653 | -0.7811 | NaN     | NaN     | -0.7811 |
| 3654 | NaN     | -2.0531 | -0.4986 | -0.7771 |
| 3655 | -0.7724 | NaN     | NaN     | -0.7724 |
| 3656 | -0.7647 | NaN     | NaN     | -0.7647 |
| 3657 | -0.7609 | NaN     | NaN     | -0.7609 |
| 3658 | NaN     | -2.1497 | -0.6365 | -0.7596 |
| 3659 | NaN     | -2.4556 | -0.5788 | -0.7576 |
| 3660 | -0.7559 | NaN     | NaN     | -0.7559 |
| 3661 | -0.7539 | NaN     | NaN     | -0.7539 |
| 3662 | NaN     | -0.7532 | NaN     | -0.7532 |
| 3663 | NaN     | -0.7518 | NaN     | -0.7518 |
| 3664 | NaN     | -0.7468 | NaN     | -0.7468 |
| 3665 | NaN     | 1.4244  | 1.0911  | -0.7400 |
| 3666 | NaN     | -0.2367 | -0.7455 | -0.7455 |
| 3667 | NaN     | -0.3644 | -1.1231 | -0.7438 |
| 3668 | -0.2666 | NaN     | -1.2112 | -0.7407 |
| 3669 | -0.2585 | NaN     | -0.3350 | -0.7345 |
| 3670 | NaN     | NaN     | -0.4141 | -0.7306 |
| 3671 | NaN     | NaN     | -0.7169 | -0.7169 |
| 3672 | NaN     | NaN     | NaN     | -0.7162 |
| 3673 | -0.7148 | NaN     | NaN     | -0.7148 |
| 3674 | -0.6721 | NaN     | NaN     | -0.7145 |
| 3675 | -1.2494 | -0.5598 | NaN     | -0.7051 |
| 3676 | NaN     | -0.3189 | -1.0884 | -0.7037 |
| 3677 | NaN     | -0.7131 | -0.6913 | -0.7032 |
| 3678 | -0.1118 | NaN     | NaN     | -0.6976 |
| 3679 | -0.2245 | -0.6681 | NaN     | -0.6894 |
| 3680 | -0.6869 | NaN     | NaN     | -0.6852 |
| 3681 | NaN     | -0.6867 | NaN     | -0.6867 |
| 3682 | NaN     | -1.2408 | -0.1295 | -0.6849 |
| 3683 | NaN     | NaN     | NaN     | -0.6847 |
| 3684 | -0.8263 | NaN     | NaN     | -0.6823 |
| 3685 | NaN     | -0.6820 | NaN     | -0.6820 |
| 3686 | NaN     | -0.7853 | -0.5737 | -0.6795 |
| 3687 | -0.8347 | NaN     | NaN     | -0.6795 |
| 3688 | NaN     | -0.6792 | -0.6709 | -0.6709 |
| 3689 | -0.2848 | NaN     | -1.4836 | -0.6686 |
| 3690 | NaN     | -0.6296 | -1.6221 | -0.6630 |
| 3691 | -0.6568 | NaN     | NaN     | -0.6569 |
| 3692 | NaN     | NaN     | -0.6564 | -0.6564 |
| 3693 | -0.6489 | NaN     | NaN     | -0.6489 |
| 3694 | NaN     | NaN     | -0.6414 | -0.6407 |
| 3695 | NaN     | -0.1165 | -0.0505 | -0.6403 |
| 3696 | -0.1013 | -3.4018 | NaN     | -0.6396 |
| 3697 | -0.1992 | NaN     | -1.0766 | -0.6359 |
| 3698 | NaN     | NaN     | -0.6310 | -0.6310 |
| 3699 | -0.6306 | NaN     | NaN     | -0.6306 |
| 3700 | -0.6268 | NaN     | NaN     | -0.6287 |
| 3701 | NaN     | -1.1634 | NaN     | -0.6252 |
| 3702 | NaN     | -0.4459 | -1.9905 | -0.6222 |
| 3703 | NaN     | -0.0962 | -0.2467 | -0.6218 |
| 3704 | -0.6214 | NaN     | NaN     | -0.6214 |
| 3705 | -0.2955 | NaN     | NaN     | -0.6212 |
| 3706 | -0.4434 | NaN     | NaN     | -0.6189 |
| 3707 | NaN     | -0.2535 | -0.9835 | -0.6185 |
| 3708 | NaN     | -0.1732 | -1.0631 | -0.6182 |
| 3709 | NaN     | -0.5206 | -0.7140 | -0.6172 |
| 3710 | -0.6169 | NaN     | NaN     | -0.6166 |
| 3711 | -0.6112 | NaN     | NaN     | -0.6132 |
| 3712 | -0.6439 | NaN     | NaN     | -0.6129 |
| 3713 | NaN     | -0.3198 | -1.1719 | -0.6113 |
| 3714 | -0.6743 | -0.3401 | NaN     | -0.6093 |
| 3715 | -0.2317 | -0.9841 | NaN     | -0.6080 |
| 3716 | 1.0889  | NaN     | 1.0594  | -0.6075 |
| 3717 | -0.2254 | NaN     | -0.0837 | -0.6070 |
| 3718 | -0.4210 | -0.7861 | NaN     | -0.6036 |
| 3719 | -0.4298 | -0.3348 | NaN     | -0.6024 |
| 3720 | -0.1559 | NaN     | NaN     | -0.5995 |
| 3721 | -0.5937 | NaN     | NaN     | -0.5937 |
| 3722 | -0.5872 | NaN     | NaN     | -0.5872 |
| 3723 | -2.9590 | NaN     | NaN     | -0.5839 |
| 3724 | -0.5760 | NaN     | NaN     | -0.5760 |
| 3725 | -0.5755 | NaN     | NaN     | -0.5755 |
| 3726 | NaN     | NaN     | -0.5540 | -0.5726 |
| 3727 | -0.5730 | NaN     | NaN     | -0.5720 |
| 3728 | -1.2334 | -0.1688 | NaN     | -0.5708 |
| 3729 | -0.2210 | NaN     | NaN     | -0.5706 |
| 3730 | -0.5680 | NaN     | NaN     | -0.5680 |
| 3731 | -0.4004 | NaN     | -0.5592 | -0.5594 |
| 3732 | NaN     | -0.2652 | -0.9470 | -0.5652 |
| 3733 | -0.7161 | NaN     | -1.8774 | -0.5647 |
| 3734 | -0.1682 | -0.6181 | NaN     | -0.5634 |
| 3735 | -0.5615 | NaN     | NaN     | -0.5615 |
| 3736 | NaN     | -0.5042 | -0.6146 | -0.5594 |
| 3737 | NaN     | -0.2076 | -0.7294 | -0.5578 |
| 3738 | NaN     | NaN     | NaN     | -0.5572 |
| 3739 | NaN     | NaN     | -0.4738 | -0.5568 |
| 3740 | NaN     | NaN     | NaN     | -0.5535 |
| 3741 | -0.6324 | NaN     | -1.0299 | -0.5509 |
| 3742 | -0.5504 | NaN     | NaN     | -0.5504 |
| 3743 | -0.5499 | NaN     | NaN     | -0.5499 |
| 3744 | -0.5476 | NaN     | NaN     | -0.5476 |
| 3745 | NaN     | -0.3029 | -1.4020 | -0.5464 |
| 3746 | -0.5409 | NaN     | NaN     | -0.5409 |
| 3747 | NaN     | -1.2609 | -0.1894 | -0.5385 |
| 3748 | -0.5348 | NaN     | NaN     | -0.5349 |
| 3749 | NaN     | -0.5313 | NaN     | -0.5337 |
| 3750 | -0.1358 | NaN     | NaN     | -0.5311 |
| 3751 | NaN     | -1.9071 | -0.8416 | -0.5299 |
| 3752 | NaN     | -0.2022 | -0.8502 | -0.5292 |
| 3753 | -1.5095 | NaN     | -2.0549 | -0.5284 |
| 3754 | -1.5322 | -0.1388 | NaN     | -0.5272 |
| 3755 | NaN     | NaN     | -0.5256 | -0.5256 |
| 3756 | -0.5235 | NaN     | NaN     | -0.5225 |
| 3757 | NaN     | -1.6336 | -0.5907 | -0.5215 |
| 3758 | -0.5192 | NaN     | NaN     | -0.5192 |
| 3759 | -0.5181 | NaN     | NaN     | -0.5181 |
| 3760 | -1.3926 | -0.4173 | NaN     | -0.5176 |
| 3761 | NaN     | -0.8423 | -0.1919 | -0.5171 |
| 3762 | -0.3891 | NaN     | -0.6442 | -0.5166 |
| 3763 | -0.5158 | NaN     | NaN     | -0.5158 |
| 3764 | -0.5131 | NaN     | NaN     | -0.5131 |
| 3765 | NaN     | -0.3096 | -0.7113 | -0.5104 |
| 3766 | -0.6737 | -1.6848 | NaN     | -0.5055 |
| 3767 | NaN     | NaN     | -0.9915 | -0.5044 |
| 3768 | NaN     | -0.5146 | -1.5174 | -0.5014 |
| 3769 | NaN     | NaN     | -0.5004 | -0.5004 |

|   |            |                                                                                         |
|---|------------|-----------------------------------------------------------------------------------------|
| 0 | Q924H7     | WW domain-containing adapter protein with coiled-coil                                   |
| 0 | D326D0     |                                                                                         |
| 0 | Q810V0     | U3 small nucleolar ribonucleoprotein protein MPP10                                      |
| 0 | L7N236     |                                                                                         |
| 0 | P56960     | Exosome component 10                                                                    |
| 0 | P035242    | Protein FAN                                                                             |
| 0 | Q695C09    | Glucose-6-phosphatase 3                                                                 |
| 0 | Q019V5     | Serine protease HTRA2, mitochondrial                                                    |
| 0 | Q08L74     | General transcription factor 3C polypeptide 2                                           |
| 0 | Q01LC6     | Thyrotroph embryonic factor                                                             |
| 0 | Q54754     | Aldehyde oxidase 1                                                                      |
| 0 | P84091     | AP-2 complex subunit mu                                                                 |
| 0 | G5E8P0     |                                                                                         |
| 0 | Q092E1     | Methyl-CpG-binding domain protein 2                                                     |
| 0 | Q9CX60     | Protein LbH                                                                             |
| 0 | Q91VU0     | Protein FAM3C                                                                           |
| 0 | Q6C9P6     | Inhibitor of Bruton tyrosine kinase                                                     |
| 0 | Q08R22     | Cirhin                                                                                  |
| 0 | Q3U0K1     | TRAF-type zinc finger domain-containing protein 1                                       |
| 0 | P83877     | Thioredoxin-like protein 4A                                                             |
| 0 | Q09178     | Differentially expressed in FDCP 8                                                      |
| 0 | Q54879     | High mobility group protein B3                                                          |
| 0 | Q6NWW5     | Kinesin-like protein KIF24                                                              |
| 0 | Q6CQW07    |                                                                                         |
| 0 | Q09WU40    | Inner nuclear membrane protein Man1                                                     |
| 0 | P091335    | TFIIH basal transcription factor complex helicase XPB subunit                           |
| 0 | Q8C9C6     | Ras association domain-containing protein 8                                             |
| 0 | Q09D2N9    | Vascular protein sorting-associated protein 33A                                         |
| 0 | Q01W78     | RNA-binding protein 47                                                                  |
| 0 | Q80UU1     | Ankyrin repeat and zinc finger domain-containing protein 1                              |
| 0 | Q70157     | DNA topoisomerase;DNA topoisomerase 3-alpha                                             |
| 0 | Q09D211    | COX2AIP N-terminal-like protein                                                         |
| 0 | Q88X17     | ADP-ribosylation factor-related protein 1                                               |
| 0 | Q88XQ2     | GPI transamidase component PIG-T                                                        |
| 0 | Q81Z74     | Mitochondrial ribonuclease P protein 3                                                  |
| 0 | Q9CJ2T5    | Proteasome maturation protein                                                           |
| 0 | Q09124     | Ubiquitin-conjugating enzyme E2 J1                                                      |
| 0 | P04946     | Receptor-type tyrosine-protein phosphatase epsilon                                      |
| 0 | P97371     | Proteasome activator complex subunit 1                                                  |
| 0 | Q922Y8     | Proline synthase co-transcribed bacterial homolog protein                               |
| 0 | E9Q0D4     |                                                                                         |
| 0 | Q020R4     | Intersectin-1                                                                           |
| 0 | Q8R179     | Kelch repeat and BTB domain-containing protein 4                                        |
| 0 | Q5UAK0     | Mesoderm induction early response protein 1                                             |
| 0 | Q9Q2CW0    | Phospholipid-transporting ATPase;Phospholipid-transporting ATPase 11C                   |
| 0 | P030276    | G2/M-totic-specific cyclin-B2                                                           |
| 0 | Q88LV8     | Protein GPR107                                                                          |
| 0 | Q01I00     | DNA polymerase eta                                                                      |
| 0 | Q8C021     | Protein TTFG3                                                                           |
| 0 | Q099M87    | DnaI homolog subfamily A member 3, mitochondrial                                        |
| 0 | Q4VC33     | Macrophage erythroidal attacker                                                         |
| 0 | Q9CQR4     | Acyl-coenzyme A thioesterase 13;Acyl-coenzyme A thioesterase 13, N-terminally processed |
| 0 | Q88HL7     | CDC42 small effector protein 1                                                          |
| 0 | Q8C398     | Phosphatidylinositol-glycan biosynthesis class W protein                                |
| 0 | Q9D5T0     | ATPase family AAA domain-containing protein 1                                           |
| 0 | Q9P0D03    | Serine/threonine-protein phosphatase 2A 56 kDa regulatory subunit alpha isoform         |
| 0 | Q01W59     | RNA-binding motif, single-stranded-interacting protein 1                                |
| 0 | Q8VCN9     | Tubulin-specific chaperone C                                                            |
| 0 | E9Q0P9     |                                                                                         |
| 0 | Q88M72     | Heat shock 70 kDa protein 13                                                            |
| 0 | Q92059     | Prelylated Rab acceptor protein 1                                                       |
| 0 | Q921G3     | V-type proton ATPase subunit C 1                                                        |
| 0 | Q090L6     | Pericentriolar material 1 protein                                                       |
| 0 | Q9D8N9     | Probable ATP-dependent RNA helicase DDX59                                               |
| 0 | A2A0R07    |                                                                                         |
| 0 | Q88M77     | Cell growth regulator with RING finger domain protein 1                                 |
| 0 | P06762     | Mortality factor 4-like protein 1                                                       |
| 0 | Q80HP6     | Polyhomeotic-like protein 3                                                             |
| 0 | Q9DC24     | Apolipoprotein O                                                                        |
| 0 | A2R7L5     | Arginine/serine-rich coiled-coil protein 2                                              |
| 0 | Q6P458     | Integrator complex subunit 1                                                            |
| 0 | P10417     | Apoptosis regulator Bcl-2                                                               |
| 0 | E9Q6R4     |                                                                                         |
| 0 | P0D0V2     |                                                                                         |
| 0 | P21107     | Tropomyosin alpha-3 chain                                                               |
| 0 | Q8R150     | Ubiquinone biosynthesis monooxygenase COQ6, mitochondrial                               |
| 0 | Q9D7J9     | Enoyl-CoA hydratase domain-containing protein 3, mitochondrial                          |
| 0 | P56581     | G/T mismatch-specific thymine DNA glycosylase                                           |
| 0 | Q80X32     | UPF061 protein Csf24 homolog                                                            |
| 0 | Q3U1U2     | NADH dehydrogenase [ubiquinone] 1 beta subcomplex subunit 6                             |
| 0 | Q3U699     | Protein C21orf2 homolog                                                                 |
| 0 | P56371     | Ras-related protein Rab-4A                                                              |
| 0 | Q8C735     | Protein lin-9 homolog                                                                   |
| 0 | Q8R158     | Mad2-binding protein                                                                    |
| 0 | Q88236     | RAD50-interacting protein 1                                                             |
| 0 | P97329     | Kinesin-like protein KIF20A                                                             |
| 0 | Q01Y70     | NADH dehydrogenase [ubiquinone] flavoprotein 1, mitochondrial                           |
| 0 | Q92207     | Protein diaphanous homolog 3                                                            |
| 0 | P93429     | TNF receptor-associated factor 2                                                        |
| 0 | Q92148     | Histone-lysine N-methyltransferase EHMT2                                                |
| 0 | Q8C181     | Calmodulin-regulated spectrin-associated protein 2                                      |
| 0 | A0A180G585 |                                                                                         |
| 0 | Q9CV28     | Protein FAM188A                                                                         |
| 0 | Q88G17     | Survival of motor neuron-related-splicing factor 30                                     |
| 0 | Q88559     | Menin                                                                                   |
| 0 | P412128    | Forhead box protein K1                                                                  |
| 0 | Q01U44     | DNA methyltransferase 1-associated protein 1                                            |
| 0 | Q9CR62     | Mitochondrial 2-oxoglutarate/malate carrier protein                                     |
| 0 | Q88GQ6     | EF-hand calcium-binding domain-containing protein 14                                    |
| 0 | A2A791     | Zinc finger MYM-type protein 4                                                          |
| 0 | Q9QYC5     | Kinetochore-associated protein DSN1 homolog                                             |
| 0 | Q61329     | Zinc finger homeobox protein 3                                                          |
| 0 | Q9D486     | C-Maf-inducing protein                                                                  |
| 0 | Q77QK5     | Coiled-coil domain-containing protein 93                                                |
| 0 | Q88T77     | Serine/threonine-protein phosphatase 6 regulatory ankyrin repeat subunit C              |
| 0 | Q9CQE1     | Protein NipSnap homolog 3B                                                              |
| 0 | Q88R64     | F-box only protein 2B                                                                   |
| 0 | Q9CP26     | ORML1-like protein 3                                                                    |
| 0 | Q920P7     | Suppressor of fused homolog                                                             |
| 0 | P53798     | Squalene synthase                                                                       |
| 0 | Q9CRA9     | FGFR1 oncogene partner 2 homolog                                                        |
| 0 | Q91MB0     | G kinase-anchoring protein 1                                                            |
| 0 | Q8R395     | COMM domain-containing protein 5                                                        |
| 0 | Q88FW4     | Tripartite motif-containing protein 65                                                  |
| 0 | A2ANX3     | Phospholipid-transporting ATPase                                                        |
| 0 | Q99KN2     | Probable cytosolic iron-sulfur protein assembly protein CIAO1                           |
| 0 | Q9CUL6     | OTU domain-containing protein 1                                                         |
| 0 | A2A025     | Sickle tail protein                                                                     |
| 0 | Q80T4E     | Signal-induced proliferation-associated 1-like protein 2                                |
| 0 | Q64321     | Zinc finger and BTB domain-containing protein 7B                                        |
| 0 | P28704     | Retinoic acid receptor RXR-beta                                                         |
| 0 | Q9D710     | Thioredoxin-related transmembrane protein 2                                             |
| 0 | Q77N22     | Thioredoxin domain-containing protein 16                                                |
| 0 | Q9CY77     | Protein slowmo homolog 2                                                                |
| 0 | Q8R3W5     | tRNA-splicing endonuclease subunit Sen15                                                |
| 0 | P48758     | Carbonyl reductase [NADPH] 1                                                            |

|                                                                                   |            |   |  |   |
|-----------------------------------------------------------------------------------|------------|---|--|---|
| Wac                                                                               | mmu:225131 |   |  |   |
| N6amt1                                                                            |            |   |  |   |
| Mphosph1                                                                          | mmu:67973  |   |  |   |
| Gm15127;Gm15114;Gm10439;Ott;Luzp4;Gm15097;Gm15107;Gm15091;Gm15093;Gm15080;Gm15128 |            |   |  |   |
| Exoc10                                                                            | mmu:50912  |   |  |   |
| Nsmf                                                                              | mmu:18201  |   |  |   |
| G6pc3                                                                             | mmu:68401  |   |  |   |
| Htra2                                                                             | mmu:64704  | 1 |  |   |
| Gm29609                                                                           | mmu:71752  |   |  |   |
| Tef                                                                               | mmu:21685  |   |  |   |
| Aox1                                                                              | mmu:11761  | 1 |  |   |
| Ap2m1                                                                             | mmu:11773  |   |  |   |
| Tubgcp6                                                                           | mmu:328580 |   |  |   |
| Mbd2                                                                              | mmu:17191  |   |  |   |
| Lbh                                                                               | mmu:77889  |   |  |   |
| Fam3c                                                                             | mmu:27999  |   |  |   |
| Irbt                                                                              | mmu:108837 |   |  |   |
| Cirh1a                                                                            | mmu:21771  |   |  |   |
| Traf1                                                                             | mmu:231712 |   |  |   |
| Txn14a                                                                            | mmu:27366  |   |  |   |
| Def8                                                                              | mmu:23854  |   |  |   |
| Hmgb3                                                                             | mmu:15354  |   |  |   |
| Kif24                                                                             | mmu:109242 |   |  |   |
| Spcc3                                                                             | mmu:76687  |   |  |   |
| Lemd3                                                                             | mmu:380664 |   |  |   |
| Erc3c                                                                             | mmu:13872  | 1 |  | 1 |
| Rassf8                                                                            | mmu:71323  |   |  |   |
| Vps33a                                                                            | mmu:75753  |   |  |   |
| Rbm47                                                                             | mmu:245945 |   |  |   |
| Ankzf1                                                                            | mmu:52231  |   |  |   |
| Top3a                                                                             | mmu:21975  |   |  |   |
| Cdkn2aip                                                                          | mmu:52626  |   |  |   |
| Arfrp1                                                                            | mmu:76688  |   |  |   |
| Pigt                                                                              | mmu:78928  |   |  |   |
| 1110008L1                                                                         | mmu:66132  |   |  |   |
| Pomp                                                                              | mmu:66537  |   |  |   |
| Ube2j1                                                                            | mmu:56228  |   |  | 1 |
| Ptpre                                                                             | mmu:19267  | 1 |  |   |
| Psmc1                                                                             | mmu:19186  |   |  |   |
| Prosc                                                                             | mmu:114863 |   |  |   |
| Sbf2                                                                              |            |   |  |   |
| Itns1                                                                             | mmu:16443  |   |  |   |
| Kbtbd4                                                                            | mmu:67136  |   |  |   |
| Mier1                                                                             | mmu:71148  |   |  |   |
| Atp11c                                                                            | mmu:320940 |   |  |   |
| Cnrb2                                                                             | mmu:12442  |   |  |   |
| Gpr107                                                                            | mmu:277463 |   |  |   |
| Polh                                                                              | mmu:80905  |   |  |   |
| Ifg3                                                                              | mmu:106581 |   |  |   |
| Dnaja3                                                                            | mmu:83945  |   |  |   |
| Maea                                                                              | mmu:59003  |   |  |   |
| Acot13                                                                            | mmu:66834  |   |  |   |
| Cdc42se1                                                                          | mmu:57912  |   |  |   |
| Pigw                                                                              | mmu:70325  |   |  |   |
| Atad1                                                                             | mmu:67979  |   |  |   |
| Ppp2r5a                                                                           | mmu:226849 |   |  |   |
| Rbm51                                                                             | mmu:56878  |   |  |   |
| Tbcc                                                                              | mmu:72726  |   |  |   |
| Cu9                                                                               |            |   |  |   |
| Hspa13                                                                            | mmu:110920 |   |  |   |
| Rabac1                                                                            | mmu:14470  |   |  |   |
| Atp6v1c1                                                                          | mmu:66335  |   |  |   |
| Pcm1                                                                              | mmu:18536  |   |  |   |
| Ddx59                                                                             | mmu:67997  |   |  |   |
| Ssb                                                                               |            |   |  |   |
| Cgrrf1                                                                            | mmu:68755  |   |  |   |
| Morf411                                                                           | mmu:21761  |   |  |   |
| Phc3                                                                              | mmu:241915 |   |  |   |
| Apoo                                                                              | mmu:68316  |   |  |   |
| Rurc2                                                                             | mmu:208606 |   |  |   |
| Itns1                                                                             | mmu:68510  |   |  |   |
| Bcl2                                                                              | mmu:12043  | 1 |  | 1 |
| Arid1b                                                                            |            |   |  |   |
| Ifi204                                                                            |            |   |  |   |
| Tpm3                                                                              | mmu:59069  |   |  |   |
| Coq6                                                                              | mmu:217707 |   |  |   |
| Echdc3                                                                            | mmu:67856  |   |  |   |
| Tdg                                                                               | mmu:21665  |   |  |   |
|                                                                                   | mmu:78521  |   |  |   |
| Ndufb6                                                                            | mmu:230075 |   |  |   |
| 1810043G1                                                                         | mmu:67884  |   |  |   |
| Rab4a                                                                             | mmu:19341  |   |  |   |
| Lin9                                                                              |            |   |  |   |
| Mtbp                                                                              | mmu:105837 |   |  |   |
| Rint1                                                                             | mmu:72772  |   |  |   |
| Kif20a                                                                            | mmu:19348  |   |  |   |
| Ndufv1                                                                            | mmu:17995  |   |  |   |
| Diap3;Diap                                                                        | mmu:56419  |   |  |   |
| Traf2                                                                             | mmu:22030  | 1 |  | 1 |
| Hmnl2                                                                             | mmu:110147 |   |  | 1 |
| Camsap2                                                                           |            |   |  |   |
| Zbtb45                                                                            |            |   |  |   |
| Fam188a                                                                           | mmu:66960  |   |  |   |
| Smndc1                                                                            | mmu:76479  |   |  |   |
| Men1                                                                              | mmu:17283  |   |  | 1 |
| Foxk1                                                                             | mmu:17425  |   |  |   |
| Dmap1                                                                             | mmu:66233  |   |  |   |
| Slc25a11                                                                          | mmu:67863  |   |  |   |
| Efcab14                                                                           |            |   |  |   |
| Zmyrn4                                                                            | mmu:67785  |   |  |   |
| Dsn1                                                                              | mmu:66994  |   |  |   |
| Zbtb3                                                                             |            |   |  |   |
| Cnlp                                                                              | mmu:74440  |   |  |   |
| Ccdc93                                                                            | mmu:70829  |   |  |   |
| Ankrd52                                                                           | mmu:237615 |   |  |   |
| Nipsnap3b                                                                         | mmu:66536  |   |  |   |
| Fbxo28                                                                            | mmu:67948  |   |  |   |
| Ormdl3                                                                            | mmu:66612  |   |  |   |
| Sufu                                                                              | mmu:24069  |   |  |   |
| Fdft1                                                                             | mmu:14137  |   |  |   |
| Fgfr1op2                                                                          | mmu:67529  |   |  |   |
| Gkap1                                                                             | mmu:56278  |   |  |   |
| Commf5                                                                            | mmu:66398  |   |  |   |
| Trim65                                                                            | mmu:338364 |   |  |   |
| Atp8b4                                                                            | mmu:241633 |   |  |   |
| Ciao1                                                                             | mmu:26371  |   |  |   |
| Ottd1                                                                             | mmu:71198  |   |  |   |
| Et4;Sk1                                                                           | mmu:208618 |   |  |   |
| Sipa1l2                                                                           | mmu:244668 |   |  |   |
| Zbtb7b                                                                            | mmu:22724  |   |  |   |
| Rorb                                                                              | mmu:20182  |   |  |   |
| Tma2                                                                              | mmu:66958  |   |  |   |
| Txndc16                                                                           | mmu:70561  |   |  |   |
| Slmo2                                                                             | mmu:66390  |   |  |   |
| Tsen15                                                                            | mmu:66637  |   |  |   |
| Cbr1                                                                              | mmu:12408  |   |  |   |

|      |         |         |         |         |
|------|---------|---------|---------|---------|
| 3770 | -0.3714 | NaN     | NaN     | -0.4995 |
| 3771 | NaN     | -0.6539 | -1.0491 | -0.4952 |
| 3772 | NaN     | -0.7270 | -0.2549 | -0.4910 |
| 3773 | -0.6380 | NaN     | NaN     | -0.4909 |
| 3774 | NaN     | -0.1946 | -0.7868 | -0.4907 |
| 3775 | NaN     | -0.4514 | -0.5288 | -0.4907 |
| 3776 | -0.4888 | NaN     | NaN     | -0.4884 |
| 3777 | -1.0512 | NaN     | NaN     | -0.4865 |
| 3778 | -0.4862 | NaN     | NaN     | -0.4862 |
| 3779 | -2.0651 | NaN     | NaN     | -0.4860 |
| 3780 | -0.4851 | NaN     | NaN     | -0.4851 |
| 3781 | NaN     | -1.0416 | -0.6185 | -0.4836 |
| 3782 | NaN     | NaN     | NaN     | -0.4831 |
| 3783 | NaN     | NaN     | -0.4827 | -0.4827 |
| 3784 | -0.2882 | -1.2524 | NaN     | -0.4823 |
| 3785 | -0.8835 | NaN     | NaN     | -0.4822 |
| 3786 | -1.3039 | NaN     | NaN     | -0.4816 |
| 3787 | -0.2451 | -1.2064 | NaN     | -0.4791 |
| 3788 | -0.4737 | NaN     | NaN     | -0.4737 |
| 3789 | NaN     | -0.7711 | -0.1735 | -0.4725 |
| 3790 | NaN     | -0.5590 | NaN     | -0.4706 |
| 3791 | -1.1010 | -0.4018 | NaN     | -0.4697 |
| 3792 | NaN     | -0.4944 | -0.2488 | -0.4695 |
| 3793 | -0.1059 | -0.3705 | NaN     | -0.4653 |
| 3794 | NaN     | -1.0952 | -0.1654 | -0.4649 |
| 3795 | NaN     | -0.4522 | -0.0788 | -0.4638 |
| 3796 | -0.5259 | NaN     | NaN     | -0.4632 |
| 3797 | -0.9256 | -0.2305 | NaN     | -0.4622 |
| 3798 | -0.4301 | NaN     | -0.4930 | -0.4615 |
| 3799 | NaN     | -0.2329 | -0.6867 | -0.4598 |
| 3800 | -0.0891 | NaN     | NaN     | -0.4595 |
| 3801 | -0.2153 | NaN     | -0.5147 | -0.4590 |
| 3802 | -0.7220 | -0.1951 | NaN     | -0.4587 |
| 3803 | -0.4581 | NaN     | NaN     | -0.4581 |
| 3804 | NaN     | NaN     | -0.9100 | -0.4571 |
| 3805 | NaN     | -0.2227 | -0.6372 | -0.4565 |
| 3806 | -0.0434 | NaN     | -0.1358 | -0.4559 |
| 3807 | -0.2055 | NaN     | -0.4217 | -0.4554 |
| 3808 | NaN     | -0.3715 | -0.5379 | -0.4547 |
| 3809 | NaN     | NaN     | NaN     | -0.4544 |
| 3810 | NaN     | NaN     | -0.4536 | -0.4536 |
| 3811 | NaN     | -0.4528 | NaN     | -0.4528 |
| 3812 | NaN     | -0.4518 | NaN     | -0.4518 |
| 3813 | -1.5874 | NaN     | NaN     | -0.4489 |
| 3814 | -0.4488 | NaN     | -0.4461 | -0.4479 |
| 3815 | NaN     | -0.4468 | NaN     | -0.4467 |
| 3816 | -1.0324 | NaN     | NaN     | -0.4464 |
| 3817 | -0.4445 | NaN     | NaN     | -0.4445 |
| 3818 | -0.4433 | NaN     | NaN     | -0.4433 |
| 3819 | -0.4795 | NaN     | NaN     | -0.4420 |
| 3820 | -0.1533 | NaN     | -0.3041 | -0.4410 |
| 3821 | -0.6209 | -0.2611 | NaN     | -0.4410 |
| 3822 | -0.4388 | NaN     | NaN     | -0.4388 |
| 3823 | -0.1282 | NaN     | NaN     | -0.4356 |
| 3824 | -0.4346 | NaN     | NaN     | -0.4346 |
| 3825 | -0.4332 | NaN     | NaN     | -0.4342 |
| 3826 | NaN     | -0.6185 | -0.6376 | -0.4311 |
| 3827 | -0.0854 | NaN     | NaN     | -0.4310 |
| 3828 | NaN     | -0.9053 | -0.2314 | -0.4307 |
| 3829 | NaN     | -0.6564 | -0.2022 | -0.4293 |
| 3830 | -0.2845 | NaN     | NaN     | -0.4269 |
| 3831 | -0.1277 | -0.1616 | NaN     | -0.4253 |
| 3832 | NaN     | -0.4248 | NaN     | -0.4248 |
| 3833 | -0.4238 | NaN     | NaN     | -0.4183 |
| 3834 | -0.2040 | -0.2929 | NaN     | -0.4182 |
| 3835 | -0.0768 | NaN     | -0.9108 | -0.4171 |
| 3836 | -0.4159 | NaN     | NaN     | -0.4150 |
| 3837 | -1.0059 | NaN     | NaN     | -0.4150 |
| 3838 | NaN     | -0.2075 | -0.6185 | -0.4130 |
| 3839 | -0.4125 | NaN     | NaN     | -0.4125 |
| 3840 | NaN     | -0.2761 | -0.4046 | -0.4115 |
| 3841 | NaN     | -0.2097 | NaN     | -0.4109 |
| 3842 | NaN     | -1.5469 | -0.7282 | -0.4094 |
| 3843 | NaN     | -1.1604 | -0.4042 | -0.4084 |
| 3844 | NaN     | NaN     | -0.4071 | -0.4071 |
| 3845 | NaN     | -0.0957 | -0.0928 | -0.4061 |
| 3846 | NaN     | -0.4048 | NaN     | -0.4049 |
| 3847 | NaN     | NaN     | -0.4022 | -0.4027 |
| 3848 | -0.4076 | NaN     | NaN     | -0.4026 |
| 3849 | NaN     | -0.3228 | -0.4817 | -0.4023 |
| 3850 | NaN     | -0.4748 | -0.3293 | -0.4021 |
| 3851 | -0.3171 | NaN     | NaN     | -0.4002 |
| 3852 | -0.3981 | NaN     | NaN     | -0.3981 |
| 3853 | NaN     | -0.4435 | -0.3515 | -0.3975 |
| 3854 | -0.3931 | NaN     | NaN     | -0.3974 |
| 3855 | NaN     | -0.3508 | -0.1116 | -0.3957 |
| 3856 | NaN     | -0.3509 | -0.0665 | -0.3950 |
| 3857 | -0.3945 | NaN     | NaN     | -0.3945 |
| 3858 | -0.8168 | NaN     | -0.0714 | -0.3927 |
| 3859 | NaN     | -0.3832 | -0.2402 | -0.3916 |
| 3860 | -0.3892 | NaN     | NaN     | -0.3892 |
| 3861 | -0.3889 | NaN     | NaN     | -0.3889 |
| 3862 | NaN     | -0.3972 | -0.3768 | -0.3870 |
| 3863 | NaN     | NaN     | -0.3866 | -0.3866 |
| 3864 | -0.6634 | -0.0864 | NaN     | -0.3856 |
| 3865 | NaN     | NaN     | NaN     | -0.3844 |
| 3866 | NaN     | NaN     | NaN     | -0.3830 |
| 3867 | -0.2367 | NaN     | -1.5804 | -0.3825 |
| 3868 | -0.3754 | NaN     | NaN     | -0.3754 |
| 3869 | -0.3415 | NaN     | NaN     | -0.3752 |
| 3870 | -0.3698 | NaN     | NaN     | -0.3698 |
| 3871 | NaN     | NaN     | -0.6044 | -0.3695 |
| 3872 | -0.2183 | NaN     | -0.1681 | -0.3695 |
| 3873 | -0.3678 | NaN     | NaN     | -0.3678 |
| 3874 | -0.3653 | NaN     | NaN     | -0.3653 |
| 3875 | -0.3653 | NaN     | NaN     | -0.3651 |
| 3876 | NaN     | -0.3937 | -0.3341 | -0.3639 |
| 3877 | NaN     | -0.5116 | NaN     | -0.3627 |
| 3878 | NaN     | NaN     | -0.3589 | -0.3589 |
| 3879 | -0.3088 | NaN     | NaN     | -0.3572 |
| 3880 | NaN     | -0.1470 | -0.5617 | -0.3544 |
| 3881 | NaN     | -1.2331 | -0.5285 | -0.3519 |
| 3882 | -0.3519 | NaN     | NaN     | -0.3519 |
| 3883 | NaN     | -0.3508 | NaN     | -0.3508 |
| 3884 | -0.1301 | NaN     | -0.0779 | -0.3487 |
| 3885 | -0.0934 | NaN     | -0.1667 | -0.3477 |
| 3886 | -0.3458 | NaN     | NaN     | -0.3452 |
| 3887 | NaN     | -0.0987 | -0.5906 | -0.3447 |
| 3888 | -0.3434 | NaN     | NaN     | -0.3434 |
| 3889 | -0.6834 | NaN     | NaN     | -0.3412 |
| 3890 | -0.2502 | NaN     | NaN     | -0.3388 |
| 3891 | -0.3007 | NaN     | NaN     | -0.3380 |
| 3892 | -0.2605 | NaN     | NaN     | -0.3375 |
| 3893 | -0.2829 | NaN     | NaN     | -0.3374 |
| 3894 | -0.1028 | NaN     | -0.2478 | -0.3372 |
| 3895 | -0.4704 | -1.0152 | NaN     | -0.3366 |

|   |            |                                                                      |
|---|------------|----------------------------------------------------------------------|
| 0 | Q9CSP9     | Tetratricopeptide repeat protein 14                                  |
| 0 | Q8BH79     | Anoctamin-10                                                         |
| 0 | Q8V0D4     | GRIP1-associated protein 1                                           |
| 0 | Q8BUJ3     | Leucine-rich repeat and WD repeat-containing protein 1               |
| 0 | Q61160     | FAS-associated death domain protein                                  |
| 0 | D9Y9A7     | Dehydrogenase/reductase SDR family member 7B                         |
| 0 | Q9D0A3     | Mitochondrial glutamate carrier 1                                    |
| 0 | Q9D0A7     | AFG3-like protein 1                                                  |
| 0 | Q9R0C0     | Biogenesis of lysosome-related organelles complex 1 subunit 6        |
| 0 | Q08696     | Forkhead box protein M1                                              |
| 0 | Q8BI56     | Patatin-like phospholipase domain-containing protein 2               |
| 0 | Q8BZN6     | Dedicator of cytokinesis protein 10                                  |
| 0 | Q53216     | Histone H3-like centromeric protein A                                |
| 0 | P9Y315     | Cysteine and glycine-rich protein 1                                  |
| 0 | Q9D0C7     | NADH dehydrogenase [ubiquinone] iron-sulfur protein 7, mitochondrial |
| 0 | Q91WM1     | Spermatid perinuclear RNA-binding protein                            |
| 0 | P9Y352     | Protein S100-A13                                                     |
| 0 | Q8OUK7     | Spindle assembly abnormal protein 6 homolog                          |
| 0 | Q53963     | Ras-related protein Rab-33B                                          |
| 0 | Q78W99     | Ubiquitin domain-containing protein UBFD1                            |
| 0 | Q99X30     | Epidermal growth factor receptor kinase substrate 8-like protein 2   |
| 0 | Q9CQA5     | Mediator of RNA polymerase II transcription subunit 4                |
| 0 | Q55126     | Protein NipSnap homolog 2                                            |
| 0 | Q9E0H2     | Endoplasmic reticulum aminopeptidase 1                               |
| 0 | Q7TMM6     | Cytosolic Fe-S cluster assembly factor NARFL                         |
| 0 | Q9ZCQ6     | Septin-5                                                             |
| 0 | Q9E5W4     | Acylglycerol kinase, mitochondrial                                   |
| 0 | Q8C7Q3     | Intron-binding protein aquarius                                      |
| 0 | Q3UFB2     | Box C/D snoRNA protein 1                                             |
| 0 | EPN1W69    | Epsin-3                                                              |
| 0 | EP9WW99    | Protein capicua homolog                                              |
| 0 | Q924A2     | SUN domain-containing protein 1                                      |
| 0 | Q9D666     | MPN domain-containing protein                                        |
| 0 | Q3TVE5     | 60S ribosomal protein L18a                                           |
| 0 | P6Z717     | Nucleolin                                                            |
| 0 | Q9C7M5     | DAZ-associated protein 1                                             |
| 0 | Q9D1U5     | GC-rich sequence DNA-binding factor 2                                |
| 0 | Q8K8T3     | Carbonic anhydrase 5B, mitochondrial                                 |
| 0 | Q9QZAO     | Integrator complex subunit 10                                        |
| 0 | Q8KZAT     | WD repeat-containing protein 82                                      |
| 0 | Q3US87     | Inactive phospholipase C-like protein 1                              |
| 0 | Q8RZW9     | Pantothenate kinase 3                                                |
| 0 | Q9D8N5     | Lon protease homolog 2, peroxisomal                                  |
| 0 | Q8K007     | Tail-anchored protein insertion receptor WRB                         |
| 0 | Q8K450     | DEP domain-containing protein 1A                                     |
| 0 | Q6A318     | Zinc finger E-box-binding homeobox 1                                 |
| 0 | A6X8Z5     | Rho GTPase-activating protein 1                                      |
| 0 | Q7T700     | Transcription factor SPT20 homolog                                   |
| 0 | Q80Y56     | Actin filament-associated protein 1                                  |
| 0 | Q9CX11     | Probable glutamate-tRNA ligase, mitochondrial                        |
| 0 | Q8VCH6     | Delta(24)-sterol reductase                                           |
| 0 | Q6Z245     | Son of sevenless homolog 1                                           |
| 0 | Q70Z79     | Protein DGCR14                                                       |
| 0 | Q9D8N1     | Uncharacterized protein C11orf24 homolog                             |
| 0 | Q8BRJ3     | Forward box protein B3                                               |
| 0 | Q8BRJ8     | 39S ribosomal protein L22, mitochondrial                             |
| 0 | Q9D864     | Actin-related protein 6                                              |
| 0 | P6Z141     | Serine/threonine-protein phosphatase PP1-beta catalytic subunit      |
| 0 | Q99M87     | RING finger protein 141                                              |
| 0 | Q8BQZ5     | Cleavage and polyadenylation specificity factor subunit 4            |
| 0 | Q6NQC4     | PAX-interacting protein 1                                            |
| 0 | Q8C3W1     | Uncharacterized protein C1orf198 homolog                             |
| 0 | Q91ZEO     | Trimethyllysine dioxygenase, mitochondrial                           |
| 0 | Q9DA15     | Mitochondrial tRNA-specific 2-thiouridylase 1                        |
| 0 | Q5-0544    | Choline kinase alpha                                                 |
| 0 | P60882     | Multiple epidermal growth factor-like domains protein 8              |
| 0 | Q6PFD6     | Kinesin-like protein KIF18B                                          |
| 0 | P35279     | Ras-related protein Rab-6A                                           |
| 0 | Q5H2I9     | Solute carrier family 25 member 51                                   |
| 0 | Q9D0C4     | tRNA (guanine(37)-N1)-methyltransferase                              |
| 0 | Q91WG3     | Probable tRNA pseudouridine synthase 2                               |
| 0 | Q8QZT7     | EKC/KEOPS complex subunit TrpKb                                      |
| 0 | Q8K1J6     | CCA tRNA nucleotidyltransferase 1, mitochondrial                     |
| 0 | Q55153     | BET1-like protein                                                    |
| 0 | Q99M51     | Cytoplasmic protein NCK1                                             |
| 0 | Q91U13     | UDAP-glucuronic acid decarboxylase 1                                 |
| 0 | Q9E5W8     | Pyroglutamy-peptidase 1                                              |
| 0 | Q9C9C8     | NADH dehydrogenase [ubiquinone] 1 beta subcomplex subunit 9          |
| 0 | Q3ULD5     | Methylcrotonoyl-CoA carboxylase beta chain, mitochondrial            |
| 0 | Q99R11     | Sideroflexin-1                                                       |
| 0 | Q3V300     | Kinesin-like protein KIF22                                           |
| 0 | Q61666     | Protein HIRA                                                         |
| 0 | P58774     | Tropomyosin beta chain                                               |
| 0 | Q9DQZ8     | Core histone macro-H2A.1                                             |
| 0 | P61219     | DNA-directed RNA polymerases I, II, and III subunit RPABC2           |
| 0 | Q9C8U5     | Clathrin light chain B                                               |
| 0 | Q70133     | ATP-dependent RNA helicase A                                         |
| 0 | D3YWT1     | Peptidyl-prolyl cis-trans isomerase B                                |
| 0 | P24369     | NADH dehydrogenase [ubiquinone] 1 alpha subcomplex subunit 3         |
| 0 | Q9CQ91     | Mitoferrin-2                                                         |
| 0 | Q8RQZ5     | Choline-phosphate cytidylyltransferase B                             |
| 0 | Q811Q9     |                                                                      |
| 0 | Q543M9     |                                                                      |
| 0 | Q9E0J0     | Two pore calcium channel protein 1                                   |
| 0 | Q715F4     | Leucine-rich repeat-containing protein 75A                           |
| 0 | Q99J27     | Acetyl-coenzyme A transporter 1                                      |
| 0 | Q8CL40     | Rootletin                                                            |
| 0 | A0A087WS29 |                                                                      |
| 0 | Q6ZQF0     | DNA topoisomerase 2-binding protein 1                                |
| 0 | Q9DCK3     | Tetraspanin/Tetraspanin-4                                            |
| 0 | Q7TQK4     | Exosome complex component RRP40                                      |
| 0 | Q3UFM5     | Nuclear MIF4G domain-containing protein 1                            |
| 0 | Q8BP97     | Rhomboid domain-containing protein 3                                 |
| 0 | Q8BW94     | Dynein heavy chain 3, axonemal                                       |
| 0 | Q01147     | Cyclic AMP-responsive element-binding protein 1                      |
| 0 | Q9Q5F9     | Histone-lysine N-methyltransferase SETD2                             |
| 0 | Q9R089     | Procollagen-lysine,2-oxoglutarate 5-dioxygenase 2                    |
| 0 | Q8C954     | Coiled-coil domain-containing protein 186                            |
| 0 | Q6P1J4     | Nuclear factor related to kappa-B-binding protein                    |
| 0 | Q6Z048     | Astrocytic phosphoprotein PEA-15                                     |
| 0 | Q8QZ11     | Ras-related protein Rap-2a                                           |
| 0 | Q99LM9     | Transcriptional adapter 1                                            |
| 0 | P61339     | Nuclear transcription factor Y subunit beta                          |
| 0 | Q9Z258     | Kinesin-like protein KIF2C/Kinesin-like protein                      |
| 0 | Q9JHC9     | ETS-related transcription factor EIf-2                               |
| 0 | Q9D9L3     |                                                                      |
| 0 | Q8K4Z3     | NAD(P)H-hydrate epimerase                                            |
| 0 | Q8R035     | Peptidyl-RNA hydrolase ICT1, mitochondrial                           |
| 0 | Q8B531     | Palmitoyl-protein thioesterase 1                                     |
| 0 | P51432     | 1-phosphatidylinositol 4,5-bisphosphate phosphodiesterase beta-3     |
| 0 | Q8K327     | Chromosome alignment-maintaining phosphoprotein 1                    |
| 0 | Q8R3F5     | Malonyl-CoA-acyl carrier protein transacylase, mitochondrial         |
| 0 | Q6D0D5     | PWWP domain-containing protein MUM1                                  |
| 0 | A2AMZ9     | Protein AF-9                                                         |
| 0 | Q9CZV5     | STAGA complex 65 subunit gamma                                       |

|                            |            |   |
|----------------------------|------------|---|
| Ttc14                      | mmu:67120  |   |
| Ano10                      | mmu:102566 |   |
| Gripap1                    | mmu:54645  |   |
| LRWD1                      | mmu:71735  |   |
| Fadd                       | mmu:14082  |   |
| Dhrs7b                     | mmu:216820 |   |
| Slc25a22                   | mmu:68267  |   |
| Alg3l1                     | mmu:114896 |   |
| Bloc1s6                    | mmu:18457  |   |
| Foxm1                      |            | 1 |
| Pnpla2                     | mmu:66853  |   |
| Dock10                     | mmu:210293 |   |
| Cenpa                      | mmu:12615  |   |
| Csrp1                      | mmu:13007  |   |
| Ndufs7                     | mmu:75406  |   |
| Srbp                       | mmu:20744  |   |
| S100a13                    |            |   |
| Sass6                      | mmu:72776  |   |
| Rab33b                     | mmu:19338  |   |
| Ubf1d1                     | mmu:28018  |   |
| Eps8l2                     | mmu:98845  |   |
| Med4                       | mmu:67381  |   |
| Gbas                       |            |   |
| Erap1                      | mmu:80898  |   |
| Narfl                      | mmu:67563  |   |
| Sept5                      | mmu:18951  |   |
| Agk                        | mmu:69923  |   |
| Aqr                        | mmu:11834  |   |
| Znhit6                     | mmu:229937 |   |
| Epn3;Epn1                  | mmu:71889  |   |
| Rsf1                       | mmu:233532 |   |
| Cic                        | mmu:71722  |   |
| Sun1                       | mmu:77053  |   |
| Mpnrd                      | mmu:68047  |   |
| Rpl18a;Gm                  | mmu:76808  |   |
| Nenf                       | mmu:66208  |   |
| Dazap1                     | mmu:70248  |   |
| Gcfc2                      | mmu:330361 |   |
| Ca5b                       | mmu:56078  |   |
| Ints10                     | mmu:70885  |   |
| Wdr82                      | mmu:77305  |   |
| Pic1c                      | mmu:227120 |   |
| Pank3                      | mmu:211347 |   |
| Lonp2                      | mmu:66887  |   |
| Wrb                        | mmu:71446  |   |
| Depdc1a                    | mmu:76131  |   |
| Zeb1                       | mmu:21417  |   |
| Ahrgap31                   | mmu:12549  |   |
| Supt20h                    | mmu:56790  |   |
| Afp1                       | mmu:70292  |   |
| Ears2                      | mmu:67417  |   |
| Dhcr24                     | mmu:74754  | 1 |
| Sosl                       | mmu:20662  |   |
| Dgcr14                     | mmu:27886  |   |
| Foxj3                      | mmu:72056  |   |
| Mrlp122                    | mmu:216767 |   |
| Actr6                      | mmu:67019  |   |
| Ppp1cb                     | mmu:19046  |   |
| Rnf141                     | mmu:67150  | 1 |
| Cpsf4                      | mmu:54188  |   |
| Paxip1                     | mmu:55982  |   |
|                            | mmu:69551  |   |
| Tmlhe                      | mmu:192289 |   |
| Trmu                       | mmu:72026  |   |
| Chka                       | mmu:12660  |   |
| Megf8                      | mmu:269878 |   |
| Kif18b                     | mmu:70218  |   |
| Rab6a                      | mmu:19346  |   |
| Slc25a51                   | mmu:230125 |   |
| Trmt5                      | mmu:76357  |   |
| Trub2                      | mmu:227682 |   |
| Trpkb                      | mmu:69786  |   |
| Trnt1                      | mmu:70047  |   |
| Bet1l                      | mmu:54399  |   |
| Nck1                       | mmu:17973  |   |
| Uxs1                       | mmu:67883  |   |
| Pgpep1                     | mmu:66522  |   |
| Ndufb9                     | mmu:66218  |   |
| Nccc2                      | mmu:78038  |   |
| Sfen1                      | mmu:14057  |   |
| Kif22                      | mmu:110033 |   |
| Hira                       | mmu:15260  |   |
| Tpm2                       | mmu:22004  |   |
| H2afy                      | mmu:26914  |   |
| Polr2f                     | mmu:69833  |   |
| Cltb                       | mmu:74325  |   |
| Dhx9                       | mmu:13211  |   |
| Hnnrph3                    |            |   |
| Ppib                       | mmu:19035  |   |
| Ndufa3                     | mmu:66591  |   |
| Slc25a28                   | mmu:246696 |   |
| Pcytlb                     | mmu:236899 |   |
| Trp53rk                    | mmu:76367  |   |
| Trpcn1                     | mmu:252972 |   |
| Lrrc75a                    | mmu:192976 |   |
| Slc33a1                    | mmu:11416  |   |
| Crocc                      | mmu:230872 |   |
| Ktn1                       |            |   |
| Topbp1                     | mmu:235559 |   |
| Tspan4                     | mmu:64540  |   |
| Exoc3                      | mmu:66362  |   |
| Nom1                       | mmu:433864 |   |
| Rhbdd3                     | mmu:279766 |   |
| Dnah3;Dnah7a;Dnah7c;Dnah7b |            |   |
| Creb1                      | mmu:12912  |   |
| Setd2                      | mmu:235626 |   |
| Plod2                      | mmu:26432  |   |
| Ccdc186                    | mmu:213993 |   |
| Nfrkb                      | mmu:235134 |   |
| Pea15                      | mmu:18611  |   |
| Rap2a                      | mmu:76108  |   |
| Tada1                      | mmu:27878  |   |
| Nfyb                       | mmu:18045  |   |
| Kif2c                      | mmu:73804  |   |
| Elf2                       | mmu:69257  |   |
| Rbm15                      | mmu:229700 |   |
| Apoa1bp                    | mmu:246703 |   |
| Ict1                       | mmu:68572  |   |
| Pt1t1                      | mmu:19063  |   |
| Pfcb3                      | mmu:18797  |   |
| Champ1                     | mmu:101994 |   |
| Mcat                       | mmu:223722 |   |
| Mum1                       | mmu:68114  |   |
| Mlll3                      | mmu:70122  |   |
| Supt17                     | mmu:72195  |   |

|      |         |         |         |         |
|------|---------|---------|---------|---------|
| 3896 | NaN     | NaN     | -0.3362 | -0.3362 |
| 3897 | -0.0818 | NaN     | -0.7541 | -0.3361 |
| 3898 | NaN     | -0.1558 | -0.2796 | -0.3341 |
| 3899 | NaN     | -0.6351 | NaN     | -0.3299 |
| 3900 | -0.2367 | NaN     | NaN     | -0.3295 |
| 3901 | -0.4046 | NaN     | -0.7128 | -0.3286 |
| 3902 | -0.3767 | NaN     | NaN     | -0.3267 |
| 3903 | NaN     | -0.0735 | -0.5801 | -0.3266 |
| 3904 | -0.3252 | NaN     | NaN     | -0.3252 |
| 3905 | -0.3232 | NaN     | NaN     | -0.3232 |
| 3906 | NaN     | -0.7165 | -0.5880 | -0.3228 |
| 3907 | NaN     | NaN     | NaN     | -0.3226 |
| 3908 | NaN     | -0.3221 | NaN     | -0.3221 |
| 3909 | NaN     | -0.1631 | -0.8062 | -0.3216 |
| 3910 | NaN     | -0.0900 | -0.5520 | -0.3210 |
| 3911 | -0.3205 | NaN     | NaN     | -0.3205 |
| 3912 | -0.7967 | -0.1358 | NaN     | -0.3202 |
| 3913 | NaN     | -0.1953 | NaN     | -0.3201 |
| 3914 | NaN     | NaN     | -0.3194 | -0.3194 |
| 3915 | NaN     | -0.6230 | NaN     | -0.3183 |
| 3916 | -0.2192 | NaN     | -0.8553 | -0.3181 |
| 3917 | -0.1041 | NaN     | NaN     | -0.3179 |
| 3918 | -0.3171 | NaN     | NaN     | -0.3171 |
| 3919 | NaN     | -0.0850 | -0.5612 | -0.3147 |
| 3920 | -0.2180 | -0.6128 | NaN     | -0.3133 |
| 3921 | NaN     | -0.6201 | -0.0339 | -0.3131 |
| 3922 | NaN     | -0.1868 | -0.4395 | -0.3131 |
| 3923 | NaN     | -0.6904 | -1.0837 | -0.3122 |
| 3924 | NaN     | NaN     | -0.5016 | -0.3106 |
| 3925 | NaN     | -0.8962 | -0.2755 | -0.3103 |
| 3926 | -0.3097 | NaN     | NaN     | -0.3097 |
| 3927 | -0.2072 | NaN     | NaN     | -0.3096 |
| 3928 | NaN     | -0.7778 | -0.1612 | -0.3083 |
| 3929 | NaN     | -0.1514 | -0.6778 | -0.3071 |
| 3930 | NaN     | -0.3068 | NaN     | -0.3066 |
| 3931 | -0.3038 | NaN     | NaN     | -0.3039 |
| 3932 | NaN     | -0.5768 | NaN     | -0.3014 |
| 3933 | -0.3008 | NaN     | NaN     | -0.3009 |
| 3934 | -0.3584 | NaN     | NaN     | -0.3002 |
| 3935 | NaN     | -0.3094 | -0.0883 | -0.3000 |
| 3936 | NaN     | -0.2860 | -0.3129 | -0.2994 |
| 3937 | -0.1881 | NaN     | -0.3471 | -0.2993 |
| 3938 | NaN     | NaN     | NaN     | -0.2985 |
| 3939 | NaN     | NaN     | NaN     | -0.2979 |
| 3940 | -0.1472 | NaN     | -0.9989 | -0.2954 |
| 3941 | NaN     | -0.0848 | -0.6687 | -0.2933 |
| 3942 | -0.2923 | NaN     | NaN     | -0.2933 |
| 3943 | -0.2921 | NaN     | NaN     | -0.2921 |
| 3944 | -0.2913 | NaN     | NaN     | -0.2913 |
| 3945 | NaN     | -0.2470 | -0.3350 | -0.2910 |
| 3946 | -0.2884 | NaN     | NaN     | -0.2884 |
| 3947 | -0.7155 | -0.1428 | NaN     | -0.2864 |
| 3948 | NaN     | -0.4854 | -0.0853 | -0.2853 |
| 3949 | -0.2847 | NaN     | NaN     | -0.2847 |
| 3950 | -0.2847 | NaN     | NaN     | -0.2847 |
| 3951 | NaN     | NaN     | -0.5072 | -0.2827 |
| 3952 | NaN     | -0.1395 | -0.4744 | -0.2815 |
| 3953 | NaN     | -0.2814 | NaN     | -0.2814 |
| 3954 | -0.1862 | NaN     | NaN     | -0.2813 |
| 3955 | NaN     | NaN     | -0.2803 | -0.2803 |
| 3956 | -0.2713 | NaN     | NaN     | -0.2719 |
| 3957 | NaN     | -0.5080 | -0.1350 | -0.2710 |
| 3958 | -0.8005 | NaN     | -0.1098 | -0.2709 |
| 3959 | NaN     | -0.6785 | -0.5211 | -0.2695 |
| 3960 | NaN     | NaN     | -0.2673 | -0.2673 |
| 3961 | NaN     | NaN     | -0.5705 | -0.2671 |
| 3962 | NaN     | -0.2051 | -0.3359 | -0.2656 |
| 3963 | NaN     | -0.9132 | -0.3872 | -0.2630 |
| 3964 | NaN     | -0.2975 | -0.7823 | -0.2624 |
| 3965 | -0.2618 | NaN     | NaN     | -0.2618 |
| 3966 | NaN     | -0.4846 | -1.0081 | -0.2616 |
| 3967 | -0.2611 | NaN     | NaN     | -0.2611 |
| 3968 | NaN     | -0.1365 | -0.3851 | -0.2609 |
| 3969 | -0.4894 | NaN     | NaN     | -0.2599 |
| 3970 | -0.5680 | NaN     | -1.2865 | -0.2587 |
| 3971 | -0.1315 | -0.9608 | NaN     | -0.2582 |
| 3972 | -0.0935 | NaN     | NaN     | -0.2577 |
| 3973 | -0.1517 | NaN     | -0.3636 | -0.2576 |
| 3974 | -0.2570 | NaN     | NaN     | -0.2570 |
| 3975 | -0.0870 | NaN     | NaN     | -0.2558 |
| 3976 | NaN     | NaN     | -0.5341 | -0.2557 |
| 3977 | -0.2558 | NaN     | NaN     | -0.2556 |
| 3978 | NaN     | NaN     | NaN     | -0.2555 |
| 3979 | NaN     | -0.1958 | -0.3142 | -0.2550 |
| 3980 | NaN     | -0.5925 | -0.0869 | -0.2542 |
| 3981 | NaN     | -0.2781 | -1.2594 | -0.2517 |
| 3982 | NaN     | NaN     | -0.4930 | -0.2510 |
| 3983 | NaN     | -1.0529 | -0.5513 | -0.2505 |
| 3984 | -0.5395 | -0.2628 | NaN     | -0.2498 |
| 3985 | -0.2565 | NaN     | NaN     | -0.2495 |
| 3986 | -0.2490 | NaN     | NaN     | -0.2490 |
| 3987 | -0.2480 | NaN     | NaN     | -0.2480 |
| 3988 | -0.4581 | -0.1018 | NaN     | -0.2467 |
| 3989 | -0.2457 | NaN     | NaN     | -0.2457 |
| 3990 | NaN     | -0.1399 | -0.6505 | -0.2454 |
| 3991 | -0.2428 | NaN     | NaN     | -0.2429 |
| 3992 | NaN     | NaN     | -0.4994 | -0.2424 |
| 3993 | -0.0728 | NaN     | NaN     | -0.2414 |
| 3994 | -0.2405 | NaN     | NaN     | -0.2405 |
| 3995 | -1.3483 | NaN     | NaN     | -0.2402 |
| 3996 | NaN     | -0.5925 | -0.4997 | -0.2399 |
| 3997 | -0.6920 | -0.2125 | NaN     | -0.2399 |
| 3998 | NaN     | NaN     | NaN     | -0.2393 |
| 3999 | -0.3903 | -0.0889 | NaN     | -0.2392 |
| 4000 | NaN     | -0.2979 | -0.1662 | -0.2392 |
| 4001 | -0.2368 | NaN     | NaN     | -0.2389 |
| 4002 | NaN     | -0.9795 | -0.1444 | -0.2395 |
| 4003 | -0.2382 | NaN     | NaN     | -0.2382 |
| 4004 | NaN     | -0.1117 | -0.5676 | -0.2274 |
| 4005 | -0.2265 | NaN     | NaN     | -0.2265 |
| 4006 | -1.7154 | NaN     | -0.4387 | -0.2231 |
| 4007 | -0.2215 | NaN     | NaN     | -0.2215 |
| 4008 | -0.2310 | NaN     | NaN     | -0.2194 |
| 4009 | -0.2192 | NaN     | NaN     | -0.2192 |
| 4010 | -0.6801 | -0.2483 | NaN     | -0.2185 |
| 4011 | -0.1545 | NaN     | NaN     | -0.2145 |
| 4012 | -0.6880 | NaN     | -0.3179 | -0.2144 |
| 4013 | NaN     | NaN     | -0.4136 | -0.2136 |
| 4014 | -0.4444 | NaN     | NaN     | -0.2127 |
| 4015 | NaN     | -0.1046 | -0.5289 | -0.2122 |
| 4016 | -0.2112 | NaN     | NaN     | -0.2112 |
| 4017 | -0.2097 | NaN     | NaN     | -0.2097 |
| 4018 | -0.2089 | NaN     | NaN     | -0.2089 |
| 4019 | NaN     | -0.7189 | -0.0078 | -0.2088 |
| 4020 | NaN     | -0.3040 | -0.1073 | -0.2061 |
| 4021 | -0.6579 | NaN     | NaN     | -0.2055 |

|   |            |                                                                                                                 |
|---|------------|-----------------------------------------------------------------------------------------------------------------|
| 0 | Q8R0F5     | RNA-binding motif protein, X-linked 2                                                                           |
| 0 | Q09138     | Tetratricopeptide repeat protein 30A1;Tetratricopeptide repeat protein 30B;Tetratricopeptide repeat protein 30C |
| 0 | Q8CH5      | 1-phosphatidylinositol 4,5-bisphosphate phosphodiesterase gamma-2                                               |
| 0 | P62821     | Ras-related protein Rab-1A                                                                                      |
| 0 | P09450     | Transcription factor Jun-B                                                                                      |
| 0 | Q8I202     | AFG3-like protein 2                                                                                             |
| 0 | A2A671     | Cerebellar degeneration-related protein 2-like                                                                  |
| 0 | O54786     | DNA fragmentation factor subunit alpha                                                                          |
| 0 | Q91W39     | Nuclear receptor coactivator 5                                                                                  |
| 0 | Q09U18     | Dehydrodicholyl diphosphate synthase complex subunit Nus1                                                       |
| 0 | Q9WTS2     | Alpha-(1,6)-fucosyltransferase                                                                                  |
| 0 | Q61466     | SWI/SNF-related matrix-associated actin-dependent regulator of chromatin subfamily D member 1                   |
| 0 | Q3U5F4     | YrdC domain-containing protein, mitochondrial                                                                   |
| 0 | Q35900     | U6 snRNA-associated Sm-like protein Lsm2                                                                        |
| 0 | Q9D0G0     | 28S ribosomal protein S30, mitochondrial                                                                        |
| 0 | Q9ZL13     | Transmembrane and coiled-coil domain-containing protein 1                                                       |
| 0 | P9V007     |                                                                                                                 |
| 0 | Q61464     | Zinc finger protein 638                                                                                         |
| 0 | Q91VX9     | Transmembrane protein 168                                                                                       |
| 0 | Q8VE42     | Ankyrin repeat domain-containing protein 49                                                                     |
| 0 | Q9D896     | Neurogulin                                                                                                      |
| 0 | Q88V3      | Ran-binding protein 6                                                                                           |
| 0 | Q9D8B6     | Protein FAM210B                                                                                                 |
| 0 | Q8R0X0     | 28S ribosomal protein S10, mitochondrial                                                                        |
| 0 | Q9Z1X9     | Protein disulfide-isomerase A5                                                                                  |
| 0 | Q9C7L5     | Golgi-associated plant pathogenesis-related protein 1                                                           |
| 0 | Q9C678     | Apoptosis-stimulating of p53 protein 2                                                                          |
| 0 | Q9C0X0     | 2-methoxy-6-poly(phenyl)-1,4-benzoquinone methylase, mitochondrial                                              |
| 0 | P59110     | Sentrin-specific protease 1                                                                                     |
| 0 | F6VFS9     | Guanylate cyclase                                                                                               |
| 0 | Q8K1N4     | Spermatogenesis-associated serine-rich protein 2                                                                |
| 0 | Q70546     | Lysine-specific demethylase 6A                                                                                  |
| 0 | Q9CQE6     | Histone chaperone ASF1A                                                                                         |
| 0 | Q8R307     | Vacuolar protein sorting-associated protein 18 homolog                                                          |
| 0 | Q9D8X2     | Coiled-coil domain-containing protein 124                                                                       |
| 0 | Q8R8T8     | HAUS augmin-like complex subunit 7                                                                              |
| 0 | Q55500     | DBF4-type zinc finger-containing protein 2 homolog                                                              |
| 0 | Q8C3X8     | Lipase maturation factor 2                                                                                      |
| 0 | Q6PCN7     | Helicase-like transcription factor                                                                              |
| 0 | Q91X78     | Erlin-1                                                                                                         |
| 0 | Q9CR20     | Immediate early response 3-interacting protein 1                                                                |
| 0 | Q6NZF1     | Zinc finger CCH domain-containing protein 11A                                                                   |
| 0 | Q60772     | Cyclin-dependent kinase 4 inhibitor C                                                                           |
| 0 | Q9D8W3     | Protein NATD1                                                                                                   |
| 0 | A2A6H6     | Mediator of RNA polymerase II transcription subunit 12                                                          |
| 0 | Q9C0P2     | RNA1-activating mini protein                                                                                    |
| 0 | Q8R0X2     | DNA-directed RNA polymerase I subunit RPA49                                                                     |
| 0 | Q910J8     | Zinc finger FYVE domain-containing protein 1                                                                    |
| 0 | Q60929     | Myocyte-specific enhancer factor 2A                                                                             |
| 0 | Q6ZWM4     | U6 snRNA-associated Sm-like protein Lsm8                                                                        |
| 0 | Q88HN5     | RNA-binding protein 45                                                                                          |
| 0 | Q88H58     | Syntaxin                                                                                                        |
| 0 | Q9WVG6     | Histone-arginine methyltransferase CARM1                                                                        |
| 0 | P27790     | Major centromere autoantigen 8                                                                                  |
| 0 | Q91V83     | TELO2-interacting protein 1 homolog                                                                             |
| 0 | Q8RWS3     | RNA/RNA 2'-O-methyltransferase fibrillarin-like protein 1                                                       |
| 0 | Q640L5     | Coiled-coil domain-containing protein 18                                                                        |
| 0 | Q08908     | Phosphatidylinositol 3-kinase regulatory subunit beta                                                           |
| 0 | Q9EQR6     | Fanconi anemia group G protein homolog                                                                          |
| 0 | Q8VEM1     | E3 ubiquitin-protein ligase RNF130                                                                              |
| 0 | Q3TLR7     | Denticleless protein homolog                                                                                    |
| 0 | Q91V24     | ATP-binding cassette sub-family A member 7                                                                      |
| 0 | Q8VCB2     | Mediator of RNA polymerase II transcription subunit 25                                                          |
| 0 | Q8RVL3     | Sorting nexin-17                                                                                                |
| 0 | P50295     | Arylamine N-acetyltransferase 2;Arylamine N-acetyltransferase 3;Arylamine N-acetyltransferase 4                 |
| 0 | A2A2A5     | RNA pseudouridine synthase-like 1                                                                               |
| 0 | Q55234     | Proteasome subunit beta type-5                                                                                  |
| 0 | Q9D381     | Very-long-chain (3R)-3-hydroxyacyl-CoA dehydratase 2                                                            |
| 0 | Q3U1V6     | Ubiquitin-conjugating enzyme E2 variant 3                                                                       |
| 0 | Q55XC3     |                                                                                                                 |
| 0 | Q9CZT5     | Vasorin                                                                                                         |
| 0 | Q88665     | Bromodomain-containing protein 7                                                                                |
| 0 | B1APX2     | Uncharacterized protein KIAA0930 homolog                                                                        |
| 0 | Q35730     | E3 ubiquitin-protein ligase RING1                                                                               |
| 0 | Q9D9K3     | Cell death regulator Aven                                                                                       |
| 0 | Q8R8Q3     | Protein FAM73B                                                                                                  |
| 0 | Q5V0C5     | Transcription termination factor 2                                                                              |
| 0 | Q9EP72     | ER membrane protein complex subunit 7                                                                           |
| 0 | P58069     | Ras GTPase-activating protein 2                                                                                 |
| 0 | Q8R8G8     | Transmembrane protein 209                                                                                       |
| 0 | Q9J1L8     | Serine-tRNA ligase, mitochondrial                                                                               |
| 0 | Q80T95     | Vacuolar protein sorting-associated protein 13B                                                                 |
| 0 | Q08664     | B-cell CLL/lymphoma 7 protein family member C                                                                   |
| 0 | Q9CWG9     | Biogenesis of lysosome-related organelles complex 1 subunit 2                                                   |
| 0 | P97355     | Spermine synthase                                                                                               |
| 0 | Q9C4D0     | 39S ribosomal protein L49, mitochondrial                                                                        |
| 0 | Q8C877     | Transcription elongation factor B polypeptide 3                                                                 |
| 0 | Q8RWR4     | Ubiquitin carboxyl-terminal hydrolase 40                                                                        |
| 0 | Q80V98     | Phospholipase DDHD2                                                                                             |
| 0 | P54818     | Galactocerebrosidase                                                                                            |
| 0 | A2AFQ9     | Gemin5                                                                                                          |
| 0 | P03975     | IgE-binding protein                                                                                             |
| 0 | A0A0G2JE89 | Phospholipid-transporting ATPase                                                                                |
| 0 | Q8RHX1     | HAUS augmin-like complex subunit 1                                                                              |
| 0 | P49282     | Natural resistance-associated macrophage protein 2                                                              |
| 0 | P59481     | VRP3-like protein                                                                                               |
| 0 | Q8K0G5     | Rho GTPase-activating protein 18                                                                                |
| 0 | Q80U54     | Actin-related protein 5                                                                                         |
| 0 | Q8CE50     | Sorting nexin-30                                                                                                |
| 0 | Q6ZQ14     | WD repeat-containing protein 43                                                                                 |
| 0 | Q64331     | Unconventional myosin-VI                                                                                        |
| 0 | Q9D0B1     | UDP-N-acetylglucosamine transferase subunit ALG14 homolog                                                       |
| 0 | P21619     | Lamin-B2                                                                                                        |
| 0 | Q8R0R3     | LYR motif-containing protein 2                                                                                  |
| 0 | Q6P4V2     | Probable E3 ubiquitin-protein ligase HERC4                                                                      |
| 0 | P01103     | UBX domain-containing protein 6                                                                                 |
| 0 | Q9P9L6     | CMP-N-acetylneuraminate-beta-galactosamide-alpha-2,3-sialyltransferase 1                                        |
| 0 | Q90Y33     | Tetraspanin-3                                                                                                   |
| 0 | Q9WUJ9     | Germline-center associated nuclear protein                                                                      |
| 0 | Q64511     | DNA topoisomerase 2-beta                                                                                        |
| 0 | Q9N1P6     | Homer protein homolog 3                                                                                         |
| 0 | Q6PR54     | Telomere-associated protein RIF1                                                                                |
| 0 | Q8RFX1     | E3 ubiquitin-protein ligase RNF187                                                                              |
| 0 | Q64735     | Complement component receptor 1-like protein                                                                    |
| 0 | Q8RWE4     | Kinesin-like protein KIF20B                                                                                     |
| 0 | Q54791     | Transcription factor MafK                                                                                       |
| 0 | P49282     | Natural resistance-associated macrophage protein 2                                                              |
| 0 | E99211     |                                                                                                                 |
| 0 | Q8K4X7     | 1-acyl-sn-glycerol-3-phosphate acyltransferase delta                                                            |
| 0 | Q922P9     | Putative oxidoreductase GYL1                                                                                    |
| 0 | Q61730     | Interleukin-1 receptor accessory protein                                                                        |
| 0 | E9Q467     |                                                                                                                 |
| 0 | Q9J199     | Sphingosine-1-phosphate phosphatase 1                                                                           |
| 0 | Q08274     | Dystrophin myotonic WD repeat-containing protein                                                                |
| 0 | P40630     | Transcription factor A, mitochondrial                                                                           |

|          |   |   |   |
|----------|---|---|---|
| 0003     |   |   |   |
| 78802    |   |   |   |
| 234779   |   |   |   |
| 19324    |   |   |   |
| 16477    |   |   |   |
| 59597    |   |   |   |
| 337988   |   |   |   |
| 13347    |   |   |   |
| 228869   |   |   |   |
| 52014    |   |   |   |
| 33618    |   |   |   |
| 83797    |   |   |   |
| 230734   |   |   |   |
| 27756    |   |   |   |
| 59054    |   |   |   |
| 88944    |   |   |   |
| 522307   |   |   |   |
| 18139    |   |   |   |
| 1011118  |   |   |   |
| 66503    |   |   |   |
| 68966    |   |   |   |
| 40614    |   |   |   |
| 67017    |   |   |   |
| 2599     |   |   |   |
| 884009   |   |   |   |
| 209456   |   |   | 1 |
| 52064    |   |   |   |
| 223870   |   |   |   |
| 2572     |   |   |   |
| 22289    |   |   |   |
| 66403    |   |   |   |
| 28545    |   |   |   |
| 234388   |   |   |   |
| 73738    |   |   |   |
| 73884    |   |   |   |
| 105847   |   |   |   |
| 20585    |   |   |   |
| 226144   |   | 1 |   |
| 66191    |   |   |   |
| 70579    |   |   |   |
| 12580    |   |   |   |
| 40803    |   |   |   |
| 9024     |   |   |   |
| 67148    |   |   |   |
| 4424     |   |   |   |
| 217695   |   |   |   |
| 17258    |   |   |   |
| 76522    |   |   |   |
| 241490   |   |   |   |
| 119613   |   |   |   |
| 59035    |   |   |   |
| 12616    |   |   |   |
| 75425    |   |   |   |
| 37730    |   |   |   |
| 3254     |   |   |   |
| 18709    |   |   | 1 |
| 50534    |   |   |   |
| 59044    |   | 1 |   |
| 76843    |   |   |   |
| 27403    |   | 1 |   |
| 5613     |   |   |   |
| 666781   |   |   |   |
| 17961    |   |   |   |
| 33813    |   |   |   |
| 19173    | 1 |   |   |
| 70757    |   |   |   |
| 4122     |   |   |   |
| 146154   |   |   |   |
| 66992    |   |   |   |
| 223739   |   |   |   |
| 49763    |   | 1 |   |
| 4268     |   |   | 1 |
| 108958   |   |   |   |
| 74044    |   |   |   |
| 73024    |   |   |   |
| 114713   |   |   |   |
| 72649    |   |   |   |
| 71984    |   |   |   |
| 666173   |   |   |   |
| 12055    |   |   |   |
| 73689    |   |   |   |
| 20603    |   |   |   |
| 18120    |   |   |   |
| 27224    |   |   |   |
| 2227334  |   |   |   |
| 72108    |   |   |   |
| 14420    |   |   |   |
| 225745   |   |   |   |
| 18174    | 1 |   |   |
| 214895   |   |   |   |
| 73910    |   |   |   |
| 209131   |   |   |   |
| 72515    |   |   |   |
| 66789    |   |   |   |
| 16907    |   |   |   |
| 108755   |   |   |   |
| 57345    |   |   |   |
| 33887    |   | 1 |   |
| 66530    |   |   |   |
| 20442    |   |   |   |
| 56434    |   |   |   |
| 4387     |   |   |   |
| 21971974 |   |   |   |
| 86558    |   |   |   |
| 51869    |   |   |   |
| 108660   |   |   |   |
| 12946    |   | 1 |   |
| 40641    |   |   |   |
| 71733    |   |   |   |
| 18174    | 1 |   |   |
| 270210   |   |   |   |
| 68262    |   |   |   |
| 74022    |   |   |   |
| 165180   |   |   |   |
| 31535    |   |   |   |
| 13401    |   |   |   |
| 21780    |   |   |   |



|      |         |         |         |         |
|------|---------|---------|---------|---------|
| 4022 | 1.1603  | 0.6857  | NaN     | -0.2039 |
| 4023 | NaN     | NaN     | NaN     | -0.2037 |
| 4024 | NaN     | NaN     | NaN     | -0.2035 |
| 4025 | -1.0224 | 0.3171  | NaN     | -0.2025 |
| 4026 | NaN     | -0.4931 | 0.0938  | -0.1999 |
| 4027 | NaN     | -1.7346 | 0.4910  | -0.1984 |
| 4028 | NaN     | -0.1991 | NaN     | -0.1977 |
| 4029 | -1.3644 | NaN     | NaN     | -0.1966 |
| 4030 | NaN     | 0.1967  | 0.0754  | -0.1957 |
| 4031 | NaN     | 0.1160  | -0.6304 | -0.1950 |
| 4032 | -0.2092 | -0.1801 | NaN     | -0.1947 |
| 4033 | -0.1940 | NaN     | NaN     | -0.1940 |
| 4034 | NaN     | 0.6495  | 0.2648  | -0.1925 |
| 4035 | 0.4399  | NaN     | 0.8248  | -0.1925 |
| 4036 | NaN     | -0.3755 | NaN     | -0.1901 |
| 4037 | -1.6505 | -0.4159 | NaN     | -0.1897 |
| 4038 | NaN     | -0.2847 | -0.0926 | -0.1882 |
| 4039 | -0.3334 | NaN     | NaN     | -0.1870 |
| 4040 | -0.1868 | NaN     | NaN     | -0.1868 |
| 4041 | NaN     | -0.1858 | NaN     | -0.1858 |
| 4042 | -0.3006 | NaN     | NaN     | -0.1852 |
| 4043 | 0.7411  | 0.6858  | NaN     | -0.1841 |
| 4044 | NaN     | NaN     | 0.1836  | -0.1836 |
| 4045 | NaN     | -0.5116 | 0.1405  | -0.1825 |
| 4046 | NaN     | -1.7025 | -1.4369 | -0.1811 |
| 4047 | NaN     | -0.3285 | -0.6977 | -0.1791 |
| 4048 | NaN     | NaN     | NaN     | -0.1789 |
| 4049 | NaN     | -0.6300 | 0.3784  | -0.1780 |
| 4050 | NaN     | 0.1097  | -0.4553 | -0.1748 |
| 4051 | -0.1745 | NaN     | NaN     | -0.1746 |
| 4052 | NaN     | 0.9017  | -1.2486 | -0.1725 |
| 4053 | -0.3591 | NaN     | NaN     | -0.1724 |
| 4054 | NaN     | NaN     | 0.1690  | -0.1690 |
| 4055 | NaN     | NaN     | -0.2996 | -0.1689 |
| 4056 | -0.3026 | NaN     | 0.4904  | -0.1689 |
| 4057 | -0.7268 | NaN     | NaN     | -0.1679 |
| 4058 | NaN     | -0.2917 | -0.6236 | -0.1671 |
| 4059 | -0.1654 | NaN     | NaN     | -0.1651 |
| 4060 | -0.1645 | NaN     | NaN     | -0.1645 |
| 4061 | NaN     | -1.6110 | -0.3993 | -0.1627 |
| 4062 | NaN     | -0.4251 | -0.2777 | -0.1618 |
| 4063 | -0.1618 | NaN     | NaN     | -0.1616 |
| 4064 | NaN     | NaN     | 0.1605  | -0.1605 |
| 4065 | NaN     | NaN     | 0.3022  | -0.1596 |
| 4066 | NaN     | -0.0797 | -0.0848 | -0.1589 |
| 4067 | -0.1588 | NaN     | NaN     | -0.1589 |
| 4068 | NaN     | -0.2917 | -0.4444 | -0.1579 |
| 4069 | -0.1566 | NaN     | NaN     | -0.1566 |
| 4070 | -0.6688 | NaN     | NaN     | -0.1555 |
| 4071 | -0.5593 | NaN     | 0.2457  | -0.1548 |
| 4072 | -0.1529 | NaN     | NaN     | -0.1529 |
| 4073 | -0.1507 | NaN     | NaN     | -0.1507 |
| 4074 | -0.1498 | NaN     | NaN     | -0.1498 |
| 4075 | -0.1492 | NaN     | NaN     | -0.1492 |
| 4076 | -0.0407 | NaN     | NaN     | -0.1487 |
| 4077 | -0.2817 | NaN     | NaN     | -0.1482 |
| 4078 | NaN     | -1.2348 | -0.5781 | -0.1474 |
| 4079 | -0.1443 | NaN     | NaN     | -0.1443 |
| 4080 | NaN     | -0.2620 | NaN     | -0.1441 |
| 4081 | -0.1437 | NaN     | NaN     | -0.1437 |
| 4082 | -0.1436 | NaN     | NaN     | -0.1436 |
| 4083 | NaN     | -0.1082 | 0.1754  | -0.1418 |
| 4084 | -0.1398 | NaN     | NaN     | -0.1398 |
| 4085 | -0.1374 | NaN     | NaN     | -0.1374 |
| 4086 | -0.2019 | -0.4788 | NaN     | -0.1371 |
| 4087 | -0.1361 | NaN     | NaN     | -0.1361 |
| 4088 | NaN     | -0.1456 | -0.4159 | -0.1347 |
| 4089 | -0.1343 | NaN     | NaN     | -0.1343 |
| 4090 | NaN     | NaN     | 0.1341  | -0.1341 |
| 4091 | -0.2969 | NaN     | NaN     | -0.1315 |
| 4092 | NaN     | -0.2839 | NaN     | -0.1313 |
| 4093 | NaN     | -0.2187 | -0.5202 | -0.1312 |
| 4094 | NaN     | 0.0970  | 0.3551  | -0.1290 |
| 4095 | NaN     | 0.7538  | 0.4085  | -0.1276 |
| 4096 | NaN     | -0.7767 | -0.1750 | -0.1246 |
| 4097 | NaN     | -0.1444 | NaN     | -0.1244 |
| 4098 | -0.1243 | NaN     | NaN     | -0.1243 |
| 4099 | -0.1240 | NaN     | NaN     | -0.1242 |
| 4100 | NaN     | -0.1206 | NaN     | -0.1209 |
| 4101 | -0.2495 | NaN     | NaN     | -0.1180 |
| 4102 | -0.3288 | NaN     | -0.1594 | -0.1170 |
| 4103 | NaN     | NaN     | 0.2000  | -0.1133 |
| 4104 | -0.1111 | NaN     | NaN     | -0.1111 |
| 4105 | -0.1111 | NaN     | NaN     | -0.1111 |
| 4106 | NaN     | -0.5959 | -0.8159 | -0.1110 |
| 4107 | NaN     | -0.6834 | -0.1059 | -0.1107 |
| 4108 | NaN     | -0.5946 | NaN     | -0.1106 |
| 4109 | NaN     | NaN     | -0.1103 | -0.1103 |
| 4110 | -0.1092 | NaN     | NaN     | -0.1092 |
| 4111 | -0.1772 | NaN     | NaN     | -0.1085 |
| 4112 | NaN     | NaN     | -0.1063 | -0.1063 |
| 4113 | -0.1058 | NaN     | NaN     | -0.1058 |
| 4114 | -0.0531 | 0.5631  | NaN     | -0.1040 |
| 4115 | -0.1039 | NaN     | NaN     | -0.1030 |
| 4116 | NaN     | NaN     | NaN     | -0.1028 |
| 4117 | NaN     | 0.1127  | -0.9179 | -0.1017 |
| 4118 | NaN     | NaN     | -0.1949 | -0.1009 |
| 4119 | -0.1148 | NaN     | NaN     | -0.1006 |
| 4120 | -0.3395 | NaN     | NaN     | -0.0990 |
| 4121 | -1.1711 | NaN     | NaN     | -0.0986 |
| 4122 | NaN     | NaN     | -0.0971 | -0.0971 |
| 4123 | 0.3255  | NaN     | NaN     | -0.0964 |
| 4124 | NaN     | 0.3075  | -0.4993 | -0.0959 |
| 4125 | NaN     | NaN     | -0.0951 | -0.0951 |
| 4126 | NaN     | NaN     | -0.0949 | -0.0949 |
| 4127 | NaN     | -0.1919 | -0.3787 | -0.0919 |
| 4128 | -0.0938 | NaN     | NaN     | -0.0931 |
| 4129 | -1.9239 | NaN     | NaN     | -0.0921 |
| 4130 | 0.3799  | -0.8258 | NaN     | -0.0917 |
| 4131 | NaN     | -0.3358 | 0.1540  | -0.0909 |
| 4132 | NaN     | NaN     | -0.0908 | -0.0908 |
| 4133 | -0.4603 | NaN     | 0.8822  | -0.0894 |
| 4134 | NaN     | NaN     | -0.1834 | -0.0891 |
| 4135 | NaN     | NaN     | -0.1651 | -0.0881 |
| 4136 | NaN     | 0.1025  | -0.2765 | -0.0880 |
| 4137 | -0.4898 | NaN     | -0.9182 | -0.0870 |
| 4138 | -0.0870 | NaN     | NaN     | -0.0870 |
| 4139 | -0.0861 | NaN     | NaN     | -0.0861 |
| 4140 | -0.3012 | NaN     | -0.4685 | -0.0837 |
| 4141 | NaN     | -0.6566 | -0.2571 | -0.0833 |
| 4142 | -0.0833 | NaN     | NaN     | -0.0833 |
| 4143 | -0.3642 | NaN     | NaN     | -0.0827 |
| 4144 | NaN     | 0.2335  | -0.3970 | -0.0822 |
| 4145 | NaN     | 2.5427  | -0.2685 | -0.0811 |
| 4146 | NaN     | NaN     | NaN     | -0.0804 |
| 4147 | NaN     | 0.2174  | -1.9134 | -0.0786 |

|   |            |                                                                                                   |
|---|------------|---------------------------------------------------------------------------------------------------|
| 0 | 088291     | DBIRD complex subunit ZNF326                                                                      |
| 0 | Q37YI8     |                                                                                                   |
| 0 | A2CG63     | AT-rich interactive domain-containing protein 48                                                  |
| 0 | Q8RI07     | PRELI domain-containing protein 1, mitochondrial                                                  |
| 0 | Q8Q029     | WD and tetratricopeptide repeats protein 1                                                        |
| 0 | Q9GZM4     | Tumor necrosis factor receptor superfamily member 10B                                             |
| 0 | Q8B396     | GpE protein homolog 2, mitochondrial                                                              |
| 0 | Q6ZPR5     | Sphingomyelin phosphodiesterase 4                                                                 |
| 0 | Q9D670     | Nitric oxide synthase-interacting protein                                                         |
| 0 | P35411     | Thrombospondin-1                                                                                  |
| 0 | 80V2N1     | Receptor-type tyrosine-protein phosphatase 5                                                      |
| 0 | Q8BVE8     | Histone-lysine N-methyltransferase NSD2                                                           |
| 0 | P15702     | Leukosialin                                                                                       |
| 0 | P49722     | Proteasome subunit alpha type-2                                                                   |
| 0 | Q9D020     | Cytosolic 5-nucleotidase 3A                                                                       |
| 0 | Q29I05     | Muscleblind-like protein 1                                                                        |
| 0 | Q68FG2     |                                                                                                   |
| 0 | Q35954     | Membrane-associated phosphatidylinositol transfer protein 1                                       |
| 0 | Q8B809     | Retinoblastoma-binding protein 5                                                                  |
| 0 | Q9WUJ7     | Cathepsin Z                                                                                       |
| 0 | Q99ML1     | Bcl-2-binding component 3                                                                         |
| 0 | Q9JX30     | Origin recognition complex subunit 3                                                              |
| 0 | Q80TCS     | Pogo transposable element with KRAB domain                                                        |
| 0 | Q8BUN5     | Mothers against decapentaplegic homolog 3                                                         |
| 0 | Q9QUG2     | Rab proteins geranylgeranyltransferase component A 1                                              |
| 0 | Q9EPT5     | Solute carrier organic anion transporter family member 2A1                                        |
| 0 | Q9W0G5     | Synaptotagmin-2                                                                                   |
| 0 | P51791     | Chloride channel protein(HCl-) exchange transporter 3                                             |
| 0 | Q912P6     | NEDD4 family-interacting protein 2                                                                |
| 0 | E9Q4Z2     | Acetyl-CoA carboxylase 2:Biotin carboxylase                                                       |
| 0 | P36552     | Oxygen-dependent coproporphyrinogen-III oxidase, mitochondrial                                    |
| 0 | Q9C296     | Zinc finger CCHC-type and RNA-binding motif-containing protein 1                                  |
| 0 | Q8B855     | Golgi pH regulator                                                                                |
| 0 | Q80UY1     | UPF0586 protein C9orf41 homolog                                                                   |
| 0 | Q9CWX9     | Probable ATP-dependent RNA helicase DDX47                                                         |
| 0 | P43135     | CDUP transcription factor 2                                                                       |
| 0 | Q8B8W5     | Neuronal calcium sensor 1                                                                         |
| 0 | Q8R205     | Zinc finger CCHC domain-containing protein 10                                                     |
| 0 | Q9CQL5     | 39S ribosomal protein L18, mitochondrial                                                          |
| 0 | Q9WVA2     | Mitochondrial import inner membrane translocase subunit Tim8 A/Putative mitochondrial import      |
| 0 | Q8C7E7     | Starch-binding domain-containing protein 1                                                        |
| 0 | Q55WV4     | Mediator of RNA polymerase II transcription subunit 13                                            |
| 0 | Q9WU80     | RanBP-type and C3HC4-type zinc finger-containing protein 1                                        |
| 0 | Q8C147     | Dedicator of cytokinesis protein 8                                                                |
| 0 | Q9WUL7     | ADP-ribosylation factor-like protein 3                                                            |
| 0 | Q70700     | DNA-directed RNA polymerase I subunit RPA2                                                        |
| 0 | Q9D8Y0     | EF-hand domain-containing protein D2                                                              |
| 0 | Q8CGG6     | RNA-binding protein 28                                                                            |
| 0 | Q8H178     | Sec1 family domain-containing protein 2                                                           |
| 0 | Q08586     | Phosphatidylinositol 3,4,5-trisphosphate 3-phosphatase and dual-specificity protein phosphatase 1 |
| 0 | A2ADAE     | 39S ribosomal protein L51, mitochondrial                                                          |
| 0 | Q9CPY1     | YEATS domain-containing protein 2                                                                 |
| 0 | Q3TUF7     | Vacuolar protein sorting-associated protein 41 homolog                                            |
| 0 | Q5K1J9     | NEDD8                                                                                             |
| 0 | P25955     | TERF1-interacting nuclear factor 2                                                                |
| 0 | Q9XG59     | Ribosome biogenesis protein WDRI2                                                                 |
| 0 | Q9JIA4     | Zinc finger protein 740                                                                           |
| 0 | Q6N2Q6     |                                                                                                   |
| 0 | F7FCAS     |                                                                                                   |
| 0 | A2AHCS     | Calmodulin-regulated spectrin-associated protein 1                                                |
| 0 | Q32P12     | Uncharacterized protein C1orf53 homolog                                                           |
| 0 | Q6A037     | NEDD4-binding protein 1                                                                           |
| 0 | Q9JIA7     | Sphingosine kinase 2                                                                              |
| 0 | D3Z2R5     |                                                                                                   |
| 0 | Q9JUL5     | Elongation of very long chain fatty acids protein 1                                               |
| 0 | Q9J2M2     | SH2B adapter protein 1                                                                            |
| 0 | Q8C4P0     |                                                                                                   |
| 0 | Q3UEB3     | Poly(U)-binding-splicing factor PUF60                                                             |
| 0 | Q9CZ99     | ER membrane protein complex subunit 4                                                             |
| 0 | Q8R2U2     |                                                                                                   |
| 0 | Q91V81     | RNA-binding protein 42                                                                            |
| 0 | P54923     | [Protein ADP-ribosylarginine] hydrolase                                                           |
| 0 | Q02013     | Aquaporin-1                                                                                       |
| 0 | Q8B8H4     | Histone-lysine N-methyltransferase;Histone-lysine N-methyltransferase 2C                          |
| 0 | Q9DZK0     | Acetoacetyl-CoA synthetase                                                                        |
| 0 | Q8A4V7     | Hermansky-Pudlak syndrome 6 protein homolog                                                       |
| 0 | Q99KW3     | TRO and F-actin-binding protein                                                                   |
| 0 | Q91V44     | DENN domain-containing protein 2D                                                                 |
| 0 | Q8B8E9     | Intraflagellar transport protein 74 homolog                                                       |
| 0 | Q9D0D2     | Protein Hikeshi                                                                                   |
| 0 | P08249     | Malate dehydrogenase, mitochondrial                                                               |
| 0 | Q9WTO8     | Mitochondrial import inner membrane translocase subunit Tim23                                     |
| 0 | Q3UHX0     | Nucleolar protein 8                                                                               |
| 0 | Q81051     | Calcium uniporter regulatory subunit MCUb, mitochondrial                                          |
| 0 | A0A087WPH7 |                                                                                                   |
| 0 | Q9CWT9     | Kinesin-like protein KIFC1                                                                        |
| 0 | Q6P693     | Poly(UDP-N-acetylgalactosaminyltransferase 2;Poly(UDP-N-acetylgalactosaminyltransferase 2         |
| 0 | Q8C522     | Endonuclease domain-containing 1 protein                                                          |
| 0 | Q35207     | Cyclin-dependent kinase 2-associated protein 1                                                    |
| 0 | Q80TN7     | Neuron navigator 3;Neuron navigator 1                                                             |
| 0 | Q8CSW3     | Tubulin-specific chaperone cofactor E-like protein                                                |
| 0 | Q9R078     | 5-AMP-activated protein kinase subunit beta-1                                                     |
| 0 | Q9D1R2     | Protein KT112 homolog                                                                             |
| 0 | Q35250     | Exocyst complex component 7                                                                       |
| 0 | P29452     | Caspase-1;Caspase-1 subunit p20;Caspase-1 subunit p10                                             |
| 0 | P47226     | Testin                                                                                            |
| 0 | A0A140LQ20 |                                                                                                   |
| 0 | Q8K1C9     | Leucine-rich repeat-containing protein 41                                                         |
| 0 | Q3T2M9     | GDP-Man:Man(3)GlcNAc(2)-PP-Dol alpha-1,2-mannosyltransferase                                      |
| 0 | Q3U6U5     | Putative GTP-binding protein 6                                                                    |
| 0 | A0A0G2JEY4 | Uncharacterized protein C7orf50 homolog                                                           |
| 0 | Q9J9I8     | Protein kinase C and casein kinase II substrate protein 3                                         |
| 0 | Q8BFY6     | Peflin                                                                                            |
| 0 | Q9D114     | Guanosine-3,5-bis(diphosphate) 3-pyrophosphohydrolase MESH1                                       |
| 0 | Q5EBP3     | Armadillo repeat-containing protein 5                                                             |
| 0 | Q9R1P3     | Proteasome subunit beta type-2                                                                    |
| 0 | Q9CQH4     | Transcription initiation factor TFIID subunit 8                                                   |
| 0 | Q8B708     | Origin recognition complex subunit 4                                                              |
| 0 | Q8U0U4     | E3 ubiquitin-protein ligase Praja-2                                                               |
| 0 | Q91U25     | Inositol monophosphatase 2                                                                        |
| 0 | Q9WVK0     | Type-1 angiotensin II receptor-associated protein                                                 |
| 0 | Q6A0A2     | La-related protein 4B                                                                             |
| 0 | Q912B7     | Mas-related G-protein coupled receptor member E                                                   |
| 0 | Q8QZ53     | Follistatin                                                                                       |
| 0 | P58466     | Carboxy-terminal domain RNA polymerase II polypeptide A small phosphatase 1                       |
| 0 | Q9Q8E9     | pre-rRNA processing protein FTSJ3                                                                 |
| 0 | Q9C0P4     |                                                                                                   |
| 0 | Q00A20     | GA-binding protein subunit beta-1                                                                 |
| 0 | Q01237     | 3-hydroxy-3-methylglutaryl coenzyme A reductase;3-hydroxy-3-methylglutaryl-coenzyme A reduct      |
| 0 | Q9CR25     | Diphthamide biosynthesis protein 2                                                                |
| 0 | Q91WK7     | Ankyrin repeat domain-containing protein 54                                                       |
| 0 | Q7TMM2     | 3-5 exoribonuclease 1                                                                             |
| 0 | Q91VNO     | Low-density lipoprotein receptor-related protein 5                                                |
| 0 | Q9D853     | ADP-ribosylation factor GTPase-activating protein 3                                               |
| 0 | Q8R2R6     | Mitochondrial ribosome-associated GTPase 1                                                        |
| 0 | G64FW2     | All-trans-retinol 13,14-reductase                                                                 |

|                |            |   |   |
|----------------|------------|---|---|
| Znf326         | mmu:54367  |   |   |
| Pwpp2b         | mmu:101631 |   |   |
| Arid4b         | mmu:94246  |   |   |
| Preld1         | mmu:66494  |   |   |
| Wdct1          | mmu:230796 | 1 |   |
| Tnfrsf10b      | mmu:21933  |   | 1 |
| Grpel2         | mmu:17714  |   |   |
| Smpd4          | mmu:77626  |   |   |
| Nosip          | mmu:66394  |   |   |
| Thbs1          |            | 1 |   |
| Ptptr          | mmu:19280  |   |   |
| Whsc1          | mmu:107823 | 1 |   |
| Spn            | mmu:20737  |   |   |
| Psm2           | mmu:19166  |   |   |
| Nt5c3a         | mmu:107569 |   | 1 |
| Mbnl1          | mmu:56758  |   |   |
| Sptbn2         | mmu:20743  |   |   |
| Pitpnm1        | mmu:18739  |   |   |
| Rbbp5          | mmu:213464 |   |   |
| Ctsz           | mmu:64138  |   |   |
| Bbc3           | mmu:170770 |   |   |
| Orc3           | mmu:50793  |   | 1 |
| Pogk           | mmu:71592  |   |   |
| Smad3          | mmu:17127  |   | 1 |
| Chm            |            |   |   |
| Sloc2a1        | mmu:24059  |   |   |
| Synj2          | mmu:20975  | 1 |   |
| Cln3           | mmu:12725  |   |   |
| Ndfip2         |            |   |   |
| Acac           | mmu:100705 |   |   |
| Gpx            | mmu:12892  |   |   |
| Zcbr1          | mmu:67197  |   |   |
| Gpr89a         | mmu:67549  |   |   |
|                | mmu:67383  |   |   |
| Ddx47          | mmu:67755  |   |   |
| Nr2f2,Nr2f1    | mmu:11819  |   |   |
| Ncs1           | mmu:14299  |   |   |
| Zc3h10         | mmu:103284 |   |   |
| Mrip18         | mmu:67681  |   |   |
| Timm8a1        | mmu:30058  |   |   |
| Stbd1          | mmu:52331  |   |   |
| Med13          | mmu:327987 |   |   |
| Rbck1          | mmu:24105  |   |   |
| Dock8          | mmu:76088  |   |   |
| Arl3           | mmu:56350  |   |   |
| Polr1b         | mmu:20017  |   |   |
| Efh2           |            |   |   |
| Rbm28          | mmu:68272  |   |   |
| Sfcd2          | mmu:212986 |   |   |
| Pten           | mmu:19211  | 1 | 1 |
| Acap3          |            |   |   |
| Mrip151        | mmu:66493  |   |   |
| Yeats2         | mmu:208146 |   |   |
| Vps41          | mmu:218035 |   |   |
| Nedd8          | mmu:18002  |   |   |
| Tinf2          |            |   |   |
| Wdr12          | mmu:57750  |   |   |
| Zfp740,Znf     | mmu:68744  |   |   |
| Glud1          |            |   |   |
| Camsap1        | mmu:227634 |   |   |
|                |            |   |   |
| N4bp1          | mmu:80750  |   |   |
| Sphk2          | mmu:56632  |   |   |
| Sepn1          | mmu:74777  | 1 |   |
| Elov1          | mmu:54325  |   |   |
| Sh2b1          | mmu:20399  |   |   |
|                |            |   |   |
| Puf60          | mmu:67959  |   |   |
| Emc4           | mmu:68032  |   |   |
| BC027231       | mmu:212547 |   |   |
| Rbm42          | mmu:68035  |   |   |
| Adprh          | mmu:11544  |   |   |
| Aqp1           | mmu:11826  | 1 |   |
| Kmt2c          |            |   |   |
| Aacs           | mmu:78894  |   |   |
| Hps6           | mmu:20170  |   |   |
| Triobp         | mmu:110253 |   |   |
| Dennd2d        | mmu:72121  |   |   |
| Ifit4          | mmu:67694  |   |   |
| L7r6           | mmu:67669  |   |   |
| Moh2           | mmu:17448  |   |   |
| Timm23         |            |   |   |
| Nol8           | mmu:70930  |   |   |
| Ccdc109b       | mmu:66815  |   |   |
| Psmc3          |            |   |   |
| Kifc1          | mmu:16580  |   |   |
| Gaint2         | mmu:108148 |   |   |
| Endod1         | mmu:71946  |   |   |
| Ctd2ap1        | mmu:13445  |   |   |
| Nav3,Nav2,Nav1 |            |   |   |
| Tscel          | mmu:272589 |   |   |
| Prkab1         | mmu:19079  |   |   |
| Kti12          | mmu:100087 |   |   |
| Exoc7          | mmu:53413  |   |   |
| Casp1          | mmu:12362  |   | 1 |
| Tes            |            |   |   |
|                |            |   |   |
| Lrrc41         | mmu:230654 |   | 1 |
| Alg11          | mmu:207958 |   |   |
| Gtpbp6         | mmu:107999 |   |   |
|                |            |   |   |
| Paccin3        | mmu:80708  |   |   |
| Pef1           | mmu:67898  |   |   |
| Hdcd3          | mmu:68695  |   |   |
| Armrc5         | mmu:233912 |   |   |
| Psmb2          | mmu:26445  |   |   |
| Taf8           | mmu:63856  |   |   |
| Orc4           | mmu:26428  |   |   |
| Pja2           | mmu:224938 |   |   |
| Impa2          | mmu:114663 |   | 1 |
| Agtrsp         | mmu:11610  |   |   |
| Larp4b         | mmu:217980 |   |   |
| Mrgpre         | mmu:244238 |   |   |
| Fln            | mmu:216805 |   |   |
| Ctdsp1         | mmu:227292 |   |   |
| Ftsj3          | mmu:56095  | 1 |   |
| Cenpf          | mmu:108000 |   |   |
| Gabpb1         | mmu:14391  |   |   |
| Hmgcr          | mmu:15357  |   |   |
| Dph2           | mmu:67728  |   |   |
| Ankrd54        | mmu:223690 |   |   |
| Erl1           | mmu:67276  |   |   |
| Lrp5           | mmu:16973  |   |   |
| Arfgap3        | mmu:66251  |   |   |
| Mtg1           | mmu:212508 |   |   |
| Retsat         | mmu:67442  |   |   |

|      |         |         |         |         |
|------|---------|---------|---------|---------|
| 4148 | NaN     | -0.1276 | NaN     | -0.0788 |
| 4149 | -0.8363 | -0.2766 | NaN     | -0.0787 |
| 4150 | -0.0758 | NaN     | NaN     | -0.0758 |
| 4151 | -0.9473 | NaN     | NaN     | -0.0757 |
| 4152 | -1.1268 | NaN     | -0.6923 | -0.0752 |
| 4153 | -0.0746 | NaN     | -0.0740 | -0.0740 |
| 4154 | -0.6448 | NaN     | -0.5789 | -0.0739 |
| 4155 | NaN     | -1.0010 | -0.6676 | -0.0722 |
| 4156 | -0.9221 | -0.3009 | NaN     | -0.0717 |
| 4157 | -0.6012 | -0.7196 | NaN     | -0.0712 |
| 4158 | -0.2339 | NaN     | -0.3763 | -0.0712 |
| 4159 | -0.5481 | -0.4068 | NaN     | -0.0710 |
| 4160 | NaN     | NaN     | -0.5183 | -0.0699 |
| 4161 | NaN     | -0.3757 | -0.4136 | -0.0689 |
| 4162 | NaN     | -0.8024 | -0.6649 | -0.0686 |
| 4163 | -0.0689 | NaN     | NaN     | -0.0684 |
| 4164 | -0.4895 | NaN     | NaN     | -0.0679 |
| 4165 | -0.8564 | NaN     | NaN     | -0.0662 |
| 4166 | -0.0641 | NaN     | NaN     | -0.0641 |
| 4167 | NaN     | -0.1393 | -0.2796 | -0.0617 |
| 4168 | NaN     | -0.2515 | -0.3756 | -0.0620 |
| 4169 | NaN     | -0.5151 | -0.0896 | -0.0614 |
| 4170 | NaN     | NaN     | NaN     | -0.0614 |
| 4171 | -0.0601 | NaN     | NaN     | -0.0607 |
| 4172 | NaN     | -0.2386 | -0.3595 | -0.0604 |
| 4173 | -0.0595 | NaN     | NaN     | -0.0602 |
| 4174 | -0.4514 | NaN     | -0.5667 | -0.0578 |
| 4175 | NaN     | NaN     | -0.0570 | -0.0577 |
| 4176 | -0.0935 | NaN     | NaN     | -0.0567 |
| 4177 | -0.2388 | NaN     | -0.1926 | -0.0542 |
| 4178 | NaN     | -0.0604 | -0.0446 | -0.0527 |
| 4179 | -0.1231 | NaN     | -0.3993 | -0.0508 |
| 4180 | -0.0498 | NaN     | NaN     | -0.0496 |
| 4181 | -0.0478 | NaN     | NaN     | -0.0472 |
| 4182 | -0.3189 | NaN     | NaN     | -0.0450 |
| 4183 | -0.2238 | -0.3359 | -0.0842 | -0.0442 |
| 4184 | -0.0731 | -0.0934 | NaN     | -0.0428 |
| 4185 | -0.0731 | -0.0934 | NaN     | -0.0428 |
| 4186 | -0.0428 | NaN     | NaN     | -0.0425 |
| 4187 | -0.3275 | NaN     | NaN     | -0.0416 |
| 4188 | NaN     | -0.2419 | -0.3238 | -0.0409 |
| 4189 | -0.9518 | -1.0331 | NaN     | -0.0396 |
| 4190 | NaN     | -0.4673 | -0.3809 | -0.0393 |
| 4191 | -0.0393 | NaN     | NaN     | -0.0370 |
| 4192 | NaN     | NaN     | NaN     | -0.0368 |
| 4193 | NaN     | -0.0161 | -0.5851 | -0.0359 |
| 4194 | NaN     | -0.5497 | -0.6176 | -0.0358 |
| 4195 | -0.0358 | NaN     | NaN     | -0.0323 |
| 4196 | -0.0323 | NaN     | NaN     | -0.0323 |
| 4197 | NaN     | -0.3013 | -0.3655 | -0.0323 |
| 4198 | NaN     | -0.1648 | -0.2287 | -0.0320 |
| 4199 | -0.0321 | NaN     | NaN     | -0.0321 |
| 4200 | -0.0321 | NaN     | NaN     | -0.0321 |
| 4201 | NaN     | -0.1370 | -0.0767 | -0.0309 |
| 4202 | -0.0309 | NaN     | NaN     | -0.0298 |
| 4203 | NaN     | NaN     | NaN     | -0.0298 |
| 4204 | NaN     | -0.4189 | -0.4709 | -0.0298 |
| 4205 | NaN     | -0.5272 | -0.1548 | -0.0297 |
| 4206 | -0.2135 | -0.1642 | NaN     | -0.0297 |
| 4207 | -1.0111 | NaN     | NaN     | -0.0297 |
| 4208 | NaN     | NaN     | NaN     | -0.0297 |
| 4209 | -0.0297 | NaN     | NaN     | -0.0224 |
| 4210 | -1.1120 | NaN     | -1.1048 | -0.0224 |
| 4211 | NaN     | NaN     | NaN     | -0.0224 |
| 4212 | -0.0224 | -0.2599 | NaN     | -0.0224 |
| 4213 | NaN     | NaN     | NaN     | -0.0224 |
| 4214 | -0.3177 | -0.0968 | NaN     | -0.0224 |
| 4215 | -0.0657 | -0.0657 | NaN     | -0.0224 |
| 4216 | NaN     | -1.0915 | -1.1250 | -0.0224 |
| 4217 | NaN     | NaN     | NaN     | -0.0224 |
| 4218 | NaN     | -0.1084 | -0.1355 | -0.0224 |
| 4219 | NaN     | NaN     | NaN     | -0.0224 |
| 4220 | NaN     | NaN     | NaN     | -0.0224 |
| 4221 | NaN     | -0.1996 | -0.2224 | -0.0224 |
| 4222 | NaN     | NaN     | NaN     | -0.0224 |
| 4223 | NaN     | -0.4032 | -0.1538 | -0.0224 |
| 4224 | NaN     | -0.4925 | -0.4089 | -0.0224 |
| 4225 | NaN     | -0.5361 | -0.0553 | -0.0224 |
| 4226 | NaN     | -0.0726 | -0.0611 | -0.0224 |
| 4227 | NaN     | -0.4140 | -0.4243 | -0.0224 |
| 4228 | NaN     | NaN     | NaN     | -0.0224 |
| 4229 | -0.2547 | -0.2938 | NaN     | -0.0224 |
| 4230 | -0.1528 | NaN     | NaN     | -0.0224 |
| 4231 | NaN     | -0.1180 | -0.1179 | -0.0224 |
| 4232 | NaN     | -0.5897 | -0.3011 | -0.0224 |
| 4233 | NaN     | NaN     | NaN     | -0.0224 |
| 4234 | NaN     | NaN     | -0.4441 | -0.0224 |
| 4235 | NaN     | NaN     | NaN     | -0.0224 |
| 4236 | NaN     | -0.8785 | -0.6880 | -0.0224 |
| 4237 | -0.8350 | NaN     | -0.8240 | -0.0224 |
| 4238 | NaN     | -0.4750 | -0.2021 | -0.0224 |
| 4239 | -0.1769 | NaN     | -0.1551 | -0.0224 |
| 4240 | -0.2658 | NaN     | -0.2285 | -0.0224 |
| 4241 | NaN     | -0.5909 | -0.5597 | -0.0224 |
| 4242 | NaN     | -0.1754 | NaN     | -0.0224 |
| 4243 | NaN     | -0.3188 | -0.3504 | -0.0224 |
| 4244 | -0.4638 | NaN     | -0.0647 | -0.0224 |
| 4245 | -0.2567 | -0.3904 | NaN     | -0.0224 |
| 4246 | -0.0458 | NaN     | NaN     | -0.0224 |
| 4247 | -0.0458 | NaN     | NaN     | -0.0224 |
| 4248 | -0.2047 | NaN     | NaN     | -0.0224 |
| 4249 | NaN     | -0.0785 | -0.0448 | -0.0224 |
| 4250 | -0.0224 | NaN     | NaN     | -0.0224 |
| 4251 | -0.0224 | NaN     | NaN     | -0.0224 |
| 4252 | -0.0224 | NaN     | NaN     | -0.0224 |
| 4253 | -0.0224 | NaN     | NaN     | -0.0224 |
| 4254 | -0.8109 | NaN     | NaN     | -0.0224 |
| 4255 | NaN     | -0.2417 | -0.4149 | -0.0224 |
| 4256 | NaN     | -0.4916 | -0.4428 | -0.0224 |
| 4257 | -1.0010 | -0.9535 | NaN     | -0.0224 |
| 4258 | NaN     | -0.0641 | -0.1139 | -0.0224 |
| 4259 | NaN     | -0.0339 | NaN     | -0.0224 |
| 4260 | -0.2524 | -0.3088 | NaN     | -0.0224 |
| 4261 | -0.5970 | NaN     | NaN     | -0.0224 |
| 4262 | NaN     | -0.3967 | -0.2944 | -0.0224 |
| 4263 | -0.0937 | NaN     | NaN     | -0.0224 |
| 4264 | -0.3206 | NaN     | -0.3128 | -0.0224 |
| 4265 | -0.0224 | NaN     | NaN     | -0.0224 |
| 4266 | -0.0348 | NaN     | -0.1076 | -0.0224 |
| 4267 | -0.0148 | NaN     | NaN     | -0.0224 |
| 4268 | -0.3453 | NaN     | -0.3047 | -0.0224 |
| 4269 | NaN     | NaN     | -0.0610 | -0.0224 |
| 4270 | NaN     | -0.0378 | NaN     | -0.0224 |
| 4271 | NaN     | -0.0398 | NaN     | -0.0224 |
| 4272 | -0.1041 | -0.1838 | NaN     | -0.0224 |
| 4273 | -0.0224 | NaN     | NaN     | -0.0224 |

|   |            |                                                                                                                             |                                 |
|---|------------|-----------------------------------------------------------------------------------------------------------------------------|---------------------------------|
| 0 | Q901F3     | Uncharacterized protein Ckorf40 homolog                                                                                     |                                 |
| 0 | Q0VGY8     | Protein TANC1                                                                                                               | Tanc1                           |
| 0 | P06797     | Cathepsin L1;Cathepsin L1 heavy chain;Cathepsin L1 light chain                                                              | Ctsl                            |
| 0 | Q3UVL4     | Vacuolar protein sorting-associated protein 51 homolog                                                                      | Vps51                           |
| 0 | P48725     | Pericentrin                                                                                                                 | Pcnt                            |
| 0 | Q921E6     | Polycarbonyl protein EED                                                                                                    | Eed                             |
| 0 | Q90786     | HAUS augmin-like complex subunit 5                                                                                          | Haus5                           |
| 0 | Q3U487     | E3 ubiquitin-protein ligase HECTD3                                                                                          | Hectd3                          |
| 0 | Q61543     | Golgi apparatus protein 1                                                                                                   | Glg1                            |
| 0 | Q9Q2H6     | Evolutionarily conserved signaling intermediate in Toll pathway, mitochondrial                                              | Escit                           |
| 0 | A2AQC1     |                                                                                                                             | Dhx35                           |
| 0 | Q77PE5     | Probable RNA polymerase II nuclear localization protein SLC7A60S                                                            | Slc7a60s                        |
| 0 | Q6P615     | Mycophenolic acid acyl-glucuronide esterase, mitochondrial                                                                  | Abhd10                          |
| 0 | Q88G50     | Protein MAK16 homolog                                                                                                       | Mak16                           |
| 0 | Q8VQC3     | Nuclear receptor-binding factor 2                                                                                           | Nrbf2                           |
| 0 | Q91V74     | Carbonyl reductase family member 4                                                                                          | Cbr4                            |
| 0 | Q6C2K0     | Condensin-2 complex subunit D3                                                                                              | Ncapd3                          |
| 0 | Q8CCM6-2   |                                                                                                                             |                                 |
| 0 | Q9CQL4     | 39S ribosomal protein L20, mitochondrial                                                                                    | Mrlp20                          |
| 0 | Q9CR00     | 26S proteasome non-ATPase regulatory subunit 9                                                                              | Psm9                            |
| 0 | Q8VECA     | Calcium homeostasis modulator protein 2                                                                                     | Calhm2                          |
| 0 | P56389     | Cytidine deaminase                                                                                                          | Cda                             |
| 0 | Q9CV64     | Biliverdin reductase A                                                                                                      | Blvra                           |
| 0 | Q9JLV2     | Short transient receptor potential channel 4-associated protein                                                             | Trpc4ap                         |
| 0 | Q9CR80     | Protein FAM32A                                                                                                              | Fam32a                          |
| 0 | Q99MS8     | Tubulin polyglutamylase complex subunit 1                                                                                   | Tpgs1                           |
| 0 | A0A0A0M0M5 |                                                                                                                             | Macf1                           |
| 0 | Q3TNH5     | Protein FAM172A                                                                                                             | Fam172a                         |
| 0 | Q08789     | Max-binding protein MNT                                                                                                     | Mnt                             |
| 0 | Q91W57     | DEP domain-containing protein 7                                                                                             | Depdc7                          |
| 0 | Q9CZG3     | COMM domain-containing protein 8                                                                                            | Comm8                           |
| 0 | Q9D3E6     | Cohesin subunit SA-1                                                                                                        | Stag1                           |
| 0 | Q8C7Q4     | RNA-binding protein 4                                                                                                       | Gm21992i                        |
| 0 | H38B17     |                                                                                                                             | Methgl1;Mett17a1;UbiE2;Mett17a2 |
| 0 | P59997     | Lysine-specific demethylase 2A                                                                                              | Kdm2a                           |
| 0 | A2A4Z2     | Activating molecule in BECN1-regulated autophagy protein 1                                                                  | Ambrn1                          |
| 0 | Q3UHA3     | Spatzian                                                                                                                    | Spg11                           |
| 0 | Q3TL26     | Dimethyladenosine transferase 2, mitochondrial                                                                              | Gm1818;Tl                       |
| 0 | E9PVP1     |                                                                                                                             | Aim1                            |
| 0 | Q68F14     | Adenosylhomocysteinase;Putative adenosylhomocysteinase 3                                                                    | Ahcy12                          |
| 0 | Q9CR80     | Sorting nexin-24                                                                                                            | Snx24                           |
| 0 | Q9CR89     | MICOS complex subunit Mic19                                                                                                 | Chchd3                          |
| 0 | Q9JH22     | Progressive ankylosis protein                                                                                               | Ankh                            |
| 0 | Q88GB8     | Ubiquinone biosynthesis protein COQ4 homolog, mitochondrial                                                                 | Coq4                            |
| 0 | Q9R0M8     | UDP-glucose translocator                                                                                                    | Slc35a2                         |
| 0 | Q3ULF4     | Paragiglin                                                                                                                  | Spg7                            |
| 0 | Q9CWS4     | Integrator complex subunit 11                                                                                               | Cpf3l                           |
| 0 | F6ZD04     | Nucleoprotein TPR                                                                                                           | Tpr                             |
| 0 | Q6UWR6     | Myosin-14                                                                                                                   | Mylh14                          |
| 0 | Q08601     | Microsomal triglyceride transfer protein large subunit                                                                      | Mttp                            |
| 0 | Q9CQL0     | Protein N-lysine methyltransferase METTL21A                                                                                 | Mettl21a                        |
| 0 | Q03347     | Runt-related transcription factor 1                                                                                         | Runx1                           |
| 0 | Q9D0B6     | Serine/Arginine-related protein 53                                                                                          | Rsrc1                           |
| 0 | Q9C0R6     | Serine/threonine-protein phosphatase 6 catalytic subunit;Serine/threonine-protein phosphatase 6                             | Ppp6c                           |
| 0 | P6Z700     | Protein yippee-like 5                                                                                                       | Ypel5                           |
| 0 | Q9PBA9     | General transcription factor IIH subunit 1                                                                                  | Gtf2h1                          |
| 0 | Q6Q866     | Phosphotriesterase-related protein                                                                                          | Pter                            |
| 0 | P59114     | Phosphorylated CTD-interacting factor 1                                                                                     | Pcf1                            |
| 0 | Q79221     |                                                                                                                             | Try10                           |
| 0 | Q924H2     | Mediator of RNA polymerase II transcription subunit 15                                                                      | Med15                           |
| 0 | Q8K4D3     | Proton-coupled amino acid transporter 1                                                                                     | Slc36a1                         |
| 0 | Q9D011     | M-phase-specific PLK1-interacting protein                                                                                   | Gm7102;V                        |
| 0 | Q925N2     | Sideroflexin-2                                                                                                              | Sfxn2                           |
| 0 | P29352     | Protein-tyrosine-phosphatase;Tyrosine-protein phosphatase non-receptor type 22                                              | Ptpn22                          |
| 0 | A0A087WQY5 |                                                                                                                             | Scrap                           |
| 0 | Q8R080     | G2 and 5 phase-expressed protein 1                                                                                          | Gse1                            |
| 0 | Q77ME2     | Sperm-associated antigen 5                                                                                                  | Spag5                           |
| 0 | Q8K3G9     | DCC-interacting protein 13-beta                                                                                             | Appl2                           |
| 0 | P63260     | Actin, cytoplasmic 2;Actin, cytoplasmic 2, N-terminally processed                                                           | Actg1                           |
| 0 | Q921Q2     | Abhydrolase domain-containing protein 16A                                                                                   | Abhd16a                         |
| 0 | Q921G4     | V-type proton ATPase subunit a;V-type proton ATPase 116 kDa subunit a isoform 1                                             | Atp6v0a1                        |
| 0 | Q8VC17     | ATPase SWSAP1                                                                                                               | Swsap1                          |
| 0 | Q6NS82     | Protein FAM134A                                                                                                             | Fam134a                         |
| 0 | Q9C085     | Mitochondrial import inner membrane translocase subunit Tim22                                                               | Timm22                          |
| 0 | Q9CY28     | GTP-binding protein 8                                                                                                       | Gtpbp8                          |
| 0 | Q8CE96     | tRNA [adenine(58)-N(1)]-methyltransferase non-catalytic subunit TRM6                                                        | Trm6                            |
| 0 | Q8C3A0     | Iron-sulfur cluster co-chaperone protein Hsc68, mitochondrial                                                               | Hsc68                           |
| 0 | Q9D0V7     | Receptor-binding cancer antigen expressed on SiSo cells                                                                     | Ebag9                           |
| 0 | Q9D727     | Uncharacterized protein C6orf226 homolog                                                                                    |                                 |
| 0 | P62069     | Ubiquitin carboxyl-terminal hydrolase 12;Ubiquitin carboxyl-terminal hydrolase 46                                           | Usp46;Usp                       |
| 0 | Q8K190     | SAYSvN domain-containing protein 1                                                                                          | Saysd1                          |
| 0 | Q3UMY5     | Echinoderm microtubule-associated protein-like 4                                                                            | Em14                            |
| 0 | Q571H0     | Nucleolar pre-ribosomal-associated protein 1                                                                                | Urb1                            |
| 0 | Q921Y4     | Molybdate-anion transporter                                                                                                 | Mfsd5                           |
| 0 | Q9D7B1     | tRNA-dihydrouridine(20) synthase [NAD(P)+]-like                                                                             | Dus2                            |
| 0 | Q8U67      |                                                                                                                             | 231006104Rik                    |
| 0 | P73708     | Nuclear transcription factor Y subunit alpha                                                                                | Nfyb                            |
| 0 | Q9C0W0     | Diphthine synthase                                                                                                          | Dph5                            |
| 0 | P10810     | Monocyte differentiation antigen CD14                                                                                       | Cd14                            |
| 0 | Q3UJU9     | Regulator of microtubule dynamics protein 3                                                                                 | Rmdn3                           |
| 0 | E9PVG2     |                                                                                                                             | Trappc8                         |
| 0 | Q6P3A8     | 2-oxoisovalerate dehydrogenase subunit beta, mitochondrial                                                                  | Bckdhhb                         |
| 0 | Q8CHY3     | Dymedlin                                                                                                                    | Dym                             |
| 0 | P61963     | DOB1- and CUL4-associated factor 7                                                                                          | Dcaf7                           |
| 0 | Q88H55     | Threonine synthase-like 1                                                                                                   | Thns11                          |
| 0 | Q9C394     | Protein RUF3                                                                                                                | Rufy3                           |
| 0 | Q8D7V8     | CLIP-associating protein 1                                                                                                  | Clasp1                          |
| 0 | Q8R2L5     | 28S ribosomal protein S18c, mitochondrial                                                                                   | Mrps18c                         |
| 0 | Q04G90     | Neurofilomin                                                                                                                | Nfl                             |
| 0 | Q9D032     | Single-stranded DNA-binding protein 3                                                                                       | Ssbp3                           |
| 0 | Q6Q605     | NACHT, LRR and PYD domains-containing protein 4F                                                                            | Nlrp4f                          |
| 0 | Q88H65     | Protein DENND6A                                                                                                             | Dennd6a                         |
| 0 | Q6PDK2     | Histone-lysine N-methyltransferase;Histone-lysine N-methyltransferase 2D                                                    | Kmt2d                           |
| 0 | Q6DFV5     | Probable helicase with zinc finger domain                                                                                   | Helz                            |
| 0 | Q88M87     | Lethal[3]malignant brain tumor-like protein 3                                                                               | L3mbt3                          |
| 0 | Q9D0M5     | Dynein light chain 2, cytoplasmic                                                                                           | Dynl12                          |
| 0 | P97360     | Transcription factor ETV6                                                                                                   | Etv6                            |
| 0 | Q9QYB1     | Chloride intracellular channel protein 4                                                                                    | Clc4a                           |
| 0 | P10518     | Delta-aminolevulinic acid dehydratase                                                                                       | Alad                            |
| 0 | P97432     | Next to BRCA1 gene 1 protein                                                                                                | Nbr1                            |
| 0 | Q6N2B0     | DnaJ homolog subfamily C member 8                                                                                           | Dnajc8                          |
| 0 | Q6D773     | Cyclin-dependent kinase 4 inhibitor D                                                                                       | Cdkn2d                          |
| 0 | Q9E5T3     | Eukaryotic translation initiation factor 4E transporter                                                                     | Eif4enif1                       |
| 0 | Q9E5C8     | AF4/FR2 family member 4                                                                                                     | Aff4                            |
| 0 | Q88H17     | Elongation of very long chain fatty acids protein;Elongation of very long chain fatty acids protein 5                       | Elovl5                          |
| 0 | Q8R0J2     | Ras association domain-containing protein 6                                                                                 | Rasaf6                          |
| 0 | P70340     | Mothers against decapentaplegic homolog;Mothers against decapentaplegic homolog 1;Mothers against decapentaplegic homolog 1 | Smad1;Sm                        |
| 0 | Q9D084     | Centromere protein 5                                                                                                        | Ap1l1                           |
| 0 | Q8R2U6     | Diphosphoinositol polyphosphate phosphohydrolase 2                                                                          | Nudt4                           |
| 0 | Q3UR59     | Coiled-coil domain-containing protein 51                                                                                    | Cdc51                           |
| 0 | Q8CE50     | N-alpha-acetyltransferase 30                                                                                                | Naa30                           |
| 0 | Q9R1R2     | Tripartite motif-containing protein 3                                                                                       | Trim3                           |
| 0 | Q88MK0     | Centrosomal protein of 85 kDa                                                                                               | Cep85                           |
| 0 | Q3UHK6     | Teneurin-4;Teneurin-3;Teneurin-1;Ten-1 intracellular domain;Teneurin C-terminal-associated pep                              | Tennm4;Ter                      |
| 0 | Q9D8T4     | Golgi apparatus membrane protein TVP23 homolog 8                                                                            | Tvp23b                          |
| 0 | Q9WU62     | Inner centromere protein                                                                                                    | Incnp                           |

1

1

1

1

1

1

|      |         |         |         |        |
|------|---------|---------|---------|--------|
| 4274 | NaN     | 0.4345  | -1.2025 | 0.0040 |
| 4275 | NaN     | 0.0803  |         | 0.0435 |
| 4276 | 0.0678  | NaN     | NaN     | 0.0464 |
| 4277 | NaN     | 0.0395  | 0.3041  | 0.0467 |
| 4278 | NaN     | 0.0395  | NaN     | 0.0480 |
| 4279 | 0.0088  | NaN     | NaN     | 0.0480 |
| 4280 | NaN     | 0.0395  | NaN     | 0.0484 |
| 4281 | NaN     | 0.3300  | -0.2310 | 0.0525 |
| 4282 | NaN     | 0.0530  | 0.0514  | 0.0525 |
| 4283 | 0.0058  | NaN     | NaN     | 0.0526 |
| 4284 | NaN     | 0.7546  | -0.6460 | 0.0543 |
| 4285 | -0.6167 | 0.7235  | NaN     | 0.0562 |
| 4286 | NaN     | 0.0950  | -0.8512 | 0.0563 |
| 4287 | NaN     | -0.4153 | 0.5297  | 0.0572 |
| 4288 | NaN     | 0.0395  | NaN     | 0.0581 |
| 4289 | 0.0058  | NaN     | NaN     | 0.0581 |
| 4290 | NaN     | NaN     | NaN     | 0.0589 |
| 4291 | 0.0058  | NaN     | NaN     | 0.0589 |
| 4292 | NaN     | -0.6120 | 0.7237  | 0.0619 |
| 4293 | 0.3088  | 0.0058  | NaN     | 0.0621 |
| 4294 | -0.6096 | NaN     | 0.7348  | 0.0626 |
| 4295 | -0.1464 | NaN     | 0.8053  | 0.0632 |
| 4296 | -0.4566 | NaN     | NaN     | 0.0633 |
| 4297 | NaN     | 0.8068  | -0.8081 | 0.0670 |
| 4298 | -0.1846 | NaN     | NaN     | 0.0679 |
| 4299 | NaN     | 0.6272  | 0.7636  | 0.0682 |
| 4300 | -0.4539 | NaN     | 0.1110  | 0.0685 |
| 4301 | NaN     | 0.0838  | 0.2198  | 0.0686 |
| 4302 | 0.0068  | NaN     | NaN     | 0.0689 |
| 4303 | NaN     | 0.6705  | -0.5314 | 0.0696 |
| 4304 | 0.0707  | NaN     | NaN     | 0.0707 |
| 4305 | 0.0718  | NaN     | NaN     | 0.0717 |
| 4306 | NaN     | -0.1891 | 0.3140  | 0.0724 |
| 4307 | 0.4085  | -0.7468 | NaN     | 0.0747 |
| 4308 | 0.0798  | NaN     | NaN     | 0.0750 |
| 4309 | 0.0758  | NaN     | NaN     | 0.0752 |
| 4310 | 0.0777  | NaN     | NaN     | 0.0777 |
| 4311 | 0.0795  | NaN     | NaN     | 0.0796 |
| 4312 | -0.0438 | NaN     | -0.6518 | 0.0811 |
| 4313 | 0.0818  | NaN     | NaN     | 0.0813 |
| 4314 | NaN     | -0.2950 | -1.0647 | 0.0813 |
| 4315 | NaN     | 0.0828  | NaN     | 0.0823 |
| 4316 | -0.3320 | -0.3208 | NaN     | 0.0824 |
| 4317 | NaN     | 0.0900  | -0.0779 | 0.0836 |
| 4318 | -0.2464 | NaN     | NaN     | 0.0843 |
| 4319 | NaN     | NaN     | NaN     | 0.0848 |
| 4320 | NaN     | -0.1296 | -0.4039 | 0.0853 |
| 4321 | 0.4354  | NaN     | -0.2678 | 0.0856 |
| 4322 | 0.0858  | NaN     | NaN     | 0.0858 |
| 4323 | 0.4030  | NaN     | NaN     | 0.0860 |
| 4324 | NaN     | NaN     | 0.1658  | 0.0886 |
| 4325 | NaN     | NaN     | 0.0893  | 0.0893 |
| 4326 | NaN     | 0.1080  | 0.0708  | 0.0894 |
| 4327 | 0.1200  | NaN     | 0.3207  | 0.0900 |
| 4328 | 0.0918  | NaN     | NaN     | 0.0913 |
| 4329 | 0.0918  | NaN     | NaN     | 0.0914 |
| 4330 | -0.0678 | -0.2318 | NaN     | 0.0918 |
| 4331 | NaN     | 0.3014  | -0.1138 | 0.0930 |
| 4332 | 0.0968  | NaN     | NaN     | 0.0962 |
| 4333 | 0.4276  | NaN     | -0.2323 | 0.0977 |
| 4334 | NaN     | 0.1763  | NaN     | 0.0983 |
| 4335 | NaN     | 0.0988  | NaN     | 0.0984 |
| 4336 | 0.0988  | NaN     | NaN     | 0.0986 |
| 4337 | NaN     | 1.0216  | -0.3028 | 0.0987 |
| 4338 | NaN     | NaN     | 0.0987  | 0.0987 |
| 4339 | 0.0990  | NaN     | NaN     | 0.0991 |
| 4340 | NaN     | NaN     | -0.4014 | 0.1011 |
| 4341 | 0.1036  | NaN     | NaN     | 0.1036 |
| 4342 | 0.1058  | NaN     | NaN     | 0.1058 |
| 4343 | 0.1059  | NaN     | NaN     | 0.1059 |
| 4344 | NaN     | 0.2177  | NaN     | 0.1067 |
| 4345 | 0.1077  | NaN     | NaN     | 0.1077 |
| 4346 | NaN     | 0.1091  | NaN     | 0.1091 |
| 4347 | NaN     | 1.3214  | 1.7391  | 0.1102 |
| 4348 | NaN     | NaN     | 0.1109  | 0.1103 |
| 4349 | NaN     | 0.0968  | 0.3120  | 0.1105 |
| 4350 | -0.1118 | NaN     | NaN     | 0.1113 |
| 4351 | NaN     | NaN     | 0.1138  | 0.1138 |
| 4352 | NaN     | 0.0000  | 0.2018  | 0.1169 |
| 4353 | 0.1750  | -0.7356 | NaN     | 0.1192 |
| 4354 | NaN     | -0.1056 | 0.3462  | 0.1203 |
| 4355 | NaN     | 0.9018  | -0.8578 | 0.1220 |
| 4356 | NaN     | -0.1356 | 0.3807  | 0.1226 |
| 4357 | 0.1238  | NaN     | NaN     | 0.1236 |
| 4358 | 0.1248  | NaN     | NaN     | 0.1245 |
| 4359 | -0.8978 | -0.6388 | NaN     | 0.1248 |
| 4360 | NaN     | -0.2788 | -0.1230 | 0.1259 |
| 4361 | 0.2540  | NaN     | -0.3600 | 0.1278 |
| 4362 | 0.0000  | NaN     | NaN     | 0.1291 |
| 4363 | 0.1297  | NaN     | NaN     | 0.1297 |
| 4364 | -5.0509 | NaN     | NaN     | 0.1313 |
| 4365 | NaN     | -0.0605 | -0.1628 | 0.1327 |
| 4366 | 0.1351  | NaN     | NaN     | 0.1351 |
| 4367 | NaN     | 0.8759  | -0.3993 | 0.1383 |
| 4368 | 0.1388  | NaN     | NaN     | 0.1393 |
| 4369 | NaN     | -0.1076 | 0.3813  | 0.1394 |
| 4370 | NaN     | 0.1138  | 0.4693  | 0.1408 |
| 4371 | NaN     | 0.0663  | 0.2167  | 0.1415 |
| 4372 | NaN     | NaN     | -0.0870 | 0.1415 |
| 4373 | 0.1432  | NaN     | NaN     | 0.1432 |
| 4374 | 0.1257  | 0.5880  | NaN     | 0.1433 |
| 4375 | 0.1438  | NaN     | NaN     | 0.1438 |
| 4376 | 0.2241  | NaN     | -0.0648 | 0.1443 |
| 4377 | 0.1444  | NaN     | NaN     | 0.1444 |
| 4378 | 0.1460  | NaN     | -0.1859 | 0.1445 |
| 4379 | NaN     | 0.1458  | NaN     | 0.1450 |
| 4380 | 0.1458  | NaN     | NaN     | 0.1457 |
| 4381 | -0.0040 | NaN     | -0.5415 | 0.1496 |
| 4382 | 0.1497  | NaN     | NaN     | 0.1497 |
| 4383 | 0.1505  | NaN     | NaN     | 0.1505 |
| 4384 | 0.0618  | NaN     | -0.0478 | 0.1520 |
| 4385 | 0.1526  | NaN     | NaN     | 0.1526 |
| 4386 | 0.6380  | NaN     | -0.0578 | 0.1532 |
| 4387 | NaN     | 0.2098  | 0.3809  | 0.1548 |
| 4388 | NaN     | 0.7221  | 0.2634  | 0.1554 |
| 4389 | 0.0938  | NaN     | NaN     | 0.1557 |
| 4390 | 0.3810  | NaN     | NaN     | 0.1561 |
| 4391 | 0.1605  | NaN     | NaN     | 0.1605 |
| 4392 | 0.1607  | NaN     | NaN     | 0.1607 |
| 4393 | NaN     | 0.5410  | -0.2246 | 0.1617 |
| 4394 | NaN     | 0.1278  | 0.4939  | 0.1660 |
| 4395 | -0.5753 | -0.2078 | NaN     | 0.1666 |
| 4396 | NaN     | 0.2769  | -0.2145 | 0.1672 |
| 4397 | NaN     | -0.2251 | 0.2280  | 0.1675 |
| 4398 | NaN     | -0.2251 | 0.6124  | 0.1687 |
| 4399 | 0.1689  | NaN     | NaN     | 0.1694 |

|   |          |                                                                                                     |
|---|----------|-----------------------------------------------------------------------------------------------------|
| 0 | Q8Q2T1   | Acetyl-CoA acetyltransferase, mitochondrial                                                         |
| 0 | Q99JH8   | ER lumen protein-retaining receptor 1                                                               |
| 0 | O88286   | Protein Wiz                                                                                         |
| 0 | Q8C128   | RNA methyltransferase 10 homolog A                                                                  |
| 0 | P97819   | 85/88 kDa calcium-independent phospholipase A2                                                      |
| 0 | O8Q2C4   | Myotubularin-related protein 1                                                                      |
| 0 | Q8Q5V4   | E3 ubiquitin-protein ligase MIB1                                                                    |
| 0 | P99029   | Peroxisedoxin-5, mitochondrial                                                                      |
| 0 | Q9QYU0   | GRB2-associated-binding protein 1                                                                   |
| 0 | Q9DBF7   | Pre-mRNA-splicing factor CWC25 homolog                                                              |
| 0 | Q9ER81   | Torsin-1A-interacting protein 2, isoform IFRG15                                                     |
| 0 | Q640M1   | U3 small nuclear RNA-associated protein 14 homolog A                                                |
| 0 | P69566   | Ran-binding protein 9                                                                               |
| 0 | Q55555   |                                                                                                     |
| 0 | Q9CX99   | GPI-anchor transamidase                                                                             |
| 0 | P24860   | G2/mitotic-specific cyclin-B1                                                                       |
| 0 | Q61879   | Myosin-10                                                                                           |
| 0 | Q3U1T3   | Breast cancer metastasis-suppressor 1-like protein                                                  |
| 0 | O08709   | Peroxisedoxin-6                                                                                     |
| 0 | Q9CQK7   | RWD domain-containing protein 1                                                                     |
| 0 | Q55UE8   | Ankyrin repeat domain-containing protein 40                                                         |
| 0 | E9Q723   |                                                                                                     |
| 0 | P41230   | Lysine-specific demethylase 5C                                                                      |
| 0 | Q5H2H2   | Ribosome biogenesis protein TSR3 homolog                                                            |
| 0 | Q99992   | 39S ribosomal protein L27, mitochondrial                                                            |
| 0 | Q8CF89   | TGF-beta-activated kinase 1 and MAP3K7-binding protein 1                                            |
| 0 | Q8Q735   | Uncharacterized protein C19orf43 homolog                                                            |
| 0 | Q8C351   | Laylin                                                                                              |
| 0 | Q9ER40   | Alpha-globin transcription factor CP2;Upstream-binding protein 1                                    |
| 0 | Q88XN9   | Transmembrane protein 87A                                                                           |
| 0 | Q99MK9   | Ras association domain-containing protein 1                                                         |
| 0 | Q9EQM6   | Microprocessor complex subunit DGCR8                                                                |
| 0 | P70349   | Histidine triad nucleotide-binding protein 1                                                        |
| 0 | Q8B0J8   | Integrator complex subunit 2                                                                        |
| 0 | Q8R129   | RING finger protein 121                                                                             |
| 0 | Q2AFR3   | FERM and POZ domain-containing protein 4                                                            |
| 0 | Q8B878   | Transcriptional regulator Kaiso                                                                     |
| 0 | O88196   | E3 ubiquitin-protein ligase TTC3                                                                    |
| 0 | Q9D914   | TBC1 domain family member 20                                                                        |
| 0 | Q9CQ69   | Cytochrome b-c1 complex subunit 8                                                                   |
| 0 | Q35083   | 1-acyl-sn-glycerol-3-phosphate acyltransferase alpha;1-acyl-sn-glycerol-3-phosphate acyltransferase |
| 0 | Q9QXW1   | Junction-mediating and -regulatory protein                                                          |
| 0 | Q8ORV5   | Scaffold attachment factor B2                                                                       |
| 0 | Q9JH16   | Alcohol dehydrogenase [NADP(+)]                                                                     |
| 0 | Q9WUJ8   | Origin recognition complex subunit 6                                                                |
| 0 | Q92715   | Lysoyl oxidase homolog 3                                                                            |
| 0 | Q98P93   | S-formylglutathione hydrolase                                                                       |
| 0 | A2AJU0   | MAP7 domain-containing protein 1                                                                    |
| 0 | P53762   | Aryl hydrocarbon receptor nuclear translocator                                                      |
| 0 | Q99P69   | Kinetochore protein Nuf2                                                                            |
| 0 | O88848   | ADP-ribosylation factor-like protein 6                                                              |
| 0 | A2AP88   | Targeting protein for Xlbp2                                                                         |
| 0 | Q9D059   | Histidine triad nucleotide-binding protein 2, mitochondrial                                         |
| 0 | Q9R207   | Nibrin                                                                                              |
| 0 | Q552Y2   | Biorientation of chromosomes in cell division protein 1                                             |
| 0 | Q3U4D2   | Glucose-Fructose oxidoreductase domain-containing protein 1                                         |
| 0 | Q3T8W2   | 39S ribosomal protein L10, mitochondrial                                                            |
| 0 | Q69272   | RAB6A-GEF complex partner protein 1                                                                 |
| 0 | O88508   | DNA (cytosine-5)-methyltransferase 3A                                                               |
| 0 | Q5ND52   | rRNA methyltransferase 3, mitochondrial                                                             |
| 0 | Q8VE82   | Protein salvador homolog 1                                                                          |
| 0 | Q9R1P1   | Proteasome subunit beta type-3                                                                      |
| 0 | P61294   | Ras-related protein Rab-6B                                                                          |
| 0 | Q9D2N4   | Dystrobrein;Dystrobrein alpha                                                                       |
| 0 | A5A4Y9   |                                                                                                     |
| 0 | Q4U2N1   | E3 ubiquitin-protein ligase HERC2                                                                   |
| 0 | Q91222   |                                                                                                     |
| 0 | Q35144   | Telomeric repeat-binding factor 2                                                                   |
| 0 | Q8V0Y4   | EF-hand calcium-binding domain-containing protein 7                                                 |
| 0 | Q9CQY0   | Small integral membrane protein 8                                                                   |
| 0 | Q99MR8   | Methylcrotonoyl-CoA carboxylase subunit alpha, mitochondrial                                        |
| 0 | Q8QY77   | Myomegalin                                                                                          |
| 0 | Q9D2V7   | Coronin-7                                                                                           |
| 0 | P17095   | High mobility group protein HMG-I/HMG-Y                                                             |
| 0 | P05531   | X-linked lymphocyte-regulated protein PM1                                                           |
| 0 | Q98059   | Four and a half LIM domains protein 3                                                               |
| 0 | Q9U1C9   | Homocysteine-responsive endoplasmic reticulum-resident ubiquitin-like domain member 2 protein       |
| 0 | Q9QX51   | Plectin                                                                                             |
| 0 | Q61584   | Fragile X mental retardation syndrome-related protein 1                                             |
| 0 | P61961   | Ubiquitin-fold modifier 1                                                                           |
| 0 | Q8QY0Y   | Serine/threonine-protein phosphatase 4 regulatory subunit 4                                         |
| 0 | E9Q9C3   |                                                                                                     |
| 0 | Q9D014   | Syntaxin-17                                                                                         |
| 0 | E9QAP7   |                                                                                                     |
| 0 | Q8B6Z4   | Cell division cycle protein 23 homolog                                                              |
| 0 | Q99PH3   | Tripartite motif-containing protein 26                                                              |
| 0 | Q8Q0Y4   |                                                                                                     |
| 0 | Q8B259   | Putative pre-mRNA-splicing factor ATP-dependent RNA helicase DHX32                                  |
| 0 | Q8BH24   | Zinc finger protein 592                                                                             |
| 0 | Q6R724   | Kinesin-like protein;Centromere-associated protein E                                                |
| 0 | Q9D408   | SAGA-associated factor 29 homolog                                                                   |
| 0 | P26040   | Ezrin                                                                                               |
| 0 | Q8C051   | DIS3-like exonuclease 1                                                                             |
| 0 | Q9QXW0   | Abhydrolase domain-containing protein 2                                                             |
| 0 | Q9WV30   | Nuclear factor of activated T-cells 5                                                               |
| 0 | A45952   | Medium-chain specific acyl-CoA dehydrogenase, mitochondrial                                         |
| 0 | Q9R008   | Mevalonate kinase                                                                                   |
| 0 | O88427   | Voltage-dependent T-type calcium channel subunit alpha-1H                                           |
| 0 | Q9CWP6   | Motile sperm domain-containing protein 2                                                            |
| 0 | F6R059   |                                                                                                     |
| 0 | Q99ME2   | WD repeat-containing protein 6                                                                      |
| 0 | FXLUV1   |                                                                                                     |
| 0 | Q9CQ72   | RNA-binding protein 7                                                                               |
| 0 | Q8Q237   | E3 ubiquitin-protein ligase Topors                                                                  |
| 0 | Q9Z078   | Disintegrin and metalloproteinase domain-containing protein 17                                      |
| 0 | Q8B1R9   | Hypoxia-inducible factor 1-alpha inhibitor                                                          |
| 0 | Q8R3L2   | Transcription factor 25                                                                             |
| 0 | Q8VC03   | Echlinoderm microtubule-associated protein-like 3                                                   |
| 0 | Q5U431   | G-protein coupled receptor 39                                                                       |
| 0 | Q31093   |                                                                                                     |
| 0 | Q8B7P1   | RNA binding protein fox-1 homolog 2                                                                 |
| 0 | Q5R611   | Nuclear protein 10                                                                                  |
| 0 | Q9U1Z5   |                                                                                                     |
| 0 | Q9D1R9   | 60S ribosomal protein L34                                                                           |
| 0 | Q9D892   | Inosine triphosphate pyrophosphatase                                                                |
| 0 | Q9P9R1   | ATP-dependent RNA helicase DDX51                                                                    |
| 0 | Q9C0L0   | Md1-interacting protein 1                                                                           |
| 0 | Q9ERH4   | Nucleolar and spindle-associated protein 1                                                          |
| 0 | Q6ZQF7   | Protein Jade-2                                                                                      |
| 0 | Q8C3Q9   | Caspase;Caspase-9;Caspase-9 subunit p35;Caspase-9 subunit p10                                       |
| 0 | Q3TQY9-3 | Uncharacterized protein C1orf112 homolog                                                            |
| 0 | Q61586   | Glycerol-3-phosphate acyltransferase 1, mitochondrial                                               |
| 0 | Q3U2W7   | Protein-lysine N-methyltransferase EEF2KMT                                                          |
| 0 | Q9R0P6   | Signal peptidase complex catalytic subunit SEC11;Signal peptidase complex catalytic subunit SEC1    |
| 0 | Q9U0I8   | Serine incorporator 1                                                                               |
| 0 | Q9D8N6   | Protein lin-37 homolog                                                                              |

|          |            |
|----------|------------|
| Acat1    | mmu:110446 |
| Kdelr1   | mmu:68137  |
| Wiz      | mmu:22404  |
| Trmt10a  | mmu:108943 |
| Pla2g6   | mmu:53357  |
| Mtmr1    | mmu:53332  |
| Mib1     | mmu:253164 |
| Prdx5    | mmu:54683  |
| Gab1     | mmu:14388  |
| Cwc25    | mmu:67480  |
| Tor1aip2 | mmu:240832 |
| Utp14a   | mmu:72554  |
| Ranbp9   | mmu:56705  |
| Ehbp1    |            |
| Pigk     | mmu:329777 |
| Ccnb1    | mmu:268697 |
| Mylh10   | mmu:77579  |
| Brsn1l   | mmu:52592  |
| Prdx6    | mmu:11758  |
| Rwdtd1   | mmu:66521  |
| Ankrd40  | mmu:71452  |
| Ttc13    |            |
| Kdm5c    | mmu:20591  |
| Tsr3     | mmu:68327  |
| Mrlp27   | mmu:94064  |
| Tab1     | mmu:66513  |
|          | mmu:68544  |
| Layn     | mmu:244864 |
| Tfcp2l1  | mmu:21422  |
| Tmem87a  | mmu:211499 |
| Rassf1   | mmu:56289  |
| Dgcr8    | mmu:94223  |
| Hint1    | mmu:15254  |
| Ints2    | mmu:70422  |
| Rnf121   | mmu:75212  |
| Fmpd4    | mmu:333605 |
| Zbtb33   | mmu:56805  |
| Ttc3     |            |
| Tbcd120  | mmu:67231  |
| Uqcqr    | mmu:22272  |
| Agpat1   | mmu:55979  |
| Jmy      | mmu:57748  |
| Safb2    | mmu:224902 |
| Akr1a1   | mmu:58810  |
| Orc6     |            |
| Lox3     | mmu:16950  |
| Eid      | mmu:13885  |
| Map7d1   | mmu:245877 |
| Arint    | mmu:11863  |
| Nuf2     | mmu:66977  |
| Arf6     | mmu:56297  |
| Tpx2     | mmu:72119  |
| Hint2    | mmu:68917  |
| Nbn      | mmu:27354  |
| Bod1     | mmu:69556  |
| Gfod1    | mmu:328232 |
| Mrlp10   | mmu:107732 |
| Rc1c     |            |
| Dnm13a   | mmu:13435  |
| Rnm11    | mmu:67390  |
| Sav1     | mmu:64010  |
| Psmb3    | mmu:26446  |
| Rab6b    | mmu:270192 |
| Dtna     | mmu:13527  |
| Ppp1r11  | mmu:76497  |
| Herc2    | mmu:15204  |
| Ragap1   |            |
| Terf2    | mmu:21750  |
| Efcab7   | mmu:230500 |
| Smm8     | mmu:66291  |
| Mccc1    | mmu:72039  |
| Pde4dip  | mmu:83679  |
| Coro7    | mmu:788    |

|      |         |         |         |
|------|---------|---------|---------|
| 4400 | NaN     | 0.5453  | 0.1601  |
| 4401 | 0.1700  | NaN     | 0.1700  |
| 4402 | 0.2363  | 0.3235  | 0.1702  |
| 4403 | -0.1023 | 0.4855  | 0.1715  |
| 4404 | 0.1719  | NaN     | 0.1719  |
| 4405 | -0.2975 | 0.1719  | 0.1724  |
| 4406 | NaN     | 0.1724  | 0.1734  |
| 4407 | NaN     | 0.1952  | 0.1511  |
| 4408 | 0.1524  | 0.1936  | 0.1732  |
| 4409 | 0.1773  | NaN     | 0.1773  |
| 4410 | -0.3708 | NaN     | 0.7268  |
| 4411 | 0.6459  | -0.7268 | NaN     |
| 4412 | 0.1788  | NaN     | 0.1788  |
| 4413 | NaN     | 0.1354  | 0.2223  |
| 4414 | NaN     | 0.4474  | -0.0844 |
| 4415 | -0.1759 | NaN     | 0.1799  |
| 4416 | NaN     | NaN     | -0.1834 |
| 4417 | -0.4481 | -1.3368 | 0.1802  |
| 4418 | 0.1810  | NaN     | NaN     |
| 4419 | 0.1810  | NaN     | 0.1816  |
| 4420 | -0.6786 | NaN     | 1.8724  |
| 4421 | NaN     | 0.4103  | -0.5151 |
| 4422 | 0.1858  | NaN     | 0.1854  |
| 4423 | NaN     | 0.3437  | 0.1886  |
| 4424 | 0.3368  | NaN     | 0.1901  |
| 4425 | -0.4993 | NaN     | 0.1904  |
| 4426 | NaN     | 0.2385  | -0.0926 |
| 4427 | NaN     | 0.1946  | 0.1940  |
| 4428 | 0.1940  | NaN     | 0.1949  |
| 4429 | 0.1965  | NaN     | 0.1965  |
| 4430 | 0.3300  | NaN     | 0.1971  |
| 4431 | NaN     | 0.1974  | 0.1974  |
| 4432 | NaN     | 0.8277  | 0.1982  |
| 4433 | NaN     | NaN     | 0.1985  |
| 4434 | -0.2876 | 0.1059  | 0.1986  |
| 4435 | NaN     | 0.1059  | -0.2548 |
| 4436 | NaN     | 0.2016  | 0.2016  |
| 4437 | -1.1337 | 0.7725  | 0.2019  |
| 4438 | NaN     | 0.4074  | 0.2026  |
| 4439 | 0.2039  | NaN     | 0.2039  |
| 4440 | NaN     | 1.3178  | 0.7718  |
| 4441 | 0.6619  | NaN     | 0.2055  |
| 4442 | NaN     | 0.3813  | 0.2057  |
| 4443 | -0.9990 | 0.2322  | 0.2057  |
| 4444 | NaN     | 0.4631  | -0.0301 |
| 4445 | -0.2867 | NaN     | 0.8547  |
| 4446 | NaN     | 0.8411  | -0.5216 |
| 4447 | -0.2135 | NaN     | 0.2135  |
| 4448 | NaN     | 0.3770  | 0.2138  |
| 4449 | NaN     | 0.4367  | 0.2154  |
| 4450 | NaN     | 0.2159  | 0.2159  |
| 4451 | -0.3578 | NaN     | -0.1903 |
| 4452 | -0.1207 | NaN     | 0.2201  |
| 4453 | NaN     | 0.4392  | 0.2205  |
| 4454 | NaN     | -0.4381 | 0.8791  |
| 4455 | -0.2238 | NaN     | 0.2242  |
| 4456 | -0.2238 | NaN     | 0.2249  |
| 4457 | -0.2249 | NaN     | 0.2247  |
| 4458 | NaN     | 0.1501  | 0.3003  |
| 4459 | NaN     | -0.1192 | 0.5520  |
| 4460 | NaN     | 0.3667  | -0.1131 |
| 4461 | -0.0635 | 0.5228  | NaN     |
| 4462 | 0.2259  | NaN     | 0.2259  |
| 4463 | NaN     | 0.3269  | 0.2303  |
| 4464 | -0.2267 | NaN     | 0.2327  |
| 4465 | NaN     | 0.4628  | -0.3798 |
| 4466 | NaN     | 0.2328  | 0.2338  |
| 4467 | NaN     | -0.1620 | -0.3033 |
| 4468 | NaN     | 0.4452  | 0.2348  |
| 4469 | 0.2359  | NaN     | 0.2359  |
| 4470 | -0.1393 | NaN     | 0.2359  |
| 4471 | NaN     | 0.0872  | 0.5805  |
| 4472 | NaN     | 0.3276  | 0.1489  |
| 4473 | NaN     | NaN     | 0.2404  |
| 4474 | NaN     | 0.7285  | -0.0929 |
| 4475 | -0.2359 | NaN     | 0.2483  |
| 4476 | -0.5504 | -0.1939 | 0.2498  |
| 4477 | -0.1726 | 0.2209  | 0.2441  |
| 4478 | NaN     | 0.0826  | 0.4047  |
| 4479 | 0.2475  | NaN     | 0.2475  |
| 4480 | 0.2482  | NaN     | 0.2482  |
| 4481 | NaN     | 0.8308  | 0.2524  |
| 4482 | 0.2528  | NaN     | 0.2525  |
| 4483 | NaN     | 1.1081  | 0.7438  |
| 4484 | -0.3067 | 0.2044  | 0.2581  |
| 4485 | NaN     | -0.6592 | 0.2586  |
| 4486 | NaN     | 0.2592  | 0.2575  |
| 4487 | NaN     | 0.9115  | -0.3957 |
| 4488 | NaN     | 0.2645  | 0.2645  |
| 4489 | NaN     | 0.5150  | 0.2656  |
| 4490 | 0.2735  | NaN     | 0.2735  |
| 4491 | NaN     | 0.2753  | 0.2753  |
| 4492 | NaN     | 0.3148  | 0.2755  |
| 4493 | -0.1388 | NaN     | 0.2780  |
| 4494 | NaN     | -0.1059 | -0.7259 |
| 4495 | NaN     | 0.0248  | -0.6830 |
| 4496 | -0.2869 | NaN     | 0.2801  |
| 4497 | NaN     | 0.8351  | -0.3344 |
| 4498 | 0.2833  | NaN     | 0.2833  |
| 4499 | 0.6362  | NaN     | 0.2897  |
| 4500 | 0.6525  | -0.3891 | NaN     |
| 4501 | 0.2925  | NaN     | 0.2925  |
| 4502 | 1.1697  | NaN     | 0.8947  |
| 4503 | 0.5256  | 0.3580  | 0.2932  |
| 4504 | NaN     | 0.2948  | 0.2948  |
| 4505 | NaN     | 0.2959  | 0.2959  |
| 4506 | 0.2973  | NaN     | 0.2973  |
| 4507 | 0.1400  | NaN     | -0.6353 |
| 4508 | 0.2253  | NaN     | 0.2989  |
| 4509 | 0.2991  | NaN     | 0.2991  |
| 4510 | NaN     | 0.3001  | 0.3001  |
| 4511 | 0.3016  | NaN     | 0.3016  |
| 4512 | 0.4007  | NaN     | 0.3065  |
| 4513 | 0.3050  | NaN     | 0.3050  |
| 4514 | 0.3054  | NaN     | 0.3083  |
| 4515 | -0.4718 | NaN     | 0.3086  |
| 4516 | NaN     | -0.3086 | 0.3086  |
| 4517 | -0.3078 | NaN     | 0.3075  |
| 4518 | NaN     | 0.2970  | 0.3194  |
| 4519 | NaN     | -0.3968 | 1.0186  |
| 4520 | NaN     | 0.8325  | -0.7460 |
| 4521 | -0.4376 | NaN     | 1.3909  |
| 4522 | NaN     | 1.0197  | -0.3870 |
| 4523 | -0.1168 | NaN     | 0.3198  |
| 4524 | NaN     | 0.0991  | -0.5486 |
| 4525 | NaN     | 0.7367  | -0.0858 |

|   |            |                                                                                              |
|---|------------|----------------------------------------------------------------------------------------------|
| 0 | P97863     | Nuclear factor 1;Nuclear factor 1 B-type                                                     |
| 0 | A0A0U1RN23 |                                                                                              |
| 0 | Q8V163     | MOB kinase activator 2                                                                       |
| 0 | Q9D0868    | Peptidyl-prolyl cis-trans isomerase;Peptidyl-prolyl cis-trans isomerase H                    |
| 0 | Q6A058     | Armadillo repeat-containing X-linked protein 2                                               |
| 0 | Q99AP8     | BRCA1-associated protein                                                                     |
| 0 | Q35350     | Calpain-1 catalytic subunit                                                                  |
| 0 | Q9WV91     | Prostaglandin F2 receptor negative regulator                                                 |
| 0 | Q9J178     | Peptide-N(4)-(N-acetyl-beta-glucosaminyl)asparagine amidase                                  |
| 0 | A2AKX3     | Probable helicase senataxin                                                                  |
| 0 | Q8B5F4     | Phosphatidylserine decarboxylase proenzyme;Phosphatidylserine decarboxylase alpha chain;Phos |
| 0 | Q60960     | Importin subunit alpha-5;Importin subunit alpha-5, N-terminally processed                    |
| 0 | Q8VY83     | Dixin                                                                                        |
| 0 | Q91WD1     | DNA-directed RNA polymerase III subunit RPC4                                                 |
| 0 | Q8VHL1     | Histone-lysine N-methyltransferase SETD7                                                     |
| 0 | Q60824     | Cold-inducible RNA-binding protein                                                           |
| 0 | Q9CQX6     |                                                                                              |
| 0 | Q8BQX5     | Transmembrane and coiled-coil domain-containing protein 6                                    |
| 0 | Q8C167     | Prolyl endopeptidase-like                                                                    |
| 0 | Q8B7Y4     | Retinol dehydrogenase 12                                                                     |
| 0 | Q58FA4     | Transcription factor E2F8                                                                    |
| 0 | Q9CZG6     | Nuclear distribution protein nudE homolog 1                                                  |
| 0 | Q8Y2A5     |                                                                                              |
| 0 | A8Y558     | NCK-interacting protein with SH3 domain                                                      |
| 0 | Q9ES14     | Protein NEDD1                                                                                |
| 0 | Q35215     | Intraflagellar transport protein 81 homolog                                                  |
| 0 | Q5XK05     | Diphthamide biosynthesis protein 1                                                           |
| 0 | Q91V09     | WD repeat-containing protein 13                                                              |
| 0 | G3XA66     |                                                                                              |
| 0 | Q8C7V8     | Coiled-coil domain-containing protein 134                                                    |
| 0 | Q8CFE2     | UPF0609 protein C4orf27 homolog                                                              |
| 0 | Q9J129     | Phospholipid scramblase 3                                                                    |
| 0 | Q6KAQ7     | ZZ-type zinc finger-containing protein 3                                                     |
| 0 | Q9D0L7     | Armadillo repeat-containing protein 10                                                       |
| 0 | Q63892     | V-type proton ATPase 16 kDa proteolipid subunit                                              |
| 0 | Q92359     | Ras-related protein Rab-30                                                                   |
| 0 | Q8B424     | ETS translocation variant 3                                                                  |
| 0 | Q8V6E4     | Exonuclease 3-5 domain-containing protein 2                                                  |
| 0 | Q6P851     | Coiled-coil domain-containing protein 117                                                    |
| 0 | Q9WU02     | Prolactin regulatory element-binding protein                                                 |
| 0 | Q9R0Y5     | Adenylate kinase isoenzyme 1                                                                 |
| 0 | Q8B522     | AP-3 complex subunit sigma-2                                                                 |
| 0 | P62488     | DNA-directed RNA polymerase II subunit RPB7                                                  |
| 0 | Q8R418     | Endonuclease Dicer                                                                           |
| 0 | Q921H9     | Cytochrome c oxidase assembly factor 7                                                       |
| 0 | Q9C8B2     | H/ACA ribonucleoprotein complex subunit 2                                                    |
| 0 | Q5XK05     | Protein jagunal homolog 1                                                                    |
| 0 | Q92DQ6     | RNA-binding protein Musashi homolog 2                                                        |
| 0 | Q9EP14     | Methyltransferase-like protein 9                                                             |
| 0 | Q5SRV7     | F-box/WD repeat-containing protein 11                                                        |
| 0 | Q9D924     | Iron-sulfur cluster assembly 1 homolog, mitochondrial                                        |
| 0 | Q8K305     | Kinetochore-associated protein NSL1 homolog                                                  |
| 0 | Q8BT14     | CCR4-NOT transcription complex subunit 4                                                     |
| 0 | P58058     | NAD kinase                                                                                   |
| 0 | Q8C0C2     | Autophagy-related protein 16-1                                                               |
| 0 | Q92D27     | Zinc finger protein 687                                                                      |
| 0 | Q61206     | Platelet-activating factor acetylhydrolase IB subunit beta                                   |
| 0 | Q8R4Y8     | Rotatin                                                                                      |
| 0 | Q5U5M8     | Biogenesis of lysosome-related organelles complex 1 subunit 3                                |
| 0 | Q8B8X4     | Oxysterol-binding protein-related protein 2                                                  |
| 0 | Q8LUP8     | Sodium-dependent phosphate transporter 2                                                     |
| 0 | Q9CJQ7     | Securin                                                                                      |
| 0 | Q9DAZ9     | Abscission/NoCut checkpoint regulator                                                        |
| 0 | Q5RL51     | Glutathione S-transferase C-terminal domain-containing protein                               |
| 0 | Q55102     | Biogenesis of lysosome-related organelles complex 1 subunit 1                                |
| 0 | Q9C8A5     | Golgi phosphoprotein 3                                                                       |
| 0 | Q9C8A5     | Telomerase-binding protein EST1A                                                             |
| 0 | Q9WUP7     | Ubiquitin carboxyl-terminal hydrolase isozyme L5                                             |
| 0 | Q6QXN1     | SUZ domain-containing protein 1                                                              |
| 0 | B1AVY7     | Kinesin-like protein KIF168                                                                  |
| 0 | Q9D0F1     | Kinetochore protein NDC80 homolog                                                            |
| 0 | Q8B9F9     | Charged multivesicular body protein 2b                                                       |
| 0 | Q9D0R9     | WD repeat-containing protein 89                                                              |
| 0 | P58064     | 28S ribosomal protein S6, mitochondrial                                                      |
| 0 | Q9D0C0     | 6-phosphogluconate dehydrogenase, decarboxylating                                            |
| 0 | Q9CPQ3     | Mitochondrial import receptor subunit TOM22 homolog                                          |
| 0 | Q8C1M8     | Integrator complex subunit 4                                                                 |
| 0 | Q70A80     | Vesicle-associated membrane protein 4                                                        |
| 0 | Q5EBG6     | Heat shock protein beta-6                                                                    |
| 0 | Q8OUV9     | Transcription initiation factor TFIID subunit 1                                              |
| 0 | Q99LQ1     | MAP3K12-binding inhibitory protein 1                                                         |
| 0 | P97348     | Rho-related GTP-binding protein RhoD                                                         |
| 0 | Q8IZN7     | Mitochondrial Rho GTPase 2                                                                   |
| 0 | Q62446     | Peptidyl-prolyl cis-trans isomerase FKBP3                                                    |
| 0 | Q9D8V4     | Matrix-remodeling-associated protein 8                                                       |
| 0 | Q9C773     | 35S ribosomal protein L44, mitochondrial                                                     |
| 0 | Q9C7P5     | Nuclear protein 16                                                                           |
| 0 | Q9J117     | Synaptophysin-like protein 1                                                                 |
| 0 | Q9JH97     | KDEL motif-containing protein 1                                                              |
| 0 | Q89109     | Intermediate conductance calcium-activated potassium channel protein 4                       |
| 0 | Q9J915     | CKLF-like MARVEL transmembrane domain-containing protein 3                                   |
| 0 | Q90900     | Nuclear receptor coactivator 3                                                               |
| 0 | Q61468     | Mesothelin;Megakaryocyte-potentiating factor;Mesothelin, cleaved form                        |
| 0 | Q8B1W9     | Chromosome transmission fidelity protein 18 homolog                                          |
| 0 | P70245     | 3-beta-hydroxysteroid-Delta(8),Delta(7)-isomerase                                            |
| 0 | Q8BR11     | tRNA wylutidine-synthetizing protein 4                                                       |
| 0 | Q8CFK2     | Transcription factor IIIB 90 kDa subunit                                                     |
| 0 | Q9CQE7     | Endoplasmic reticulum-Golgi intermediate compartment protein 3                               |
| 0 | Q6QNH3     | Vasculin                                                                                     |
| 0 | Q8BHL3     | TBC1 domain family member 108                                                                |
| 0 | Q6Q1C0     | Probable global transcription activator SNF2L2                                               |
| 0 | Q91Y11     | Protein FAM118A                                                                              |
| 0 | P59326     | YTH domain-containing family protein 1                                                       |
| 0 | Q9D8R0     | A-kinase anchor protein 8                                                                    |
| 0 | Q9D4V0     | Ethanolamine kinase 1                                                                        |
| 0 | P70399     | Tumor suppressor p53-binding protein 1                                                       |
| 0 | P49117     | Nuclear receptor subfamily 2 group C member 2                                                |
| 0 | Q3U1RQ     | Testis-expressed sequence 10 protein                                                         |
| 0 | Q8B5P2     | Condensin-2 complex subunit H2                                                               |
| 0 | Q91VL8     | Telomeric repeat-binding factor 2-interacting protein 1                                      |
| 0 | Q8B630     | Golgi SNAP receptor complex member 1                                                         |
| 0 | Q8CH18     | E1A-binding protein p400                                                                     |
| 0 | Q9JIM93    | ADP-ribosylation factor-like protein 6-interacting protein 4                                 |
| 0 | Q8R2T8     | General transcription factor 3C polypeptide 5                                                |
| 0 | Q6P216     | Histone-lysine N-methyltransferase;Histone-lysine N-methyltransferase NSD3                   |
| 0 | Q8C992     | Transcription initiation factor TFIID subunit 5                                              |
| 0 | P97765     | WW domain-binding protein 2                                                                  |
| 0 | Q9C291     | Serum response factor-binding protein 1                                                      |
| 0 | A0A0G2G19  |                                                                                              |
| 0 | Q8K363     | ATP-dependent RNA helicase DDX18                                                             |
| 0 | I7H155     |                                                                                              |
| 0 | Q9ER39     | Torsin-1A                                                                                    |
| 0 | Q3Z4Q4     |                                                                                              |
| 0 | Q3U1M83    | Killer cell lectin-like receptor subfamily G member 2                                        |
| 0 | Q8VY55     | BSD domain-containing protein 1                                                              |
| 0 | Q8C4B4     | Protein unc-119 homolog 8                                                                    |

|                |            |
|----------------|------------|
| Nfib           | mmu:18028  |
| 4931406P16Rik  |            |
| Mob2           | mmu:101513 |
| Pph            | mmu:66101  |
| Armcx2         | mmu:67416  |
| Brp            | mmu:72380  |
| Capn1          | mmu:11333  |
| Ptgrn          | mmu:19221  |
| Ngly1          | mmu:59007  |
| Setx           | mmu:269254 |
| Phos Pisd;Gm20 | mmu:320951 |
| Kpna1          | mmu:16646  |
| Dixdc1         | mmu:330938 |
| Polr3d         | mmu:67065  |
| Setd7          | mmu:73251  |
| Cirbp          | mmu:12696  |
| Gm16286        |            |
| Tmc6c          | mmu:71983  |
| Prepl          | mmu:213760 |
| Rdh12          | mmu:77974  |
| E2f8           | mmu:108961 |
| Nde1           | mmu:67203  |
| Zfyve9         |            |
| Nckip5d        | mmu:80987  |
| Nedd1          | mmu:17997  |
| Ifb1           | mmu:12589  |
| Diph1d1        | mmu:116905 |
| Vldr13         | mmu:73447  |
| Mtx1           |            |
| Ccdc134        | mmu:76457  |
| Rab30          | mmu:72612  |
| Piscr3         | mmu:70310  |
| Zzz3           | mmu:108946 |
| Armc10         | mmu:67211  |
| Atp6v0c        | mmu:11984  |
| Rab30          | mmu:75985  |
| Eiv3           | mmu:27049  |
| Evd2           | mmu:97827  |
| Ccdc117        | mmu:104479 |
| Preb           | mmu:50907  |
| Ak1            | mmu:11636  |
| Ap3s2          | mmu:11778  |
| Polr2g         | mmu:67710  |
| Dicer1         |            |
| Coa7           | mmu:69893  |
| Mhp2           | mmu:52530  |
| Jagrl1         | mmu:67767  |
| Mu2            | mmu:76626  |
| Mett9          | mmu:59052  |
| Fbxw11         | mmu:103583 |
| AK157302;      | mmu:69046  |
| Nsl1           |            |
| Cnot4          | mmu:53621  |
| Nadk           | mmu:192185 |
| Atg16l1        | mmu:77040  |
| Zfyf87         | mmu:78266  |
| Palaf1b2       | mmu:18475  |
| Rtn            | mmu:246102 |
| Bloc13         | mmu:232946 |
| Osbp2          | mmu:228983 |
| Slc20a2        | mmu:20516  |
| Pttg1          | mmu:30939  |
| Zfyve19        | mmu:72008  |
| Gstcd          | mmu:67553  |
| Bloc1s1        | mmu:14533  |
| Golp3          | mmu:66629  |
| Mng6           | mmu:103677 |
| Uchl5          | mmu:56207  |
| Sard1          | mmu:213491 |
| Kif16b         | mmu:16558  |
| Ndc80          | mmu:67052  |
| Chmp2b         | mmu:68942  |
| Vdr89          | mmu:72338  |
| Mrspe6         | mmu:121022 |
| Pgd            | mmu:110208 |
| Tmm22          | mmu:22696  |
| Ints4          | mmu:101861 |
| Vamp4          |            |
| Hspb6          | mmu:243912 |
| Taf1           | mmu:270627 |
| Mbp            | mmu:217588 |
| Rhod           | mmu:11854  |
| Rhot2          | mmu:214952 |
| Fkbp3          | mmu:30795  |
| Mxra8          | mmu:74761  |
| Mrlp44         | mmu:69163  |
| Ntp12b         | mmu:28126  |
| Sypl1          | mmu:19027  |
| Kdel1          | mmu:72050  |
| Cnnr4          | mmu:16534  |
| Cmtm3          | mmu:68119  |
| Ncoa3          |            |
| Msln           | mmu:56047  |
| Chtf18         | mmu:214901 |
| Ebp            | mmu:13595  |
| Lcm2           | mmu:329504 |
| Brl1           |            |
| Ergic3         | mmu:66366  |
| Gbp1           | mmu:73274  |
| Tbc1d10b       | mmu:68449  |
| Smarca2        | mmu:67155  |
| Fam118a        | mmu:73225  |
| Ythdf1         | mmu:228994 |
| Akap8          | mmu:56399  |
| Enk1           | mmu:75320  |
| Trps3bp1;      | mmu:27223  |
| Nc2c2          | mmu:22026  |
| Tex10          | mmu:269536 |
| Ncap2          | mmu:526    |



|      |         |         |         |        |
|------|---------|---------|---------|--------|
| 4526 | 0.3267  | NaN     | NaN     | 0.3267 |
| 4527 | -0.8393 | NaN     | 0.4247  | 0.3274 |
| 4528 | 0.3283  | NaN     | NaN     | 0.3283 |
| 4529 | NaN     | -0.0503 | 0.7187  | 0.3312 |
| 4530 | NaN     | NaN     | -0.6564 | 0.3352 |
| 4531 | 0.3300  | NaN     | NaN     | 0.3360 |
| 4532 | -0.3305 | NaN     | NaN     | 0.3385 |
| 4533 | NaN     | 0.3335  | NaN     | 0.3395 |
| 4534 | NaN     | NaN     | -0.0610 | 0.3402 |
| 4535 | NaN     | 0.5116  | 0.4059  | 0.3433 |
| 4536 | NaN     | NaN     | 0.3459  | 0.3459 |
| 4537 | NaN     | 0.8734  | -1.3981 | 0.3483 |
| 4538 | 0.3501  | NaN     | NaN     | 0.3501 |
| 4539 | 0.3509  | NaN     | NaN     | 0.3502 |
| 4540 | NaN     | 0.3509  | NaN     | 0.3504 |
| 4541 | 0.1236  | NaN     | NaN     | 0.3505 |
| 4542 | 0.3505  | NaN     | NaN     | 0.3505 |
| 4543 | 0.1824  | -0.0824 | NaN     | 0.3508 |
| 4544 | 1.2525  | NaN     | -0.5436 | 0.3515 |
| 4545 | NaN     | 0.3545  | 0.5441  | 0.3529 |
| 4546 | -0.4890 | NaN     | 1.1880  | 0.3545 |
| 4547 | -0.0036 | 0.6511  | NaN     | 0.3554 |
| 4548 | NaN     | NaN     | 1.6948  | 0.3556 |
| 4549 | NaN     | NaN     | 0.3576  | 0.3576 |
| 4550 | NaN     | 0.3376  | 0.3790  | 0.3584 |
| 4551 | NaN     | 0.3285  | -0.1655 | 0.3587 |
| 4552 | NaN     | -0.1242 | 0.8427  | 0.3589 |
| 4553 | NaN     | NaN     | 0.6700  | 0.3594 |
| 4554 | 0.4054  | NaN     | 0.3181  | 0.3616 |
| 4555 | NaN     | 0.2567  | 0.4710  | 0.3639 |
| 4556 | NaN     | 0.5609  | 0.1681  | 0.3645 |
| 4557 | NaN     | NaN     | 0.3645  | 0.3645 |
| 4558 | NaN     | 0.7577  | NaN     | 0.3668 |
| 4559 | NaN     | 0.0968  | NaN     | 0.3677 |
| 4560 | 0.3693  | NaN     | NaN     | 0.3693 |
| 4561 | 0.3700  | NaN     | NaN     | 0.3701 |
| 4562 | 0.3705  | NaN     | NaN     | 0.3705 |
| 4563 | NaN     | NaN     | 0.3709  | 0.3709 |
| 4564 | NaN     | NaN     | NaN     | 0.3725 |
| 4565 | -0.6655 | 1.1666  | NaN     | 0.3737 |
| 4566 | 1.9783  | NaN     | -1.8397 | 0.3787 |
| 4567 | NaN     | 2.5901  | 0.2341  | 0.3796 |
| 4568 | 0.7955  | -0.1010 | NaN     | 0.3804 |
| 4569 | NaN     | 0.6508  | 0.1103  | 0.3805 |
| 4570 | NaN     | NaN     | 0.0038  | 0.3807 |
| 4571 | NaN     | NaN     | 0.3811  | 0.3841 |
| 4572 | NaN     | NaN     | 0.3841  | 0.3841 |
| 4573 | 1.5431  | -0.7760 | NaN     | 0.3836 |
| 4574 | 0.2770  | NaN     | 0.8447  | 0.3842 |
| 4575 | NaN     | 0.9445  | -0.1757 | 0.3845 |
| 4576 | 0.3853  | NaN     | NaN     | 0.3853 |
| 4577 | 0.3875  | NaN     | NaN     | 0.3873 |
| 4578 | 0.1886  | 0.4059  | NaN     | 0.3880 |
| 4579 | NaN     | 0.3776  | 0.5034  | 0.3905 |
| 4580 | 0.9081  | NaN     | NaN     | 0.3928 |
| 4581 | -0.3933 | NaN     | NaN     | 0.3933 |
| 4582 | NaN     | 0.4138  | 0.3937  | 0.3937 |
| 4583 | NaN     | NaN     | 0.3946  | 0.3946 |
| 4584 | 0.1806  | 0.9498  | NaN     | 0.3978 |
| 4585 | NaN     | 0.7853  | NaN     | 0.3981 |
| 4586 | NaN     | 0.5127  | 0.2835  | 0.3981 |
| 4587 | 0.4798  | 0.3300  | NaN     | 0.4053 |
| 4588 | NaN     | 0.3948  | 0.4160  | 0.4054 |
| 4589 | 0.4080  | NaN     | NaN     | 0.4080 |
| 4590 | -0.1961 | NaN     | NaN     | 0.4116 |
| 4591 | NaN     | 1.1719  | -0.3475 | 0.4121 |
| 4592 | NaN     | 0.4138  | 0.4130  | 0.4130 |
| 4593 | 0.4144  | NaN     | NaN     | 0.4146 |
| 4594 | NaN     | 0.8413  | NaN     | 0.4151 |
| 4595 | 0.5553  | 0.8180  | NaN     | 0.4168 |
| 4596 | NaN     | 0.1171  | 0.5977  | 0.4190 |
| 4597 | 0.4203  | NaN     | NaN     | 0.4202 |
| 4598 | 0.8168  | NaN     | NaN     | 0.4241 |
| 4599 | NaN     | 0.4864  | 0.3685  | 0.4264 |
| 4600 | 0.4281  | NaN     | NaN     | 0.4281 |
| 4601 | NaN     | NaN     | -0.4283 | 0.4283 |
| 4602 | NaN     | 0.2674  | -0.4104 | 0.4287 |
| 4603 | NaN     | NaN     | 0.3942  | 0.4291 |
| 4604 | NaN     | 0.6024  | 0.2581  | 0.4293 |
| 4605 | NaN     | NaN     | 0.4299  | 0.4299 |
| 4606 | 0.4302  | NaN     | NaN     | 0.4302 |
| 4607 | NaN     | 0.0948  | 0.7579  | 0.4332 |
| 4608 | 1.4230  | NaN     | 1.5710  | 0.4359 |
| 4609 | NaN     | 0.2918  | 0.5810  | 0.4364 |
| 4610 | -0.7292 | 0.1459  | NaN     | 0.4374 |
| 4611 | NaN     | 0.5249  | 0.3532  | 0.4376 |
| 4612 | NaN     | NaN     | 0.4410  | 0.4410 |
| 4613 | NaN     | NaN     | 0.4436  | 0.4436 |
| 4614 | 1.8916  | NaN     | -0.3372 | 0.4462 |
| 4615 | NaN     | -0.1731 | 1.0547  | 0.4468 |
| 4616 | 0.9974  | NaN     | -0.1036 | 0.4469 |
| 4617 | 0.2510  | NaN     | NaN     | 0.4469 |
| 4618 | NaN     | 0.7143  | 0.1703  | 0.4473 |
| 4619 | 1.1283  | NaN     | NaN     | 0.4497 |
| 4620 | 0.2248  | NaN     | 1.6329  | 0.4517 |
| 4621 | -0.3158 | NaN     | 0.6025  | 0.4533 |
| 4622 | NaN     | 0.3959  | 0.5138  | 0.4559 |
| 4623 | 0.7406  | -0.1719 | NaN     | 0.4563 |
| 4624 | 0.8031  | NaN     | 0.7424  | 0.4572 |
| 4625 | NaN     | 0.4598  | NaN     | 0.4594 |
| 4626 | 0.4631  | NaN     | NaN     | 0.4631 |
| 4627 | 0.5522  | NaN     | 0.3773  | 0.4648 |
| 4628 | 0.4655  | NaN     | NaN     | 0.4655 |
| 4629 | NaN     | 0.3681  | 0.6650  | 0.4656 |
| 4630 | NaN     | NaN     | NaN     | 0.4658 |
| 4631 | NaN     | NaN     | 0.8938  | 0.4663 |
| 4632 | 0.4709  | NaN     | NaN     | 0.4700 |
| 4633 | 0.4707  | NaN     | NaN     | 0.4707 |
| 4634 | 0.4725  | NaN     | NaN     | 0.4725 |
| 4635 | NaN     | 0.4782  | NaN     | 0.4782 |
| 4636 | 0.4003  | 0.4540  | NaN     | 0.4823 |
| 4637 | -0.1432 | NaN     | 1.1172  | 0.4870 |
| 4638 | NaN     | 0.6149  | 0.3614  | 0.4882 |
| 4639 | NaN     | 0.6005  | 0.6855  | 0.4891 |
| 4640 | -1.0677 | -0.0679 | NaN     | 0.4951 |
| 4641 | -0.2254 | NaN     | 0.8731  | 0.4989 |
| 4642 | -0.4994 | NaN     | NaN     | 0.4984 |
| 4643 | NaN     | 0.7606  | -0.3386 | 0.4995 |
| 4644 | NaN     | NaN     | NaN     | 0.5020 |
| 4645 | NaN     | NaN     | 0.5013  | 0.5033 |
| 4646 | -0.0964 | NaN     | 1.8879  | 0.5040 |
| 4647 | 0.5045  | NaN     | NaN     | 0.5045 |
| 4648 | -0.2912 | NaN     | 1.6351  | 0.5073 |
| 4649 | 0.4606  | NaN     | 1.0246  | 0.5085 |
| 4650 | 0.5209  | NaN     | NaN     | 0.5209 |
| 4651 | 0.4044  | NaN     | 0.4209  | 0.5234 |

|   |            |                                                                                  |
|---|------------|----------------------------------------------------------------------------------|
| 0 | Q88G17     | Nucleolar protein 12                                                             |
| 0 | Q3TUUH1    | Phosphatidate cytidylyltransferase, mitochondrial                                |
| 0 | P03930     | ATP synthase protein 8                                                           |
| 0 | P38532     | Heat shock factor protein 1                                                      |
| 0 | Q61205     | Platelet-activating factor acetylhydrolase IB subunit gamma                      |
| 0 | P21460     | Cytosolic RNA 2-thiolation protein 1                                             |
| 0 | Q09110     | Cytoplasmic RNA 2-thiolation protein 1                                           |
| 0 | Q9IKT3     | Taste receptor type 2 member 4                                                   |
| 0 | Q8CHP5     | Partner of Y14 and mago                                                          |
| 0 | Q6P0X2     | Zinc finger protein 511                                                          |
| 0 | Q54714     | E3 SUMO-protein ligase PIAS3                                                     |
| 0 | Q8VG03     | Poly(A)-specific ribonuclease PARN                                               |
| 0 | Q8VB08     | Protein BANP                                                                     |
| 0 | Q88888     | Amyloid beta A4 precursor protein-binding family A member 3                      |
| 0 | Q91K52     | L-xylulose reductase                                                             |
| 0 | P58462     | Forhead box protein P1                                                           |
| 0 | Q9IKX0     | Calpinesin-3                                                                     |
| 0 | Q52KX3     | Protein prune homolog 2                                                          |
| 0 | Q8VE91     | Protein FAM134B                                                                  |
| 0 | P27201     | Guanine nucleotide-binding protein subunit alpha-13                              |
| 0 | P81068     | Iroquois-class homeodomain protein IRX-1                                         |
| 0 | Q62276     | Mediator of RNA polymerase II transcription subunit 22                           |
| 0 | Q61398     | Procollagen C-endopeptidase enhancer 1                                           |
| 0 | Q77528     | Nucleus accumbens-associated protein 1                                           |
| 0 | Q90BC9     | Transcriptional protein SWT1                                                     |
| 0 | Q9P94      | Solute carrier family 23 member 2                                                |
| 0 | Q902V8     | Major facilitator superfamily domain-containing protein 10                       |
| 0 | Q8MVA2     | Transmembrane protein 222                                                        |
| 0 | Q50143     | Ubiquitin carboxyl-terminal hydrolase 28                                         |
| 0 | Q80V94     | AP-4 complex subunit epsilon-1                                                   |
| 0 | Q8VCG9     | Regulatory factor X-associated protein                                           |
| 0 | Q8CA72     | Gigaxonin                                                                        |
| 0 | Q62QI3     | Malectin                                                                         |
| 0 | E9Q682     |                                                                                  |
| 0 | A1AS56     | TBC1 domain family member 25                                                     |
| 0 | Q88H48     | Ubiquitin-associated protein 1                                                   |
| 0 | Q6P1H6     | Ankyrin repeat and LEM domain-containing protein 2                               |
| 0 | Q9CX66     | Uncharacterized protein C12orf45 homolog                                         |
| 0 | Q8R4X3     | RNA-binding protein 12                                                           |
| 0 | Q9JL62     | Glycolipid transfer protein                                                      |
| 0 | Q505F1     | Nuclear receptor subfamily 2 group C member 1                                    |
| 0 | P97930     | Thymidylate kinase                                                               |
| 0 | Q692C8     | GPLAPP motifs-containing protein 1                                               |
| 0 | Q3TQD1     | Dolichyl-diphosphooligosaccharide--protein glycosyltransferase subunit STT3B     |
| 0 | Q9C4G3     |                                                                                  |
| 0 | E9QAL5     | Serine hydroxymethyltransferase;Serine hydroxymethyltransferase, cytosolic       |
| 0 | P50431     | Methionine synthase                                                              |
| 0 | F7A127     | Leucine-rich repeat-containing protein 16A                                       |
| 0 | A0A140LW13 |                                                                                  |
| 0 | A2R5Y1     | KAT8 regulatory NSL complex subunit 3                                            |
| 0 | Q77PD1     | F-box only protein 11                                                            |
| 0 | Q9IKY0     | Cell differentiation protein RCD1 homolog                                        |
| 0 | Q9ZD6E     | Interferon-induced guanylate-binding protein 2                                   |
| 0 | Q9JIF3     | Bifunctional lysine-specific demethylase and histidyl-hydroxylase NO66           |
| 0 | Q9J216     | Kruppel-like factor 13                                                           |
| 0 | Q3T5G4     | RNA demethylase ALKBH5                                                           |
| 0 | Q91270     | DnaI homolog subfamily C member 24                                               |
| 0 | Q64127     | Transcription intermediary factor 1-alpha                                        |
| 0 | Q8CGY8     | UDP-N-acetylglucosamine--peptide N-acetylglucosaminyltransferase 110 kDa subunit |
| 0 | Q4P1X1     | Protein odr-4 homolog                                                            |
| 0 | P25119     | Tumor necrosis factor receptor superfamily member 1B                             |
| 0 | P70295     | Ancient ubiquitous protein 1                                                     |
| 0 | Q99K11     | Receptor expression-enhancing protein 3                                          |
| 0 | Q9Z204     | Heterogeneous nuclear ribonucleoproteins C1/C2                                   |
| 0 | Q51571     | Probable palmitoyltransferase ZDHHC20                                            |
| 0 | P97473     | RISC-loading complex subunit TARBP2                                              |
| 0 | Q3U218     | Little elongation complex subunit 2                                              |
| 0 | Q99156     | Derlin-1                                                                         |
| 0 | Q6P1G0     | HEAT repeat-containing protein 6                                                 |
| 0 | Q88879     | Apoptotic protease-activating factor 1                                           |
| 0 | Q9CYX7     | RRP15-like protein                                                               |
| 0 | Q923Q2     | STAR-related lipid transfer protein 13                                           |
| 0 | Q9CQL1     | Protein mago nashi homolog 2                                                     |
| 0 | Q88H07     | ADP-ribosylation factor-like protein 6-interacting protein 6                     |
| 0 | Q926A8     | Rab GTPase-activating protein 1-like                                             |
| 0 | Q3TWW2     | Type 1 phosphatidylinositol 4,5-bisphosphate 4-phosphatase                       |
| 0 | Q3V011     | Transmembrane protein 237                                                        |
| 0 | P97823     | Acyl-protein thioesterase 1                                                      |
| 0 | E9Q8V6     |                                                                                  |
| 0 | E9Q5G3     | Kinesin-like protein KIF23                                                       |
| 0 | Q9JHR7     | Insulin-degrading enzyme                                                         |
| 0 | E9Q2I4     |                                                                                  |
| 0 | Q08599     | Syntaxin-binding protein 1                                                       |
| 0 | Q3Y155     |                                                                                  |
| 0 | P83382     | 60S ribosomal protein L36a                                                       |
| 0 | Q9DCE5     | p21-activated protein kinase-interacting protein 1                               |
| 0 | Q8M9H3     | MAPK-interacting and spindle-stabilizing protein-like                            |
| 0 | Q661V4     | RNA-binding protein 128-B;RNA-binding protein 128-A                              |
| 0 | Q9JIK4     | NADH dehydrogenase [ubiquinone] 1 alpha subcomplex assembly factor 3             |
| 0 | Q8VEK0     | Cell cycle control protein 50A                                                   |
| 0 | P52480     | Pyruvate kinase PKM                                                              |
| 0 | Q9CWR2     | Histone-lysine N-methyltransferase SMYD3                                         |
| 0 | P41778     | Pre-B-cell leukemia transcription factor 1                                       |
| 0 | P52927     | High mobility group protein HMGI-C                                               |
| 0 | Q9G0L2     | Ganglioside-induced differentiation-associated protein 2                         |
| 0 | Q90J56     | Late secretory pathway protein AV19 homolog                                      |
| 0 | A2A690     | Protein TANC2                                                                    |
| 0 | Q9DB21     | Inhibitor of nuclear factor kappa-B kinase-interacting protein                   |
| 0 | Q88H47     | Vesicle-trafficking protein SEC22a                                               |
| 0 | Q60954     | Homeobox protein Meis3;Homeobox protein Meis1;Homeobox protein Meis2             |
| 0 | Q8VDG5     | Phosphopantothenate--cysteine ligase                                             |
| 0 | Q9CQPO     | 39S ribosomal protein L33, mitochondrial                                         |
| 0 | P32570     | Nectin-2                                                                         |
| 0 | Q6PFF0     |                                                                                  |
| 0 | Q99P94     | Anaphase-promoting complex subunit CDC26                                         |
| 0 | Q8C263     | Spindle and kinetochore-associated protein 3                                     |
| 0 | F8VPO2     |                                                                                  |
| 0 | A0A0G2JH12 |                                                                                  |
| 0 | Q8N7N6     |                                                                                  |
| 0 | Q9D855     | Cytochrome b-c1 complex subunit 7                                                |
| 0 | Q8R5K2     | Ubiquitin carboxyl-terminal hydrolase 33                                         |
| 0 | Q99PQ2     | E3 ubiquitin-protein ligase TRIM11                                               |
| 0 | Q99JW4     | LIM and senescent cell antigen-like-containing domain protein 1                  |
| 0 | Q88Q03     | Cytochrome c oxidase assembly protein COX15 homolog                              |
| 0 | Q95BC3     | Echinoderm microtubule-associated protein-like 1                                 |
| 0 | P59113     | Fermitin family homolog 1                                                        |
| 0 | Q9D6V8     | Polyadenylate-binding protein-interacting protein 2                              |
| 0 | Q6P6G6     | Guanine nucleotide-binding protein-like 3-like protein                           |
| 0 | Q8CIA9     | Hippocampus abundant transcript-like protein 1                                   |
| 0 | Q80U58     | Pumilio homolog 2                                                                |
| 0 | Q5RH66     | Protein SMG7                                                                     |
| 0 | Q61037     | Tuberin                                                                          |
| 0 | P70288     | Histone deacetylase 2                                                            |
| 0 | Q70230     | Zinc finger protein 143                                                          |
| 0 | Q8R349     | Cell division cycle protein 16 homolog                                           |

|          |            |
|----------|------------|
| Nol12    | mmu:97961  |
| Tamm41   |            |
| Mlatp8   | mmu:17706  |
| Hsf1     | mmu:15499  |
| Pafah1b3 | mmu:18476  |
| Ct33     | mmu:13016  |
| Ct11     | mmu:23189  |
| Tazr4    | mmu:57255  |
| Wlbq     | mmu:78428  |
| Znf511   | mmu:69752  |
| Pias3    | mmu:229615 |
| Parn     | mmu:74108  |
| Banp     | mmu:53325  |
| Apba3    | mmu:57267  |
| Docr     | mmu:67880  |
| Foxp1    | mmu:108655 |
| Ran3     | mmu:53902  |
| Prune2   | mmu:353211 |
| Fam134b  | mmu:66270  |
| Gna13    | mmu:14674  |
| Irx1     | mmu:16371  |
| Med22    | mmu:20933  |
| Pcolce   | mmu:18542  |
| Nacc1    | mmu:66830  |
| Sw11     | mmu:66875  |
| Slc22a2  | mmu:54338  |
| Mfsd10   | mmu:68294  |
| Tmem222  | mmu:52174  |
| Usp28    | mmu:235323 |
| Ap4e1    | mmu:108011 |
| Rfxap    | mmu:170767 |
| Gan      | mmu:209239 |
| Mlec     | mmu:109154 |
| Irf140   |            |
| Tbc1d25  | mmu:209815 |
| Ubpap1   | mmu:67123  |
| Ankrd2   | mmu:71782  |
| D10Wsu10 | mmu:28109  |
| Gm28036j | mmu:75710  |
| Gltp     | mmu:56356  |
| Nr2c1    | mmu:22025  |
| Dtymk    | mmu:21915  |
| Gpalp1   | mmu:67467  |
| Stt3b    | mmu:68292  |
| Dut      | mmu:110074 |
| Cald1    |            |
| Shmt1    | mmu:20425  |
| Ntr      | mmu:238505 |
| Lrrc16a  |            |
| Frmppd3  | mmu:245643 |
| Kansl3   | mmu:226976 |
| Fbxo11   | mmu:225055 |
| Rgcd1    | mmu:58184  |
| Gbp2     | mmu:14469  |
| N066     | mmu:71952  |
| KIF13    | mmu:50794  |
| Alkbh5   | mmu:268420 |
| Dnajc24  | mmu:99349  |
| Trim24   |            |

|      |         |         |         |        |
|------|---------|---------|---------|--------|
| 4652 | 0.5236  | NaN     | NaN     | 0.5236 |
| 4653 | NaN     | NaN     | 0.5277  | 0.5277 |
| 4654 | NaN     | 1.1855  | -0.1269 | 0.5295 |
| 4655 | NaN     | 0.3633  | 0.6900  | 0.5297 |
| 4656 | NaN     | 0.9293  | 0.3480  | 0.5392 |
| 4657 | 0.7289  | NaN     | NaN     | 0.5396 |
| 4658 | NaN     | 1.4759  | -0.1059 | 0.5396 |
| 4659 | NaN     | 1.6619  | -0.7528 | 0.5413 |
| 4660 | 0.4722  | NaN     | 0.6120  | 0.5421 |
| 4661 | NaN     | 1.0037  | 0.0870  | 0.5453 |
| 4662 | 0.5455  | NaN     | NaN     | 0.5458 |
| 4663 | 1.0181  | NaN     | NaN     | 0.5470 |
| 4664 | 0.8767  | 0.2188  | NaN     | 0.5475 |
| 4665 | 0.5485  | NaN     | 0.9043  | 0.5483 |
| 4666 | 0.5485  | NaN     | NaN     | 0.5485 |
| 4667 | 0.5265  | NaN     | 0.3514  | 0.5536 |
| 4668 | NaN     | NaN     | NaN     | 0.5531 |
| 4669 | 0.1470  | 0.9517  | NaN     | 0.5544 |
| 4670 | 0.7323  | 1.3982  | NaN     | 0.5550 |
| 4671 | NaN     | NaN     | 0.5579  | 0.5579 |
| 4672 | NaN     | 0.5580  | NaN     | 0.5590 |
| 4673 | 0.7265  | NaN     | 0.3547  | 0.5606 |
| 4674 | 0.8229  | NaN     | NaN     | 0.5647 |
| 4675 | 0.5604  | NaN     | NaN     | 0.5664 |
| 4676 | 0.5704  | NaN     | NaN     | 0.5704 |
| 4677 | 0.5746  | NaN     | NaN     | 0.5746 |
| 4678 | 1.8435  | NaN     | 0.7630  | 0.5773 |
| 4679 | 1.0596  | NaN     | NaN     | 0.5810 |
| 4680 | 0.5813  | NaN     | NaN     | 0.5813 |
| 4681 | 0.5823  | NaN     | NaN     | 0.5823 |
| 4682 | 0.5823  | NaN     | NaN     | 0.5823 |
| 4683 | NaN     | 0.5714  | 0.6002  | 0.5858 |
| 4684 | NaN     | 0.5875  | NaN     | 0.5873 |
| 4685 | 1.2291  | 0.7990  | NaN     | 0.5909 |
| 4686 | -0.1891 | NaN     | NaN     | 0.5995 |
| 4687 | 0.5976  | NaN     | NaN     | 0.5976 |
| 4688 | 0.6005  | NaN     | NaN     | 0.6005 |
| 4689 | 0.6018  | NaN     | NaN     | 0.6018 |
| 4690 | NaN     | NaN     | NaN     | 0.6036 |
| 4691 | 0.6040  | NaN     | NaN     | 0.6044 |
| 4692 | NaN     | 0.9489  | 0.2651  | 0.6070 |
| 4693 | 0.6081  | NaN     | NaN     | 0.6081 |
| 4694 | NaN     | -0.8164 | 2.0361  | 0.6097 |
| 4695 | 0.6117  | NaN     | NaN     | 0.6117 |
| 4696 | 0.4959  | NaN     | 0.5481  | 0.6118 |
| 4697 | NaN     | -1.1095 | 2.0838  | 0.6149 |
| 4698 | NaN     | 1.1905  | 0.1738  | 0.6171 |
| 4699 | NaN     | 0.6642  | 0.5713  | 0.6176 |
| 4700 | NaN     | 0.6201  | NaN     | 0.6201 |
| 4701 | -0.3922 | NaN     | 0.6405  | 0.6223 |
| 4702 | 0.6241  | NaN     | NaN     | 0.6241 |
| 4703 | 1.3148  | NaN     | NaN     | 0.6257 |
| 4704 | 0.8441  | NaN     | 0.4121  | 0.6281 |
| 4705 | 0.6394  | NaN     | NaN     | 0.6354 |
| 4706 | NaN     | NaN     | NaN     | 0.6435 |
| 4707 | NaN     | 1.2356  | 0.6480  | 0.6480 |
| 4708 | NaN     | 0.1569  | NaN     | 0.6485 |
| 4709 | NaN     | -0.1090 | 0.6654  | 0.6517 |
| 4710 | 0.6522  | NaN     | NaN     | 0.6522 |
| 4711 | 0.6522  | NaN     | NaN     | 0.6522 |
| 4712 | NaN     | 0.5755  | 0.7302  | 0.6528 |
| 4713 | NaN     | NaN     | 0.6555  | 0.6555 |
| 4714 | 0.6587  | NaN     | NaN     | 0.6587 |
| 4715 | NaN     | 0.8009  | 0.6668  | 0.6668 |
| 4716 | 0.6709  | NaN     | NaN     | 0.6707 |
| 4717 | NaN     | 0.9237  | 0.4288  | 0.6737 |
| 4718 | 0.6758  | NaN     | NaN     | 0.6781 |
| 4719 | 0.6800  | NaN     | NaN     | 0.6800 |
| 4720 | 0.6800  | NaN     | NaN     | 0.6805 |
| 4721 | 0.9618  | NaN     | NaN     | 0.6835 |
| 4722 | NaN     | 1.1374  | 0.2414  | 0.6894 |
| 4723 | NaN     | 0.6903  | NaN     | 0.6903 |
| 4724 | NaN     | NaN     | 0.6902  | 0.6902 |
| 4725 | 0.3089  | NaN     | NaN     | 0.6903 |
| 4726 | NaN     | 0.7028  | 0.6870  | 0.6944 |
| 4727 | NaN     | 0.6988  | 0.6968  | 0.6968 |
| 4728 | -0.6939 | NaN     | NaN     | 0.6979 |
| 4729 | -0.0705 | 1.4775  | NaN     | 0.6988 |
| 4730 | NaN     | 0.4330  | 0.9913  | 0.7121 |
| 4731 | 2.2610  | -0.4289 | NaN     | 0.7139 |
| 4732 | NaN     | NaN     | 0.7209  | 0.7209 |
| 4733 | 0.1083  | NaN     | 1.3423  | 0.7253 |
| 4734 | 0.7296  | 0.7219  | NaN     | 0.7254 |
| 4735 | 0.5621  | NaN     | 1.2594  | 0.7338 |
| 4736 | NaN     | NaN     | NaN     | 0.7344 |
| 4737 | NaN     | NaN     | 0.7495  | 0.7495 |
| 4738 | NaN     | 0.4653  | NaN     | 0.7497 |
| 4739 | -0.1005 | NaN     | NaN     | 0.7519 |
| 4740 | NaN     | 0.6414  | 0.9083  | 0.7669 |
| 4741 | 0.8863  | NaN     | 0.3747  | 0.7675 |
| 4742 | NaN     | NaN     | NaN     | 0.7697 |
| 4743 | -0.1532 | NaN     | NaN     | 0.7714 |
| 4744 | 0.7737  | NaN     | NaN     | 0.7737 |
| 4745 | -0.1963 | NaN     | NaN     | 0.7744 |
| 4746 | NaN     | -0.1047 | 1.6181  | 0.7750 |
| 4747 | 0.7810  | NaN     | NaN     | 0.7840 |
| 4748 | 2.9717  | NaN     | 0.3264  | 0.7852 |
| 4749 | 0.7237  | 0.3768  | NaN     | 0.7846 |
| 4750 | NaN     | NaN     | 0.7840  | 0.7849 |
| 4751 | 1.1162  | 0.4578  | NaN     | 0.7870 |
| 4752 | 0.7884  | NaN     | NaN     | 0.7884 |
| 4753 | 0.7892  | NaN     | NaN     | 0.7892 |
| 4754 | NaN     | NaN     | -0.8960 | 0.7912 |
| 4755 | 1.2894  | NaN     | NaN     | 0.7937 |
| 4756 | 0.8001  | NaN     | NaN     | 0.8001 |
| 4757 | -0.6518 | NaN     | NaN     | 0.8024 |
| 4758 | NaN     | 0.3154  | 0.2749  | 0.8051 |
| 4759 | 0.8114  | NaN     | NaN     | 0.8119 |
| 4760 | 0.8120  | NaN     | NaN     | 0.8120 |
| 4761 | 0.5084  | NaN     | 0.2214  | 0.8149 |
| 4762 | 1.4873  | NaN     | NaN     | 0.8204 |
| 4763 | 0.8236  | NaN     | NaN     | 0.8236 |
| 4764 | 1.7189  | NaN     | NaN     | 0.8285 |
| 4765 | NaN     | NaN     | NaN     | 0.8333 |
| 4766 | 0.8342  | NaN     | NaN     | 0.8342 |
| 4767 | 0.8326  | NaN     | NaN     | 0.8376 |
| 4768 | -0.9139 | NaN     | NaN     | 0.8378 |
| 4769 | -0.8409 | NaN     | NaN     | 0.8403 |
| 4770 | NaN     | 0.8411  | NaN     | 0.8411 |
| 4771 | -0.5265 | NaN     | NaN     | 0.8446 |
| 4772 | 0.8487  | NaN     | NaN     | 0.8487 |
| 4773 | 0.8526  | 0.8489  | NaN     | 0.8497 |
| 4774 | 0.8597  | NaN     | NaN     | 0.8557 |
| 4775 | NaN     | 0.3629  | NaN     | 0.8566 |
| 4776 | 2.1836  | NaN     | -0.3382 | 0.8573 |
| 4777 | 1.3806  | NaN     | 0.8362  | 0.8594 |

|   |           |                                                                                                                   |             |            |
|---|-----------|-------------------------------------------------------------------------------------------------------------------|-------------|------------|
| 0 | Q8C569    | Protein FAM1188                                                                                                   | Fam118b     | mmu:109229 |
| 0 | Q5S516    | U3 small nuclear RNA-associated protein 18 homolog                                                                | Utp18       | mmu:217109 |
| 0 | Q9DA69    | Intraflagellar transport protein 43 homolog                                                                       | Ifit43      | mmu:76411  |
| 0 | P98195    | Phospholipid-transporting ATPase;Probable phospholipid-transporting ATPase IIB                                    | Atg9b       | mmu:50771  |
| 0 | P53612    | Geranylgeranyl transferase type-2 subunit beta                                                                    | Rabggtb     | mmu:19352  |
| 0 | Q88379    | Bromodomain adjacent to zinc finger domain protein 1A                                                             | Baz1a       |            |
| 0 | Q9PEK2    | Protein XBP2                                                                                                      | Rp2         | mmu:19889  |
| 0 | Q92125    | Tumor necrosis factor alpha-induced protein 8                                                                     | Tnfaiip8    | mmu:106869 |
| 0 | Q62440    | Transducin-like enhancer protein 1                                                                                | Tle1        | mmu:21885  |
| 0 | Q8BH31    | Major facilitator superfamily domain-containing protein 8                                                         | Mfsd8       | mmu:72175  |
| 0 | Q9P914    | Phosphatidate phosphatase LPIN3                                                                                   | Lpin3       | mmu:64899  |
| 0 | Q8CC0C    | Zinc fingers and homeobox protein 2                                                                               | Zhx2        | mmu:387609 |
| 0 | Q61818    | Retinoic acid-induced protein 1                                                                                   | Rai1        | mmu:19377  |
| 0 | Q61072    | Disintegrin and metalloproteinase domain-containing protein 9                                                     | Adam9       | mmu:11502  |
| 0 | Q8VEK6    | Inhibitor of growth protein;inhibitor of growth protein 3                                                         | Ing3        | mmu:71777  |
| 0 | Q692X6    | Probable JmJc domain-containing histone demethylation protein 2C                                                  | Jmjd1c      | mmu:108829 |
| 0 | Q8C145    | Zinc transporter ZIP6                                                                                             | Slc39a6     | mmu:106957 |
| 0 | Q9CWS1    | E3 ubiquitin-protein ligase RNF135                                                                                | Rnf135      | mmu:71956  |
| 0 | P11675    | Carboxypeptidase;Lysosomal protective protein;Lysosomal protective protein 32 kDa chain;Lysoso                    | Ctsa        | mmu:19025  |
| 0 | Q80893    | Calponin-2;Calponin                                                                                               | Cnn2        | mmu:12798  |
| 0 | Q80Z60-3  |                                                                                                                   |             |            |
| 0 | Q69288    | Zinc finger CCHC domain-containing protein 2                                                                      | Zcchc2      | mmu:227449 |
| 0 | Q91K83    | Y-box-binding protein 3                                                                                           | Ybx3        | mmu:56449  |
| 0 | Q52KR2    | Leucine-rich repeats and immunoglobulin-like domains protein 2;Leucine-rich repeats and immun                     | Lrig2;Lrig3 | mmu:269473 |
| 0 | Q9C5C2    | H/ACA ribonucleoprotein complex subunit 3                                                                         | Nop10       | mmu:66181  |
| 0 | Q31V93    |                                                                                                                   | Ap1s2       |            |
| 0 | Q9C572    | Chromatin target of PRMT1 protein                                                                                 | Cttop       | mmu:66511  |
| 0 | Q88874    | Cyclin-K                                                                                                          | Ccnk        |            |
| 0 | Q4V8F2    | R3H domain-containing protein 4                                                                                   | R3hdm4      | mmu:109284 |
| 0 | Q08736    | Caspase;Caspase-12                                                                                                | Casp12      | mmu:12364  |
| 0 | Q8BV66    | RING finger and SPRY domain-containing protein 1                                                                  | Rspry1      | mmu:67610  |
| 0 | Q55023    | Inositol monophosphatase 1                                                                                        | Impa1       |            |
| 0 | Q9CPW9    | Methionine aminopeptidase 10, mitochondrial                                                                       | Metap1d     | mmu:66559  |
| 0 | Q88974    | Histone-lysine N-methyltransferase SETDB1                                                                         | Setdb1      |            |
| 0 | P7FAC9    |                                                                                                                   | Macf1       |            |
| 0 | Q8C771    | Coiled-coil domain-containing protein 132                                                                         | Ccdc132     | mmu:73288  |
| 0 | Q9P911    | Hsp70-binding protein 1                                                                                           | Hspbp1      | mmu:66245  |
| 0 | Q88845    | A-kinase anchor protein 10, mitochondrial                                                                         | Akap10      | mmu:56697  |
| 0 | P49442    | Inositol polyphosphate 1-phosphatase                                                                              | Inpp1       | mmu:16329  |
| 0 | Q326G3    |                                                                                                                   | Mapre3      |            |
| 0 | Q7TMF3    | NADH dehydrogenase [ubiquinone] 1 alpha subcomplex subunit 12                                                     | Ndufa12     | mmu:66414  |
| 0 | Q9CWW7    | CXXC-type zinc finger protein 1                                                                                   | Cxxc1       | mmu:74322  |
| 0 | Q5SW75    | Protein phosphatase Slingshot homolog 2                                                                           | Sh2         | mmu:237860 |
| 0 | 81AR11    |                                                                                                                   | Vps13d      |            |
| 0 | Q686D3    | Non-canonical poly(A) RNA polymerase PAPD5                                                                        | Papd5       | mmu:214627 |
| 0 | Q8BH90    | Protein phosphatase 1L                                                                                            | Ppm1l       | mmu:242083 |
| 0 | Q3UDW8    | Heparan-alpha-glucosaminide N-acetyltransferase                                                                   | Hgsnat      | mmu:52120  |
| 0 | Q8VE62    | Polyadenylate-binding protein-interacting protein 1                                                               | Paiip1      | mmu:218693 |
| 0 | A6BLV7    | Keratin, type I cytoskeletal 28                                                                                   | Krt28       | mmu:70843  |
| 0 | P56695    | Wolfram                                                                                                           | Wfs1        | mmu:22393  |
| 0 | Q6P3Y5    | Zinc finger protein 280C                                                                                          | Znf280c     | mmu:208968 |
| 0 | Q09053    | Werner syndrome ATP-dependent helicase homolog                                                                    | Wrrn        | mmu:22427  |
| 0 | Q62280    | Protein SSKT                                                                                                      | Ss18        | mmu:268996 |
| 0 | Q5SV77    | Gametogenetin-binding protein 2                                                                                   | Gnbp2       | mmu:217039 |
| 0 | A0A09YU44 |                                                                                                                   |             |            |
| 0 | P97320    | Neuroplastin                                                                                                      | Nptn        | mmu:20320  |
| 0 | Q61738    | Integrin alpha-7;Integrin alpha-7 heavy chain;Integrin alpha-7 light chain                                        | Itga7       |            |
| 0 | Q91178    | CSG1-like protein 1                                                                                               | Tmem63a     | mmu:208795 |
| 0 | Q3U3N6    | AP-4 complex accessory subunit tepsin                                                                             | Enthd2      | mmu:78777  |
| 0 | Q8R184    | Protein FAM110A                                                                                                   | Fam110a     | mmu:73847  |
| 0 | Q80XU3    | Nuclear ubiquitously casein and cyclin-dependent kinase substrate 1                                               | Nucks1      | mmu:98415  |
| 0 | Q5NBX1    | Protein cordon-bleu                                                                                               | Cobl        | mmu:12808  |
| 0 | Q8VOY9    | Caspase activity and apoptosis inhibitor 1                                                                        | Caap1       | mmu:67770  |
| 0 | Q9D0K2    | Succinyl-CoA:3-ketoacid coenzyme A transferase 1, mitochondrial                                                   | Oxct1       | mmu:67041  |
| 0 | Q880W65   | Volume-regulated anion channel subunit LRRC8A                                                                     | Lrrc8a      | mmu:241296 |
| 0 | P23283    | GTase KRas;GTPase KRas, N-terminally processed                                                                    | Kras        | mmu:16653  |
| 0 | Q3U254    | OTU domain-containing protein 5                                                                                   | Otd5        | mmu:54644  |
| 0 | D6R442    |                                                                                                                   | Zc3h7a      |            |
| 0 | Q55GK3    | Aldehyde oxidase 2                                                                                                | Aox2        | mmu:213043 |
| 0 | Q9D215    | Lish domain-containing protein ARMC9                                                                              | Armc9       | mmu:78795  |
| 0 | Q8I2X9    | Hydroxymethylglutaryl-CoA synthase, cytoplasmic                                                                   | Hmgcs1      | mmu:208715 |
| 0 | Q8C119    | Protein-methionine sulfoxide oxidase MICAL3                                                                       | Mical3      | mmu:194401 |
| 0 | P15066    | Transcription factor jun-D                                                                                        | Jund        | mmu:16478  |
| 0 | Q8CIG0    | Protein argonaute-2                                                                                               | Ago2        | mmu:239528 |
| 0 | Q88342    | WD repeat-containing protein 1                                                                                    | Vdr1        | mmu:22388  |
| 0 | A24641    | G patch domain-containing protein 8                                                                               | Gpatch8     | mmu:237943 |
| 0 | Q80ZM8    | Cardiolipin synthase (CMP-forming)                                                                                | Crls1       | mmu:66586  |
| 0 | Q61188    | Histone-lysine N-methyltransferase EZH2                                                                           | Ezh2        | mmu:14056  |
| 0 | Q9OY76    | Vesicle-associated membrane protein-associated protein B                                                          | Vapb        |            |
| 0 | Q9CWW4    | Gem-associated protein 7                                                                                          | Gemin7      | mmu:69731  |
| 0 | Q91X87    | Protein YIF1A                                                                                                     | Yif1a       | mmu:68090  |
| 0 | A2A9C3    | Protein SZT2                                                                                                      | Szt2        | mmu:230676 |
| 0 | Q9D6K5    | Synaptotagmin-2-binding protein                                                                                   | Syn2bpb;G   | mmu:24071  |
| 0 | Q62511    | E3 ubiquitin-protein ligase ZFP91                                                                                 | Zfp91       | mmu:109910 |
| 0 | Q92201    | Myotubularin-related protein 2                                                                                    | Mtmr2       | mmu:77116  |
| 0 | Q09199    | Beta-1,4 N-acetylgalactosaminyl transferase 2                                                                     | B4galnt2    | mmu:14422  |
| 0 | Q742N5    | Adenosine 3-phospho 5-phosphosulfate transporter 1                                                                | Slc35b2     |            |
| 0 | Q80YQ2    | Mediator of RNA polymerase II transcription subunit 23                                                            | Med23       | mmu:70208  |
| 0 | P97465    | Docking protein 1                                                                                                 | Dok1        | mmu:13448  |
| 0 | E9Q784    |                                                                                                                   | Zc3h13      | mmu:67302  |
| 0 | Q7T718    | Activating transcription factor 7-interacting protein 1                                                           | Atf7ip      | mmu:54343  |
| 0 | Q8K072    | Receptor expression-enhancing protein 4                                                                           | Reep4       | mmu:72549  |
| 0 | Q9CXL2    | Kinesin-like protein;Kinesin-like protein KIF21A;Kinesin-like protein KIF7;Kinesin-like protein KIF27;Kif21a;Kif7 | mmu:16564   |            |
| 0 | Q9P9M3    | Transcription initiation factor IIA subunit 1;Transcription initiation factor IIA alpha chain;Transcrip           | Gtf2a1      | mmu:83602  |
| 0 | Q9JMH6    | Thioredoxin reductase 1, cytoplasmic                                                                              | Txnrd1      | mmu:50493  |
| 0 | Q5UAC3    | Splicing factor, arginine/serine-rich 19                                                                          | Scaf1       | mmu:233208 |
| 0 | Q64512    | Tyrosine-protein phosphatase non-receptor type 13                                                                 | Ptpn13      | mmu:19349  |
| 0 | Q9J9H1    | Ribonuclease P protein subunit p25-like protein                                                                   | Rpp25       | mmu:69961  |
| 0 | B7ZMP1    | Probable Xaa-Pro aminopeptidase 3                                                                                 | Xpnpep3     | mmu:321003 |
| 0 | Q5I816    | Zinc transporter 9                                                                                                | Slc30a9     | mmu:109108 |
| 0 | Q88P28    | BRCA1-A complex subunit Abraxas                                                                                   | Fam175a     | mmu:70681  |
| 0 | Q9J199    | HIG1 domain family member 1A, mitochondrial                                                                       | Higd1a      | mmu:56295  |
| 0 | Q8R404    | Protein QIL1                                                                                                      | Qil1        | mmu:224904 |
| 0 | Q925V9    | Mediator of RNA polymerase II transcription subunit 1                                                             | Med1        | mmu:19014  |
| 0 | Q92477    | E3 ubiquitin-protein ligase RNF31                                                                                 | Rnf31       | mmu:268749 |
| 0 | Q08856    | RNA polymerase II elongation factor ELL                                                                           | Ell         | mmu:13716  |
| 0 | Q9R153    | GPI ethanolamine phosphate transferase 1                                                                          | Pign        |            |
| 0 | Q9DCM7    | Nucleus accumbens-associated protein 2                                                                            | Nacc2       | mmu:67991  |
| 0 | Q8K1N1    | Calcium-independent phospholipase A2-gamma                                                                        | Pnpla8      | mmu:67452  |
| 0 | Q61712    | Ona1 homolog subfamily C member 1                                                                                 | Dnaic1      | mmu:13418  |
| 0 | Q8K389    | CDK5 regulatory subunit-associated protein 2                                                                      | Cdk5rap2    | mmu:214444 |
| 0 | Q9D4H9    | PHO finger protein 14                                                                                             | Phf14       | mmu:75725  |
| 0 | Q88327    | Alpha-catulin                                                                                                     | Ctnnal1     | mmu:54366  |
| 0 | Q99N84    | 28S ribosomal protein S18b, mitochondrial                                                                         | Mrps18b     | mmu:66973  |
| 0 | Q80U87    | Ubiquitin carboxyl-terminal hydrolase;Ubiquitin carboxyl-terminal hydrolase 8                                     | Usp8        | mmu:84092  |
| 0 | Q88X08    | Protein FAM53C                                                                                                    | Fam53c      | mmu:66306  |
| 0 | Q90BE8    | Alpha-1,3/1,6-mannosyltransferase ALG2                                                                            | Alg2        | mmu:56737  |
| 0 | Q9R1C0    | Transcription initiation factor TFIID subunit 7                                                                   | Taf7        | mmu:24074  |
| 0 | Q37FQ1    | SPRY domain-containing protein 7                                                                                  | Spryd7      | mmu:66674  |
| 0 | Q88700    | Bloom syndrome protein homolog                                                                                    | Blm         | mmu:12144  |
| 0 | Q9JIM5    | AP-3 complex subunit beta-2                                                                                       | Ap3b2       | mmu:11775  |
| 0 | P20826    | Ka ligand;Soluble KIT ligand                                                                                      | Kitlg       | mmu:17311  |
| 0 | Q9D4C5    | ELL-associated factor 1                                                                                           | Eaf1        | mmu:74427  |
| 0 | P13011    | Acyl-CoA desaturase 2                                                                                             | Scd2        | mmu:20250  |
| 0 | Q7FV05    |                                                                                                                   | Ahnak2      |            |
| 0 | B2RR83    | Probable ATP-dependent RNA helicase YTHDC2                                                                        | Ythdc2      | mmu:240255 |

|      |        |        |        |        |
|------|--------|--------|--------|--------|
| 4778 | NaN    | 0.7648 | 0.9558 | 0.8603 |
| 4779 | NaN    | 2.4744 | 0.5845 | 0.8604 |
| 4780 | NaN    | 1.3288 | NaN    | 0.8629 |
| 4781 | NaN    | NaN    | 0.8648 | 0.8649 |
| 4782 | 0.8720 | NaN    | NaN    | 0.8720 |
| 4783 | 0.8729 | NaN    | NaN    | 0.8729 |
| 4784 | 0.8768 | NaN    | NaN    | 0.8765 |
| 4785 | NaN    | NaN    | 0.8783 | 0.8782 |
| 4786 | NaN    | 1.2161 | 0.6652 | 0.8880 |
| 4787 | NaN    | NaN    | 0.7327 | 0.8932 |
| 4788 | NaN    | NaN    | 0.8970 | 0.8970 |
| 4789 | NaN    | 0.9771 | 0.8198 | 0.8984 |
| 4790 | NaN    | 2.1544 | 0.3435 | 0.9054 |
| 4791 | 0.5847 | 0.7878 | NaN    | 0.9054 |
| 4792 | 0.9146 | NaN    | NaN    | 0.9146 |
| 4793 | NaN    | NaN    | 0.9177 | 0.9177 |
| 4794 | 0.9751 | NaN    | NaN    | 0.9191 |
| 4795 | NaN    | NaN    | NaN    | 0.9226 |
| 4796 | 1.5870 | 0.2629 | NaN    | 0.9250 |
| 4797 | 0.1620 | 0.4267 | NaN    | 0.9253 |
| 4798 | 0.2244 | 2.4844 | NaN    | 0.9259 |
| 4799 | NaN    | 1.1507 | 0.7242 | 0.9385 |
| 4800 | 0.4011 | NaN    | 0.2963 | 0.9521 |
| 4801 | NaN    | 0.5024 | 1.4065 | 0.9545 |
| 4802 | 0.9688 | NaN    | NaN    | 0.9569 |
| 4803 | NaN    | 2.8239 | 0.9654 | 0.9575 |
| 4804 | 0.1550 | 0.7555 | NaN    | 0.9704 |
| 4805 | NaN    | 0.2488 | NaN    | 0.9734 |
| 4806 | NaN    | NaN    | 0.9735 | 0.9739 |
| 4807 | NaN    | 1.4881 | 0.4806 | 0.9843 |
| 4808 | 0.8095 | NaN    | NaN    | 0.9863 |
| 4809 | 1.0026 | NaN    | NaN    | 1.0026 |
| 4810 | 1.0038 | NaN    | NaN    | 1.0038 |
| 4811 | 0.7528 | NaN    | NaN    | 1.0051 |
| 4812 | 0.3209 | 0.7118 | NaN    | 1.0180 |
| 4813 | NaN    | NaN    | 1.0241 | 1.0241 |
| 4814 | NaN    | NaN    | 0.9280 | 1.0280 |
| 4815 | 0.2056 | 0.0319 | NaN    | 1.0284 |
| 4816 | NaN    | 1.7392 | 0.3314 | 1.0353 |
| 4817 | 1.0382 | NaN    | NaN    | 1.0382 |
| 4818 | NaN    | 0.1973 | NaN    | 1.0400 |
| 4819 | NaN    | NaN    | 1.7595 | 1.0439 |
| 4820 | NaN    | 3.4998 | 0.3939 | 1.0605 |
| 4821 | NaN    | 0.3391 | NaN    | 1.0756 |
| 4822 | NaN    | NaN    | NaN    | 1.0788 |
| 4823 | NaN    | NaN    | 0.1828 | 1.0845 |
| 4824 | NaN    | 0.0851 | NaN    | 1.0855 |
| 4825 | NaN    | NaN    | NaN    | 1.0930 |
| 4826 | 0.1026 | NaN    | NaN    | 1.1029 |
| 4827 | 0.3636 | NaN    | NaN    | 1.1044 |
| 4828 | 2.1550 | 0.0721 | NaN    | 1.1139 |
| 4829 | 1.2332 | NaN    | NaN    | 1.1143 |
| 4830 | 1.1150 | NaN    | NaN    | 1.1150 |
| 4831 | 1.1196 | NaN    | NaN    | 1.1196 |
| 4832 | 1.2542 | NaN    | 1.0939 | 1.1376 |
| 4833 | 4.4480 | NaN    | NaN    | 1.1487 |
| 4834 | NaN    | 3.0958 | 0.2748 | 1.1681 |
| 4835 | NaN    | 1.1836 | NaN    | 1.1830 |
| 4836 | 0.8708 | NaN    | NaN    | 1.1867 |
| 4837 | NaN    | 0.1407 | 1.0918 | 1.2031 |
| 4838 | NaN    | NaN    | 1.2230 | 1.2230 |
| 4839 | NaN    | NaN    | NaN    | 1.2507 |
| 4840 | 1.2687 | NaN    | NaN    | 1.2682 |
| 4841 | 0.6094 | 1.9838 | NaN    | 1.2964 |
| 4842 | NaN    | NaN    | 1.3015 | 1.3016 |
| 4843 | 2.6738 | NaN    | NaN    | 1.3149 |
| 4844 | 0.4307 | NaN    | NaN    | 1.3575 |
| 4845 | 1.3604 | NaN    | NaN    | 1.3604 |
| 4846 | 1.2143 | 1.5450 | NaN    | 1.3797 |
| 4847 | NaN    | NaN    | 1.3907 | 1.3907 |
| 4848 | 0.7369 | NaN    | NaN    | 1.3955 |
| 4849 | NaN    | NaN    | NaN    | 1.4400 |
| 4850 | NaN    | NaN    | NaN    | 1.4483 |
| 4851 | NaN    | 1.7201 | 1.2008 | 1.4605 |
| 4852 | 1.2447 | NaN    | 0.9008 | 1.4656 |
| 4853 | 1.4716 | NaN    | NaN    | 1.4716 |
| 4854 | NaN    | NaN    | NaN    | 1.4738 |
| 4855 | 1.4752 | NaN    | NaN    | 1.4752 |
| 4856 | NaN    | NaN    | 1.4934 | 1.4934 |
| 4857 | NaN    | 1.7068 | 1.2886 | 1.4977 |
| 4858 | 1.5357 | NaN    | NaN    | 1.5357 |
| 4859 | 0.7816 | 0.2548 | NaN    | 1.5465 |
| 4860 | NaN    | NaN    | NaN    | 1.5708 |
| 4861 | NaN    | NaN    | 1.5827 | 1.5827 |
| 4862 | 1.6088 | NaN    | NaN    | 1.6086 |
| 4863 | NaN    | 2.4519 | 0.8122 | 1.6321 |
| 4864 | 1.7341 | NaN    | NaN    | 1.7341 |
| 4865 | 0.3114 | NaN    | NaN    | 1.8152 |
| 4866 | 1.8255 | NaN    | NaN    | 1.8255 |
| 4867 | NaN    | 2.2091 | 1.4913 | 1.8505 |
| 4868 | NaN    | 2.6053 | 1.2664 | 1.9359 |
| 4869 | 0.1078 | NaN    | NaN    | 1.9455 |
| 4870 | 1.9540 | NaN    | NaN    | 1.9540 |
| 4871 | NaN    | NaN    | NaN    | 1.9753 |
| 4872 | NaN    | NaN    | NaN    | 2.1243 |
| 4873 | 0.8889 | NaN    | NaN    | 2.1491 |
| 4874 | 0.3137 | NaN    | NaN    | 2.1537 |
| 4875 | 1.2376 | NaN    | NaN    | 2.3459 |
| 4876 | NaN    | NaN    | NaN    | 2.5537 |
| 4877 | 2.5567 | NaN    | NaN    | 2.5567 |
| 4878 | 2.6696 | NaN    | NaN    | 2.6696 |
| 4879 | NaN    | 3.2038 | 2.7275 | 2.9659 |
| 4880 | 3.0139 | NaN    | NaN    | 3.0139 |
| 4881 | 3.0459 | NaN    | NaN    | 3.0459 |
| 4882 | 3.2873 | NaN    | NaN    | 3.2871 |
| 4883 | NaN    | NaN    | NaN    | 3.6642 |
| 4884 | 1.1644 | NaN    | NaN    | 4.1644 |
| 4885 | NaN    | NaN    | NaN    | 4.3552 |

|   |        |                                                                                                             |
|---|--------|-------------------------------------------------------------------------------------------------------------|
| 0 | Q88FQ8 | Parkinson disease 7 domain-containing protein 1                                                             |
| 0 | Q9ESP1 | Stromal cell-derived factor 2-like protein 1                                                                |
| 0 | Q3U8Z5 | MIF4 domain-containing protein                                                                              |
| 0 | Q9WU84 | Copper chaperone for superoxide dismutase                                                                   |
| 0 | Q5G501 | Serine/threonine-protein phosphatase 6 regulatory ankyrin repeat subunit A                                  |
| 0 | Q8VEJ4 | Notchless protein homolog 1                                                                                 |
| 0 | Q01705 | Neurogenic locus notch homolog protein 1;Notch 1 extracellular truncation;Notch 1 intracellular             |
| 0 | Q8N1Z6 | Smad nuclear-interacting protein 1                                                                          |
| 0 | Q6PAM0 | 5-AMP-activated protein kinase subunit beta-2                                                               |
| 0 | Q9D1G2 | Phosphomevalonate kinase                                                                                    |
| 0 | Q8UJM7 | S-adenosyl-L-methionine-dependent tRNA 4-demethyllysine synthase                                            |
| 0 | Q3U5J8 | F-BAR and double SH3 domains protein 2                                                                      |
| 0 | Q9DA59 | Guanine nucleotide-binding protein G(i)(G(s)/G(o)) subunit gamma-12                                         |
| 0 | Q9D2U5 | N-alpha-acetyltransferase 38, NatC auxiliary subunit                                                        |
| 0 | Q7TNB8 | Protein strawberry notch homolog 2                                                                          |
| 0 | Q8C283 | Uveal autoantigen with coiled-coil domains and ankyrin repeats                                              |
| 0 | Q8N9B4 | WD repeat-containing protein 3                                                                              |
| 0 | Q60715 | Prolyl 4-hydroxylase subunit alpha-1                                                                        |
| 0 | Q8C283 | Histone deacetylase 7                                                                                       |
| 0 | Q9D1H6 | NADH dehydrogenase [ubiquinone] 1 alpha subcomplex assembly factor 4                                        |
| 0 | Q3X9A3 |                                                                                                             |
| 0 | Q9Z2W0 | Aspartyl aminopeptidase                                                                                     |
| 0 | Q9C867 | Transmembrane protein 33                                                                                    |
| 0 | P45376 | Aldose reductase                                                                                            |
| 0 | P62911 | 60S ribosomal protein L32                                                                                   |
| 0 | Q9Q941 |                                                                                                             |
| 0 | Q3U6C5 | Arginine/serine-rich protein 1                                                                              |
| 0 | Q88520 | Leucine-rich repeat protein SHOC-2                                                                          |
| 0 | Q9D94E |                                                                                                             |
| 0 | Q88KR5 | Protein phosphatase 1 regulatory subunit 37                                                                 |
| 0 | Q8Q5Y5 | Pre-mRNA-splicing factor 3B8                                                                                |
| 0 | Q8C7V3 | U3 small nucleolar RNA-associated protein 15 homolog                                                        |
| 0 | Q7TMM9 | Heterogeneous nuclear ribonucleoprotein Q                                                                   |
| 0 | Q88T25 | Ankyrin repeat domain-containing protein 46                                                                 |
| 0 | Q8VC87 | Alpha/beta hydrolase domain-containing protein 14B                                                          |
| 0 | Q9C864 | Protein kish/Protein kish-A                                                                                 |
| 0 | Q5G587 | Protein archede                                                                                             |
| 0 | Q9D843 | Zinc finger protein-like 1                                                                                  |
| 0 | Q9D842 | Zinc finger protein 593                                                                                     |
| 0 | Q9CQJ6 | Density-regulated protein                                                                                   |
| 0 | Q9D1Q4 | Dolichol-phosphate mannosyltransferase subunit 3                                                            |
| 0 | Q9B8Z4 | Selenoprotein 5                                                                                             |
| 0 | Q8K4J6 | MKL/myocardin-like protein 1                                                                                |
| 0 | P61600 | N-alpha-acetyltransferase 20                                                                                |
| 0 | Q9R0G7 | Zinc finger E-box-binding homeobox 2                                                                        |
| 0 | Q9R6G3 | RNA-binding protein 10                                                                                      |
| 0 | P73571 | Transporter: Sodium- and chloride-dependent glycine transporter 1                                           |
| 0 | Q9D7E3 | Ovarian cancer-associated gene 2 protein homolog                                                            |
| 0 | Q9C9V9 | DCN1-like protein 5                                                                                         |
| 0 | Q9D891 | Mediator of RNA polymerase II transcription subunit 29                                                      |
| 0 | Q9WV76 | AP complex subunit beta;AP-4 complex subunit beta-1                                                         |
| 0 | P70255 | Nuclear factor 1 C-type                                                                                     |
| 0 | Q9WV02 | RNA-binding motif protein, X chromosome;RNA-binding motif protein, X chromosome, N-terminal                 |
| 0 | Q9CXF7 | Chromodomain-helicase-DNA-binding protein 1-like                                                            |
| 0 | Q9ER52 | NADH dehydrogenase [ubiquinone] 1 alpha subcomplex subunit 13                                               |
| 0 | Q9CWT6 | Probable ATP-dependent RNA helicase DDX28                                                                   |
| 0 | Q9R9K1 | Pyridoxal-dependent decarboxylase domain-containing protein 1                                               |
| 0 | Q9ERD7 | Tubulin beta-3 chain                                                                                        |
| 0 | Q6ZWR6 | Nesprin-1                                                                                                   |
| 0 | B1AV20 | Uracil phosphoribosyltransferase homolog                                                                    |
| 0 | P83917 | Chromobox protein homolog 1                                                                                 |
| 0 | Q8B8P6 | Solute carrier family 25 member 40                                                                          |
| 0 | Q8VFT5 | Olfactory receptor                                                                                          |
| 0 | Q3G066 | Kinesin-like protein KIF3C                                                                                  |
| 0 | Q9CQJ3 | Coordinator of PRMT5 and differentiation stimulator                                                         |
| 0 | Q9JH58 | Retinoic acid early-inducible protein 1-delta;Retinoic acid early-inducible protein 1-epsilon;Retinoic acid |
| 0 | Q9JH58 | Copine-2                                                                                                    |
| 0 | Q8R9Y9 | Fidgetin-like protein 1                                                                                     |
| 0 | Q61458 | Cyclin-H                                                                                                    |
| 0 | Q5D7W7 | Uncharacterized protein KIAA1551                                                                            |
| 0 | Q8B8Y2 | Nuclear core protein 4 homolog                                                                              |
| 0 | Q61510 | E3 ubiquitin/SGS1 ligase TRIM25                                                                             |
| 0 | Q3UFS0 | Protein zyg-11 homolog B                                                                                    |
| 0 | P48771 | Cytochrome c oxidase subunit 7A2, mitochondrial                                                             |
| 0 | Q8K3W3 | Protein CAS3                                                                                                |
| 0 | Q885L7 | ADP-ribosylation factor 2                                                                                   |
| 0 | Q9C846 | Spindle and kinetochore-associated protein 2                                                                |
| 0 | Q5FWH2 | Putative E3 ubiquitin-protein ligase UNKL                                                                   |
| 0 | Q330R2 | Decaprenyl-diphosphate synthase subunit 1                                                                   |
| 0 | Q9D809 |                                                                                                             |
| 0 | Q9D1I2 | Bd10-interacting CARD protein                                                                               |
| 0 | Q8D8W9 | DORX domain-containing protein 1                                                                            |
| 0 | Q8VDH1 | F-box only protein 21                                                                                       |
| 0 | Q6ZP10 | Protein Jade-1                                                                                              |
| 0 | Q8K301 | Probable ATP-dependent RNA helicase DDX52                                                                   |
| 0 | Q3UL36 | Arginine and glutamate-rich protein 1                                                                       |
| 0 | Q8K0U3 | Transmembrane protein 17                                                                                    |
| 0 | Q8G657 | Choline/ethanolaminephosphotransferase 1                                                                    |
| 0 | Q91VL9 | Zinc finger and BTB domain-containing protein 1                                                             |
| 0 | Q6TVD4 | Dynamin-binding protein                                                                                     |
| 0 | Q9ET54 | Palladin                                                                                                    |
| 0 | Q8CHT3 | Integrator complex subunit 5                                                                                |
| 0 | Q9D8G9 | Tax1-binding protein 3                                                                                      |
| 0 | Q70494 | Transcription factor Sp3                                                                                    |
| 0 | Q9ZD60 | PDZ domain-containing protein GIPC1                                                                         |
| 0 | Q8B1D2 | Ubiquitin carboxyl-terminal hydrolase 1                                                                     |
| 0 | Q6KCD5 | Nipped-B-like protein                                                                                       |
| 0 | Q9W177 | Unconventional myosin-Ic                                                                                    |
| 0 | Q92320 | G-protein coupled receptor family C group 5 member B                                                        |
| 0 | Q61602 | Transcriptional activator GU3;Transcriptional repressor GU3R                                                |
| 0 | P30561 | Aryl hydrocarbon receptor                                                                                   |
| 0 | Q8B8W8 | Beta-arrestin-1                                                                                             |
| 0 | Q8CGP2 | Histone H2B;Histone H2B type 1-P;Histone H2B type 1-K;Histone H2B type 1-B;Histone H2B type 1               |
| 0 | Q9ESV0 | ATP-dependent RNA helicase DDX24                                                                            |
| 0 | Q5G507 | Optic atrophy 3 protein homolog                                                                             |
| 0 | Q9C150 | Translucan-associated protein subunit alpha                                                                 |
| 0 | Q5D7T3 | Protein FAM208B                                                                                             |
| 0 | Q9J1I8 | Low-density lipoprotein receptor-related protein 1B                                                         |

|            |            |
|------------|------------|
| Pddc1      | mmu:213350 |
| Sdf2l1     | mmu:64136  |
| Mif4gd     | mmu:69674  |
| Ccs        | mmu:12460  |
| Ankrd28    | mmu:105522 |
| Nrpl       | mmu:217011 |
| Notch1     | mmu:18128  |
| Snip1      | mmu:76793  |
| Prikab2    | mmu:108097 |
| Pmkv       | mmu:68603  |
| Twy1       | mmu:100929 |
| Fchs2      | mmu:207278 |
| Gng12      | mmu:14701  |
| Naa38      | mmu:78304  |
| Sbno2      | mmu:216161 |
| Uica       | mmu:72565  |
| Wdr3       | mmu:269470 |
| P4ha1      | mmu:18451  |
| Hdac7      | mmu:56233  |
| Ndufa4     | mmu:68493  |
| Zbtb21     |            |
| Dnpep      | mmu:13437  |
| Tmem33     | mmu:67878  |
| Akr1b1/Akr | mmu:11677  |
| Rpl32      | mmu:19951  |
| Cdh18      |            |
| Nrslp1     | mmu:27981  |
| Shoc2      | mmu:56392  |
| Yae1d1     | mmu:67008  |
| Ppp1r37    | mmu:232947 |
| Prpf38b    | mmu:66921  |
| Utp15      | mmu:105372 |
| Syncr1p    | mmu:56403  |
| Ankrd46    | mmu:68839  |
| Ahdh14b    |            |
| Tmem167    | mmu:66074  |
| Zbtb80s    | mmu:67106  |
| Zfp1       | mmu:81909  |
| Znf593     | mmu:68040  |
| Denr       | mmu:68184  |
| Dpm3       | mmu:68563  |
| Vimp       | mmu:109815 |
| Mkl1       | mmu:223701 |
| Naa20      | mmu:67877  |
| Zeb2       | mmu:24136  |
| Ddx28      | mmu:236732 |
| Slc6a9     | mmu:14664  |
| Ovca2      | mmu:246257 |
| Dcun1d5    | mmu:76863  |
| Med29      | mmu:67224  |
| Ap4b1      | mmu:67489  |
| Nfic       | mmu:18029  |
| RbmX       | mmu:19655  |
| Chd11      | mmu:68058  |
| Ndufa13    | mmu:67184  |
| Sla2       | mmu:71986  |
| Pdxc1      | mmu:94184  |
| Tubb3      | mmu:22152  |
| Syne1      | mmu:64009  |
| Uprt       | mmu:331487 |
| Cbx1       | mmu:12412  |
| Slc25a40   | mmu:319653 |
| Olfir732   | mmu:258659 |
| Kif3c      | mmu:16570  |
| Coprs      | mmu:66423  |
| Rae1d1/Rae | mmu:56554  |
| Cpne2      | mmu:234577 |
| Fignl1     | mmu:60530  |
| Ccnh       | mmu:66671  |
| 28104740   | mmu:67246  |
| Noc4l      | mmu:100608 |
| Trim25     | mmu:217069 |
| Zyg11b     | mmu:414872 |
| Cox7a2     | mmu:12866  |
| Casc3      | mmu:192160 |
| Arl2       | mmu:11841  |
| Sla2       | mmu:66140  |
| Unkl       | mmu:74154  |
| Pdss1      | mmu:56075  |
| 2200002D   | mmu:72275  |
|            | mmu:68480  |
| Ddrk1      | mmu:77006  |
| Fbxo21     | mmu:231670 |
| Jade1      | mmu:269424 |
| Ddx52      | mmu:78394  |
| Argul1     | mmu:234023 |
| Tmem17     | mmu:103765 |
| Cep1       | mmu:99712  |
| Zbtb1      | mmu:268564 |
| Dnmbp      | mmu:71972  |
| Palld      | mmu:72333  |
| Ints5      | mmu:109077 |
| Tax1bp3    | mmu:76281  |
| Sp3        | mmu:20687  |
| Gipc1      | mmu:67903  |
| Usp1       | mmu:230484 |
| Nipbl      | mmu:71175  |
| Myo1c      | mmu:17913  |
| Gprc5b     | mmu:64297  |
| Gli3       | mmu:14634  |
| Ahr        | mmu:11622  |
| Arrb1      | mmu:109689 |
|            | mmu:319188 |
| Ddx24      | mmu:27225  |
| Opa3       | mmu:403187 |
| Sr1        | mmu:107513 |
| Fam208b    | mmu:105203 |
| Lrp1b      |            |
